# Supplementary material for: Detection of new pioneer transcription factors as cell-type-specific nucleosome binders
Source: eLife. 2024 Jan 31;12:RP88936. doi: 10.7554/eLife.88936 (PMC10945518; doi:10.7554/eLife.88936)
Supplement: Figure 1—figure supplement 2—source data 1. [file elife-88936-fig1-figsupp2-data1.xlsx]

## Sheet: Sheet1
Position	WW	SS	YY	RR
-501	23437880	10991973	19532317	19531602
-500	41560198	20153376	35491899	35487860
-499	38371080	18744322	33204892	33191330
-498	39569946	19080751	33981532	33956843
-497	39112149	19010094	33719117	33685556
-496	39275221	19023506	33804243	33775358
-495	39199634	19020736	33748762	33738753
-494	39243937	19014286	33755257	33771351
-493	39200680	19019031	33727629	33764299
-492	39222174	19029477	33734386	33785582
-491	39197258	19032882	33730835	33775244
-490	39204966	19035685	33766527	33774408
-489	39187082	19040313	33776815	33755354
-488	39210981	19039884	33782994	33753697
-487	39212407	19032178	33767308	33755717
-486	39219984	19031194	33755807	33776086
-485	39203208	19033691	33746029	33781783
-484	39199953	19033895	33742787	33782203
-483	39187170	19034633	33737218	33773180
-482	39185178	19045793	33743928	33768095
-481	39191303	19048274	33746913	33756129
-480	39207945	19041972	33761909	33740321
-479	39205943	19043876	33778859	33724738
-478	39204182	19043530	33776891	33725363
-477	39203321	19042877	33765531	33730401
-476	39202880	19043211	33767324	33729382
-475	39198637	19047491	33767704	33734555
-474	39197694	19052694	33760566	33755633
-473	39198504	19054015	33750822	33762697
-472	39197039	19051049	33753394	33756279
-471	39187252	19054235	33756520	33761808
-470	39175124	19069598	33757029	33765978
-469	39159928	19079810	33766605	33757696
-468	39152267	19077620	33780093	33746187
-467	39154593	19074904	33780307	33739071
-466	39158143	19070403	33778872	33743629
-465	39171861	19068230	33783010	33743394
-464	39182873	19074903	33785780	33736808
-463	39172866	19081470	33783462	33731324
-462	39162277	19083617	33779420	33728035
-461	39168253	19083501	33776986	33729240
-460	39174456	19083393	33777568	33721323
-459	39177832	19083239	33781807	33722943
-458	39182604	19076539	33778651	33732748
-457	39188461	19069096	33781562	33732959
-456	39194671	19070789	33782463	33724440
-455	39202512	19071031	33775781	33714095
-454	39208329	19074846	33776518	33705333
-453	39206636	19085810	33777039	33710548
-452	39197309	19084926	33776439	33716181
-451	39187572	19093998	33779816	33717335
-450	39182072	19117063	33786829	33730408
-449	39174152	19126641	33798737	33732558
-448	39192459	19118764	33809946	33725272
-447	39215430	19103104	33810513	33708335
-446	39216754	19102444	33814100	33697667
-445	39217576	19107104	33815750	33696472
-444	39216303	19105984	33818798	33697502
-443	39205091	19109598	33821216	33699656
-442	39186422	19115431	33820613	33703868
-441	39181271	19116829	33818267	33707338
-440	39188358	19120714	33810233	33709001
-439	39194343	19127447	33807182	33712227
-438	39193944	19131798	33805296	33707244
-437	39184938	19141825	33803851	33703070
-436	39185053	19152990	33800577	33704862
-435	39194374	19145213	33789439	33711941
-434	39201226	19136493	33778908	33726482
-433	39196989	19125511	33767026	33744259
-432	39196435	19117306	33751420	33756093
-431	39198044	19128298	33746574	33757226
-430	39187791	19134557	33745782	33755664
-429	39185130	19129371	33748713	33752597
-428	39195480	19124566	33750976	33747483
-427	39204052	19131361	33755563	33751851
-426	39203375	19142402	33758194	33759064
-425	39205178	19143812	33756901	33760698
-424	39202656	19141162	33751714	33765604
-423	39200156	19138197	33752143	33766986
-422	39200530	19130432	33761051	33751877
-421	39202491	19117547	33759567	33735280
-420	39213215	19107862	33762312	33733983
-419	39211474	19109819	33772753	33741241
-418	39209300	19115806	33777550	33738473
-417	39215593	19121337	33781115	33725751
-416	39220134	19119919	33789555	33718794
-415	39210429	19111660	33789016	33722385
-414	39204696	19112921	33783872	33736664
-413	39214986	19117077	33776763	33737941
-412	39222568	19104673	33766651	33731598
-411	39217620	19101174	33765836	33736900
-410	39214971	19114650	33773753	33730826
-409	39212356	19114503	33787998	33721825
-408	39212953	19109026	33802095	33726053
-407	39221476	19107392	33803312	33731718
-406	39221485	19107093	33803568	33726408
-405	39212464	19109044	33807718	33713931
-404	39205964	19105376	33806326	33711523
-403	39215941	19101762	33803800	33730411
-402	39209888	19099256	33790053	33740199
-401	39200201	19103841	33781723	33744090
-400	39200400	19105626	33783062	33759983
-399	39202807	19101114	33786083	33772033
-398	39192682	19109957	33790302	33778539
-397	39177210	19109918	33783491	33776667
-396	39180198	19102547	33781184	33767289
-395	39184576	19099371	33777891	33760674
-394	39187681	19094289	33778499	33772708
-393	39185897	19088714	33783587	33775436
-392	39191832	19088018	33787823	33776324
-391	39198229	19079119	33790276	33788222
-390	39194995	19073583	33780688	33790346
-389	39191574	19087314	33767042	33802221
-388	39190780	19087185	33758156	33816869
-387	39194872	19079368	33759246	33815847
-386	39196828	19082020	33773628	33813839
-385	39189831	19080108	33781407	33811571
-384	39189293	19073675	33773855	33806492
-383	39184620	19074236	33763858	33811109
-382	39175224	19075476	33758684	33817013
-381	39179599	19066184	33760222	33813636
-380	39188504	19057251	33751216	33819653
-379	39197222	19050748	33734116	33844368
-378	39201368	19043171	33724809	33856616
-377	39203951	19045619	33743893	33844732
-376	39198994	19054364	33761085	33833177
-375	39198716	19056015	33762869	33830053
-374	39195067	19058817	33778312	33833460
-373	39183383	19062860	33781422	33833338
-372	39184231	19054515	33772493	33825554
-371	39195271	19053625	33772624	33822162
-370	39202423	19050931	33768569	33818362
-369	39204830	19042268	33762270	33819061
-368	39213861	19045275	33760300	33820917
-367	39216288	19038421	33763041	33815770
-366	39228420	19021373	33764983	33811234
-365	39241871	19009221	33761353	33809012
-364	39246746	19011809	33759292	33801769
-363	39255749	19018961	33770709	33797618
-362	39259165	19009572	33776691	33802261
-361	39265290	18993614	33768213	33804489
-360	39267449	18983808	33760980	33802017
-359	39281920	18976724	33752576	33810496
-358	39306059	18967488	33741933	33825593
-357	39326372	18961853	33731044	33834387
-356	39343628	18964011	33722420	33847696
-355	39352457	18962225	33703520	33855213
-354	39360457	18947768	33686321	33858271
-353	39372513	18945238	33675661	33864645
-352	39375129	18948327	33675815	33859721
-351	39369908	18940662	33686672	33860523
-350	39364009	18936718	33687257	33862915
-349	39363600	18939975	33698743	33857669
-348	39361544	18956735	33708413	33853174
-347	39361922	18955697	33706469	33848105
-346	39385363	18940818	33703842	33846032
-345	39403625	18934339	33693937	33840251
-344	39420109	18922683	33690735	33834218
-343	39433401	18915549	33695124	33834477
-342	39411107	18911332	33694115	33839619
-341	39395775	18905595	33696546	33851778
-340	39396558	18913429	33699874	33865434
-339	39379729	18936785	33700027	33874417
-338	39360380	18949311	33700254	33885104
-337	39358206	18945681	33693353	33894695
-336	39370132	18936518	33696078	33887363
-335	39376542	18929236	33698035	33869874
-334	39375859	18936058	33701991	33857924
-333	39360450	18938472	33699214	33848875
-332	39343828	18935012	33694563	33854343
-331	39340098	18937356	33697190	33871405
-330	39329025	18932430	33693222	33879273
-329	39307094	18930092	33695522	33887849
-328	39287211	18931688	33684902	33891853
-327	39300176	18927375	33672405	33898569
-326	39325461	18918654	33673303	33903149
-325	39338500	18913812	33681937	33893176
-324	39342750	18913446	33692538	33889690
-323	39340606	18916831	33698721	33878068
-322	39332103	18913515	33712632	33856678
-321	39309901	18906840	33726488	33844929
-320	39295167	18912491	33733682	33838261
-319	39288300	18917396	33735595	33822120
-318	39286516	18923508	33737017	33823586
-317	39287135	18932446	33750664	33834286
-316	39296850	18927455	33770655	33820746
-315	39318293	18918721	33778389	33797980
-314	39332569	18903604	33767489	33782247
-313	39352504	18884776	33755036	33782602
-312	39360795	18882693	33745789	33789966
-311	39343061	18896632	33741033	33792033
-310	39319228	18918878	33735120	33789943
-309	39292571	18932997	33739477	33800353
-308	39267453	18935829	33750541	33806620
-307	39250544	18938879	33736166	33808985
-306	39248323	18938146	33713917	33828703
-305	39246631	18928129	33702493	33837674
-304	39259498	18935637	33699997	33837053
-303	39282185	18936266	33700604	33832495
-302	39304364	18920861	33710247	33826380
-301	39301831	18908208	33712132	33826655
-300	39285809	18907506	33705726	33838633
-299	39280525	18925548	33693606	33862756
-298	39263974	18931179	33675013	33869078
-297	39256496	18936346	33663296	33852601
-296	39273549	18945271	33666642	33837530
-295	39289679	18933792	33676212	33827089
-294	39304478	18922854	33675732	33815132
-293	39328519	18912311	33674470	33806636
-292	39346645	18896169	33678108	33815111
-291	39343458	18887008	33680150	33819421
-290	39334547	18883786	33671755	33818672
-289	39329731	18896296	33662717	33811732
-288	39320033	18914908	33670108	33796308
-287	39317542	18929774	33690120	33780078
-286	39325283	18919845	33715756	33761842
-285	39340817	18897595	33752657	33743714
-284	39342442	18883875	33778621	33712945
-283	39333427	18864642	33790305	33694065
-282	39333490	18863873	33802886	33687969
-281	39327382	18879217	33815041	33664298
-280	39317906	18891310	33817587	33638397
-279	39330795	18909994	33821889	33638417
-278	39341860	18911738	33823095	33648463
-277	39347294	18902740	33807919	33658067
-276	39349686	18902519	33792800	33670548
-275	39336767	18898980	33785093	33672584
-274	39338001	18894830	33787919	33657234
-273	39349724	18891703	33783898	33649898
-272	39355822	18897968	33762561	33660609
-271	39363908	18901461	33748389	33670373
-270	39373635	18904423	33756332	33679917
-269	39377862	18913597	33778506	33682258
-268	39376472	18918896	33800264	33678534
-267	39356238	18931132	33812264	33677639
-266	39333924	18936799	33817378	33680325
-265	39330059	18930467	33810575	33694991
-264	39340826	18930873	33788467	33701925
-263	39359126	18932777	33778871	33706848
-262	39376368	18920863	33778495	33711818
-261	39405033	18905974	33785771	33700860
-260	39420221	18908294	33803783	33701725
-259	39414765	18923686	33805892	33721061
-258	39405170	18957391	33803370	33745136
-257	39377860	19010865	33810302	33752602
-256	39349493	19053645	33816777	33733412
-255	39348945	19058021	33829653	33693866
-254	39356296	19047957	33832855	33654758
-253	39373549	19027821	33816811	33638856
-252	39407049	18992315	33809244	33631999
-251	39426695	18970951	33811298	33626586
-250	39438378	18970439	33818210	33633715
-249	39452896	18991771	33816929	33643412
-248	39450268	19005276	33800241	33641596
-247	39429950	19004760	33792965	33655591
-246	39408644	19014389	33766701	33680957
-245	39390292	19020247	33737545	33695830
-244	39369309	19021217	33746331	33710034
-243	39354590	19012368	33766455	33714889
-242	39344008	18995087	33774035	33721543
-241	39329529	18985605	33772153	33739674
-240	39308649	18989056	33770267	33766081
-239	39281524	19015758	33735956	33806338
-238	39260068	19049462	33686532	33855962
-237	39259402	19065967	33674958	33893387
-236	39261688	19069609	33693747	33902821
-235	39253781	19063985	33728701	33893531
-234	39259141	19033730	33760769	33860947
-233	39295529	18999653	33754499	33840943
-232	39333587	18979712	33716477	33837650
-231	39365168	18970257	33705424	33822123
-230	39374836	18958314	33736407	33797654
-229	39358670	18945767	33778414	33777491
-228	39354678	18935944	33822176	33770714
-227	39351544	18907767	33846615	33761807
-226	39353362	18891955	33828454	33760398
-225	39357325	18902747	33785318	33763013
-224	39374857	18920235	33752850	33764221
-223	39398280	18915344	33728944	33762953
-222	39419720	18889167	33717544	33754743
-221	39444959	18866354	33723482	33742547
-220	39467072	18845417	33735907	33746674
-219	39485967	18842697	33746931	33768420
-218	39474306	18859860	33749266	33784180
-217	39441306	18885927	33733809	33804523
-216	39412618	18912707	33712052	33847002
-215	39392827	18931494	33695132	33893465
-214	39380415	18942709	33684358	33922168
-213	39376400	18948188	33690563	33938108
-212	39377150	18941480	33704284	33926656
-211	39372189	18930602	33712936	33900376
-210	39356669	18914528	33682793	33897285
-209	39344728	18896402	33633938	33927062
-208	39326991	18906981	33603778	33975361
-207	39281863	18945101	33575233	34005373
-206	39241652	18991722	33566480	34010012
-205	39238424	19021655	33573182	33995897
-204	39251141	19026438	33579051	33960517
-203	39260138	19021881	33591888	33920899
-202	39259455	19018909	33612844	33888639
-201	39242237	19024513	33641643	33839848
-200	39230943	19013030	33678436	33803630
-199	39222375	18980939	33727709	33804491
-198	39198844	18966388	33771845	33807422
-197	39170240	18965561	33802543	33820430
-196	39130444	18972970	33828396	33843643
-195	39084425	18996941	33855103	33856884
-194	39059319	19032353	33876360	33863453
-193	39058023	19059479	33871614	33870675
-192	39057254	19071259	33850910	33876702
-191	39050188	19083852	33851853	33889140
-190	39041617	19080671	33897245	33877221
-189	39046582	19042054	33954340	33811877
-188	39069486	18998870	33983503	33740399
-187	39093898	18973365	34008552	33710984
-186	39120483	18962264	34020588	33720219
-185	39149969	18955094	33984033	33761573
-184	39198011	18930694	33908876	33822839
-183	39267722	18883446	33843210	33853292
-182	39326746	18826830	33838751	33839578
-181	39375287	18783786	33883233	33796884
-180	39409242	18757780	33926187	33749540
-179	39400881	18740263	33919522	33724573
-178	39385947	18744588	33867784	33748371
-177	39380366	18763764	33844090	33799335
-176	39355157	18787714	33853261	33829688
-175	39335131	18839061	33857221	33841749
-174	39316691	18877814	33870789	33829187
-173	39285447	18880831	33884589	33804411
-172	39284119	18871982	33860670	33795432
-171	39301104	18873461	33809129	33806919
-170	39303916	18914521	33776913	33819796
-169	39299662	18956930	33771469	33849183
-168	39303458	18939735	33765820	33909517
-167	39312001	18879305	33714698	33983371
-166	39319527	18862037	33646361	34080415
-165	39323629	18869089	33633886	34158192
-164	39314779	18846890	33637742	34173645
-163	39312619	18822942	33614551	34134992
-162	39312480	18844666	33565013	34073828
-161	39316997	18896491	33509200	34018002
-160	39361456	18882985	33479614	33989506
-159	39422868	18822575	33473961	34020320
-158	39454733	18797382	33476390	34057120
-157	39447023	18800259	33458020	34079590
-156	39434037	18819834	33453250	34083119
-155	39430897	18833552	33498834	34045167
-154	39425776	18817885	33535682	33981657
-153	39419007	18820588	33539265	33908676
-152	39410712	18878959	33587498	33856748
-151	39406921	18909958	33657591	33810354
-150	39427919	18873977	33723081	33754057
-149	39450876	18820443	33811223	33746033
-148	39469367	18778546	33873014	33765850
-147	39487181	18763905	33879318	33748724
-146	39478934	18784808	33887580	33727048
-145	39455390	18850668	33887634	33728004
-144	39450647	18946579	33875271	33745604
-143	39434186	18972688	33896176	33755871
-142	39419084	18918154	33923506	33783393
-141	39398749	18852885	33902642	33805871
-140	39348636	18810748	33835661	33801871
-139	39321443	18821525	33792067	33809403
-138	39336548	18817250	33755106	33829430
-137	39384683	18785171	33667478	33903776
-136	39426236	18774531	33548247	34013592
-135	39434159	18770444	33473787	34124268
-134	39435266	18801781	33442772	34242731
-133	39429081	18863090	33470391	34257120
-132	39403841	18845081	33559096	34141124
-131	39386424	18781884	33646121	34065544
-130	39387535	18750925	33650009	34070089
-129	39426680	18704461	33565066	34140143
-128	39504606	18659981	33472157	34181706
-127	39528712	18690245	33475662	34152046
-126	39497509	18723533	33606782	34087094
-125	39531552	18713879	33766700	34014647
-124	39562544	18723253	33783115	34002826
-123	39528308	18768666	33635466	34070018
-122	39460769	18817627	33488448	34145939
-121	39419344	18837885	33445869	34179708
-120	39406233	18845877	33494821	34169687
-119	39406537	18836725	33550158	34067670
-118	39434000	18770336	33629903	33953770
-117	39431153	18719730	33734513	33893803
-116	39409583	18734765	33709020	33881890
-115	39385852	18786467	33558586	33887442
-114	39348244	18848558	33458515	33926221
-113	39317061	18914860	33414669	33973972
-112	39294785	18922389	33389561	33950519
-111	39318362	18881433	33434068	33898917
-110	39373767	18849924	33571574	33837970
-109	39430141	18789314	33759933	33734286
-108	39425041	18755035	33903768	33628121
-107	39328083	18782797	33940686	33599345
-106	39242432	18869855	33876610	33626245
-105	39212290	18920635	33815877	33664343
-104	39220129	18902966	33767054	33753714
-103	39221235	18913194	33716959	33798084
-102	39235135	18979360	33746040	33737486
-101	39249151	19020699	33823130	33668188
-100	39275809	18936981	33880844	33638365
-99	39330500	18817793	33848976	33728924
-98	39382929	18756715	33705922	33874830
-97	39458240	18720775	33593824	33938012
-96	39566255	18681557	33647845	33880441
-95	39626871	18674684	33835580	33729526
-94	39651430	18690859	33979189	33595855
-93	39736501	18643794	34023322	33558454
-92	39800353	18531974	34021870	33570580
-91	39853317	18465506	33910905	33601072
-90	39963874	18382893	33724118	33637860
-89	40100867	18277189	33593312	33693601
-88	40219212	18206442	33522186	33726163
-87	40336479	18140301	33499985	33683483
-86	40369588	18146531	33542981	33691287
-85	40286274	18246678	33546029	33767594
-84	40200401	18423980	33449085	33767520
-83	40141894	18539500	33347940	33697489
-82	40170913	18459140	33222463	33764546
-81	40287932	18284282	32997052	34025507
-80	40503425	18082152	32817007	34159687
-79	40913505	17821412	32987060	33997008
-78	41459271	17476464	33502776	33607814
-77	42777657	16535539	33810170	33077163
-76	44999487	14344722	32913244	33536395
-75	45725905	12855532	30427238	36408484
-74	43115780	14698630	27455125	40529129
-73	37516905	18780554	25511726	43464790
-72	31473342	22616663	25337991	44475662
-71	27941793	24798198	27189301	43514750
-70	29417121	24991002	30637238	40307002
-69	34577337	22011003	33713449	36239749
-68	38530073	18660184	35169120	34048718
-67	40034441	17816495	35498405	33636680
-66	39850709	17992291	35283943	33482559
-65	38677761	18757089	34961559	33356203
-64	37306699	19749105	34835544	33199676
-63	36216191	20612750	34872322	33133625
-62	35710940	21105510	35003141	32982508
-61	35919302	21108274	35335672	32713301
-60	36862180	20592168	35691175	32515431
-59	38317531	19832153	35997357	32295909
-58	39779562	19073901	36295350	31964439
-57	40587490	18534339	36222088	31836771
-56	40356477	18473585	35612804	32175737
-55	39333635	18850988	34884794	32743526
-54	38049299	19488013	34301129	33411805
-53	36864898	20306080	33789973	34086271
-52	36155544	20998222	33553594	34419816
-51	36271844	21053262	33850819	34289579
-50	37178088	20448308	34445457	33877283
-49	38447541	19555707	34831590	33526152
-48	39472837	18831390	34695510	33528179
-47	39696267	18636756	34110985	33939557
-46	39269002	18838806	33348083	34736101
-45	39004583	18930706	32710639	35527313
-44	39251474	18619710	32388104	35891171
-43	39426998	18394992	32227621	35831084
-42	38915500	18868917	32188305	35468755
-41	38075121	19649379	32528063	34824596
-40	37686570	19967642	33413199	33998515
-39	37963592	19797037	34619186	33261872
-38	38767879	19316283	35397167	32803278
-37	39779376	18664762	35308677	32857815
-36	40256836	18330181	34479357	33597169
-35	39571217	18675063	33456790	34559388
-34	38073295	19477382	32899024	35190620
-33	36757999	20183904	32732292	35431014
-32	36163243	20590500	32864380	35276216
-31	36322836	20676507	33515881	34674738
-30	37176582	20280303	34542900	33765933
-29	38312006	19519112	35395428	33045285
-28	39252505	18828729	35509137	33074589
-27	39898779	18366067	34852196	33741994
-26	40259166	18090898	34001728	34526035
-25	40118445	18091026	33367872	35067087
-24	39483848	18424445	33055202	35034500
-23	38704179	19038793	33323439	34155980
-22	37982429	19650939	33950081	32828441
-21	37415518	20059517	34418471	31850496
-20	37074888	20237164	34729497	31474769
-19	37090216	20206230	35060956	31532617
-18	37470569	20045699	35344474	31966956
-17	38136531	19785652	35181016	32699761
-16	39169606	19251772	34480315	33632708
-15	40098997	18611194	33875726	34267170
-14	40225059	18266701	33494126	34414576
-13	39644081	18276974	32685182	34831769
-12	38974887	18618089	31587787	35703111
-11	38789870	18951731	31264783	36001923
-10	39071359	18916399	32311164	35136092
-9	38947276	18878338	34045851	33960850
-8	37870506	19356593	35217026	33456581
-7	36868511	20020316	35393244	33620432
-6	36802164	20187968	35078947	33928501
-5	37044714	19997279	34594769	34247315
-4	37045056	19932608	33890157	34743698
-3	36845488	20094972	33204380	35181409
-2	36535559	20378165	33015385	35130621
-1	36339284	20559022	33428389	34581071
0	36360361	20567919	34233312	33794267
1	36534253	20437204	34979833	33158049
2	36801372	20208998	35275136	33068532
3	36992764	20010047	35011567	33553497
4	37015617	19976984	34454983	34267075
5	36832727	20077538	34026810	34779850
6	36703147	20057764	33773977	35140751
7	37314612	19613438	33580899	35322752
8	38505273	18989335	33731560	34680250
9	39104163	18817241	34596133	33095540
10	38916325	18973858	35693543	31596050
11	38903826	18856465	36042018	31326138
12	39525773	18475593	35435972	32237225
13	40270357	18289745	34755980	33293614
14	40344222	18445990	34443627	33739237
15	39538024	18934552	33937281	34068209
16	38357855	19537766	33004245	34739066
17	37467567	19901625	32125268	35200263
18	37000819	20116160	31605795	35127707
19	36871051	20253050	31402591	34815499
20	37198317	20157573	31615514	34537395
21	37898634	19845600	32406094	34235102
22	38686723	19350745	33706597	33689664
23	39428159	18727466	34914321	33197467
24	40005624	18229527	35279509	33204230
25	40261002	18059786	34846487	33659489
26	40062979	18195158	34095814	34384029
27	39473830	18555450	33286891	35117855
28	38626091	19164638	32892633	35400449
29	37533997	19986723	33322605	34880461
30	36561370	20607001	34255511	33886275
31	36178468	20689448	35078045	33095330
32	36527628	20385493	35496006	32818771
33	37607268	19818565	35479218	32938421
34	39087900	19029718	35028901	33296943
35	40123267	18412152	34126780	33999149
36	40034941	18429754	33095477	34869286
37	39058895	18968645	32645557	35269215
38	38079519	19557821	32949494	34857384
39	37653727	19913282	33655943	33862783
40	37886878	19861453	34516464	32872653
41	38668760	19280627	35299794	32316413
42	39407599	18592096	35808289	32215490
43	39461087	18502314	35993817	32322147
44	39082067	18841591	35796435	32502580
45	39092513	18900946	35157349	32986736
46	39568381	18660934	34310638	33739607
47	39668070	18632195	33653788	34379076
48	38916982	19138950	33434998	34704153
49	37662707	20028750	33660857	34561409
50	36528256	20829688	34089471	34061598
51	36101074	21148994	34424960	33650978
52	36546012	20739296	34399359	33689669
53	37636735	19894664	33874773	34167163
54	38918101	19131109	33177817	34733429
55	40046957	18586385	32534453	35300533
56	40632715	18403367	31990854	35912587
57	40176572	18712951	31820614	36155034
58	38856550	19385642	32031904	35912581
59	37328964	20195578	32302293	35629976
60	36150215	20886615	32510214	35422743
61	35662516	21184639	32786383	35134812
62	35983237	20909055	33109790	34967390
63	37000455	20170017	33323098	34974409
64	38374584	19248216	33532916	35009244
65	39622567	18373518	33693084	35184636
66	40129678	17829505	33614223	35397984
67	39260357	18249945	33788291	35262765
68	36307014	20421123	35002452	34237944
69	31424771	23505047	37764460	31787121
70	27709439	25065156	41445372	28517511
71	28831032	24075761	44127503	26083623
72	34418840	20831023	44438576	25386137
73	40805226	16473522	42443142	26434375
74	45132044	12924498	38862295	28958778
75	46375489	13061946	34878202	31983298
76	43936253	15857400	32861785	33789681
77	41690236	17273497	33303819	33725074
78	41270054	17684639	33972498	33132228
79	40668956	18044327	34191417	32824164
80	40348460	18182259	34172428	32820603
81	40221131	18302509	33900762	33074799
82	40187302	18441943	33698523	33260807
83	40189045	18477930	33723255	33389169
84	40257043	18335212	33830122	33486820
85	40347681	18201304	33801433	33540167
86	40361443	18157451	33723211	33513769
87	40282412	18184295	33725483	33489417
88	40168140	18252083	33738610	33538840
89	40041003	18356022	33700018	33640530
90	39916246	18460134	33657706	33788790
91	39826051	18493497	33634633	33919566
92	39784057	18556436	33601553	33967259
93	39693912	18613400	33570492	33946825
94	39609675	18638213	33648345	33870608
95	39602356	18680025	33816547	33727066
96	39541492	18736617	33971395	33582365
97	39430415	18768733	34001985	33592217
98	39363703	18766674	33862756	33745901
99	39314632	18868428	33708287	33866774
100	39268819	19015280	33679798	33886636
101	39248286	19030074	33728773	33781732
102	39220987	18933959	33784629	33690532
103	39213108	18888356	33822958	33692988
104	39221585	18920320	33779877	33735545
105	39242846	18889774	33682992	33797130
106	39290187	18792650	33632966	33866256
107	39357971	18762866	33629266	33919782
108	39406600	18788529	33700437	33833339
109	39384741	18833966	33826696	33632733
110	39339618	18882930	33915347	33472118
111	39317415	18916409	33973740	33394703
112	39327520	18928945	34031696	33379216
113	39352026	18888086	34019877	33388400
114	39386355	18840203	33964268	33447403
115	39403639	18785971	33937488	33583748
116	39419338	18733308	33924988	33688050
117	39452105	18732072	33957051	33633248
118	39435717	18780664	34042705	33531020
119	39404431	18829167	34141151	33481880
120	39390542	18847597	34204511	33439725
121	39422213	18852466	34198460	33443149
122	39505820	18804021	34143160	33535916
123	39582854	18732625	34082315	33677824
124	39594732	18696609	34053679	33748506
125	39541310	18710711	34097309	33672929
126	39523063	18706986	34171569	33509753
127	39525046	18670808	34215254	33414820
128	39460290	18689635	34194791	33478978
129	39391521	18728330	34128876	33596455
130	39389185	18754157	34084394	33644594
131	39407419	18802775	34111005	33608561
132	39435740	18866716	34226255	33516882
133	39448102	18857958	34308416	33425566
134	39451168	18786107	34228663	33412093
135	39437931	18756448	34084140	33472636
136	39394861	18776950	33991302	33568088
137	39346833	18798438	33894851	33663536
138	39318460	18819697	33828294	33733184
139	39331413	18819677	33832960	33777203
140	39364702	18802735	33836681	33818200
141	39398661	18840169	33823957	33859364
142	39423858	18909575	33787640	33872774
143	39446770	18953501	33756100	33857920
144	39464289	18911728	33756069	33847284
145	39460612	18831828	33762472	33867935
146	39463863	18788621	33782003	33858965
147	39460254	18774127	33805909	33845064
148	39438760	18803377	33798593	33831451
149	39433933	18858182	33779381	33763856
150	39428610	18911693	33806204	33683227
151	39421084	18891235	33858200	33583832
152	39425034	18832585	33906497	33510597
153	39425665	18817048	33968773	33503338
154	39414085	18819007	34024349	33496521
155	39411094	18823291	34079885	33452076
156	39427442	18814113	34100946	33429951
157	39439629	18812690	34089170	33460062
158	39430424	18831414	34065873	33469775
159	39392765	18861842	34033796	33459569
160	39328380	18903016	34029283	33463395
161	39292178	18884986	34060683	33485448
162	39304794	18833564	34152810	33537826
163	39310657	18842448	34230836	33583197
164	39314828	18879090	34231876	33604837
165	39332154	18874852	34169677	33618641
166	39330151	18851047	34062139	33651610
167	39310090	18887187	33961807	33722072
168	39298071	18944347	33895518	33762184
169	39303966	18943605	33856954	33756109
170	39309993	18907353	33842478	33758333
171	39288061	18878746	33837886	33802402
172	39270265	18876495	33836746	33845143
173	39286893	18872977	33849175	33830724
174	39324174	18851612	33862472	33807463
175	39360435	18817967	33869856	33819868
176	39365866	18769734	33842845	33821697
177	39386293	18740869	33783300	33831738
178	39406806	18738263	33752850	33866824
179	39401257	18738066	33759563	33888300
180	39389139	18751658	33797107	33863529
181	39334572	18798827	33850896	33815702
182	39279648	18852367	33877350	33795754
183	39237123	18903534	33870856	33829114
184	39180972	18948478	33826997	33907798
185	39131994	18968558	33773194	33974219
186	39103356	18970436	33746838	33994657
187	39078714	18979596	33749262	33978288
188	39049111	19022825	33802336	33945576
189	39042825	19064421	33878337	33897014
190	39038284	19082639	33910504	33843300
191	39043004	19074189	33894604	33821321
192	39064943	19050588	33885240	33837167
193	39064352	19026961	33885580	33845729
194	39077162	18999962	33887958	33844850
195	39121871	18971078	33879111	33835820
196	39176499	18958950	33857808	33805500
197	39221974	18968913	33841811	33774423
198	39236356	18975207	33828068	33739031
199	39234996	18999638	33835591	33693891
200	39230167	19030188	33850755	33647867
201	39237026	19030799	33882092	33604938
202	39251258	19021986	33920714	33569263
203	39259904	19017029	33959677	33559102
204	39253433	19020496	34005896	33558666
205	39244101	19012585	34039490	33550016
206	39272495	18974423	34048828	33550152
207	39321945	18928600	34024152	33565289
208	39345350	18899395	33974865	33585964
209	39362345	18895417	33930221	33627876
210	39372868	18913540	33913443	33674810
211	39361242	18947182	33944348	33677931
212	39367709	18962692	33975872	33659851
213	39387454	18951520	33968800	33655788
214	39407050	18938422	33952830	33664020
215	39431086	18922653	33910750	33675473
216	39451738	18897159	33846442	33703940
217	39469333	18868267	33806850	33728210
218	39472953	18851024	33787835	33730296
219	39463078	18847847	33770339	33710241
220	39444446	18847294	33771868	33682956
221	39421436	18859209	33783062	33667563
222	39400055	18887809	33783418	33676052
223	39377759	18910375	33785562	33708325
224	39365836	18906182	33782748	33731736
225	39362340	18897155	33786147	33766528
226	39351937	18901655	33794191	33807897
227	39341616	18914026	33782608	33806997
228	39352138	18929748	33786109	33773540
229	39369879	18941327	33812425	33725482
230	39370932	18954272	33842968	33677444
231	39344007	18975642	33866199	33663614
232	39316669	18993611	33878880	33686935
233	39294887	18999854	33899349	33710890
234	39271425	19024027	33918662	33709743
235	39266466	19054793	33925459	33682450
236	39274643	19060237	33915337	33657747
237	39274237	19057746	33897437	33655741
238	39287273	19030296	33867932	33685466
239	39314985	18988299	33818819	33726476
240	39329053	18978347	33775516	33750304
241	39347433	18986310	33754796	33753797
242	39370078	18994193	33752543	33741677
243	39377158	19004024	33752054	33728022
244	39387459	19011721	33735753	33704813
245	39405953	19012056	33711935	33717430
246	39408143	19012923	33686193	33748631
247	39431887	19007288	33678105	33753004
248	39455093	18992477	33673672	33759948
249	39443291	18979765	33663991	33772687
250	39431252	18971617	33661090	33775336
251	39419888	18984141	33660798	33783634
252	39396151	19011226	33664711	33794648
253	39362349	19034951	33677053	33800071
254	39344224	19050102	33704635	33804090
255	39346434	19053065	33730765	33790840
256	39358904	19028766	33760424	33783897
257	39384276	18974283	33769135	33770396
258	39405819	18922515	33757924	33760427
259	39412619	18902079	33743604	33767780
260	39407689	18903021	33730611	33752520
261	39391687	18907345	33735588	33738490
262	39373705	18915489	33733911	33738204
263	39340843	18925142	33728748	33745937
264	39321688	18937536	33729507	33769347
265	39335962	18938532	33719880	33782040
266	39346516	18927239	33709447	33787361
267	39362515	18922563	33708596	33779166
268	39374726	18912494	33715446	33747196
269	39368309	18899762	33715603	33720226
270	39362661	18898395	33708971	33715085
271	39349932	18898109	33694937	33730008
272	39336531	18893562	33679719	33751088
273	39340096	18884321	33677966	33758754
274	39346344	18884292	33689077	33761404
275	39345233	18890599	33690664	33762043
276	39348394	18893182	33676016	33765747
277	39349902	18908306	33675773	33774833
278	39342020	18914520	33674336	33782478
279	39330112	18898934	33679954	33779567
280	39319900	18889039	33699360	33770627
281	39325345	18873293	33714380	33766660
282	39336033	18862807	33727309	33747683
283	39339081	18871128	33740192	33731652
284	39338999	18882911	33757411	33726309
285	39325820	18904297	33772914	33711268
286	39317562	18916834	33784921	33681100
287	39325571	18914552	33808929	33658853
288	39335369	18901438	33832098	33650078
289	39339893	18885097	33849661	33645157
290	39343081	18886466	33856244	33653637
291	39344834	18888752	33845997	33660740
292	39333069	18898913	33845350	33653016
293	39306053	18920881	33842162	33652148
294	39279005	18938613	33843849	33651150
295	39268564	18950510	33859024	33638501
296	39274567	18942679	33879551	33635832
297	39283148	18927507	33905486	33640996
298	39278680	18916148	33907915	33654847
299	39287211	18908939	33885886	33668463
300	39305896	18900166	33863329	33676415
301	39309838	18904577	33855448	33679542
302	39298525	18925605	33864500	33665414
303	39283739	18935606	33867434	33663686
304	39264288	18937347	33869500	33677816
305	39243361	18942650	33868919	33686017
306	39247166	18944872	33854801	33699170
307	39263267	18936422	33847818	33713479
308	39273556	18931091	33836179	33714005
309	39290514	18930794	33829282	33705500
310	39313129	18913958	33833094	33701511
311	39340297	18894750	33824772	33706363
312	39345604	18892971	33817637	33711031
313	39332422	18902912	33817109	33728929
314	39324059	18911530	33816537	33753094
315	39304154	18920964	33833996	33749274
316	39285894	18933385	33863707	33730155
317	39285215	18937062	33884335	33706512
318	39288136	18928874	33895261	33687490
319	39291007	18914447	33893020	33689411
320	39302656	18904419	33886514	33693524
321	39327125	18905755	33888369	33688514
322	39349886	18913713	33899557	33683277
323	39346054	18919044	33913396	33675906
324	39331731	18919987	33925251	33665884
325	39321617	18919715	33932407	33656268
326	39311980	18919416	33936630	33648554
327	39306671	18929618	33936299	33646103
328	39309594	18933431	33943024	33640908
329	39322893	18926170	33946157	33640629
330	39336770	18931139	33932219	33655435
331	39341467	18934327	33918697	33669910
332	39348357	18934480	33889897	33670229
333	39364598	18938156	33880317	33669995
334	39371672	18933038	33901821	33668973
335	39369455	18930729	33915717	33659718
336	39363347	18933350	33922250	33654702
337	39361104	18941519	33917404	33667202
338	39368596	18939664	33907020	33680953
339	39381284	18924728	33904441	33677674
340	39386941	18912806	33893711	33670421
341	39412540	18910364	33882075	33665917
342	39436290	18912462	33888304	33662978
343	39425266	18918957	33879263	33650812
344	39415074	18930066	33858375	33654877
345	39396470	18937108	33858217	33673483
346	39365279	18952028	33876484	33675538
347	39354340	18956763	33890678	33674033
348	39352741	18947828	33895682	33669082
349	39355651	18938368	33893479	33664603
350	39378010	18936522	33889293	33656619
351	39384825	18932116	33889132	33635378
352	39386852	18927380	33890768	33626520
353	39379240	18938209	33890742	33639945
354	39358811	18956296	33880356	33664239
355	39341886	18966157	33871426	33684451
356	39324035	18968875	33868146	33696335
357	39312322	18973818	33857232	33704360
358	39290261	18979370	33841577	33717063
359	39271170	18987515	33838327	33729462
360	39259704	18988624	33829970	33739857
361	39247424	18999645	33827405	33745504
362	39246032	19013071	33829640	33745539
363	39245407	19014037	33822250	33744668
364	39239792	19022113	33828108	33729921
365	39227331	19025372	33839907	33722433
366	39217696	19038419	33846876	33729242
367	39210151	19044191	33840222	33725708
368	39209037	19038802	33836631	33730610
369	39204121	19045340	33840172	33734333
370	39190437	19045607	33848754	33735265
371	39184466	19053509	33861052	33742940
372	39181274	19064793	33864518	33745646
373	39182065	19066410	33859563	33747539
374	39191443	19060763	33860095	33737651
375	39196629	19051064	33870756	33723776
376	39192192	19050912	33883203	33709878
377	39195262	19048852	33892506	33695813
378	39204881	19041191	33886747	33701017
379	39198851	19051628	33868815	33721420
380	39186162	19064630	33846292	33723458
381	39182958	19063849	33843143	33724453
382	39178467	19066534	33840854	33738402
383	39179744	19072161	33821214	33750641
384	39181141	19077700	33827933	33757517
385	39191266	19077105	33839126	33747034
386	39204873	19077570	33832620	33728543
387	39201572	19085411	33839202	33723363
388	39199390	19081037	33840489	33730494
389	39197029	19081718	33831364	33733832
390	39184305	19090002	33834946	33733702
391	39181366	19089529	33829175	33744157
392	39182156	19086924	33810309	33756892
393	39182457	19091763	33806974	33753518
394	39185056	19099319	33814574	33739576
395	39177868	19099233	33810405	33741590
396	39173482	19107253	33807638	33759813
397	39189981	19106606	33812583	33762688
398	39206425	19096605	33804416	33756182
399	39200538	19096687	33788300	33753382
400	39198367	19101512	33793186	33748913
401	39204975	19104809	33793336	33742524
402	39216791	19107282	33776746	33751045
403	39212255	19105916	33759490	33757937
404	39208044	19102050	33749774	33761698
405	39221812	19105829	33757399	33764837
406	39222441	19102648	33759999	33757314
407	39223077	19104333	33756388	33758139
408	39221475	19113422	33758838	33762782
409	39208934	19115541	33766037	33752980
410	39208694	19109557	33764973	33741773
411	39219926	19106006	33759766	33747585
412	39219554	19108808	33754678	33748147
413	39212982	19107758	33752151	33748449
414	39213704	19109023	33756439	33757968
415	39216002	19114479	33760056	33761619
416	39219628	19118986	33764241	33757772
417	39215270	19117773	33770971	33745544
418	39208619	19112850	33766615	33744310
419	39209722	19108289	33759146	33749632
420	39213220	19110588	33763745	33735094
421	39212455	19114680	33771675	33727523
422	39203894	19119602	33783065	33730201
423	39194959	19131189	33794557	33727684
424	39185678	19141342	33795007	33727205
425	39194498	19137601	33795766	33730487
426	39200757	19122383	33785074	33731993
427	39191782	19124037	33764738	33740613
428	39183407	19136097	33765255	33740741
429	39180042	19138520	33774512	33725274
430	39187156	19134557	33776485	33723366
431	39190441	19132131	33762677	33728824
432	39185562	19128572	33758817	33728784
433	39186468	19133439	33761340	33738601
434	39192062	19147189	33745567	33758534
435	39196926	19146258	33729995	33767145
436	39186876	19147319	33721296	33771604
437	39178128	19145046	33721852	33771251
438	39198033	19131416	33742035	33769006
439	39201413	19121276	33746506	33766022
440	39187900	19114002	33734780	33771117
441	39192198	19109152	33738389	33781913
442	39205811	19108454	33741284	33785539
443	39210920	19108049	33730245	33785175
444	39217538	19100665	33722762	33777667
445	39221088	19093433	33732153	33781771
446	39205903	19100160	33737525	33787952
447	39193834	19111179	33739359	33791510
448	39183897	19111230	33743731	33784133
449	39187421	19109782	33755653	33770829
450	39190975	19101977	33761374	33749889
451	39189281	19088492	33753407	33731508
452	39203723	19079615	33744141	33739570
453	39212300	19069848	33738975	33745998
454	39210736	19066033	33740181	33745717
455	39206382	19070633	33748929	33749924
456	39195554	19075442	33760885	33748273
457	39183735	19078212	33764238	33737575
458	39181567	19075930	33762879	33734504
459	39180556	19075746	33757791	33738185
460	39178575	19082149	33754164	33741162
461	39163246	19086330	33755689	33746112
462	39162466	19084551	33759074	33746854
463	39176411	19069999	33757659	33749338
464	39167589	19062360	33757303	33758448
465	39163069	19070267	33765650	33759787
466	39163434	19076100	33771419	33757707
467	39156707	19082085	33769088	33751946
468	39154773	19079719	33775763	33745157
469	39165757	19066419	33779610	33740646
470	39187308	19058172	33774647	33736317
471	39197306	19060062	33776345	33723700
472	39199754	19056650	33786693	33710709
473	39212471	19046793	33791192	33721049
474	39214746	19039633	33783470	33732910
475	39207444	19031544	33774532	33732407
476	39207871	19038889	33765059	33739668
477	39198646	19049149	33762754	33742189
478	39191200	19042616	33766528	33732379
479	39188687	19039138	33771781	33730669
480	39186778	19045034	33788423	33729180
481	39192988	19044725	33805452	33715800
482	39195920	19039112	33808819	33699123
483	39200043	19041175	33810500	33698574
484	39209348	19039624	33819822	33708549
485	39206648	19035657	33815030	33716858
486	39201973	19034545	33798635	33728844
487	39212094	19032475	33795060	33736106
488	39208713	19033041	33799909	33732723
489	39198498	19036756	33808735	33725238
490	39204094	19038360	33813099	33707420
491	39209990	19028260	33814631	33694312
492	39220723	19019743	33812053	33695285
493	39231176	19017041	33799193	33703863
494	39234346	19022321	33791787	33719938
495	39225773	19024317	33789370	33728962
496	39220445	19027121	33786599	33736663
497	39226837	19028049	33797207	33740176
498	39237502	19024571	33801148	33737812
499	39242943	19019570	33795957	33728022
500	39239863	19014869	33804463	33724662
501	19620898	9509856	16906393	16865815
