# Supplementary material for: Detection of new pioneer transcription factors as cell-type-specific nucleosome binders
Source: eLife. 2024 Jan 31;12:RP88936. doi: 10.7554/eLife.88936 (PMC10945518; doi:10.7554/eLife.88936)
Supplement: Figure 2—figure supplement 1—source data 1. [file elife-88936-fig2-figsupp1-data1.xlsx]

## Sheet: Sheet1
TF_name	Cell line	Enrichment score	p_value
ZNF274	HeLa-S3	5.4033	4.65012e-12
ZNF274	K562	1.34756	7.00145e-07
IKZF1	HepG2	0.972452	0.608175
ATF2	HepG2	0.645909	1
ATF7	HepG2	0.58907	1
CEBPG	K562	0.516561	1
MAFF	HepG2	0.494471	1
CEBPB	K562	0.474904	1
ATF4	K562	0.460413	1
ATF2	K562	0.433553	1
MAFF	K562	0.407344	1
CUX1	MCF-7	0.377905	1
ATF7	MCF-7	0.373514	1
MAFK	HepG2	0.373103	1
CEBPG	MCF-7	0.365511	1
ZKSCAN1	HeLa-S3	0.363925	1
MAFG	K562	0.355733	1
MAFF	HeLa-S3	0.354208	1
HLF	HepG2	0.313731	1
NFIX	K562	0.312013	1
SRF	H1	0.304279	1
ZNF382	HepG2	0.29985	1
PBX2	K562	0.26796	1
TFE3	K562	0.263635	1
REST	HeLa-S3	0.262062	1
CREB1	HepG2	0.259344	1
CEBPB	HepG2	0.258225	1
ZNF24	K562	0.256272	1
MNT	HepG2	0.254789	1
ZKSCAN1	HepG2	0.253347	1
CEBPB	HeLa-S3	0.251091	1
CREB1	MCF-7	0.250282	1
ZKSCAN1	K562	0.247064	1
MAFK	HeLa-S3	0.245126	1
MAFK	MCF-7	0.243064	1
CEBPB	MCF-7	0.241595	1
MITF	K562	0.241491	1
HMBOX1	K562	0.235984	1
CUX1	K562	0.23332	1
SREBF1	MCF-7	0.226121	1
IRF3	HeLa-S3	0.22362	1
NFIB	MCF-7	0.220494	1
ATF3	K562	0.217776	1
NFE2L2	HepG2	0.214495	1
FOXA1	MCF-7	0.210233	1
FOXA3	K562	0.202887	1
ZKSCAN1	MCF-7	0.202354	1
FOS	MCF-7	0.202297	1
GATA3	MCF-7	0.201325	1
RFX1	MCF-7	0.199931	1
SRF	K562	0.19852	1
CEBPB	H1	0.194755	1
FOXO4	K562	0.193748	1
IRF1	K562	0.193184	1
ONECUT1	HepG2	0.19307	1
USF2	HeLa-S3	0.186676	1
ESR1	MCF-7	0.186616	1
TCF7L2	HeLa-S3	0.185436	1
RFX1	K562	0.183792	1
IRF9	K562	0.179529	1
MEF2D	K562	0.179388	1
USF1	H1	0.179021	1
JUN	HepG2	0.178254	1
NFE2	K562	0.17733	1
RFX5	HeLa-S3	0.176763	1
JUND	HepG2	0.169947	1
TCF7L2	MCF-7	0.16682	1
FOXA1	K562	0.164973	1
RBPJ	K562	0.164723	1
ZNF282	HepG2	0.162352	1
MAFK	H1	0.160263	1
BCL6	K562	0.158655	1
JUN	HeLa-S3	0.156827	1
ZNF24	HepG2	0.154678	1
IRF2	K562	0.154672	1
USF1	HepG2	0.154499	1
MAFK	K562	0.154397	1
FOXA2	HepG2	0.152282	1
SRF	MCF-7	0.150394	1
JUND	HeLa-S3	0.15011	1
NR2C2	HeLa-S3	0.148943	1
NEUROD1	MCF-7	0.148536	1
SREBF2	HeLa-S3	0.147745	1
NR2F2	MCF-7	0.147642	1
MEF2A	K562	0.147349	1
FOS	HeLa-S3	0.146353	1
NFATC3	K562	0.144855	1
FOSL1	K562	0.142533	1
NFYB	HeLa-S3	0.141675	1
ESRRB	K562	0.141612	1
SPI1	K562	0.141006	1
ISX	HepG2	0.140495	1
ZNF274	HepG2	0.139395	1
SRF	HepG2	0.137948	1
STAT3	HeLa-S3	0.137918	1
ZNF652	HepG2	0.13679	1
MAFG	HepG2	0.135335	1
ZBTB33	MCF-7	0.135306	1
REST	H1	0.135258	1
ZNF460	HepG2	0.133988	1
PKNOX1	K562	0.133785	1
PKNOX1	MCF-7	0.133541	1
CTCF	HeLa-S3	0.133041	1
NFIC	K562	0.132385	1
NFE2L1	K562	0.131755	1
NFE2L2	HeLa-S3	0.131256	1
LEF1	K562	0.131198	1
PRDM1	HeLa-S3	0.13059	1
IKZF1	K562	0.128665	1
MEIS2	K562	0.12799	1
GATA1	K562	0.127668	1
ESRRA	MCF-7	0.127572	1
ZNF24	MCF-7	0.127376	1
CEBPG	HepG2	0.125989	1
TEAD4	MCF-7	0.124164	1
USF2	K562	0.122961	1
CEBPA	HepG2	0.122353	1
FOSL2	MCF-7	0.121616	1
ESRRA	K562	0.119279	1
REST	HepG2	0.118947	1
MSX2	MCF-7	0.118511	1
NR2F1	K562	0.118354	1
USF2	HepG2	0.117104	1
TEAD1	K562	0.117077	1
NR4A1	K562	0.117023	1
MXI1	HeLa-S3	0.116595	1
NR3C1	K562	0.116494	1
RELA	K562	0.115842	1
MAX	HeLa-S3	0.115318	1
NFYA	HeLa-S3	0.115315	1
BACH1	H1	0.115207	1
FOXA1	HepG2	0.114862	1
NFE2	HepG2	0.114657	1
ZNF384	K562	0.114548	1
TEAD2	K562	0.114281	1
ELK3	K562	0.114135	1
FOSL2	HepG2	0.113895	1
ZNF317	HepG2	0.111257	1
NFIB	HepG2	0.110894	1
REST	MCF-7	0.110806	1
FOXK2	K562	0.109922	1
TFAP4	HepG2	0.109759	1
JUND	K562	0.10782	1
BCL6	HepG2	0.10757	1
TEAD4	K562	0.107174	1
NFIA	HepG2	0.106421	1
HSF2	HepG2	0.10569	1
JUND	MCF-7	0.105627	1
TP53	HepG2	0.105469	1
HNF4A	HepG2	0.1046	1
RFX7	K562	0.104437	1
GATA2	K562	0.10415	1
RORA	HepG2	0.10299	1
RARA	HepG2	0.102887	1
JUNB	K562	0.102779	1
NR5A1	HepG2	0.10227	1
TEAD4	H1	0.101617	1
BACH1	K562	0.101155	1
GABPA	HeLa-S3	0.100503	1
ATF7	K562	0.100382	1
MYC	HeLa-S3	0.100377	1
RUNX1	K562	0.100173	1
NR3C1	HepG2	0.0997718	1
ZKSCAN5	HepG2	0.099725	1
ONECUT2	HepG2	0.0994056	1
OVOL1	MCF-7	0.0984047	1
RFX1	HepG2	0.0981745	1
NR2F2	K562	0.098029	1
NFIL3	HepG2	0.0962203	1
MGA	K562	0.096218	1
TBX18	K562	0.0959047	1
KLF10	K562	0.0957796	1
USF1	K562	0.0956453	1
CTCF	MCF-7	0.0955777	1
CLOCK	MCF-7	0.0933289	1
ESRRA	HepG2	0.0914253	1
ZEB1	HepG2	0.0912746	1
NR2C1	K562	0.0910391	1
SMAD3	HepG2	0.0907537	1
E2F4	HeLa-S3	0.0905674	1
MEF2D	HepG2	0.0893294	1
ZSCAN29	K562	0.089121	1
JUN	K562	0.0888796	1
JUN	MCF-7	0.0886999	1
NR2F1	HepG2	0.0879755	1
PBX2	HepG2	0.0876205	1
TBX2	HepG2	0.0869812	1
MNT	MCF-7	0.0849533	1
MAX	HepG2	0.0846858	1
MYBL2	K562	0.0844641	1
JUND	H1	0.0843483	1
TFCP2	K562	0.0842955	1
PPARG	HepG2	0.0838165	1
GFI1	HepG2	0.0837396	1
MNX1	HepG2	0.0835687	1
NR2F2	HepG2	0.083008	1
GATA2	HepG2	0.0828954	1
BHLHE40	K562	0.082187	1
HNF4G	HepG2	0.0818297	1
NRL	HepG2	0.0812274	1
ZBTB26	HepG2	0.0811985	1
E2F1	HeLa-S3	0.0808985	1
FOXP1	HepG2	0.0808175	1
E2F3	K562	0.0807258	1
SMAD3	K562	0.0806631	1
ZNF384	HepG2	0.0804905	1
THRB	HepG2	0.0800089	1
SOX13	HepG2	0.0794697	1
SREBF2	K562	0.0794511	1
FOXA3	HepG2	0.0792539	1
USF2	H1	0.0791129	1
SMAD5	K562	0.0783842	1
MIXL1	HepG2	0.0782859	1
ETV1	K562	0.0780427	1
MAX	K562	0.0776116	1
RREB1	HepG2	0.077607	1
ZBTB12	K562	0.0772447	1
BHLHE40	HepG2	0.0770441	1
RFX5	MCF-7	0.0770291	1
ZNF263	HepG2	0.076918	1
TCF7	HepG2	0.0767303	1
TCF7L2	HepG2	0.0764894	1
IRF5	HepG2	0.0764352	1
TCF7	K562	0.0762571	1
TCFL5	K562	0.0759022	1
MEF2A	HepG2	0.0757403	1
TEAD4	HepG2	0.0757169	1
RXRB	HepG2	0.0752805	1
NFIC	HepG2	0.0752735	1
IRF1	HepG2	0.0747431	1
CEBPD	HepG2	0.0738953	1
PITX1	HepG2	0.0735753	1
GABPA	K562	0.0733333	1
CTCF	HepG2	0.0732221	1
ZNF143	HeLa-S3	0.0731652	1
NFATC3	HepG2	0.071755	1
ZBTB7B	HepG2	0.0705578	1
ISL2	HepG2	0.0704793	1
CTCF	H1	0.0704743	1
SNAI1	HepG2	0.0703711	1
E2F1	MCF-7	0.0700252	1
TGIF2	HepG2	0.0698723	1
HEY1	K562	0.0696752	1
CREB3	K562	0.0696357	1
PRDM4	HepG2	0.0695119	1
CLOCK	K562	0.0693337	1
GABPA	HepG2	0.0684549	1
TCF7L2	K562	0.0683465	1
ELK4	HeLa-S3	0.0681195	1
NFE2L1	HepG2	0.0676849	1
TEAD1	HepG2	0.0675506	1
DLX6	HepG2	0.0664561	1
ZBTB33	K562	0.0661371	1
RREB1	K562	0.0659123	1
RFX5	K562	0.0658214	1
RELA	HepG2	0.0655165	1
E2F6	HeLa-S3	0.0654493	1
FOS	K562	0.0651124	1
MNT	K562	0.0649244	1
NFYB	K562	0.0649111	1
HNF1A	HepG2	0.0646683	1
ZBTB7B	MCF-7	0.0645905	1
NR2C2	HepG2	0.0641851	1
ZSCAN29	HepG2	0.0641182	1
SIX1	HepG2	0.0640657	1
SREBF1	K562	0.0639188	1
TEF	HepG2	0.0638779	1
ATF6	HepG2	0.0638092	1
ETV6	K562	0.0636883	1
NFKB2	HepG2	0.0636589	1
ELF3	HepG2	0.0631333	1
ZNF282	K562	0.0630777	1
MLX	K562	0.0630269	1
TBX3	HepG2	0.0627345	1
MEIS2	HepG2	0.0627127	1
SOX18	HepG2	0.0624122	1
TCF3	K562	0.0623326	1
GATA4	HepG2	0.0623047	1
MEIS1	HepG2	0.0618115	1
KLF4	MCF-7	0.0612255	1
RFX3	HepG2	0.0611555	1
ELF1	K562	0.0610331	1
NRF1	HeLa-S3	0.0610214	1
HOXA5	HepG2	0.0607332	1
MXI1	K562	0.0604579	1
MYC	MCF-7	0.059621	1
ETV4	HepG2	0.0595137	1
NFYC	HepG2	0.0594427	1
RBPJ	HepG2	0.0591972	1
REST	K562	0.0591779	1
MYBL2	HepG2	0.0583238	1
E2F8	K562	0.0583227	1
ELK1	HeLa-S3	0.0581464	1
ATF4	HepG2	0.05814	1
HNF1B	HepG2	0.0577149	1
FOXK1	HepG2	0.0575036	1
MXI1	HepG2	0.0573972	1
IRF2	HepG2	0.0573342	1
MAZ	HeLa-S3	0.0572344	1
HSF1	MCF-7	0.0564611	1
FOSL1	HepG2	0.0562896	1
NEUROD1	K562	0.0558316	1
SPDEF	MCF-7	0.0557126	1
NFYA	K562	0.0556733	1
CREB1	K562	0.0556293	1
ELF1	HepG2	0.0551765	1
CREM	K562	0.0549073	1
ZNF143	K562	0.0548191	1
ELF1	MCF-7	0.0543512	1
KLF13	HepG2	0.0541672	1
NR2C2	K562	0.0541597	1
GABPA	MCF-7	0.0535003	1
E2F7	K562	0.0533716	1
ZBED1	K562	0.0529895	1
TEAD2	HepG2	0.0529184	1
MAX	MCF-7	0.0523464	1
FOXK2	HepG2	0.0523158	1
MAX	H1	0.0519945	1
TCF3	HepG2	0.051777	1
THAP11	HepG2	0.0511439	1
HES1	MCF-7	0.0510717	1
CTCF	K562	0.0499384	1
ELF4	K562	0.0493953	1
CREB3L1	K562	0.0492238	1
KLF6	K562	0.048995	1
HES1	K562	0.0489598	1
MYC	HepG2	0.0485535	1
ZNF143	HepG2	0.048272	1
KLF9	MCF-7	0.0481582	1
ZNF740	HepG2	0.0477487	1
EGR1	MCF-7	0.0462592	1
LBX2	HepG2	0.046085	1
NFYB	HepG2	0.0459927	1
MYC	K562	0.0452994	1
ATF6	K562	0.0448996	1
E2F1	K562	0.0448728	1
HINFP	K562	0.044052	1
FOXK2	MCF-7	0.0439467	1
YY1	K562	0.0427082	1
ATF2	H1	0.0420548	1
ATF3	H1	0.0420189	1
KLF16	K562	0.0418897	1
MLX	HepG2	0.04187	1
RFX5	HepG2	0.041743	1
TFE3	HepG2	0.0406961	1
XBP1	HepG2	0.0404941	1
NKX3-1	HepG2	0.0399084	1
ETS2	K562	0.0398481	1
ZNF263	K562	0.0395514	1
MYC	H1	0.0394318	1
E2F4	K562	0.0392741	1
YY1	H1	0.0390623	1
HINFP	HepG2	0.038736	1
MAZ	MCF-7	0.0386807	1
MTF1	HepG2	0.0385757	1
POU5F1	H1	0.0381306	1
POU5F1	K562	0.038045	1
ZBTB33	HepG2	0.0380258	1
ERF	K562	0.0377828	1
E2F6	H1	0.0375168	1
EGR1	HepG2	0.0371984	1
ZNF143	H1	0.0366682	1
KLF13	K562	0.0364397	1
ZBTB7A	HepG2	0.0363969	1
KLF16	HepG2	0.036077	1
CREB1	H1	0.0358648	1
ETV5	K562	0.0358273	1
ATF3	HepG2	0.0356077	1
MAZ	HepG2	0.0347952	1
E2F4	MCF-7	0.0347399	1
KLF6	HepG2	0.0338121	1
KLF9	HepG2	0.0336881	1
KLF11	HepG2	0.0335565	1
EGR1	K562	0.0331209	1
CREM	HepG2	0.0329557	1
NFYA	HepG2	0.0329051	1
ELF2	K562	0.0328039	1
E2F8	MCF-7	0.0320518	1
ETV5	HepG2	0.0315175	1
E2F2	HepG2	0.0305998	1
E2F1	HepG2	0.0304258	1
MXI1	H1	0.0301042	1
ELK1	K562	0.0296793	1
RFX5	H1	0.0292984	1
CREB3	HepG2	0.0292264	1
THAP1	K562	0.0290159	1
ETS1	K562	0.0286514	1
E2F4	HepG2	0.0282889	1
TFDP1	K562	0.0279844	1
TFDP1	HepG2	0.0278123	1
ELF4	HepG2	0.0276414	1
ZBTB7A	K562	0.0275947	1
JUN	H1	0.0274582	1
VEZF1	K562	0.0274516	1
EGR1	H1	0.0272457	1
ZNF148	K562	0.0269724	1
ERF	HepG2	0.0269392	1
ETV6	HepG2	0.0259946	1
SP2	K562	0.0259677	1
YY1	HepG2	0.0258087	1
ZNF740	K562	0.0255746	1
MAZ	K562	0.0255534	1
SP2	HepG2	0.0253982	1
ZBTB14	HepG2	0.0251489	1
NRF1	K562	0.0250423	1
DBP	HepG2	0.02487	1
E2F6	K562	0.0244742	1
ETS1	HepG2	0.0240608	1
SP1	K562	0.0235494	1
CTCFL	K562	0.0233946	1
NRF1	HepG2	0.0229615	1
SP1	MCF-7	0.0229467	1
SP1	H1	0.0226267	1
GABPA	H1	0.0202626	1
SP1	HepG2	0.0184706	1
SP2	H1	0.0180451	1
ELK1	HepG2	0.0173274	1
NRF1	H1	0.016504	1
ELK4	HepG2	0.016058	1
SP4	H1	0.0160443	1
NRF1	MCF-7	0.0146589	1
IRF3	HepG2	0.0142531	1
ELK1	MCF-7	0.013842	1
GMEB2	HepG2	0.0122169	1
FOSL1	H1	0.00923997	1

## Sheet: Sheet2
TF_name	Cell line	Enrichment score	p_value	expression_level
ATF2	HepG2	0.645909	1	35.353
ATF2	K562	0.433553	1	49.266
ATF4	HepG2	0.05814	1	688.821
ATF4	K562	0.460413	1	374.613
ATF6	HepG2	0.0638092	1	14.802
ATF6	K562	0.0448996	1	28.37
ATF7	HepG2	0.58907	1	11.257
ATF7	K562	0.100382	1	11.579
BACH1	K562	0.101155	1	21.378
BCL6	HepG2	0.10757	1	28.63
BHLHE40	HepG2	0.0770441	1	54.447
BHLHE40	K562	0.082187	1	76.397
CEBPA	HepG2	0.122353	1	33.365
CEBPB	H1	0.194755	1	13.881
CEBPB	HeLa-S3	0.251091	1	29.704
CEBPB	HepG2	0.258225	1	42.833
CEBPB	K562	0.474904	1	10.532
CEBPD	HepG2	0.0738953	1	26.114
CEBPG	HepG2	0.125989	1	31.207
CEBPG	K562	0.516561	1	33.139
CREB1	H1	0.0358648	1	10.351
CREB3	HepG2	0.0292264	1	11.7
CTCF	H1	0.0704743	1	30.656
CTCF	HeLa-S3	0.133041	1	41.445
CTCF	HepG2	0.0732221	1	18.7
CTCF	K562	0.0499384	1	24.774
CTCFL	K562	0.0233946	1	83.547
E2F1	HeLa-S3	0.0808985	1	58.356
E2F1	HepG2	0.0304258	1	27.397
E2F1	K562	0.0448728	1	17.021
E2F3	K562	0.0807258	1	26.641
E2F4	HeLa-S3	0.0905674	1	49.196
E2F4	HepG2	0.0282889	1	85.897
E2F4	K562	0.0392741	1	78.737
E2F6	HeLa-S3	0.0654493	1	16.479
E2F6	K562	0.0244742	1	12.191
EGR1	K562	0.0331209	1	11.191
ELF1	HepG2	0.0551765	1	13.542
ELF1	K562	0.0610331	1	21.775
ELF2	K562	0.0328039	1	15.143
ELF3	HepG2	0.0631333	1	14.166
ELF4	K562	0.0493953	1	30.148
ELK1	HeLa-S3	0.0581464	1	10.551
ELK1	K562	0.0296793	1	17.99
ELK4	HeLa-S3	0.0681195	1	15.617
ERF	HepG2	0.0269392	1	32.201
ERF	K562	0.0377828	1	16.025
ESRRA	HepG2	0.0914253	1	16.104
ESRRA	K562	0.119279	1	21.409
ESRRB	K562	0.141612	1	11.625
ETV4	HepG2	0.0595137	1	269.717
ETV5	HepG2	0.0315175	1	32.326
FOS	HeLa-S3	0.146353	1	11.02
FOSL2	HepG2	0.113895	1	19.26
FOXA1	HepG2	0.114862	1	32.379
FOXA2	HepG2	0.152282	1	10.875
FOXA3	HepG2	0.0792539	1	57.199
FOXA3	K562	0.202887	1	12.738
FOXK2	HepG2	0.0523158	1	47.11
FOXK2	K562	0.109922	1	22.638
GABPA	HeLa-S3	0.100503	1	22.767
GABPA	K562	0.0733333	1	15.273
GATA1	K562	0.127668	1	125.155
GATA2	K562	0.10415	1	18.362
GATA4	HepG2	0.0623047	1	13.418
GMEB2	HepG2	0.0122169	1	11.139
HLF	HepG2	0.313731	1	180.956
HMBOX1	K562	0.235984	1	27.414
HNF4A	HepG2	0.1046	1	72.693
HSF2	HepG2	0.10569	1	14.172
IKZF1	K562	0.128665	1	14.525
IRF2	HepG2	0.0573342	1	21.134
IRF3	HeLa-S3	0.22362	1	23.491
IRF3	HepG2	0.0142531	1	33.272
JUN	HepG2	0.178254	1	28.156
JUNB	K562	0.102779	1	19.137
JUND	H1	0.0843483	1	46.684
JUND	HeLa-S3	0.15011	1	14.063
JUND	HepG2	0.169947	1	46.019
JUND	K562	0.10782	1	41.064
KLF6	HepG2	0.0338121	1	38.078
LEF1	K562	0.131198	1	13.493
MAFF	HepG2	0.494471	1	13.95
MAFG	HepG2	0.135335	1	21.655
MAFG	K562	0.355733	1	26.117
MAX	H1	0.0519945	1	12.441
MAX	HeLa-S3	0.115318	1	18.096
MAX	HepG2	0.0846858	1	12.946
MAX	K562	0.0776116	1	22.247
MAZ	HeLa-S3	0.0572344	1	45.276
MAZ	HepG2	0.0347952	1	80.09
MAZ	K562	0.0255534	1	76.867
MEF2A	HepG2	0.0757403	1	14.559
MGA	K562	0.096218	1	11.829
MLX	HepG2	0.04187	1	61.019
MLX	K562	0.0630269	1	37.419
MXI1	HeLa-S3	0.116595	1	11.481
MXI1	HepG2	0.0573972	1	13.788
MXI1	K562	0.0604579	1	13.548
MYBL2	HepG2	0.0583238	1	11.413
MYBL2	K562	0.0844641	1	31.959
MYC	H1	0.0394318	1	47.639
MYC	HeLa-S3	0.100377	1	141.813
MYC	HepG2	0.0485535	1	62.761
MYC	K562	0.0452994	1	87.278
NFATC3	HepG2	0.071755	1	41.535
NFATC3	K562	0.144855	1	56.333
NFE2	K562	0.17733	1	143.183
NFE2L1	HepG2	0.0676849	1	148.277
NFE2L1	K562	0.131755	1	28.465
NFE2L2	HeLa-S3	0.131256	1	87.549
NFE2L2	HepG2	0.214495	1	75.313
NFIL3	HepG2	0.0962203	1	51.022
NFKB2	HepG2	0.0636589	1	11.14
NFYA	HeLa-S3	0.115315	1	12.506
NFYA	HepG2	0.0329051	1	10.116
NFYA	K562	0.0556733	1	15.622
NFYB	HeLa-S3	0.141675	1	21.263
NFYB	K562	0.0649111	1	12.34
NFYC	HepG2	0.0594427	1	18.392
NR2C1	K562	0.0910391	1	12.955
NR2F1	HepG2	0.0879755	1	28.148
NR5A1	HepG2	0.10227	1	28.131
NRF1	K562	0.0250423	1	12.513
PBX2	HepG2	0.0876205	1	37.774
PBX2	K562	0.26796	1	49.678
POU5F1	H1	0.0381306	1	182.963
PPARG	HepG2	0.0838165	1	26.049
RBPJ	HepG2	0.0591972	1	14.793
RBPJ	K562	0.164723	1	22.697
RELA	HepG2	0.0655165	1	17.299
REST	H1	0.135258	1	17.977
REST	HeLa-S3	0.262062	1	18.564
REST	K562	0.0591779	1	11.52
RFX5	H1	0.0292984	1	15.763
RFX5	HeLa-S3	0.176763	1	57.071
RFX5	K562	0.0658214	1	17.872
RXRB	HepG2	0.0752805	1	34.145
SMAD3	HepG2	0.0907537	1	22.824
SP1	H1	0.0226267	1	20.044
SP1	HepG2	0.0184706	1	18.184
SP1	K562	0.0235494	1	37.404
SPI1	K562	0.141006	1	12.521
SREBF1	K562	0.0639188	1	20.77
SREBF2	HeLa-S3	0.147745	1	23.51
SREBF2	K562	0.0794511	1	42.778
SRF	H1	0.304279	1	28.779
SRF	HepG2	0.137948	1	51.26
SRF	K562	0.19852	1	28.712
STAT3	HeLa-S3	0.137918	1	25.535
TBX18	K562	0.0959047	1	16.86
TBX3	HepG2	0.0627345	1	17.534
TCF3	HepG2	0.051777	1	26.145
TCF3	K562	0.0623326	1	27.432
TEAD1	HepG2	0.0675506	1	13.307
TEAD4	H1	0.101617	1	43.986
TEAD4	HepG2	0.0757169	1	51.057
TEAD4	K562	0.107174	1	13.974
TFCP2	K562	0.0842955	1	25.179
TFDP1	HepG2	0.0278123	1	21.553
TFDP1	K562	0.0279844	1	50.457
TGIF2	HepG2	0.0698723	1	42.89
THAP11	HepG2	0.0511439	1	54.116
USF1	H1	0.179021	1	15.905
USF1	HepG2	0.154499	1	16.612
USF1	K562	0.0956453	1	27.842
USF2	H1	0.0791129	1	52.655
USF2	HeLa-S3	0.186676	1	34.928
USF2	HepG2	0.117104	1	74.787
USF2	K562	0.122961	1	36.013
VEZF1	K562	0.0274516	1	12.179
XBP1	HepG2	0.0404941	1	237.334
YY1	H1	0.0390623	1	34.797
YY1	HepG2	0.0258087	1	16.884
YY1	K562	0.0427082	1	18.178
ZBTB33	K562	0.0661371	1	14.011
ZBTB7B	HepG2	0.0705578	1	14.957
ZKSCAN1	HeLa-S3	0.363925	1	14.094
ZKSCAN1	HepG2	0.253347	1	49.981
ZKSCAN1	K562	0.247064	1	29.789
ZNF143	HeLa-S3	0.0731652	1	13.492
ZNF143	HepG2	0.048272	1	10.193
ZNF143	K562	0.0548191	1	16.694
ZNF24	HepG2	0.154678	1	19.304
ZNF24	K562	0.256272	1	53.337
ZNF274	HeLa-S3	5.4033	4.65012e-12	13.841
ZNF274	HepG2	0.139395	1	15.374
ZNF274	K562	1.34756	7.00145e-07	27.038
ZNF282	HepG2	0.162352	1	11.458
ZNF282	K562	0.0630777	1	17.681
ZNF384	HepG2	0.0804905	1	20.804
ZNF384	K562	0.114548	1	15.235
ZNF460	HepG2	0.133988	1	12.671
ZNF740	HepG2	0.0477487	1	12.53
ZNF740	K562	0.0255746	1	19.283
