# Supplementary material for: Detection of new pioneer transcription factors as cell-type-specific nucleosome binders
Source: eLife. 2024 Jan 31;12:RP88936. doi: 10.7554/eLife.88936 (PMC10945518; doi:10.7554/eLife.88936)
Supplement: Figure 2—figure supplement 3—source data 1. [file elife-88936-fig2-figsupp3-data1.xlsx]

## Sheet: HeLa-S3
TF_name	Cell line	Enrichment Score	p_value	qvalues
ATF2	H1	0.564551	1	1
ATF2	HepG2	0.904118	1	1
ATF2	K562	0.927529	0.999985	1
ATF3	H1	0.315012	1	1
ATF3	HepG2	0.269493	1	1
ATF3	K562	0.701163	1	1
ATF4	HepG2	0.603834	1	1
ATF4	K562	1.14559	6.5124e-11	6.09375e-10
ATF6	HepG2	0.175696	1	1
ATF6	K562	0.0571058	1	1
ATF7	HepG2	0.712264	1	1
ATF7	K562	0.516707	1	1
ATF7	MCF-7	0.442188	1	1
BACH1	H1	0.59631	1	1
BACH1	K562	0.561435	1	1
BCL6	HepG2	1.32494	1.20722e-28	1.58146e-27
BCL6	K562	0.991553	0.550538	1
BHLHE40	HepG2	0.471411	1	1
BHLHE40	K562	0.48757	1	1
CEBPA	HepG2	1.41188	2.56626e-77	5.04269e-76
CEBPB	H1	0.67027	1	1
CEBPB	HepG2	0.953585	0.98031	1
CEBPB	K562	1.00002	0.5038	1
CEBPB	MCF-7	0.626079	1	1
CEBPD	HepG2	1.02705	0.16635	0.895554
CEBPG	HepG2	0.99613	0.565181	1
CEBPG	K562	0.817685	1	1
CEBPG	MCF-7	0.719335	1	1
CLOCK	K562	1.02236	0.472288	1
CLOCK	MCF-7	0.33455	1	1
CREB1	H1	0.271322	1	1
CREB1	HepG2	0.550022	1	1
CREB1	K562	0.486728	1	1
CREB1	MCF-7	0.380094	1	1
CREB3	HepG2	0.124348	1	1
CREB3	K562	0.648793	1	1
CREB3L1	K562	0.288715	1	1
CREM	HepG2	0.223835	1	1
CREM	K562	0.325421	1	1
CTCF	H1	0.437442	1	1
CTCF	HepG2	0.219275	1	1
CTCF	K562	0.153917	1	1
CTCF	MCF-7	0.258653	1	1
CTCFL	K562	0.119336	1	1
CUX1	K562	1.18677	0.0116351	0.0692818
CUX1	MCF-7	0.698032	0.999978	1
DBP	HepG2	0.691083	0.992536	1
DLX6	HepG2	0.63837	1	1
E2F1	HepG2	0.082312	1	1
E2F1	K562	0.155934	1	1
E2F1	MCF-7	0.227103	1	1
E2F2	HepG2	0.095432	1	1
E2F3	K562	0.285219	1	1
E2F4	HepG2	0.111299	1	1
E2F4	K562	0.0209558	1	1
E2F4	MCF-7	0.0119362	1	1
E2F6	H1	0.409785	1	1
E2F6	K562	0.111841	1	1
E2F7	K562	0.119048	1	1
E2F8	K562	0.191769	1	1
E2F8	MCF-7	0.0472747	1	1
EGR1	H1	0.255228	1	1
EGR1	HepG2	0.150369	1	1
EGR1	K562	0.187822	1	1
EGR1	MCF-7	0.107689	1	1
ELF1	HepG2	0.380861	1	1
ELF1	K562	0.437678	1	1
ELF1	MCF-7	0.176844	1	1
ELF2	K562	0.0873374	1	1
ELF3	HepG2	0.554047	1	1
ELF4	HepG2	0.101131	1	1
ELF4	K562	0.294122	1	1
ELK1	HepG2	0.0443036	1	1
ELK1	K562	0.0274087	1	1
ELK1	MCF-7	0.0156518	1	1
ELK3	K562	0.468581	0.987697	1
ELK4	HepG2	0.0143374	1	1
ERF	HepG2	0.168727	1	1
ERF	K562	0.191682	1	1
ESR1	MCF-7	0.526424	1	1
ESRRA	HepG2	1.38297	1.0572e-33	1.48385e-32
ESRRA	K562	0.786085	1	1
ESRRA	MCF-7	0.485011	1	1
ESRRB	K562	1.40575	0.292553	1
ETS1	HepG2	0.1078	1	1
ETS1	K562	0.100418	1	1
ETS2	K562	0.17331	1	1
ETV1	K562	0.61241	1	1
ETV4	HepG2	0.643109	1	1
ETV5	HepG2	0.180736	1	1
ETV5	K562	0.16914	1	1
ETV6	HepG2	0.0917185	1	1
ETV6	K562	0.480637	1	1
FOS	K562	0.169883	1	1
FOS	MCF-7	0.365613	1	1
FOSL1	H1	0.0296482	1	1
FOSL1	HepG2	0.211032	1	1
FOSL1	K562	0.484527	1	1
FOSL2	HepG2	0.395964	1	1
FOSL2	MCF-7	0.204933	1	1
FOXA1	HepG2	1.94582	0	0
FOXA1	K562	1.11328	0.208903	1
FOXA1	MCF-7	1.70067	2.87245e-82	5.94144e-81
FOXA2	HepG2	1.72104	1.7066e-236	7.45215e-235
FOXA3	HepG2	1.65127	8.58575e-118	2.81183e-116
FOXA3	K562	1.28548	2.62863e-10	2.34784e-09
FOXK1	HepG2	1.27588	1.41191e-13	1.54134e-12
FOXK2	HepG2	0.969831	0.750844	1
FOXK2	K562	0.917149	0.998477	1
FOXK2	MCF-7	0.148746	1	1
FOXO4	K562	1.40575	0.194996	1
FOXP1	HepG2	1.80111	9.57573e-116	2.89482e-114
GABPA	H1	0.0971286	1	1
GABPA	HepG2	0.43273	1	1
GABPA	K562	0.492777	1	1
GABPA	MCF-7	0.104245	1	1
GATA1	K562	4.11668	5.21296e-220	2.04869e-218
GATA2	HepG2	1.7659	1.38777e-56	2.37128e-55
GATA2	K562	3.34297	0	0
GATA3	MCF-7	0.969909	0.764692	1
GATA4	HepG2	1.89149	5.03415e-26	6.18257e-25
GFI1	HepG2	1.25048	5.19621e-13	5.51922e-12
GMEB2	HepG2	0.0861059	1	1
HES1	K562	0.287217	1	1
HES1	MCF-7	0.0956815	1	1
HEY1	K562	0.712771	0.962128	1
HINFP	HepG2	0.0815692	1	1
HINFP	K562	0.146397	1	1
HLF	HepG2	1.14107	2.78384e-17	3.12586e-16
HMBOX1	K562	1.29379	2.28052e-08	1.79249e-07
HNF1A	HepG2	2.69289	0	0
HNF1B	HepG2	1.9788	2.47771e-88	5.72789e-87
HNF4A	HepG2	3.11993	0	0
HNF4G	HepG2	2.6983	0	0
HOXA5	HepG2	0.611625	0.999999	1
HSF1	MCF-7	0.192602	1	1
HSF2	HepG2	0.987343	0.638154	1
IKZF1	HepG2	3.04547	6.01324e-05	0.000414597
IKZF1	K562	1.10884	8.11216e-13	8.38968e-12
IRF1	HepG2	0.482943	1	1
IRF1	K562	1.07066	1.64109e-05	0.000119435
IRF2	HepG2	0.442188	1	1
IRF2	K562	0.533279	1	1
IRF5	HepG2	0.333089	1	1
IRF9	K562	1.47976	1.32446e-09	1.10747e-08
ISL2	HepG2	1.18122	0.0123086	0.0721982
ISX	HepG2	0.63447	0.961768	1
JUN	H1	0.24184	1	1
JUN	HepG2	0.6206	1	1
JUN	K562	0.476459	1	1
JUN	MCF-7	0.142337	1	1
JUNB	K562	0.314228	1	1
JUND	H1	0.605553	1	1
JUND	HepG2	0.312188	1	1
JUND	K562	0.431118	1	1
JUND	MCF-7	0.147534	1	1
KLF10	K562	1.0509	0.398272	1
KLF11	HepG2	0.114125	1	1
KLF13	HepG2	0.151014	1	1
KLF13	K562	0.224325	1	1
KLF16	HepG2	0.162761	1	1
KLF16	K562	0.346917	1	1
KLF4	MCF-7	0.168863	1	1
KLF6	HepG2	0.118214	1	1
KLF6	K562	0.225431	1	1
KLF9	HepG2	0.134378	1	1
KLF9	MCF-7	0.0813182	1	1
LBX2	HepG2	0.0761361	1	1
LEF1	K562	1.89751	8.11714e-84	1.77224e-82
MAFF	HepG2	0.885382	1	1
MAFF	K562	0.929533	0.995362	1
MAFG	HepG2	0.613622	1	1
MAFG	K562	1.01158	0.291292	1
MAFK	H1	0.809588	0.999596	1
MAFK	HepG2	0.57801	1	1
MAFK	K562	0.578738	1	1
MAFK	MCF-7	0.402939	1	1
MAX	H1	0.529642	1	1
MAX	HepG2	0.661255	1	1
MAX	K562	0.539216	1	1
MAX	MCF-7	0.149448	1	1
MAZ	HepG2	0.128066	1	1
MAZ	K562	0.138788	1	1
MAZ	MCF-7	0.0639829	1	1
MEF2A	HepG2	1.18529	0.000431807	0.00278197
MEF2A	K562	1.74013	7.41286e-38	1.12048e-36
MEF2D	HepG2	1.17777	1.99105e-05	0.000142269
MEF2D	K562	1.51108	5.55857e-23	6.61975e-22
MEIS1	HepG2	0.523056	1	1
MEIS2	HepG2	0.742132	1	1
MEIS2	K562	1.07706	0.00917201	0.0554554
MGA	K562	0.827513	1	1
MITF	K562	0.838669	1	1
MIXL1	HepG2	0.908874	0.962225	1
MLX	HepG2	0.376276	1	1
MNT	HepG2	0.555933	1	1
MNT	K562	0.478018	1	1
MNT	MCF-7	0.261254	1	1
MNX1	HepG2	0.772946	0.999299	1
MSX2	MCF-7	0.35699	1	1
MTF1	HepG2	0.319601	1	1
MXI1	H1	0.317063	1	1
MXI1	HepG2	0.488972	1	1
MXI1	K562	0.756406	0.999986	1
MYBL2	HepG2	0.483855	1	1
MYBL2	K562	0.77832	0.980786	1
MYC	H1	0.347168	1	1
MYC	HepG2	0.302962	1	1
MYC	K562	0.28879	1	1
MYC	MCF-7	0.157771	1	1
NEUROD1	K562	0.313081	1	1
NEUROD1	MCF-7	1.04232	0.400501	1
NFATC3	HepG2	0.417412	1	1
NFATC3	K562	1.24322	9.44759e-05	0.000640156
NFE2	HepG2	0.369989	1	1
NFE2	K562	0.443277	1	1
NFE2L1	HepG2	0.214834	1	1
NFE2L1	K562	0.461296	1	1
NFE2L2	HepG2	0.461993	1	1
NFIA	HepG2	1.27288	2.10257e-08	1.68634e-07
NFIB	HepG2	0.622468	1	1
NFIB	MCF-7	0.446226	1	1
NFIC	HepG2	1.27544	3.45618e-06	2.56279e-05
NFIC	K562	0.735538	1	1
NFIL3	HepG2	1.09309	0.000209593	0.0013961
NFIX	K562	0.937163	0.710701	1
NFKB2	HepG2	0.267732	1	1
NFYA	HepG2	0.230294	1	1
NFYA	K562	0.318033	1	1
NFYB	HepG2	0.175259	1	1
NFYB	K562	0.387129	1	1
NFYC	HepG2	0.321194	1	1
NKX3-1	HepG2	0.514625	0.999898	1
NR2C1	K562	0.794533	1	1
NR2C2	HepG2	0.541647	1	1
NR2C2	K562	0.328668	1	1
NR2F1	HepG2	1.23721	7.6198e-27	9.65994e-26
NR2F1	K562	0.866679	1	1
NR2F2	HepG2	2.04906	1.25134e-96	3.5127e-95
NR2F2	K562	1.26522	2.49119e-12	2.44759e-11
NR2F2	MCF-7	0.745433	1	1
NR3C1	HepG2	0.761364	0.853884	1
NR3C1	K562	0.535521	0.999364	1
NR4A1	K562	1.2946	1.04086e-09	9.09022e-09
NR5A1	HepG2	1.82522	1.63316e-180	5.83485e-179
NRF1	H1	0.11183	1	1
NRF1	HepG2	0.0635441	1	1
NRF1	K562	0.0873318	1	1
NRF1	MCF-7	0.0221499	1	1
NRL	HepG2	0.449174	1	1
ONECUT1	HepG2	1.44618	4.12242e-89	1.01257e-87
ONECUT2	HepG2	1.99003	1.10505e-65	1.97403e-64
OVOL1	MCF-7	0.21958	1	1
PBX2	HepG2	2.56963	1.03786e-12	1.04584e-11
PBX2	K562	1.39659	2.7532e-31	3.73106e-30
PITX1	HepG2	1.08312	0.0217753	0.124025
PKNOX1	K562	0.88894	1	1
PKNOX1	MCF-7	0.436177	1	1
POU5F1	H1	8.44715	5.18879e-68	9.71044e-67
PPARG	HepG2	1.31256	9.39327e-19	1.08575e-17
PRDM4	HepG2	0.152755	1	1
RARA	HepG2	2.01845	1.1585e-244	5.69113e-243
RBPJ	HepG2	0.508551	1	1
RBPJ	K562	1.34593	0.00814509	0.050016
RELA	HepG2	0.449769	1	1
RELA	K562	0.882033	0.956594	1
REST	H1	0.66062	1	1
REST	HepG2	0.395545	1	1
REST	K562	0.24686	1	1
REST	MCF-7	0.273267	1	1
RFX1	HepG2	0.340292	1	1
RFX1	K562	0.634208	1	1
RFX1	MCF-7	0.541653	1	1
RFX3	HepG2	0.291432	1	1
RFX5	H1	0.452139	1	1
RFX5	HepG2	0.23006	1	1
RFX5	K562	0.33337	1	1
RFX5	MCF-7	0.208137	1	1
RFX7	K562	1.87433	0.0301292	0.166771
RORA	HepG2	2.45814	3.20583e-08	2.47038e-07
RREB1	HepG2	0.857353	1	1
RREB1	K562	0.587423	1	1
RUNX1	K562	1.36069	8.72446e-07	6.59368e-06
RXRB	HepG2	1.37229	1.44938e-42	2.37337e-41
SIX1	HepG2	0.706678	1	1
SMAD3	HepG2	1.05919	0.275998	1
SMAD3	K562	0.697062	0.991782	1
SMAD5	K562	0.318274	1	1
SNAI1	HepG2	0.511103	1	1
SOX13	HepG2	1.82148	2.06995e-89	5.42327e-88
SOX18	HepG2	0.376497	1	1
SP1	H1	0.316769	1	1
SP1	HepG2	0.0714446	1	1
SP1	K562	0.064866	1	1
SP1	MCF-7	0.0345228	1	1
SP2	H1	0.129115	1	1
SP2	HepG2	0.0559869	1	1
SP2	K562	0.0670282	1	1
SP4	H1	0.113707	1	1
SPDEF	MCF-7	0.198474	1	1
SPI1	K562	0.817989	1	1
SREBF1	K562	0.454045	1	1
SREBF1	MCF-7	0.51804	1	1
SREBF2	K562	0.575077	0.995429	1
SRF	H1	1.8997	1.17509e-09	1.00393e-08
SRF	HepG2	0.840844	0.999987	1
SRF	K562	1.26208	2.58225e-11	2.47518e-10
SRF	MCF-7	0.518147	1	1
TBX18	K562	1.24747	0.00197136	0.0124959
TBX2	HepG2	1.13293	4.79909e-05	0.000336794
TBX3	HepG2	0.787816	0.99998	1
TCF3	HepG2	0.147848	1	1
TCF3	K562	0.597025	1	1
TCF7	HepG2	3.19844	7.18871e-299	4.03595e-297
TCF7	K562	1.11127	0.0616029	0.336249
TCF7L2	HepG2	2.664	0	0
TCF7L2	K562	0.996124	0.534112	1
TCF7L2	MCF-7	1.08951	0.0226272	0.127035
TEAD1	HepG2	0.758888	1	1
TEAD1	K562	0.847534	0.99967	1
TEAD2	HepG2	0.333678	1	1
TEAD2	K562	0.460149	1	1
TEAD4	H1	1.8202	6.95178e-38	1.09282e-36
TEAD4	HepG2	0.78557	1	1
TEAD4	K562	0.904193	0.999302	1
TEAD4	MCF-7	0.733536	1	1
TEF	HepG2	0.673113	1	1
TFAP4	HepG2	1.22246	3.90999e-35	5.69121e-34
TFCP2	K562	0.38199	1	1
TFDP1	HepG2	0.0764081	1	1
TFDP1	K562	0.0840795	1	1
TFE3	HepG2	0.327074	1	1
TFE3	K562	0.715143	1	1
TGIF2	HepG2	0.556924	1	1
THAP1	K562	0.0725498	1	1
THAP11	HepG2	0.263741	1	1
THRB	HepG2	1.12652	0.00029947	0.00196153
TP53	HepG2	0.730299	1	1
USF1	H1	0.66211	1	1
USF1	HepG2	0.730854	1	1
USF1	K562	0.72536	1	1
USF2	H1	0.420629	1	1
USF2	HepG2	0.447774	1	1
USF2	K562	0.751882	1	1
VEZF1	K562	0.230504	1	1
XBP1	HepG2	0.092327	1	1
YY1	H1	0.367842	1	1
YY1	HepG2	0.125728	1	1
YY1	K562	0.251832	1	1
ZBED1	K562	0.117143	1	1
ZBTB12	K562	0.478017	1	1
ZBTB14	HepG2	0.0536845	1	1
ZBTB26	HepG2	0.826249	1	1
ZBTB33	HepG2	0.143193	1	1
ZBTB33	K562	0.201338	1	1
ZBTB33	MCF-7	0.176823	1	1
ZBTB7A	HepG2	0.217531	1	1
ZBTB7A	K562	0.128822	1	1
ZBTB7B	HepG2	0.445632	1	1
ZBTB7B	MCF-7	0.115701	1	1
ZEB1	HepG2	0.972057	0.804679	1
ZKSCAN1	HepG2	1.00694	0.460883	1
ZKSCAN1	K562	0.75782	1	1
ZKSCAN1	MCF-7	0.52219	1	1
ZKSCAN5	HepG2	0.838966	1	1
ZNF143	H1	0.199075	1	1
ZNF143	HepG2	0.226608	1	1
ZNF143	K562	0.191881	1	1
ZNF148	K562	0.183459	1	1
ZNF24	HepG2	0.767292	1	1
ZNF24	K562	0.969812	0.987209	1
ZNF24	MCF-7	0.209997	1	1
ZNF263	HepG2	0.394985	1	1
ZNF263	K562	0.236218	1	1
ZNF274	HepG2	0.401323	1	1
ZNF274	K562	2.1392	6.57591e-09	5.38403e-08
ZNF282	K562	0.514758	1	1
ZNF317	HepG2	1.1013	0.00257262	0.0160483
ZNF384	HepG2	0.680021	1	1
ZNF384	K562	0.646143	1	1
ZNF460	HepG2	0.974028	0.979277	1
ZNF652	HepG2	0.993327	0.584499	1
ZNF740	HepG2	0.237687	1	1
ZNF740	K562	0.176529	1	1
ZSCAN29	HepG2	0.446823	1	1
ZSCAN29	K562	0.512202	1	1

## Sheet: HepG2
TF_name	cell_line	Enrichment Score	p_value	qvalues
ATF2	H1	0.514431	1	1
ATF2	K562	1.06595	0.000120771	0.000838868
ATF3	H1	0.294929	1	1
ATF3	K562	0.891559	1	1
ATF4	K562	1.26009	2.83061e-30	5.59591e-29
ATF6	K562	0.0964637	1	1
ATF7	K562	0.601123	1	1
ATF7	MCF-7	0.437515	1	1
BACH1	H1	0.972018	0.699543	1
BACH1	K562	1.19812	7.47002e-18	1.01042e-16
BCL6	K562	1.0368	0.417471	1
BHLHE40	K562	0.466367	1	1
CEBPB	H1	0.738571	0.999928	1
CEBPB	HeLa-S3	1.18237	4.9915e-08	4.75117e-07
CEBPB	K562	0.843665	1	1
CEBPB	MCF-7	0.726777	1	1
CEBPG	K562	0.796957	1	1
CEBPG	MCF-7	0.887853	0.991795	1
CLOCK	K562	1.07339	0.339722	1
CLOCK	MCF-7	0.281862	1	1
CREB1	H1	0.290925	1	1
CREB1	K562	0.56849	1	1
CREB1	MCF-7	0.385222	1	1
CREB3	K562	0.380787	1	1
CREB3L1	K562	0.227103	1	1
CREM	K562	0.347932	1	1
CTCF	H1	0.37104	1	1
CTCF	HeLa-S3	0.161492	1	1
CTCF	K562	0.149094	1	1
CTCF	MCF-7	0.229887	1	1
CTCFL	K562	0.0714272	1	1
CUX1	K562	1.32687	5.37278e-05	0.000394516
CUX1	MCF-7	0.717045	0.999669	1
E2F1	HeLa-S3	0.0959541	1	1
E2F1	K562	0.153378	1	1
E2F1	MCF-7	0.145425	1	1
E2F3	K562	0.222131	1	1
E2F4	HeLa-S3	0.0228686	1	1
E2F4	K562	0.0176914	1	1
E2F6	H1	0.327922	1	1
E2F6	HeLa-S3	0.0418449	1	1
E2F6	K562	0.100869	1	1
E2F7	K562	0.156054	1	1
E2F8	K562	0.239593	1	1
E2F8	MCF-7	0.0282084	1	1
EGR1	H1	0.193729	1	1
EGR1	K562	0.173968	1	1
EGR1	MCF-7	0.0769424	1	1
ELF1	K562	0.431346	1	1
ELF1	MCF-7	0.152625	1	1
ELF2	K562	0.0886118	1	1
ELF4	K562	0.283013	1	1
ELK1	HeLa-S3	0.0196007	1	1
ELK1	K562	0.0305579	1	1
ELK1	MCF-7	0.00896263	1	1
ELK3	K562	0.487904	0.9775	1
ELK4	HeLa-S3	0.036343	1	1
ERF	K562	0.126287	1	1
ESR1	MCF-7	0.435587	1	1
ESRRA	K562	0.777626	1	1
ESRRA	MCF-7	0.355259	1	1
ESRRB	K562	2.63469	0.00474069	0.0290085
ETS1	K562	0.0747718	1	1
ETS2	K562	0.120304	1	1
ETV1	K562	0.668503	1	1
ETV5	K562	0.1643	1	1
ETV6	K562	0.488207	1	1
FOS	HeLa-S3	0.866022	0.999999	1
FOS	K562	0.649845	1	1
FOS	MCF-7	1.08574	2.41713e-07	2.14208e-06
FOSL1	H1	0.0416372	1	1
FOSL1	K562	1.09973	1.91775e-18	2.73812e-17
FOSL2	MCF-7	0.768619	1	1
FOXA1	K562	0.969512	0.628982	1
FOXA1	MCF-7	0.919	0.998446	1
FOXA3	K562	1.16836	4.02806e-05	0.000304474
FOXK2	K562	0.95937	0.927229	1
FOXK2	MCF-7	0.113525	1	1
FOXO4	K562	0.975808	0.604114	1
GABPA	H1	0.0680482	1	1
GABPA	HeLa-S3	0.106795	1	1
GABPA	K562	0.529345	1	1
GABPA	MCF-7	0.0828853	1	1
GATA1	K562	4.6363	2.97485e-239	3.82268e-237
GATA2	K562	3.68113	0	0
GATA3	MCF-7	1.29497	2.8007e-07	2.39927e-06
HES1	K562	0.249946	1	1
HES1	MCF-7	0.0720452	1	1
HEY1	K562	0.662812	0.978732	1
HINFP	K562	0.0921628	1	1
HMBOX1	K562	1.44711	1.0675e-15	1.37174e-14
HSF1	MCF-7	0.147756	1	1
IKZF1	K562	1.18063	2.104e-30	4.50606e-29
IRF1	K562	1.25422	1.30706e-46	3.35915e-45
IRF2	K562	0.676765	1	1
IRF3	HeLa-S3	0.217568	1	1
IRF9	K562	1.22906	0.0008665	0.00571001
JUN	H1	0.348876	1	1
JUN	HeLa-S3	0.896947	0.99484	1
JUN	K562	0.664795	1	1
JUN	MCF-7	0.199284	1	1
JUNB	K562	0.910999	1	1
JUND	H1	1.13354	0.00359133	0.0225115
JUND	HeLa-S3	1.11635	1.0855e-12	1.26806e-11
JUND	K562	1.05078	3.65056e-05	0.000284301
JUND	MCF-7	0.577914	1	1
KLF10	K562	0.863646	0.845146	1
KLF13	K562	0.227628	1	1
KLF16	K562	0.320806	1	1
KLF4	MCF-7	0.175021	1	1
KLF6	K562	0.206974	1	1
KLF9	MCF-7	0.0721472	1	1
LEF1	K562	1.47349	2.14784e-32	5.01813e-31
MAFF	HeLa-S3	1.14354	0.000542927	0.0036719
MAFF	K562	1.48775	1.22536e-46	3.35915e-45
MAFG	K562	1.68742	3.34522e-148	2.86574e-146
MAFK	H1	1.52811	3.67435e-12	4.10569e-11
MAFK	HeLa-S3	0.771576	1	1
MAFK	K562	1.17023	4.10391e-19	6.20414e-18
MAFK	MCF-7	0.625869	1	1
MAX	H1	0.48571	1	1
MAX	HeLa-S3	0.182312	1	1
MAX	K562	0.475251	1	1
MAX	MCF-7	0.123506	1	1
MAZ	HeLa-S3	0.0385006	1	1
MAZ	K562	0.123162	1	1
MAZ	MCF-7	0.0432362	1	1
MEF2A	K562	1.99565	8.8756e-60	2.85128e-58
MEF2D	K562	2.00699	3.49665e-62	1.28377e-60
MEIS2	K562	1.12497	6.7027e-05	0.000478498
MGA	K562	0.781997	1	1
MITF	K562	0.923065	1	1
MLX	K562	0.182962	1	1
MNT	K562	0.432106	1	1
MNT	MCF-7	0.210486	1	1
MSX2	MCF-7	0.515367	0.997726	1
MXI1	H1	0.259878	1	1
MXI1	HeLa-S3	0.196202	1	1
MXI1	K562	0.651722	1	1
MYBL2	K562	0.608714	0.999998	1
MYC	H1	0.309367	1	1
MYC	HeLa-S3	0.0967867	1	1
MYC	K562	0.272875	1	1
MYC	MCF-7	0.115774	1	1
NEUROD1	K562	0.321853	1	1
NEUROD1	MCF-7	1.40754	0.0144181	0.0861734
NFATC3	K562	1.74574	7.60391e-25	1.39586e-23
NFE2	K562	1.12956	6.49512e-11	6.95519e-10
NFE2L1	K562	1.15104	7.4169e-06	5.95669e-05
NFE2L2	HeLa-S3	0.746793	1	1
NFIB	MCF-7	0.587612	1	1
NFIC	K562	0.865277	1	1
NFIX	K562	1.05713	0.344687	1
NFYA	HeLa-S3	0.113016	1	1
NFYA	K562	0.340083	1	1
NFYB	HeLa-S3	0.15074	1	1
NFYB	K562	0.42565	1	1
NR2C1	K562	0.749394	1	1
NR2C2	HeLa-S3	0.145095	1	1
NR2C2	K562	0.287613	1	1
NR2F1	K562	0.86288	1	1
NR2F2	K562	1.18494	1.33968e-07	1.22963e-06
NR2F2	MCF-7	0.688604	1	1
NR3C1	K562	0.743472	0.969748	1
NR4A1	K562	1.5171	3.16045e-22	5.4149e-21
NRF1	H1	0.0630531	1	1
NRF1	HeLa-S3	0.0069365	1	1
NRF1	K562	0.0811075	1	1
NRF1	MCF-7	0.0118091	1	1
OVOL1	MCF-7	0.193095	1	1
PBX2	K562	1.87881	2.234e-113	1.43535e-111
PKNOX1	K562	0.934804	0.999987	1
PKNOX1	MCF-7	0.421585	1	1
POU5F1	H1	6.83558	5.73693e-67	2.45732e-65
PRDM1	HeLa-S3	0.664345	1	1
RBPJ	K562	1.37853	0.00328324	0.0210948
RELA	K562	0.965926	0.699069	1
REST	H1	0.538885	1	1
REST	HeLa-S3	0.584319	1	1
REST	K562	0.236954	1	1
REST	MCF-7	0.325667	1	1
RFX1	K562	0.712299	1	1
RFX1	MCF-7	0.537725	1	1
RFX5	H1	0.275838	1	1
RFX5	HeLa-S3	0.396081	1	1
RFX5	K562	0.289262	1	1
RFX5	MCF-7	0.196796	1	1
RFX7	K562	0.600497	0.962718	1
RREB1	K562	0.497803	1	1
RUNX1	K562	1.49366	6.20854e-10	6.1369e-09
SMAD3	K562	0.834571	0.942452	1
SMAD5	K562	0.209868	1	1
SP1	H1	0.267943	1	1
SP1	K562	0.0924104	1	1
SP1	MCF-7	0.021268	1	1
SP2	H1	0.0735383	1	1
SP2	K562	0.0559955	1	1
SP4	H1	0.132471	1	1
SPDEF	MCF-7	0.161029	1	1
SPI1	K562	0.809759	1	1
SREBF1	K562	0.429576	1	1
SREBF1	MCF-7	0.497073	1	1
SREBF2	HeLa-S3	0.0767884	1	1
SREBF2	K562	0.861007	0.797961	1
SRF	H1	1.86774	9.48467e-11	9.75024e-10
SRF	K562	1.28984	4.71602e-14	5.77151e-13
SRF	MCF-7	0.637738	1	1
STAT3	HeLa-S3	0.961295	0.800285	1
TBX18	K562	0.945217	0.772128	1
TCF3	K562	0.551862	1	1
TCF7	K562	0.632637	1	1
TCF7L2	HeLa-S3	0.576907	1	1
TCF7L2	K562	0.48191	1	1
TCF7L2	MCF-7	0.733835	1	1
TCFL5	K562	0.173905	1	1
TEAD1	K562	0.989375	0.60059	1
TEAD2	K562	0.698774	1	1
TEAD4	H1	2.49975	1.67337e-81	8.6011e-80
TEAD4	K562	0.950168	0.952853	1
TEAD4	MCF-7	0.818402	0.999242	1
TFCP2	K562	0.617893	1	1
TFDP1	K562	0.0795293	1	1
TFE3	K562	0.745673	1	1
THAP1	K562	0.048304	1	1
USF1	H1	0.706737	1	1
USF1	K562	0.836849	1	1
USF2	H1	0.406689	1	1
USF2	HeLa-S3	0.491722	1	1
USF2	K562	0.815861	1	1
VEZF1	K562	0.211146	1	1
YY1	H1	0.353899	1	1
YY1	K562	0.245617	1	1
ZBED1	K562	0.0921751	1	1
ZBTB12	K562	0.550606	1	1
ZBTB33	K562	0.160482	1	1
ZBTB33	MCF-7	0.323454	1	1
ZBTB7A	K562	0.103038	1	1
ZBTB7B	MCF-7	0.0737269	1	1
ZKSCAN1	HeLa-S3	0.958086	0.667274	1
ZKSCAN1	K562	0.87535	0.995887	1
ZKSCAN1	MCF-7	0.85333	0.857026	1
ZNF143	H1	0.179453	1	1
ZNF143	HeLa-S3	0.049476	1	1
ZNF143	K562	0.186869	1	1
ZNF148	K562	0.161209	1	1
ZNF24	K562	0.888607	1	1
ZNF24	MCF-7	0.324194	1	1
ZNF263	K562	0.25154	1	1
ZNF274	K562	2.03773	4.49017e-07	3.7225e-06
ZNF282	K562	0.400383	1	1
ZNF384	K562	0.704646	1	1
ZNF740	K562	0.16943	1	1
ZSCAN29	K562	0.597737	1	1

## Sheet: K562
TF_name	Cell_line	Enrichment Score	p_value	qvalues
ATF2	H1	0.549493	1	1
ATF2	HepG2	0.872677	1	1
ATF3	H1	0.159327	1	1
ATF3	HepG2	0.258084	1	1
ATF4	HepG2	1.07204	0.279553	1
ATF6	HepG2	0.139901	1	1
ATF7	HepG2	0.65173	1	1
ATF7	MCF-7	0.419831	1	1
BACH1	H1	0.854589	0.996782	1
BCL6	HepG2	1.27034	1.56179e-17	1.1373e-16
BHLHE40	HepG2	0.30397	1	1
CEBPA	HepG2	2.37124	8.3954e-305	3.97382e-303
CEBPB	H1	0.838029	0.98703	1
CEBPB	HeLa-S3	2.16722	2.67578e-93	4.47012e-92
CEBPB	HepG2	1.46417	1.50765e-44	1.47646e-43
CEBPB	MCF-7	1.13593	0.00230767	0.0112996
CEBPD	HepG2	1.73014	1.21331e-60	1.43575e-59
CEBPG	HepG2	1.47291	2.08956e-37	1.9143e-36
CEBPG	MCF-7	1.35444	6.59176e-08	3.82053e-07
CLOCK	MCF-7	0.217396	1	1
CREB1	H1	0.195581	1	1
CREB1	HepG2	0.54388	1	1
CREB1	MCF-7	0.383705	1	1
CREB3	HepG2	0.0773097	1	1
CREM	HepG2	0.204386	1	1
CTCF	H1	0.345843	1	1
CTCF	HeLa-S3	0.160674	1	1
CTCF	HepG2	0.168375	1	1
CTCF	MCF-7	0.193958	1	1
CUX1	MCF-7	0.985235	0.58165	1
DBP	HepG2	0.384922	1	1
DLX6	HepG2	0.892322	0.870353	1
E2F1	HeLa-S3	0.0508545	1	1
E2F1	HepG2	0.0214807	1	1
E2F1	MCF-7	0.109564	1	1
E2F2	HepG2	0.0473696	1	1
E2F4	HeLa-S3	0.0172863	1	1
E2F4	HepG2	0.0436173	1	1
E2F4	MCF-7	0.00823643	1	1
E2F6	H1	0.227991	1	1
E2F6	HeLa-S3	0.0207822	1	1
E2F8	MCF-7	0.017764	1	1
EGR1	H1	0.122472	1	1
EGR1	HepG2	0.0723925	1	1
EGR1	MCF-7	0.0509846	1	1
ELF1	HepG2	0.276547	1	1
ELF1	MCF-7	0.138683	1	1
ELF3	HepG2	0.485219	1	1
ELF4	HepG2	0.0701327	1	1
ELK1	HeLa-S3	0.0139399	1	1
ELK1	HepG2	0.025715	1	1
ELK1	MCF-7	0.00691176	1	1
ELK4	HeLa-S3	0.0292872	1	1
ELK4	HepG2	0.0168635	1	1
ERF	HepG2	0.111102	1	1
ESR1	MCF-7	0.445804	1	1
ESRRA	HepG2	1.05212	0.0418732	0.182954
ESRRA	MCF-7	0.430705	1	1
ETS1	HepG2	0.07385	1	1
ETV4	HepG2	0.488577	1	1
ETV5	HepG2	0.110041	1	1
ETV6	HepG2	0.0528212	1	1
FOS	HeLa-S3	1.3133	1.7231e-15	1.19356e-14
FOS	MCF-7	1.41545	2.70401e-75	3.49063e-74
FOSL1	H1	0.226289	1	1
FOSL1	HepG2	0.703556	1	1
FOSL2	HepG2	1.1278	1.17621e-16	8.35112e-16
FOSL2	MCF-7	1.0579	0.0112495	0.0523748
FOXA1	HepG2	2.35838	0	0
FOXA1	MCF-7	2.2568	3.09099e-103	5.85227e-102
FOXA2	HepG2	2.30761	0	0
FOXA3	HepG2	1.93657	1.01495e-149	2.62043e-148
FOXK1	HepG2	1.18937	2.14071e-06	1.1471e-05
FOXK2	HepG2	0.904114	0.976976	1
FOXK2	MCF-7	0.089811	1	1
FOXP1	HepG2	2.64582	4.98373e-205	1.57264e-203
GABPA	H1	0.0351647	1	1
GABPA	HeLa-S3	0.0818864	1	1
GABPA	HepG2	0.32588	1	1
GABPA	MCF-7	0.0824816	1	1
GATA2	HepG2	1.79477	8.37792e-46	9.15127e-45
GATA3	MCF-7	1.3885	6.92559e-09	4.09764e-08
GATA4	HepG2	1.72469	3.95423e-15	2.67381e-14
GFI1	HepG2	1.15529	2.29141e-05	0.00011832
GMEB2	HepG2	0.0512893	1	1
HES1	MCF-7	0.0437365	1	1
HINFP	HepG2	0.0402855	1	1
HLF	HepG2	1.39415	5.3314e-77	7.57059e-76
HNF1A	HepG2	3.03039	0	0
HNF1B	HepG2	2.01965	2.60832e-64	3.22071e-63
HNF4A	HepG2	2.59252	0	0
HNF4G	HepG2	2.32548	2.49535e-242	8.8585e-241
HOXA5	HepG2	1.12433	0.22146	0.92492
HSF1	MCF-7	0.144689	1	1
HSF2	HepG2	0.733729	1	1
IKZF1	HepG2	2.07859	0.00816565	0.0386507
IRF1	HepG2	0.395235	1	1
IRF2	HepG2	0.428412	1	1
IRF3	HeLa-S3	0.259704	1	1
IRF5	HepG2	0.287474	1	1
ISL2	HepG2	0.915803	0.892985	1
ISX	HepG2	0.710859	0.933081	1
JUN	H1	0.363902	1	1
JUN	HeLa-S3	1.1247	0.00592973	0.0285431
JUN	HepG2	0.836066	1	1
JUN	MCF-7	0.293807	1	1
JUND	H1	1.86693	2.09424e-34	1.85864e-33
JUND	HeLa-S3	1.47143	8.27027e-104	1.67768e-102
JUND	HepG2	1.18278	1.12251e-28	9.37628e-28
JUND	MCF-7	0.912905	0.996671	1
KLF11	HepG2	0.0618524	1	1
KLF13	HepG2	0.0740342	1	1
KLF16	HepG2	0.0909997	1	1
KLF4	MCF-7	0.127583	1	1
KLF6	HepG2	0.0634669	1	1
KLF9	HepG2	0.0753188	1	1
KLF9	MCF-7	0.043214	1	1
LBX2	HepG2	0.0472404	1	1
MAFF	HeLa-S3	0.98965	0.605917	1
MAFF	HepG2	1.13228	1.65915e-06	9.06152e-06
MAFG	HepG2	0.508501	1	1
MAFK	H1	1.24461	0.000344322	0.0017462
MAFK	HeLa-S3	0.627732	1	1
MAFK	HepG2	0.81299	1	1
MAFK	MCF-7	0.905989	0.95996	1
MAX	H1	0.36036	1	1
MAX	HeLa-S3	0.155666	1	1
MAX	HepG2	0.373422	1	1
MAX	MCF-7	0.0980833	1	1
MAZ	HeLa-S3	0.0200118	1	1
MAZ	HepG2	0.0552425	1	1
MAZ	MCF-7	0.0264701	1	1
MEF2A	HepG2	1.431	9.47103e-11	5.72292e-10
MEF2D	HepG2	1.40405	3.09024e-13	2.041e-12
MEIS1	HepG2	0.470599	1	1
MEIS2	HepG2	0.443001	1	1
MIXL1	HepG2	1.01067	0.447154	1
MLX	HepG2	0.224126	1	1
MNT	HepG2	0.331271	1	1
MNT	MCF-7	0.170357	1	1
MNX1	HepG2	0.556886	1	1
MSX2	MCF-7	0.346414	0.999999	1
MTF1	HepG2	0.114758	1	1
MXI1	H1	0.298273	1	1
MXI1	HeLa-S3	0.219994	1	1
MXI1	HepG2	0.42438	1	1
MYBL2	HepG2	0.42503	1	1
MYC	H1	0.203818	1	1
MYC	HeLa-S3	0.072041	1	1
MYC	HepG2	0.154967	1	1
MYC	MCF-7	0.0889992	1	1
NEUROD1	MCF-7	2.12984	2.2751e-05	0.00011832
NFATC3	HepG2	0.247603	1	1
NFE2	HepG2	0.469038	1	1
NFE2L1	HepG2	0.120683	1	1
NFE2L2	HeLa-S3	0.514537	1	1
NFE2L2	HepG2	0.720574	1	1
NFIA	HepG2	1.42478	8.48261e-13	5.47514e-12
NFIB	HepG2	0.359244	1	1
NFIB	MCF-7	0.550233	1	1
NFIC	HepG2	2.07867	2.2479e-30	1.93455e-29
NFIL3	HepG2	1.52435	8.96134e-47	1.01801e-45
NFKB2	HepG2	0.130307	1	1
NFYA	HeLa-S3	0.0628189	1	1
NFYA	HepG2	0.102319	1	1
NFYB	HeLa-S3	0.0785381	1	1
NFYB	HepG2	0.0799601	1	1
NFYC	HepG2	0.146766	1	1
NKX3-1	HepG2	0.54052	0.999671	1
NR2C2	HeLa-S3	0.19549	1	1
NR2C2	HepG2	0.342682	1	1
NR2F1	HepG2	1.24526	4.23848e-23	3.43922e-22
NR2F2	HepG2	2.18839	1.08259e-82	1.70808e-81
NR2F2	MCF-7	1.08448	0.0593937	0.255573
NR5A1	HepG2	1.56848	4.66893e-80	6.97882e-79
NRF1	H1	0.0572351	1	1
NRF1	HeLa-S3	0.00667421	1	1
NRF1	HepG2	0.0266917	1	1
NRF1	MCF-7	0.00684963	1	1
NRL	HepG2	0.305005	1	1
ONECUT1	HepG2	1.54967	1.02612e-96	1.82136e-95
ONECUT2	HepG2	1.86138	4.03886e-41	3.82345e-40
OVOL1	MCF-7	0.183193	1	1
PBX2	HepG2	1.34046	0.0139928	0.0640959
PITX1	HepG2	1.05015	0.141177	0.598421
PKNOX1	MCF-7	0.412058	1	1
POU5F1	H1	12.5005	5.79666e-77	7.83929e-76
PPARG	HepG2	0.905639	0.998749	1
PRDM1	HeLa-S3	1.03059	0.358303	1
PRDM4	HepG2	0.123493	1	1
RARA	HepG2	1.98676	2.92381e-176	8.30363e-175
RBPJ	HepG2	0.332488	1	1
RELA	HepG2	0.371021	1	1
REST	H1	0.445796	1	1
REST	HeLa-S3	0.404913	1	1
REST	HepG2	0.269667	1	1
REST	MCF-7	0.227739	1	1
RFX1	HepG2	0.283434	1	1
RFX1	MCF-7	0.454644	1	1
RFX3	HepG2	0.224407	1	1
RFX5	H1	0.225246	1	1
RFX5	HeLa-S3	0.428731	1	1
RFX5	HepG2	0.10875	1	1
RFX5	MCF-7	0.131332	1	1
RORA	HepG2	1.68956	0.00131947	0.00657421
RREB1	HepG2	0.708412	1	1
RXRB	HepG2	1.45836	3.56362e-45	3.61453e-44
SIX1	HepG2	0.937903	0.879216	1
SMAD3	HepG2	0.578569	1	1
SNAI1	HepG2	0.266968	1	1
SOX13	HepG2	2.25422	2.17776e-115	4.75756e-114
SOX18	HepG2	0.308507	1	1
SP1	H1	0.165344	1	1
SP1	HepG2	0.0263065	1	1
SP1	MCF-7	0.0136608	1	1
SP2	H1	0.0354652	1	1
SP2	HepG2	0.0240869	1	1
SP4	H1	0.0334415	1	1
SPDEF	MCF-7	0.161761	1	1
SREBF1	MCF-7	0.519341	1	1
SREBF2	HeLa-S3	0.0782236	1	1
SRF	H1	1.9175	1.08107e-11	6.82275e-11
SRF	HepG2	0.826802	0.999994	1
SRF	MCF-7	0.636082	1	1
STAT3	HeLa-S3	1.29912	1.36399e-06	7.59553e-06
TBX2	HepG2	0.876685	0.999959	1
TBX3	HepG2	0.680341	1	1
TCF3	HepG2	0.0988653	1	1
TCF7	HepG2	4.28083	1.02788e-296	4.17025e-295
TCF7L2	HeLa-S3	0.955311	0.84708	1
TCF7L2	HepG2	3.11019	0	0
TCF7L2	MCF-7	1.67603	2.93992e-20	2.31927e-19
TEAD1	HepG2	1.43458	2.30379e-45	2.42325e-44
TEAD2	HepG2	0.224611	1	1
TEAD4	H1	3.27225	2.58642e-131	6.1212e-130
TEAD4	HepG2	1.19232	2.75275e-11	1.69952e-10
TEAD4	MCF-7	2.04726	4.79908e-19	3.68362e-18
TEF	HepG2	0.930346	0.911137	1
TFAP4	HepG2	0.908357	1	1
TFDP1	HepG2	0.0359346	1	1
TFE3	HepG2	0.237129	1	1
TGIF2	HepG2	0.459753	1	1
THAP11	HepG2	0.177483	1	1
THRB	HepG2	0.91413	0.991211	1
TP53	HepG2	0.674957	1	1
USF1	H1	0.620079	1	1
USF1	HepG2	0.508467	1	1
USF2	H1	0.378998	1	1
USF2	HeLa-S3	0.425181	1	1
USF2	HepG2	0.263404	1	1
XBP1	HepG2	0.133381	1	1
YY1	H1	0.306733	1	1
YY1	HepG2	0.0756645	1	1
ZBTB14	HepG2	0.0163437	1	1
ZBTB26	HepG2	0.656425	1	1
ZBTB33	HepG2	0.0510235	1	1
ZBTB33	MCF-7	0.121334	1	1
ZBTB7A	HepG2	0.0974828	1	1
ZBTB7B	HepG2	0.192785	1	1
ZBTB7B	MCF-7	0.0452212	1	1
ZEB1	HepG2	0.933803	0.968377	1
ZKSCAN1	HeLa-S3	0.776591	0.982442	1
ZKSCAN1	HepG2	0.828048	0.999406	1
ZKSCAN1	MCF-7	0.404483	1	1
ZKSCAN5	HepG2	0.481303	1	1
ZNF143	H1	0.141898	1	1
ZNF143	HeLa-S3	0.0272066	1	1
ZNF143	HepG2	0.170653	1	1
ZNF24	HepG2	0.742661	1	1
ZNF24	MCF-7	0.267798	1	1
ZNF263	HepG2	0.213076	1	1
ZNF274	HepG2	0.292576	1	1
ZNF317	HepG2	0.848392	0.999996	1
ZNF384	HepG2	0.686443	1	1
ZNF460	HepG2	0.813355	1	1
ZNF652	HepG2	1.07605	0.0290334	0.128836
ZNF740	HepG2	0.112522	1	1
ZSCAN29	HepG2	0.300045	1	1

## Sheet: MCF-7
TF_name	Cell_line	Enrichment Score	p_value	qvalues
ATF2	H1	0.586353	1	1
ATF2	HepG2	0.948144	0.996667	1
ATF2	K562	1.14721	1.17557e-14	9.15963e-14
ATF3	H1	0.192685	1	1
ATF3	HepG2	0.342093	1	1
ATF3	K562	0.875164	1	1
ATF4	HepG2	0.492246	1	1
ATF4	K562	1.26655	1.97092e-30	1.84281e-29
ATF6	HepG2	0.200817	1	1
ATF6	K562	0.0513812	1	1
ATF7	HepG2	0.729603	1	1
ATF7	K562	0.593792	1	1
BACH1	H1	0.817523	0.999808	1
BACH1	K562	1.04769	0.0158925	0.0667841
BCL6	HepG2	1.33556	1.87827e-28	1.71335e-27
BCL6	K562	2.02247	1.22368e-07	7.15086e-07
BHLHE40	HepG2	0.521931	1	1
BHLHE40	K562	0.596514	1	1
CEBPA	HepG2	1.28161	1.55009e-37	1.61037e-36
CEBPB	H1	0.753332	0.999863	1
CEBPB	HeLa-S3	1.17516	6.67648e-10	4.45894e-09
CEBPB	HepG2	1.05636	0.013878	0.0589815
CEBPB	K562	1.0857	9.71752e-05	0.000504771
CEBPD	HepG2	0.946066	0.971825	1
CEBPG	HepG2	1.02677	0.168991	0.638409
CEBPG	K562	0.908424	0.99968	1
CLOCK	K562	0.924901	0.717715	1
CREB1	H1	0.266629	1	1
CREB1	HepG2	0.579508	1	1
CREB1	K562	0.53843	1	1
CREB3	HepG2	0.19097	1	1
CREB3	K562	0.671172	1	1
CREB3L1	K562	0.348406	1	1
CREM	HepG2	0.267318	1	1
CREM	K562	0.391619	1	1
CTCF	H1	0.400313	1	1
CTCF	HeLa-S3	0.147177	1	1
CTCF	HepG2	0.20822	1	1
CTCF	K562	0.144054	1	1
CTCFL	K562	0.12795	1	1
CUX1	K562	1.38583	5.811e-06	3.24375e-05
DBP	HepG2	0.151249	1	1
DLX6	HepG2	0.769822	0.993636	1
E2F1	HeLa-S3	0.176967	1	1
E2F1	HepG2	0.0859123	1	1
E2F1	K562	0.193263	1	1
E2F2	HepG2	0.0924804	1	1
E2F3	K562	0.169065	1	1
E2F4	HeLa-S3	0.056922	1	1
E2F4	HepG2	0.146284	1	1
E2F4	K562	0.0647081	1	1
E2F6	H1	0.363842	1	1
E2F6	HeLa-S3	0.0812038	1	1
E2F6	K562	0.156662	1	1
E2F7	K562	0.107495	1	1
E2F8	K562	0.287086	1	1
EGR1	H1	0.291835	1	1
EGR1	HepG2	0.222738	1	1
EGR1	K562	0.272278	1	1
ELF1	HepG2	0.466912	1	1
ELF1	K562	0.552145	1	1
ELF2	K562	0.129016	1	1
ELF3	HepG2	0.645234	1	1
ELF4	HepG2	0.103186	1	1
ELF4	K562	0.339089	1	1
ELK1	HeLa-S3	0.0384708	1	1
ELK1	HepG2	0.0586775	1	1
ELK1	K562	0.052803	1	1
ELK3	K562	0.260128	0.99998	1
ELK4	HeLa-S3	0.0676633	1	1
ELK4	HepG2	0.0165663	1	1
ERF	HepG2	0.203783	1	1
ERF	K562	0.263007	1	1
ESRRA	HepG2	1.84999	8.48133e-100	1.66948e-98
ESRRA	K562	1.13239	7.84571e-08	4.65761e-07
ESRRB	K562	2.49724	0.00748466	0.0333246
ETS1	HepG2	0.102613	1	1
ETS1	K562	0.125869	1	1
ETS2	K562	0.302693	1	1
ETV1	K562	0.814445	1	1
ETV4	HepG2	0.663965	1	1
ETV5	HepG2	0.236847	1	1
ETV5	K562	0.25241	1	1
ETV6	HepG2	0.125586	1	1
ETV6	K562	0.612892	1	1
FOS	HeLa-S3	0.545292	1	1
FOS	K562	0.539876	1	1
FOSL1	H1	0.030943	1	1
FOSL1	HepG2	0.351939	1	1
FOSL1	K562	0.962713	0.999651	1
FOSL2	HepG2	0.71199	1	1
FOXA1	HepG2	1.16769	2.47156e-21	2.10083e-20
FOXA1	K562	0.913551	0.807772	1
FOXA2	HepG2	1.10185	1.73264e-09	1.11726e-08
FOXA3	HepG2	0.973684	0.898955	1
FOXA3	K562	1.14213	0.000380285	0.0018471
FOXK1	HepG2	0.764065	1	1
FOXK2	HepG2	0.708581	1	1
FOXK2	K562	1.00987	0.372774	1
FOXO4	K562	2.00395	0.0296541	0.12055
FOXP1	HepG2	1.10722	2.41877e-05	0.000129232
GABPA	H1	0.105573	1	1
GABPA	HeLa-S3	0.186219	1	1
GABPA	HepG2	0.534537	1	1
GABPA	K562	0.693029	1	1
GATA1	K562	5.87905	1.83605e-286	9.80977e-285
GATA2	HepG2	2.16095	4.72932e-88	8.84383e-87
GATA2	K562	4.91284	0	0
GATA4	HepG2	1.59477	1.00482e-14	7.99581e-14
GFI1	HepG2	1.20408	6.95036e-09	4.33239e-08
GMEB2	HepG2	0.0288092	1	1
HES1	K562	0.419522	1	1
HEY1	K562	1.13511	0.300827	1
HINFP	HepG2	0.146051	1	1
HINFP	K562	0.168149	1	1
HLF	HepG2	1.06847	2.27924e-05	0.000123541
HMBOX1	K562	1.84218	3.018e-36	2.97035e-35
HNF1A	HepG2	3.26548	0	0
HNF1B	HepG2	2.18506	1.13709e-104	2.36261e-103
HNF4A	HepG2	3.10116	0	0
HNF4G	HepG2	3.1226	0	0
HOXA5	HepG2	0.531255	0.999999	1
HSF2	HepG2	1.16137	0.000101885	0.000521984
IKZF1	K562	1.38966	2.83286e-109	6.62182e-108
IRF1	HepG2	0.581278	1	1
IRF1	K562	1.25618	1.37655e-44	1.66074e-43
IRF2	HepG2	0.532627	1	1
IRF2	K562	0.706601	1	1
IRF3	HeLa-S3	0.6238	0.979234	1
IRF5	HepG2	0.726861	0.999837	1
IRF9	K562	1.27238	0.000224546	0.00111973
ISL2	HepG2	1.06968	0.191271	0.701329
ISX	HepG2	0.645331	0.960258	1
JUN	H1	0.283977	1	1
JUN	HeLa-S3	0.740317	1	1
JUN	HepG2	0.687944	1	1
JUN	K562	0.690498	1	1
JUNB	K562	0.792659	1	1
JUND	H1	0.863944	0.999081	1
JUND	HeLa-S3	0.818717	1	1
JUND	HepG2	0.598035	1	1
JUND	K562	0.954362	0.999872	1
KLF10	K562	1.59621	0.00187936	0.00889721
KLF11	HepG2	0.15599	1	1
KLF13	HepG2	0.215655	1	1
KLF13	K562	0.274077	1	1
KLF16	HepG2	0.233364	1	1
KLF16	K562	0.46377	1	1
KLF6	HepG2	0.170498	1	1
KLF6	K562	0.361352	1	1
KLF9	HepG2	0.187994	1	1
LBX2	HepG2	0.322665	0.99977	1
LEF1	K562	2.54545	5.87555e-161	1.99769e-159
MAFF	HeLa-S3	1.00286	0.476435	1
MAFF	HepG2	1.01148	0.326311	1
MAFF	K562	1.46438	1.61107e-43	1.77218e-42
MAFG	HepG2	1.14901	0.00928957	0.0408741
MAFG	K562	1.66703	2.26611e-136	6.51943e-135
MAFK	H1	1.19536	0.00157137	0.00753451
MAFK	HeLa-S3	0.755846	1	1
MAFK	HepG2	0.826093	1	1
MAFK	K562	1.16387	6.66741e-17	5.42089e-16
MAX	H1	0.501016	1	1
MAX	HeLa-S3	0.302154	1	1
MAX	HepG2	0.775584	1	1
MAX	K562	0.664952	1	1
MAZ	HeLa-S3	0.0857796	1	1
MAZ	HepG2	0.206743	1	1
MAZ	K562	0.194276	1	1
MEF2A	HepG2	1.35836	1.19477e-08	7.32529e-08
MEF2A	K562	2.18575	6.33045e-66	9.1061e-65
MEF2D	HepG2	1.54299	2.28026e-22	1.9833e-21
MEF2D	K562	2.30855	5.46758e-87	9.7375e-86
MEIS1	HepG2	0.615387	1	1
MEIS2	HepG2	0.794328	0.999998	1
MEIS2	K562	1.21772	6.38916e-10	4.34463e-09
MGA	K562	0.882878	0.999394	1
MITF	K562	0.928563	1	1
MIXL1	HepG2	0.890492	0.981317	1
MLX	HepG2	0.377885	1	1
MLX	K562	0.0533589	1	1
MNT	HepG2	0.638723	1	1
MNT	K562	0.644172	1	1
MNX1	HepG2	0.897694	0.899577	1
MTF1	HepG2	0.249768	1	1
MXI1	H1	0.319625	1	1
MXI1	HeLa-S3	0.224194	1	1
MXI1	HepG2	0.575356	1	1
MXI1	K562	1.01485	0.42912	1
MYBL2	HepG2	0.527179	1	1
MYBL2	K562	0.719365	0.994196	1
MYC	H1	0.309927	1	1
MYC	HeLa-S3	0.133373	1	1
MYC	HepG2	0.445968	1	1
MYC	K562	0.38816	1	1
NEUROD1	K562	0.461602	1	1
NFATC3	HepG2	0.329248	1	1
NFATC3	K562	1.82144	4.48287e-25	3.99189e-24
NFE2	HepG2	0.568355	1	1
NFE2	K562	1.04866	0.00694873	0.0313111
NFE2L1	HepG2	0.409057	1	1
NFE2L1	K562	0.976584	0.772996	1
NFE2L2	HeLa-S3	0.82996	0.99992	1
NFE2L2	HepG2	0.803963	1	1
NFIA	HepG2	1.22424	6.35969e-06	3.49783e-05
NFIB	HepG2	0.766696	1	1
NFIC	HepG2	1.53121	1.69458e-13	1.1958e-12
NFIC	K562	0.869628	0.999998	1
NFIL3	HepG2	1.0336	0.106847	0.416258
NFIX	K562	1.3791	0.00476922	0.0217523
NFKB2	HepG2	0.365679	1	1
NFYA	HeLa-S3	0.174341	1	1
NFYA	HepG2	0.246866	1	1
NFYA	K562	0.37056	1	1
NFYB	HeLa-S3	0.221904	1	1
NFYB	HepG2	0.179278	1	1
NFYB	K562	0.388631	1	1
NFYC	HepG2	0.35708	1	1
NKX3-1	HepG2	0.161332	1	1
NR2C1	K562	1.04427	0.0544083	0.218803
NR2C2	HeLa-S3	0.461502	1	1
NR2C2	HepG2	0.738312	1	1
NR2C2	K562	0.485027	1	1
NR2F1	HepG2	1.798	2.5346e-167	9.47941e-166
NR2F1	K562	1.23756	2.05985e-37	2.08212e-36
NR2F2	HepG2	2.28713	1.5328e-113	3.82178e-112
NR2F2	K562	1.8688	4.17407e-73	6.50459e-72
NR3C1	HepG2	0.645331	0.942255	1
NR3C1	K562	0.510288	0.999997	1
NR4A1	K562	1.82767	3.52454e-41	3.76623e-40
NR5A1	HepG2	2.3164	6.96538e-298	4.34175e-296
NRF1	H1	0.0836463	1	1
NRF1	HeLa-S3	0.010513	1	1
NRF1	HepG2	0.0749867	1	1
NRF1	K562	0.125639	1	1
NRL	HepG2	0.634348	1	1
ONECUT1	HepG2	1.65938	2.45383e-147	7.64777e-146
ONECUT2	HepG2	2.75264	2.88965e-105	6.35724e-104
PBX2	HepG2	1.83412	1.27026e-07	7.30889e-07
PBX2	K562	1.73205	3.22225e-85	5.23966e-84
PITX1	HepG2	1.36638	2.7716e-14	2.11547e-13
PKNOX1	K562	0.986253	0.803138	1
POU5F1	H1	13.7389	7.4883e-86	1.27301e-84
PPARG	HepG2	1.65253	3.77043e-51	4.70047e-50
PRDM1	HeLa-S3	0.752408	1	1
PRDM4	HepG2	0.196286	1	1
RARA	HepG2	2.11339	4.54408e-251	2.12436e-249
RBPJ	HepG2	0.558238	1	1
RBPJ	K562	1.54459	0.000308106	0.00151621
RELA	HepG2	0.358919	1	1
RELA	K562	1.63402	3.37039e-11	2.33431e-10
REST	H1	0.520152	1	1
REST	HeLa-S3	0.396142	1	1
REST	HepG2	0.486288	1	1
REST	K562	0.31565	1	1
RFX1	HepG2	0.382651	1	1
RFX1	K562	0.630331	1	1
RFX3	HepG2	0.267258	1	1
RFX5	H1	0.391946	1	1
RFX5	HeLa-S3	0.320776	1	1
RFX5	HepG2	0.176836	1	1
RFX5	K562	0.374355	1	1
RFX7	K562	1.2332	0.302651	1
RORA	HepG2	3.60629	1.48662e-09	9.75429e-09
RREB1	HepG2	1.10436	4.88403e-06	2.76762e-05
RREB1	K562	0.793823	1	1
RUNX1	K562	1.31029	2.60197e-05	0.000137061
RXRB	HepG2	1.75735	2.2185e-114	5.92655e-113
SIX1	HepG2	0.759344	1	1
SMAD3	HepG2	1.01	0.475658	1
SMAD3	K562	0.688889	0.998708	1
SMAD5	K562	0.38359	1	1
SNAI1	HepG2	0.649401	1	1
SOX13	HepG2	1.71718	6.16093e-69	9.21675e-68
SOX18	HepG2	0.38133	1	1
SP1	H1	0.334824	1	1
SP1	HepG2	0.0965775	1	1
SP1	K562	0.104636	1	1
SP2	H1	0.0618301	1	1
SP2	HepG2	0.10698	1	1
SP2	K562	0.0461549	1	1
SP4	H1	0.165273	1	1
SPI1	K562	1.03094	0.0131018	0.0563228
SREBF1	K562	0.456437	1	1
SREBF2	HeLa-S3	0.214335	1	1
SREBF2	K562	1.26123	0.183754	0.680437
SRF	H1	1.70722	4.84838e-08	2.92467e-07
SRF	HepG2	1.05587	0.114461	0.441324
SRF	K562	1.65494	1.34861e-43	1.52843e-42
STAT3	HeLa-S3	0.730874	1	1
TBX18	K562	1.88373	1.1422e-13	8.37616e-13
TBX2	HepG2	1.28654	1.41332e-13	1.01651e-12
TBX3	HepG2	0.962763	0.746961	1
TCF3	HepG2	0.299317	1	1
TCF3	K562	0.767066	1	1
TCF7	HepG2	2.8718	3.59758e-239	1.495e-237
TCF7	K562	1.1013	0.0856562	0.337215
TCF7L2	HeLa-S3	1.03266	0.220269	0.792121
TCF7L2	HepG2	2.27928	0	0
TCF7L2	K562	1.09307	0.215212	0.78145
TCFL5	K562	0.164833	1	1
TEAD1	HepG2	0.959017	0.971225	1
TEAD1	K562	1.13081	0.00435176	0.0200933
TEAD2	HepG2	0.544494	1	1
TEAD2	K562	0.764684	1	1
TEAD4	H1	2.12717	2.08037e-62	2.8817e-61
TEAD4	HepG2	1.00378	0.444537	1
TEAD4	K562	1.06229	0.0276111	0.113479
TEF	HepG2	0.632385	1	1
TFAP4	HepG2	1.29229	2.68932e-51	3.46829e-50
TFCP2	K562	0.30726	1	1
TFDP1	HepG2	0.0978501	1	1
TFDP1	K562	0.121176	1	1
TFE3	HepG2	0.342108	1	1
TFE3	K562	0.79274	1	1
TGIF2	HepG2	0.592938	1	1
THAP1	K562	0.078591	1	1
THAP11	HepG2	0.314056	1	1
THRB	HepG2	1.6784	1.05521e-43	1.23328e-42
TP53	HepG2	0.492646	1	1
USF1	H1	0.737835	1	1
USF1	HepG2	0.74207	1	1
USF1	K562	0.91185	1	1
USF2	H1	0.425899	1	1
USF2	HeLa-S3	0.557281	1	1
USF2	HepG2	0.435322	1	1
USF2	K562	0.875429	1	1
VEZF1	K562	0.321499	1	1
XBP1	HepG2	0.196492	1	1
YY1	H1	0.363053	1	1
YY1	HepG2	0.149494	1	1
YY1	K562	0.278078	1	1
ZBED1	K562	0.127428	1	1
ZBTB12	K562	0.852773	0.953395	1
ZBTB14	HepG2	0.106607	1	1
ZBTB26	HepG2	0.833031	1	1
ZBTB33	HepG2	0.161543	1	1
ZBTB33	K562	0.187228	1	1
ZBTB7A	HepG2	0.333644	1	1
ZBTB7A	K562	0.225491	1	1
ZBTB7B	HepG2	0.632786	1	1
ZEB1	HepG2	0.924799	0.984951	1
ZKSCAN1	HeLa-S3	1.25982	0.0224189	0.0931629
ZKSCAN1	HepG2	1.16452	0.00349135	0.0163221
ZKSCAN1	K562	1.05884	0.134568	0.513557
ZKSCAN5	HepG2	1.01064	0.382699	1
ZNF143	H1	0.222588	1	1
ZNF143	HeLa-S3	0.074085	1	1
ZNF143	HepG2	0.28687	1	1
ZNF143	K562	0.236845	1	1
ZNF148	K562	0.28884	1	1
ZNF24	HepG2	0.812138	1	1
ZNF24	K562	1.14194	4.97234e-20	4.13257e-19
ZNF263	HepG2	0.513029	1	1
ZNF263	K562	0.338875	1	1
ZNF274	HepG2	0.54758	1	1
ZNF274	K562	1.16514	0.177157	0.662568
ZNF282	HepG2	0.322665	0.999558	1
ZNF282	K562	0.809436	0.999958	1
ZNF317	HepG2	1.05642	0.061253	0.243709
ZNF384	HepG2	0.755964	1	1
ZNF384	K562	0.839635	1	1
ZNF460	HepG2	1.23632	1.71565e-54	2.29162e-53
ZNF652	HepG2	1.14299	0.000107847	0.000545064
ZNF740	HepG2	0.371419	1	1
ZNF740	K562	0.323343	1	1
ZSCAN29	HepG2	0.572989	1	1
ZSCAN29	K562	0.595962	1	1
