# Supplementary material for: Detection of new pioneer transcription factors as cell-type-specific nucleosome binders
Source: eLife. 2024 Jan 31;12:RP88936. doi: 10.7554/eLife.88936 (PMC10945518; doi:10.7554/eLife.88936)
Supplement: Figure 2—figure supplement 4—source data 1. [file elife-88936-fig2-figsupp4-data1.xlsx]

## Sheet: Figure 2–figure supplement 4a
TF_name	Cell_line	Enrichment Score	p_value
GATA2	K562	6.38618	0
GATA1	K562	6.15333	2.72868e-131
GATA2	HepG2	4.50519	3.59046e-73
LEF1	K562	4.47877	7.67969e-168
FOXA1	K562	4.26512	1.04563e-16
STAT3	HeLa-S3	4.24938	3.05342e-28
HNF1A	HepG2	4.08707	1.31437e-166
HNF4A	HepG2	3.63554	0
TCF7	HepG2	3.51175	6.72226e-93
HNF4G	HepG2	3.3203	1.44279e-165
KLF10	K562	3.30773	1.26959e-05
MEF2D	K562	3.11299	2.65915e-74
CEBPA	HepG2	2.94989	9.5152e-167
RUNX1	K562	2.92849	4.07375e-24
CEBPD	HepG2	2.83933	1.69556e-65
MAFG	K562	2.79034	3.18892e-245
FOXA1	MCF-7	2.77577	2.69232e-61
FOXA1	HepG2	2.76305	1.42303e-197
NFE2L1	K562	2.74968	2.56521e-91
TCF7L2	HepG2	2.72599	4.87979e-134
NR2F2	HepG2	2.696	1.97599e-48
FOXA3	K562	2.61335	2.66456e-65
CEBPB	HeLa-S3	2.57561	5.12004e-43
IRF9	K562	2.57308	2.67633e-23
GATA4	HepG2	2.53672	6.70999e-15
MEF2A	K562	2.50577	4.58537e-47
SOX13	HepG2	2.43031	2.54872e-51
FOXP1	HepG2	2.38286	1.18115e-69
MAFF	K562	2.35388	1.56236e-99
ONECUT2	HepG2	2.32715	4.90316e-26
NFE2	K562	2.28186	6.89313e-181
JUND	HeLa-S3	2.27044	1.21366e-130
FOXA2	HepG2	2.25571	3.38834e-142
BACH1	K562	2.20435	2.95246e-134
DBP	HepG2	2.20024	0.0669604
THRB	HepG2	2.15065	1.49824e-28
GATA3	MCF-7	2.13793	5.19331e-15
JUNB	K562	2.06492	2.40132e-195
SRF	K562	2.04529	2.23484e-44
RXRB	HepG2	2.03032	3.57569e-55
FOXA3	HepG2	2.00836	5.10903e-65
JUND	K562	1.97486	0
MEF2A	HepG2	1.95046	1.77684e-12
RARA	HepG2	1.94657	3.2909e-71
CEBPG	HepG2	1.92421	2.9017e-38
FOS	K562	1.91386	1.19825e-42
MAFK	K562	1.90392	1.75284e-133
FOSL1	K562	1.88973	0
PBX2	K562	1.86893	1.85222e-62
NR4A1	K562	1.86738	8.20341e-26
NFIC	HepG2	1.85591	2.39489e-10
NR5A1	HepG2	1.80674	2.47088e-55
NFIL3	HepG2	1.79571	2.11556e-33
FOS	MCF-7	1.77658	1.11315e-83
FOSL2	MCF-7	1.76172	1.09186e-43
NFATC3	K562	1.7602	6.72446e-16
NR2F2	K562	1.75475	1.1239e-33
ONECUT1	HepG2	1.71557	4.51315e-58
PBX2	HepG2	1.70451	0.00366382
CEBPB	HepG2	1.67829	1.45894e-32
FOXO4	K562	1.65011	0.163438
RBPJ	K562	1.63136	0.00235998
NR2F1	HepG2	1.61368	5.26511e-40
TEF	HepG2	1.61173	1.04847e-06
PRDM1	HeLa-S3	1.59716	0.000475701
HNF1B	HepG2	1.55129	3.21872e-13
HMBOX1	K562	1.54506	7.96766e-14
BCL6	K562	1.4951	0.00539242
NFIX	K562	1.45999	0.0100795
FOSL2	HepG2	1.45543	4.87695e-62
JUND	HepG2	1.44442	2.41505e-57
ATF4	K562	1.43764	1.65032e-41
TCF7L2	MCF-7	1.42074	1.08686e-05
ESRRA	HepG2	1.41942	9.26073e-14
HLF	HepG2	1.40773	1.74314e-35
ZNF274	K562	1.40259	0.0467771
MAFF	HeLa-S3	1.3776	2.27073e-05
TEAD1	HepG2	1.35739	6.93259e-15
FOXK2	K562	1.35162	5.13481e-16
CEBPG	MCF-7	1.34895	0.000250908
IKZF1	K562	1.34772	1.50295e-54
TCF7L2	K562	1.3343	0.0227599
IRF1	K562	1.30689	1.73927e-40
TCF7	K562	1.30479	0.00140351
ZNF652	HepG2	1.29729	5.29079e-06
CEBPG	K562	1.29452	9.21342e-13
CUX1	K562	1.2914	0.00254297
MAFG	HepG2	1.27987	0.00354202
CEBPB	K562	1.26157	5.82147e-17
MAFF	HepG2	1.25435	9.2654e-09
FOS	HeLa-S3	1.2483	2.37372e-05
JUN	HeLa-S3	1.21508	0.00792297
FOXK2	HepG2	1.20302	0.0162375
BCL6	HepG2	1.16701	0.000134495
NFIA	HepG2	1.15227	0.023783
GFI1	HepG2	1.13775	0.00913131
PPARG	HepG2	1.13388	0.00658811
ZNF24	K562	1.13074	1.04028e-11
CEBPB	MCF-7	1.11979	0.0473956
MEIS2	K562	1.114	0.00381862
IRF2	K562	1.10666	0.0135275
PITX1	HepG2	1.09061	0.105864
FOXK1	HepG2	1.08932	0.0658317
NR2F1	K562	1.08422	7.23365e-05
CUX1	MCF-7	1.07825	0.364487
TEAD4	MCF-7	1.07043	0.282018
SRF	MCF-7	1.0616	0.308249
TEAD4	K562	1.06038	0.0616198
MEF2D	HepG2	1.05195	0.230642
NFE2L2	HeLa-S3	1.04829	0.352128
MAFK	MCF-7	1.04616	0.304881
JUND	MCF-7	1.03047	0.279425
TBX18	K562	1.02345	0.430762
TEAD4	HepG2	1.0146	0.364399
ISL2	HepG2	1.00328	0.519094
ESRRA	K562	0.993292	0.599025
RELA	K562	0.990853	0.563435
SMAD3	K562	0.979475	0.589935
MITF	K562	0.968896	0.972379
ATF2	K562	0.967722	0.936953
NFE2L2	HepG2	0.961179	0.744028
NFIB	HepG2	0.954846	0.759036
NFE2	HepG2	0.938408	0.77409
ZNF24	HepG2	0.929029	0.958919
SPI1	K562	0.922141	0.999999
USF1	K562	0.915743	0.999885
SIX1	HepG2	0.911644	0.870204
ZKSCAN1	HeLa-S3	0.911381	0.726857
MAFK	HepG2	0.902167	0.999809
ZEB1	HepG2	0.890945	0.984438
TEAD1	K562	0.887967	0.987764
TCF7L2	HeLa-S3	0.874599	0.972612
ZBTB12	K562	0.864759	0.91257
ZNF384	K562	0.86387	1
ATF4	HepG2	0.841569	0.903558
FOSL1	HepG2	0.83541	0.999999
NFIC	K562	0.832572	1
ESRRB	K562	0.832554	0.765279
USF2	K562	0.827856	1
ZNF460	HepG2	0.820221	1
ATF3	K562	0.816057	1
PKNOX1	K562	0.813241	1
NR2C1	K562	0.811234	1
TFAP4	HepG2	0.808748	1
SRF	HepG2	0.808189	0.999675
IRF1	HepG2	0.802051	0.99664
NR2F2	MCF-7	0.800774	0.99955
ZBTB26	HepG2	0.797218	0.999998
MAFK	HeLa-S3	0.796421	0.999965
MIXL1	HepG2	0.793227	0.997613
ZKSCAN1	K562	0.780393	0.999986
RREB1	HepG2	0.763437	1
TBX2	HepG2	0.758881	1
HOXA5	HepG2	0.754699	0.95582
ZNF384	HepG2	0.753338	1
ATF2	HepG2	0.752386	1
DLX6	HepG2	0.744273	0.978974
NFE2L1	HepG2	0.740651	0.987523
SREBF2	K562	0.73641	0.947293
MGA	K562	0.718789	1
ZNF317	HepG2	0.706783	1
NR3C1	K562	0.69235	0.990066
TBX3	HepG2	0.682052	0.999997
ETV1	K562	0.681002	1
JUN	K562	0.680968	1
TFE3	K562	0.675723	1
HEY1	K562	0.675043	0.967641
ZKSCAN1	HepG2	0.671905	1
MXI1	K562	0.664519	1
RREB1	K562	0.659025	1
ESR1	MCF-7	0.648953	1
MEIS2	HepG2	0.630499	1
CLOCK	K562	0.630039	0.996179
HSF2	HepG2	0.62891	1
JUN	HepG2	0.611	1
NFIB	MCF-7	0.602991	1
TEAD2	K562	0.594044	1
ZKSCAN5	HepG2	0.593166	1
GABPA	K562	0.587926	1
USF1	HepG2	0.583704	1
MEIS1	HepG2	0.583252	0.999984
TFCP2	K562	0.563563	1
SMAD3	HepG2	0.552995	1
ZNF282	K562	0.547598	1
RFX7	K562	0.540035	0.963891
ATF7	HepG2	0.539368	1
ETV6	K562	0.538191	1
RFX1	K562	0.51848	1
ELF3	HepG2	0.510412	1
CREB1	HepG2	0.508717	1
IRF2	HepG2	0.503769	1
MNT	K562	0.496034	1
TP53	HepG2	0.493716	1
ETV4	HepG2	0.491255	1
TCF3	K562	0.488945	1
USF2	HeLa-S3	0.482289	1
CREB3	K562	0.482161	1
BHLHE40	K562	0.472968	1
MXI1	HepG2	0.464917	1
ESRRA	MCF-7	0.463564	1
MAX	K562	0.450208	1
ELF1	K562	0.449648	1
ATF7	K562	0.447279	1
SREBF1	K562	0.4381	1
E2F3	K562	0.435025	1
ZSCAN29	K562	0.434629	1
MAX	HepG2	0.430149	1
IRF5	HepG2	0.410587	1
ZSCAN29	HepG2	0.401252	1
MNT	HepG2	0.400281	1
TGIF2	HepG2	0.399688	1
NR2C2	HepG2	0.394169	1
SREBF1	MCF-7	0.392964	1
NRL	HepG2	0.392866	1
RELA	HepG2	0.388459	1
CREB1	K562	0.382499	1
PKNOX1	MCF-7	0.382235	1
MYBL2	K562	0.379706	1
ZKSCAN1	MCF-7	0.37878	1
NFATC3	HepG2	0.374504	1
RBPJ	HepG2	0.370368	1
USF2	HepG2	0.367669	1
NR2C2	K562	0.365942	1
REST	HeLa-S3	0.365692	1
RFX1	MCF-7	0.362724	1
NEUROD1	K562	0.362511	1
NKX3-1	HepG2	0.359913	0.999991
SNAI1	HepG2	0.358831	1
MTF1	HepG2	0.354545	1
CREB1	MCF-7	0.350597	1
ZNF24	MCF-7	0.349137	1
MNX1	HepG2	0.345189	1
ZBTB7B	HepG2	0.340925	1
SMAD5	K562	0.339298	1
ZNF274	HepG2	0.333219	1
REST	HepG2	0.333116	1
ATF7	MCF-7	0.333058	1
GABPA	HepG2	0.331241	1
HSF1	MCF-7	0.323824	1
MLX	K562	0.317663	1
CREB3L1	K562	0.316827	1
RFX5	HeLa-S3	0.311346	1
ZNF263	HepG2	0.307682	1
KLF6	K562	0.307365	1
MYC	K562	0.307076	1
BHLHE40	HepG2	0.302459	1
MXI1	HeLa-S3	0.295089	1
ISX	HepG2	0.294915	0.999998
HES1	K562	0.293022	1
CLOCK	MCF-7	0.291956	1
ELF1	HepG2	0.291149	1
ELF4	K562	0.280484	1
ATF3	HepG2	0.279789	1
NFYB	K562	0.278597	1
ZNF263	K562	0.275129	1
ZNF143	K562	0.270583	1
MAX	HeLa-S3	0.264013	1
MYBL2	HepG2	0.263333	1
CREM	K562	0.262544	1
E2F8	K562	0.261642	1
TEAD2	HepG2	0.259937	1
REST	K562	0.257237	1
KLF16	K562	0.254859	1
CTCF	MCF-7	0.249515	1
SOX18	HepG2	0.23726	1
ZBED1	K562	0.237126	1
NFYA	K562	0.236718	1
VEZF1	K562	0.233248	1
ZNF740	K562	0.229186	1
MYC	HepG2	0.227869	1
REST	MCF-7	0.227585	1
JUN	MCF-7	0.225712	1
CTCF	HepG2	0.222213	1
MYC	HeLa-S3	0.221245	1
CTCF	HeLa-S3	0.218428	1
TFE3	HepG2	0.214003	1
NR2C2	HeLa-S3	0.213666	1
E2F1	HeLa-S3	0.20912	1
THAP11	HepG2	0.203048	1
RFX1	HepG2	0.203033	1
ZBTB7B	MCF-7	0.199728	1
ZNF148	K562	0.198834	1
CTCF	K562	0.198622	1
EGR1	K562	0.194961	1
MLX	HepG2	0.192121	1
ATF6	HepG2	0.191598	1
ZNF740	HepG2	0.190587	1
XBP1	HepG2	0.18805	1
NFKB2	HepG2	0.187559	1
E2F7	K562	0.184281	1
MNT	MCF-7	0.183901	1
KLF13	K562	0.179567	1
RFX3	HepG2	0.179312	1
ZNF143	HepG2	0.176966	1
YY1	K562	0.174707	1
ERF	K562	0.173685	1
TCF3	HepG2	0.172809	1
ETV5	K562	0.165495	1
ATF6	K562	0.165005	1
MSX2	MCF-7	0.163846	1
ZBTB7A	HepG2	0.160624	1
NFYC	HepG2	0.159509	1
ZBTB7A	K562	0.150214	1
CREM	HepG2	0.145633	1
MAZ	K562	0.142085	1
SPDEF	MCF-7	0.139073	1
ELF1	MCF-7	0.13704	1
GABPA	HeLa-S3	0.131662	1
KLF16	HepG2	0.131441	1
ZBTB33	K562	0.129863	1
EGR1	HepG2	0.129131	1
HES1	MCF-7	0.129119	1
KLF4	MCF-7	0.128982	1
ETV5	HepG2	0.128181	1
OVOL1	MCF-7	0.12807	1
RFX5	MCF-7	0.127773	1
HINFP	K562	0.12749	1
PRDM4	HepG2	0.127277	1
E2F6	K562	0.126448	1
ETS2	K562	0.124622	1
RFX5	K562	0.12288	1
KLF9	HepG2	0.121017	1
NFYB	HeLa-S3	0.120829	1
NFYA	HeLa-S3	0.120639	1
KLF13	HepG2	0.120066	1
TFDP1	K562	0.116201	1
NFYA	HepG2	0.114722	1
ERF	HepG2	0.114107	1
E2F1	K562	0.113908	1
ELK3	K562	0.112507	1
MYC	MCF-7	0.110273	1
NR3C1	HepG2	0.108653	1
CREB3	HepG2	0.108429	1
E2F8	MCF-7	0.108236	1
SREBF2	HeLa-S3	0.107938	1
MAX	MCF-7	0.106548	1
RFX5	HepG2	0.10311	1
MAZ	HepG2	0.102006	1
KLF6	HepG2	0.0967948	1
ZBTB33	MCF-7	0.0947261	1
ELF2	K562	0.0945087	1
NFYB	HepG2	0.0940999	1
NRF1	K562	0.0933621	1
E2F1	MCF-7	0.0921608	1
KLF11	HepG2	0.0907193	1
GABPA	MCF-7	0.0886604	1
HINFP	HepG2	0.0872882	1
CTCFL	K562	0.0868556	1
ETS1	K562	0.0824898	1
MAZ	HeLa-S3	0.0776515	1
THAP1	K562	0.0767756	1
LBX2	HepG2	0.0754534	1
ZBTB33	HepG2	0.0722808	1
ZNF143	HeLa-S3	0.072269	1
ETS1	HepG2	0.0710567	1
EGR1	MCF-7	0.068279	1
ETV6	HepG2	0.0652885	1
TCFL5	K562	0.064289	1
YY1	HepG2	0.0641242	1
ELF4	HepG2	0.0612345	1
KLF9	MCF-7	0.0609455	1
E2F4	HepG2	0.0605104	1
E2F2	HepG2	0.0599147	1
ZBTB14	HepG2	0.0567942	1
TFDP1	HepG2	0.0564436	1
IRF3	HepG2	0.0543264	1
GMEB2	HepG2	0.0543262	1
SP1	K562	0.0522618	1
ELK1	K562	0.0464145	1
MAZ	MCF-7	0.0462084	1
E2F6	HeLa-S3	0.0459191	1
NRF1	HepG2	0.0445809	1
ELK4	HeLa-S3	0.0431791	1
SP2	K562	0.0428745	1
SP2	HepG2	0.0423955	1
FOXK2	MCF-7	0.041372	1
E2F1	HepG2	0.0406124	1
SP1	HepG2	0.0371694	1
E2F4	HeLa-S3	0.0354619	1
ELK1	HepG2	0.0330365	1
ELK1	HeLa-S3	0.031342	1
ELK4	HepG2	0.0253007	1
E2F4	K562	0.0204064	1
E2F4	MCF-7	0.013038	1
SP1	MCF-7	0.0120898	1
NRF1	MCF-7	0.0107543	1
NRF1	HeLa-S3	0.00981534	1
ELK1	MCF-7	0.00914196	1

## Sheet: Figure 2–figure supplement 4b
TF_name	Cell_line	Enrichment Score	p_value
MAFG	HepG2	27.077	5.88136e-11
LEF1	K562	13.6346	1.04102e-60
GATA1	K562	12.724	1.47794e-28
GATA2	K562	6.51214	5.04175e-69
THRB	HepG2	5.02613	2.83781e-19
ONECUT1	HepG2	4.81238	3.14603e-44
TCF7	HepG2	4.54217	1.2219e-22
GATA2	HepG2	4.33921	1.1352e-13
CEBPB	HeLa-S3	3.4833	3.01038e-11
TCF7	K562	3.215	7.60516e-06
MEF2A	HepG2	3.12349	1.84624e-07
CEBPB	MCF-7	2.90177	4.33759e-08
TEAD4	MCF-7	2.88914	8.62097e-06
GATA4	HepG2	2.83925	3.14045e-05
HNF4A	HepG2	2.81038	5.66391e-39
HMBOX1	K562	2.7204	9.54146e-10
FOXA1	MCF-7	2.50466	1.35654e-11
TCF7L2	HepG2	2.37551	1.85869e-22
MAFF	HeLa-S3	2.26768	0.000213776
NFATC3	K562	2.25786	2.68395e-08
ZBTB12	K562	2.1086	0.00701177
MAFF	HepG2	2.06375	1.13642e-08
TBX2	HepG2	2.00018	3.95543e-08
ZNF24	K562	1.97661	3.00782e-44
RARA	HepG2	1.97504	1.04771e-14
BCL6	HepG2	1.95842	4.44578e-09
CEBPG	MCF-7	1.95482	0.00111462
FOXA2	HepG2	1.948	1.0338e-15
FOXK2	HepG2	1.93718	0.000753705
FOXP1	HepG2	1.93228	9.5706e-09
FOXA1	HepG2	1.93013	1.61639e-15
MAFG	K562	1.91147	5.5936e-18
RBPJ	K562	1.79518	0.0439908
NR2F1	HepG2	1.76888	1.6881e-11
FOXA3	K562	1.7613	9.34252e-06
HNF4G	HepG2	1.73254	1.90308e-11
GATA3	MCF-7	1.73155	0.00634918
HNF1A	HepG2	1.71963	3.30611e-09
NR4A1	K562	1.70274	1.51094e-06
RXRB	HepG2	1.67753	1.31887e-08
MEF2A	K562	1.65095	0.000373424
FOXA3	HepG2	1.62564	8.89825e-07
FOS	MCF-7	1.61011	9.22998e-12
JUND	K562	1.60925	1.64842e-26
FOSL1	K562	1.56233	1.08141e-29
NFE2	K562	1.55468	7.70415e-11
RUNX1	K562	1.53078	0.0310297
ONECUT2	HepG2	1.52895	0.00618119
PRDM1	HeLa-S3	1.5286	0.105519
JUND	HepG2	1.52139	1.72758e-10
NR2F2	MCF-7	1.4763	0.00926637
ZKSCAN1	HepG2	1.47378	0.0544414
NR2F2	K562	1.47172	7.1174e-05
SIX1	HepG2	1.44988	0.0524229
SOX13	HepG2	1.40725	0.00293929
ISL2	HepG2	1.38469	0.132777
NFIC	HepG2	1.37916	0.0414201
FOSL2	HepG2	1.37787	2.3861e-07
CUX1	K562	1.35169	0.0773308
PPARG	HepG2	1.35167	0.00353245
IRF1	K562	1.33966	1.61131e-10
MEIS2	HepG2	1.33771	0.0682623
ESRRA	MCF-7	1.33284	0.0444184
IRF2	K562	1.31876	0.00793742
TCF7L2	MCF-7	1.31753	0.044575
JUND	HeLa-S3	1.29953	5.6592e-05
NR2F2	HepG2	1.29944	0.0187849
CEBPD	HepG2	1.29689	0.0145378
SRF	K562	1.28526	0.00569254
ZNF652	HepG2	1.27966	0.0366717
PBX2	K562	1.27953	0.00371152
TBX18	K562	1.27939	0.129917
HOXA5	HepG2	1.27905	0.356368
NEUROD1	K562	1.27083	0.0368886
MEF2D	HepG2	1.26679	0.0487361
ESRRA	K562	1.23841	0.000560108
JUNB	K562	1.23541	3.06015e-05
BACH1	K562	1.22603	0.000513514
MEF2D	K562	1.22271	0.043875
ATF4	K562	1.21763	0.000770386
GFI1	HepG2	1.21457	0.050325
FOXK1	HepG2	1.1575	0.131377
FOS	HeLa-S3	1.15571	0.105284
FOS	K562	1.1516	0.0744123
FOSL2	MCF-7	1.14704	0.032888
MAFK	K562	1.1444	0.00989237
NFE2L2	HeLa-S3	1.1425	0.321348
CUX1	MCF-7	1.13947	0.426837
TCF7L2	K562	1.12063	0.409827
NR2F1	K562	1.11298	0.0121006
ZKSCAN1	K562	1.108	0.260201
TEAD1	HepG2	1.10544	0.139498
JUND	MCF-7	1.09954	0.144416
CEBPA	HepG2	1.09784	0.125795
ESR1	MCF-7	1.08948	0.184531
IKZF1	K562	1.08681	0.017427
NFIL3	HepG2	1.06752	0.292863
FOXK2	K562	1.06126	0.24042
ZBTB26	HepG2	1.05874	0.317996
ESRRA	HepG2	1.05579	0.291483
NR5A1	HepG2	1.05123	0.269734
MEIS2	K562	1.01808	0.444204
HNF1B	HepG2	1.00676	0.509375
SPI1	K562	1.00557	0.45091
NFE2L1	HepG2	0.987746	0.586775
ZEB1	HepG2	0.982147	0.593206
HLF	HepG2	0.978387	0.642649
TFAP4	HepG2	0.973284	0.686564
RREB1	HepG2	0.972067	0.68971
ZSCAN29	HepG2	0.96792	0.620186
NFIA	HepG2	0.962439	0.638081
CEBPG	K562	0.960419	0.709677
NFIB	HepG2	0.950403	0.663853
TEAD4	HepG2	0.943817	0.768466
PKNOX1	K562	0.930528	0.941073
MAFF	K562	0.924038	0.83682
CEBPG	HepG2	0.913007	0.8298
NR2C1	K562	0.909714	0.928842
IRF1	HepG2	0.893341	0.80496
RFX7	K562	0.876277	0.741629
RFX5	K562	0.876271	0.791948
CEBPB	HepG2	0.869707	0.936676
IRF9	K562	0.842036	0.872155
FOSL1	HepG2	0.83899	0.976296
RELA	HepG2	0.835174	0.855998
USF2	HeLa-S3	0.828534	0.956
CEBPB	K562	0.818305	0.999664
TEAD4	K562	0.812998	0.996705
ZNF460	HepG2	0.809313	1
ZNF24	HepG2	0.807991	0.991156
MAFK	MCF-7	0.80074	0.93965
MGA	K562	0.796868	0.995788
SREBF1	MCF-7	0.792334	0.927431
NFE2L1	K562	0.776833	0.997406
NFIC	K562	0.746127	0.999904
TCF7L2	HeLa-S3	0.744943	0.990538
ZNF384	K562	0.742541	1
ZNF24	MCF-7	0.736262	0.997559
SREBF1	K562	0.726095	0.96161
MAFK	HepG2	0.722133	0.999996
NR2C2	HeLa-S3	0.714021	0.916467
PITX1	HepG2	0.697828	0.999061
NFE2	HepG2	0.694455	0.977133
MAFK	HeLa-S3	0.692742	0.99941
REST	HepG2	0.680236	0.999923
MITF	K562	0.678992	1
NFIX	K562	0.677118	0.918322
CREB3	K562	0.652962	0.999315
RELA	K562	0.639676	0.999773
PKNOX1	MCF-7	0.624741	1
MYBL2	K562	0.618081	0.964855
RBPJ	HepG2	0.614753	1
MXI1	K562	0.613569	0.999543
ZNF384	HepG2	0.598831	1
IRF5	HepG2	0.596174	0.993922
ZNF263	K562	0.593078	1
NFE2L2	HepG2	0.59044	0.99994
ZNF282	K562	0.589746	0.999999
JUN	MCF-7	0.578255	0.995377
OVOL1	MCF-7	0.573449	0.99686
HES1	K562	0.571897	0.999999
ETV6	K562	0.57028	1
E2F1	HeLa-S3	0.570126	0.994841
RFX1	K562	0.566878	1
TEAD1	K562	0.564766	1
ZBTB7B	MCF-7	0.561919	0.99916
NFIB	MCF-7	0.557886	1
HSF2	HepG2	0.548729	1
SMAD3	K562	0.547664	0.992295
RFX5	MCF-7	0.546499	0.997702
ATF2	K562	0.545322	1
MLX	K562	0.543602	0.998284
ZNF143	K562	0.542751	1
ETV1	K562	0.54233	1
ZNF317	HepG2	0.541478	1
CREB1	MCF-7	0.537482	1
ETV4	HepG2	0.535888	1
USF2	K562	0.533214	1
SNAI1	HepG2	0.527299	1
ZNF274	HepG2	0.513064	1
MNX1	HepG2	0.508196	0.999477
ELF3	HepG2	0.507647	1
GABPA	K562	0.507266	1
CTCF	MCF-7	0.502172	1
USF1	K562	0.498419	1
ATF6	K562	0.495622	0.999963
TFE3	K562	0.492233	1
ZBED1	K562	0.490512	0.999065
NR3C1	K562	0.487418	0.998381
TEAD2	K562	0.486906	1
SPDEF	MCF-7	0.486743	0.999998
JUN	HeLa-S3	0.486029	1
DLX6	HepG2	0.484983	0.998787
ATF3	K562	0.484339	1
CLOCK	MCF-7	0.462039	0.999999
TBX3	HepG2	0.460372	1
CTCF	HeLa-S3	0.452648	1
CREB3	HepG2	0.441931	0.999941
MYBL2	HepG2	0.436682	1
MEIS1	HepG2	0.428785	0.999985
ELF1	K562	0.42816	1
ZKSCAN5	HepG2	0.422747	1
ZNF143	HeLa-S3	0.422551	0.99999
MNT	K562	0.421075	1
SRF	HepG2	0.415651	1
REST	K562	0.409752	1
NRL	HepG2	0.403426	1
BHLHE40	K562	0.400578	1
RREB1	K562	0.398225	1
ATF7	MCF-7	0.39701	1
MNT	MCF-7	0.395089	1
ATF2	HepG2	0.384403	1
TCF3	HepG2	0.383625	1
TP53	HepG2	0.380371	1
ZBTB7B	HepG2	0.378844	1
IRF2	HepG2	0.376992	1
USF1	HepG2	0.373618	1
SMAD3	HepG2	0.372592	1
NR2C2	HepG2	0.372148	1
CREB3L1	K562	0.368725	1
MIXL1	HepG2	0.359827	1
MAX	HeLa-S3	0.351881	1
RFX1	MCF-7	0.349711	1
MAX	K562	0.348139	1
TCF3	K562	0.345554	1
ATF4	HepG2	0.345189	0.999999
JUN	K562	0.342686	1
SMAD5	K562	0.342419	1
MAX	HepG2	0.340758	1
NR2C2	K562	0.339268	1
ELF4	K562	0.336652	1
ZSCAN29	K562	0.336341	1
CREB1	HepG2	0.336316	1
E2F8	K562	0.330921	1
TEAD2	HepG2	0.330738	0.999988
TGIF2	HepG2	0.329821	1
ELK3	K562	0.3286	0.998551
E2F7	K562	0.322567	1
ZNF263	HepG2	0.320923	1
MYC	HeLa-S3	0.319643	1
E2F4	HeLa-S3	0.316691	0.999894
MXI1	HeLa-S3	0.305422	1
ZBTB33	K562	0.303979	1
CTCF	HepG2	0.299427	1
KLF16	K562	0.296373	1
HINFP	K562	0.289927	1
REST	MCF-7	0.289349	1
MXI1	HepG2	0.287845	1
MNT	HepG2	0.285181	1
JUN	HepG2	0.284305	1
GABPA	HeLa-S3	0.281627	1
MYC	K562	0.277216	1
MAX	MCF-7	0.276867	1
KLF4	MCF-7	0.276634	1
TFCP2	K562	0.276251	1
POU5F1	K562	0.273835	0.993005
ATF7	K562	0.270234	1
HES1	MCF-7	0.264965	0.999999
PRDM4	HepG2	0.260969	1
CTCF	K562	0.260595	1
KLF6	K562	0.258715	1
GABPA	HepG2	0.258651	1
ELF1	MCF-7	0.257146	1
MTF1	HepG2	0.253148	1
CREB1	K562	0.251158	1
KLF9	HepG2	0.251028	1
ELF1	HepG2	0.250319	1
ATF6	HepG2	0.250044	1
VEZF1	K562	0.249139	1
ZBTB7A	K562	0.248795	1
E2F1	K562	0.243145	1
GABPA	MCF-7	0.239323	1
USF2	HepG2	0.23459	1
THAP11	HepG2	0.234196	1
CREM	K562	0.234186	1
E2F1	MCF-7	0.232499	1
EGR1	K562	0.227547	1
ZNF143	HepG2	0.22542	1
MYC	HepG2	0.221447	1
ERF	K562	0.22048	1
BHLHE40	HepG2	0.2129	1
MYC	MCF-7	0.211371	1
ATF7	HepG2	0.210932	1
HINFP	HepG2	0.209114	1
ZNF740	K562	0.205909	1
ZNF740	HepG2	0.205328	1
KLF13	K562	0.204898	1
TFDP1	K562	0.204161	1
MAZ	MCF-7	0.203074	1
ELF2	K562	0.200307	1
MLX	HepG2	0.199385	1
NFKB2	HepG2	0.197819	1
ZNF148	K562	0.197333	1
YY1	K562	0.192905	1
MAZ	K562	0.188618	1
ETV5	K562	0.186128	1
TFE3	HepG2	0.183632	1
NFYA	K562	0.18037	1
MAZ	HeLa-S3	0.178399	1
E2F6	K562	0.177226	1
SOX18	HepG2	0.169503	1
E2F2	HepG2	0.165319	1
TCFL5	K562	0.16429	1
KLF16	HepG2	0.163782	1
KLF11	HepG2	0.159963	1
EGR1	MCF-7	0.159238	1
KLF13	HepG2	0.158937	1
SREBF2	HeLa-S3	0.155898	0.999998
ATF3	HepG2	0.155161	1
RFX1	HepG2	0.154257	1
CTCFL	K562	0.154142	1
EGR1	HepG2	0.153432	1
NFYB	K562	0.153396	1
E2F4	HepG2	0.153318	1
XBP1	HepG2	0.150881	1
ESRRB	K562	0.147869	0.999998
E2F4	K562	0.147827	1
MSX2	MCF-7	0.147007	1
ETS1	K562	0.146283	1
REST	HeLa-S3	0.145232	1
MAZ	HepG2	0.142144	1
ERF	HepG2	0.141217	1
NRF1	K562	0.140827	1
E2F8	MCF-7	0.140436	1
CREM	HepG2	0.140122	1
E2F1	HepG2	0.139344	1
RFX3	HepG2	0.137765	1
ISX	HepG2	0.135186	1
ELK4	HeLa-S3	0.132889	1
KLF6	HepG2	0.132621	1
KLF9	MCF-7	0.130977	1
ZBTB7A	HepG2	0.128064	1
ELK1	HeLa-S3	0.121727	1
ELK1	K562	0.119605	1
SP1	K562	0.118508	1
ETV5	HepG2	0.116409	1
TFDP1	HepG2	0.112709	1
ETS2	K562	0.110968	1
NFYA	HeLa-S3	0.107781	1
THAP1	K562	0.105406	1
ZBTB14	HepG2	0.0993803	1
NFYC	HepG2	0.0982738	1
ETV6	HepG2	0.0965556	1
E2F6	HeLa-S3	0.0963181	1
NFYB	HeLa-S3	0.09621	1
ZBTB33	HepG2	0.0953257	1
ELF4	HepG2	0.0900042	1
NRF1	HeLa-S3	0.0897201	1
NRF1	HepG2	0.0890676	1
NFYA	HepG2	0.0887091	1
YY1	HepG2	0.081342	1
SP2	K562	0.074262	1
ELK1	HepG2	0.0735743	1
SP1	MCF-7	0.0714687	1
ELK4	HepG2	0.0677578	1
NFYB	HepG2	0.0664788	1
SP2	HepG2	0.0625417	1
ETS1	HepG2	0.0594855	1
RFX5	HepG2	0.0578606	1
NRF1	MCF-7	0.0535343	1
SP1	HepG2	0.0531028	1
ELK1	MCF-7	0.0466842	1
FOXK2	MCF-7	0.046658	1
E2F4	MCF-7	0.0376114	1
LBX2	HepG2	0.0262865	1
