# Supplementary material for: Detection of new pioneer transcription factors as cell-type-specific nucleosome binders
Source: eLife. 2024 Jan 31;12:RP88936. doi: 10.7554/eLife.88936 (PMC10945518; doi:10.7554/eLife.88936)
Supplement: Figure 2—figure supplement 5—source data 1. [file elife-88936-fig2-figsupp5-data1.xlsx]

## Sheet: 0_0.8
TF_name	Cell_line	Enrichment Score	p_value
GATA2	K562	6.38687	0
GATA1	K562	6.11444	7.55433e-130
GATA2	HepG2	4.48319	1.51634e-72
LEF1	K562	4.48208	7.76768e-168
FOXA1	K562	4.30924	5.68152e-17
STAT3	HeLa-S3	4.22428	5.86357e-28
HNF1A	HepG2	4.08632	1.60951e-166
HNF4A	HepG2	3.62874	0
TCF7	HepG2	3.50591	1.41108e-92
HNF4G	HepG2	3.318	2.68284e-165
MEF2D	K562	3.13257	3.40051e-75
RUNX1	K562	2.95879	1.29366e-24
CEBPA	HepG2	2.95369	3.4291e-167
KLF10	K562	2.88726	0.00016288
CEBPD	HepG2	2.83787	2.08223e-65
MAFG	K562	2.80858	1.22242e-248
FOXA1	MCF-7	2.7797	1.71462e-61
NFE2L1	K562	2.77813	2.07498e-93
FOXA1	HepG2	2.76352	1.30961e-197
TCF7L2	HepG2	2.72807	2.99445e-134
NR2F2	HepG2	2.69017	3.54007e-48
FOXA3	K562	2.63864	9.58366e-67
IRF9	K562	2.5997	7.81273e-24
CEBPB	HeLa-S3	2.57408	5.91788e-43
GATA4	HepG2	2.535	7.12139e-15
MEF2A	K562	2.50973	3.50338e-47
SOX13	HepG2	2.43047	2.56224e-51
FOXP1	HepG2	2.37922	2.3238e-69
MAFF	K562	2.37179	1.979e-101
ONECUT2	HepG2	2.32818	4.6357e-26
NFE2	K562	2.29044	1.60031e-182
JUND	HeLa-S3	2.27106	9.78222e-131
FOXA2	HepG2	2.25604	3.19126e-142
BACH1	K562	2.21454	7.49202e-136
DBP	HepG2	2.21241	0.0651004
THRB	HepG2	2.15169	1.39015e-28
GATA3	MCF-7	2.13656	5.51431e-15
JUNB	K562	2.07923	2.70348e-199
SRF	K562	2.05667	4.53896e-45
RXRB	HepG2	2.02844	5.28851e-55
FOXA3	HepG2	2.00609	9.00171e-65
JUND	K562	1.98278	3.225412884237e-312
RARA	HepG2	1.93776	3.88591e-70
MEF2A	HepG2	1.93423	3.58636e-12
CEBPG	HepG2	1.92301	3.53857e-38
FOS	K562	1.91735	7.68093e-43
MAFK	K562	1.90727	4.39617e-134
FOSL1	K562	1.90145	0
PBX2	K562	1.88827	1.25242e-64
NFIC	HepG2	1.86618	1.60858e-10
NR4A1	K562	1.8587	2.25789e-25
NR5A1	HepG2	1.80259	7.33178e-55
NFIL3	HepG2	1.79682	1.81653e-33
FOS	MCF-7	1.77694	9.69866e-84
FOSL2	MCF-7	1.76284	8.64447e-44
NFATC3	K562	1.75763	8.5526e-16
NR2F2	K562	1.75269	1.77933e-33
ONECUT1	HepG2	1.71657	3.42282e-58
CEBPB	HepG2	1.67875	1.36819e-32
FOXO4	K562	1.66718	0.156801
PBX2	HepG2	1.65932	0.00577044
TEF	HepG2	1.62065	7.78003e-07
NR2F1	HepG2	1.60991	1.36132e-39
PRDM1	HeLa-S3	1.58763	0.000562396
HNF1B	HepG2	1.55719	1.97005e-13
HMBOX1	K562	1.5291	3.46602e-13
RBPJ	K562	1.47773	0.0144968
NFIX	K562	1.47509	0.00836997
FOSL2	HepG2	1.45776	1.43457e-62
JUND	HepG2	1.44789	4.22565e-58
ATF4	K562	1.44035	6.99984e-42
BCL6	K562	1.43479	0.0120153
TCF7L2	MCF-7	1.42324	9.81302e-06
ZNF274	K562	1.4171	0.0414691
ESRRA	HepG2	1.40985	2.87261e-13
HLF	HepG2	1.40754	1.89685e-35
MAFF	HeLa-S3	1.37442	2.59983e-05
FOXK2	K562	1.36209	8.96597e-17
TEAD1	HepG2	1.35947	5.06879e-15
CEBPG	MCF-7	1.35107	0.000233315
IKZF1	K562	1.34931	6.75014e-55
TCF7L2	K562	1.34811	0.018905
TCF7	K562	1.31828	0.000936675
IRF1	K562	1.31757	6.3587e-43
CUX1	K562	1.30476	0.00174968
CEBPG	K562	1.2909	1.71049e-12
ZNF652	HepG2	1.2791	1.64418e-05
MAFG	HepG2	1.2742	0.00413523
CEBPB	K562	1.25598	2.46099e-16
MAFF	HepG2	1.25181	1.26077e-08
FOS	HeLa-S3	1.24894	2.27632e-05
JUN	HeLa-S3	1.21155	0.00879068
FOXK2	HepG2	1.20182	0.0167547
BCL6	HepG2	1.16988	0.000106511
NFIA	HepG2	1.15625	0.0211017
GFI1	HepG2	1.14011	0.00821398
PPARG	HepG2	1.12985	0.00806643
CEBPB	MCF-7	1.1188	0.0487605
MEIS2	K562	1.11556	0.00345856
IRF2	K562	1.11415	0.00912075
ZNF24	K562	1.1064	2.09757e-08
PITX1	HepG2	1.09159	0.103431
NR2F1	K562	1.0851	6.26695e-05
FOXK1	HepG2	1.08255	0.0817686
CUX1	MCF-7	1.08232	0.355815
TEAD4	MCF-7	1.07117	0.279758
SRF	MCF-7	1.06338	0.302582
TEAD4	K562	1.05667	0.0741626
MEF2D	HepG2	1.05487	0.217785
MAFK	MCF-7	1.04968	0.290201
NFE2L2	HeLa-S3	1.04806	0.352928
JUND	MCF-7	1.03007	0.282139
TEAD4	HepG2	1.01413	0.368949
TBX18	K562	1.01387	0.468567
ISL2	HepG2	1.00387	0.517107
ESRRA	K562	0.994332	0.584874
SMAD3	K562	0.989608	0.564008
MITF	K562	0.975507	0.934114
ATF2	K562	0.973538	0.894899
NFIB	HepG2	0.960129	0.734052
NFE2L2	HepG2	0.957994	0.760163
NFE2	HepG2	0.939331	0.770857
RELA	K562	0.938616	0.785329
SPI1	K562	0.923553	0.999998
USF1	K562	0.921196	0.999705
ZNF24	HepG2	0.919574	0.975709
SIX1	HepG2	0.912945	0.866699
ZKSCAN1	HeLa-S3	0.909215	0.730828
MAFK	HepG2	0.898038	0.999895
ZEB1	HepG2	0.891297	0.984146
TEAD1	K562	0.884947	0.989542
ZBTB12	K562	0.873705	0.897349
TCF7L2	HeLa-S3	0.867759	0.978713
ZNF384	K562	0.86485	1
ATF4	HepG2	0.846224	0.89693
ESRRB	K562	0.841166	0.756505
FOSL1	HepG2	0.837602	0.999998
USF2	K562	0.83347	1
NFIC	K562	0.831652	1
ATF3	K562	0.822204	1
ZNF460	HepG2	0.818161	1
PKNOX1	K562	0.816115	1
NR2C1	K562	0.809719	1
SRF	HepG2	0.80689	0.999703
IRF1	HepG2	0.806488	0.995927
TFAP4	HepG2	0.803953	1
ZBTB26	HepG2	0.799567	0.999998
NR2F2	MCF-7	0.798486	0.999611
MAFK	HeLa-S3	0.795472	0.999968
MIXL1	HepG2	0.788567	0.998068
ZKSCAN1	K562	0.772227	0.999993
RREB1	HepG2	0.761421	1
TBX2	HepG2	0.753714	1
ZNF384	HepG2	0.753393	1
ATF2	HepG2	0.750384	1
HOXA5	HepG2	0.748539	0.95977
NFE2L1	HepG2	0.744748	0.986243
SREBF2	K562	0.744028	0.941795
DLX6	HepG2	0.733095	0.983284
MGA	K562	0.721895	1
ZNF317	HepG2	0.705728	1
NR3C1	K562	0.699512	0.988344
JUN	K562	0.685879	1
HEY1	K562	0.682026	0.964366
ETV1	K562	0.681201	1
TBX3	HepG2	0.67983	0.999997
TFE3	K562	0.679298	1
ZKSCAN1	HepG2	0.670186	1
RREB1	K562	0.662957	1
MXI1	K562	0.661832	1
ESR1	MCF-7	0.642691	1
CLOCK	K562	0.636556	0.995507
MEIS2	HepG2	0.632331	1
HSF2	HepG2	0.628041	1
JUN	HepG2	0.608355	1
NFIB	MCF-7	0.600408	1
ZKSCAN5	HepG2	0.591303	1
TEAD2	K562	0.589856	1
MEIS1	HepG2	0.586478	0.999981
GABPA	K562	0.584738	1
USF1	HepG2	0.583006	1
TFCP2	K562	0.569393	0.999999
ZNF282	K562	0.553263	1
RFX7	K562	0.545621	0.96185
SMAD3	HepG2	0.54214	1
ATF7	HepG2	0.539041	1
ETV6	K562	0.52877	1
RFX1	K562	0.521822	1
ELF3	HepG2	0.509964	1
CREB1	HepG2	0.508346	1
IRF2	HepG2	0.505041	1
MNT	K562	0.49592	1
ETV4	HepG2	0.490778	1
TP53	HepG2	0.488458	1
TCF3	K562	0.487545	1
USF2	HeLa-S3	0.481234	1
CREB3	K562	0.475085	1
BHLHE40	K562	0.468156	1
MXI1	HepG2	0.467489	1
ESRRA	MCF-7	0.461651	1
ELF1	K562	0.450873	1
ATF7	K562	0.449703	1
MAX	K562	0.448589	1
SREBF1	K562	0.442632	1
E2F3	K562	0.439525	1
ZSCAN29	K562	0.439126	1
MAX	HepG2	0.427347	1
IRF5	HepG2	0.412859	1
TGIF2	HepG2	0.400596	1
ZSCAN29	HepG2	0.39892	1
MNT	HepG2	0.398382	1
NR2C2	HepG2	0.392696	1
SREBF1	MCF-7	0.390891	1
NRL	HepG2	0.390698	1
CREB1	K562	0.384509	1
MYBL2	K562	0.383634	1
PKNOX1	MCF-7	0.381453	1
ZKSCAN1	MCF-7	0.380661	1
RELA	HepG2	0.378255	1
RBPJ	HepG2	0.370548	1
USF2	HepG2	0.366395	1
NEUROD1	K562	0.366262	1
NFATC3	HepG2	0.366115	1
NR2C2	K562	0.365508	1
REST	HeLa-S3	0.365138	1
RFX1	MCF-7	0.360489	1
MTF1	HepG2	0.356507	1
SNAI1	HepG2	0.353505	1
CREB1	MCF-7	0.350555	1
ZNF24	MCF-7	0.349959	1
MNX1	HepG2	0.347098	1
NKX3-1	HepG2	0.345971	0.999995
ZBTB7B	HepG2	0.339401	1
ATF7	MCF-7	0.333371	1
ZNF274	HepG2	0.331133	1
GABPA	HepG2	0.331118	1
REST	HepG2	0.33109	1
HSF1	MCF-7	0.325432	1
SMAD5	K562	0.321157	1
CREB3L1	K562	0.320104	1
KLF6	K562	0.309022	1
RFX5	HeLa-S3	0.307406	1
ZNF263	HepG2	0.306775	1
MYC	K562	0.305274	1
BHLHE40	HepG2	0.300862	1
ISX	HepG2	0.296547	0.999998
HES1	K562	0.296054	1
CLOCK	MCF-7	0.293406	1
MXI1	HeLa-S3	0.292963	1
ELF1	HepG2	0.290976	1
ELF4	K562	0.281802	1
MLX	K562	0.28083	1
NFYB	K562	0.28037	1
ATF3	HepG2	0.279012	1
ZNF263	K562	0.276823	1
ZNF143	K562	0.273383	1
MYBL2	HepG2	0.26479	1
CREM	K562	0.262197	1
E2F8	K562	0.259613	1
MAX	HeLa-S3	0.259558	1
REST	K562	0.256152	1
KLF16	K562	0.253482	1
TEAD2	HepG2	0.253078	1
CTCF	MCF-7	0.24929	1
ZBED1	K562	0.239579	1
NFYA	K562	0.239167	1
SOX18	HepG2	0.238573	1
VEZF1	K562	0.232135	1
ZNF740	K562	0.229406	1
REST	MCF-7	0.228715	1
MYC	HepG2	0.225528	1
JUN	MCF-7	0.22339	1
CTCF	HepG2	0.221992	1
CTCF	HeLa-S3	0.218215	1
MYC	HeLa-S3	0.217971	1
TFE3	HepG2	0.214123	1
NR2C2	HeLa-S3	0.213991	1
E2F1	HeLa-S3	0.209341	1
RFX1	HepG2	0.202836	1
THAP11	HepG2	0.202588	1
ZBTB7B	MCF-7	0.199633	1
CTCF	K562	0.199131	1
ZNF148	K562	0.196943	1
EGR1	K562	0.194665	1
ATF6	HepG2	0.192658	1
MLX	HepG2	0.190981	1
ZNF740	HepG2	0.189842	1
XBP1	HepG2	0.18909	1
NFKB2	HepG2	0.188596	1
E2F7	K562	0.186187	1
MNT	MCF-7	0.182535	1
RFX3	HepG2	0.179711	1
KLF13	K562	0.179211	1
YY1	K562	0.176515	1
ZNF143	HepG2	0.176127	1
ERF	K562	0.169499	1
TCF3	HepG2	0.168644	1
ETV5	K562	0.165642	1
MSX2	MCF-7	0.162349	1
ZBTB7A	HepG2	0.16058	1
NFYC	HepG2	0.158339	1
ATF6	K562	0.151556	1
ZBTB7A	K562	0.150585	1
CREM	HepG2	0.145656	1
MAZ	K562	0.141583	1
SPDEF	MCF-7	0.138168	1
ELF1	MCF-7	0.136551	1
KLF16	HepG2	0.131466	1
ZBTB33	K562	0.131207	1
GABPA	HeLa-S3	0.130925	1
HES1	MCF-7	0.12976	1
EGR1	HepG2	0.128504	1
KLF4	MCF-7	0.128315	1
PRDM4	HepG2	0.127981	1
OVOL1	MCF-7	0.127875	1
ETV5	HepG2	0.12698	1
RFX5	MCF-7	0.126158	1
ETS2	K562	0.125911	1
HINFP	K562	0.125778	1
E2F6	K562	0.125409	1
RFX5	K562	0.124151	1
KLF13	HepG2	0.12073	1
KLF9	HepG2	0.120605	1
NFYB	HeLa-S3	0.12055	1
NFYA	HeLa-S3	0.119747	1
TFDP1	K562	0.116365	1
NFYA	HepG2	0.114621	1
ERF	HepG2	0.113873	1
ELK3	K562	0.113671	1
E2F1	K562	0.113102	1
MYC	MCF-7	0.109951	1
NR3C1	HepG2	0.109254	1
CREB3	HepG2	0.109029	1
E2F8	MCF-7	0.108773	1
MAX	MCF-7	0.106288	1
RFX5	HepG2	0.10368	1
MAZ	HepG2	0.101709	1
SREBF2	HeLa-S3	0.100375	1
KLF6	HepG2	0.0966309	1
ELF2	K562	0.0942315	1
NFYB	HepG2	0.0935359	1
NRF1	K562	0.092671	1
E2F1	MCF-7	0.0919944	1
KLF11	HepG2	0.0899109	1
ZBTB33	MCF-7	0.0882671	1
GABPA	MCF-7	0.0880751	1
HINFP	HepG2	0.0877711	1
CTCFL	K562	0.0877542	1
ETS1	K562	0.0806303	1
LBX2	HepG2	0.0758708	1
MAZ	HeLa-S3	0.074961	1
THAP1	K562	0.0732603	1
ZNF143	HeLa-S3	0.0724003	1
ZBTB33	HepG2	0.0723414	1
ETS1	HepG2	0.0707909	1
EGR1	MCF-7	0.0677663	1
ETV6	HepG2	0.0650004	1
TCFL5	K562	0.0649541	1
YY1	HepG2	0.0640281	1
ELF4	HepG2	0.0615733	1
KLF9	MCF-7	0.0605947	1
E2F2	HepG2	0.0602461	1
E2F4	HepG2	0.0589159	1
ZBTB14	HepG2	0.0565013	1
TFDP1	HepG2	0.0557883	1
IRF3	HepG2	0.0546269	1
GMEB2	HepG2	0.0546268	1
SP1	K562	0.0517951	1
ELK1	K562	0.0468947	1
MAZ	MCF-7	0.0458793	1
E2F6	HeLa-S3	0.0448542	1
NRF1	HepG2	0.0446728	1
SP2	K562	0.043318	1
ELK4	HeLa-S3	0.0425126	1
SP2	HepG2	0.0424208	1
FOXK2	MCF-7	0.0415774	1
E2F1	HepG2	0.0408371	1
SP1	HepG2	0.0371778	1
E2F4	HeLa-S3	0.0357001	1
ELK1	HepG2	0.0321954	1
ELK1	HeLa-S3	0.0313883	1
ELK4	HepG2	0.0254407	1
E2F4	K562	0.0206175	1
E2F4	MCF-7	0.0131028	1
SP1	MCF-7	0.0121498	1
NRF1	MCF-7	0.010741	1
NRF1	HeLa-S3	0.00988127	1
ELK1	MCF-7	0.00910815	1

## Sheet: 0.1_0.8
TF_name	Cell_line	Enrichment Score	p_value
GATA2	K562	6.4011	0
GATA1	K562	6.16754	1.20447e-131
LEF1	K562	4.49584	8.1366e-169
GATA2	HepG2	4.4809	1.73166e-72
FOXA1	K562	4.29499	6.91967e-17
STAT3	HeLa-S3	4.22019	6.51289e-28
HNF1A	HepG2	4.08316	2.67575e-166
HNF4A	HepG2	3.63133	0
TCF7	HepG2	3.50391	1.76131e-92
HNF4G	HepG2	3.31763	2.82808e-165
MEF2D	K562	3.13479	2.41914e-75
CEBPA	HepG2	2.95293	4.12381e-167
RUNX1	K562	2.949	1.87478e-24
KLF10	K562	2.87771	0.000171633
CEBPD	HepG2	2.838	2.02442e-65
MAFG	K562	2.80247	1.72754e-247
FOXA1	MCF-7	2.77881	1.89735e-61
NFE2L1	K562	2.76894	9.85894e-93
FOXA1	HepG2	2.7634	1.31305e-197
TCF7L2	HepG2	2.72484	6.88175e-134
NR2F2	HepG2	2.69069	3.33344e-48
FOXA3	K562	2.63165	2.38142e-66
IRF9	K562	2.5911	1.16366e-23
CEBPB	HeLa-S3	2.57415	5.87069e-43
GATA4	HepG2	2.53318	7.50639e-15
MEF2A	K562	2.50142	8.14602e-47
SOX13	HepG2	2.43296	1.86169e-51
FOXP1	HepG2	2.3805	1.82646e-69
MAFF	K562	2.37037	2.57126e-101
ONECUT2	HepG2	2.32857	4.49432e-26
NFE2	K562	2.29356	2.6088e-183
JUND	HeLa-S3	2.27013	1.36972e-130
FOXA2	HepG2	2.25485	5.01488e-142
BACH1	K562	2.21351	9.80191e-136
DBP	HepG2	2.20717	0.0658959
THRB	HepG2	2.15119	1.44275e-28
GATA3	MCF-7	2.13769	5.24849e-15
JUNB	K562	2.07587	2.15463e-198
SRF	K562	2.05961	2.74364e-45
RXRB	HepG2	2.029	4.68769e-55
FOXA3	HepG2	2.00672	7.65489e-65
JUND	K562	1.98486	1.83930563383977e-313
MEF2A	HepG2	1.93803	3.0407e-12
RARA	HepG2	1.93787	3.71759e-70
CEBPG	HepG2	1.92453	2.79682e-38
MAFK	K562	1.91265	1.84363e-135
FOS	K562	1.911	2.16337e-42
FOSL1	K562	1.90085	0
PBX2	K562	1.88202	6.32593e-64
NR4A1	K562	1.87116	5.82113e-26
NFIC	HepG2	1.86175	1.90999e-10
NR5A1	HepG2	1.80601	3.02324e-55
NFIL3	HepG2	1.79955	1.18643e-33
FOS	MCF-7	1.77738	8.06583e-84
NFATC3	K562	1.76217	6.03572e-16
FOSL2	MCF-7	1.76165	1.11153e-43
NR2F2	K562	1.75193	1.94127e-33
ONECUT1	HepG2	1.71571	4.40685e-58
CEBPB	HepG2	1.68012	1.06234e-32
FOXO4	K562	1.66166	0.15892
PBX2	HepG2	1.65538	0.00599606
TEF	HepG2	1.61681	8.84978e-07
NR2F1	HepG2	1.61086	1.06959e-39
PRDM1	HeLa-S3	1.59437	0.000499713
HNF1B	HepG2	1.55618	2.13977e-13
HMBOX1	K562	1.53769	1.59338e-13
RBPJ	K562	1.47284	0.0152626
NFIX	K562	1.47021	0.00889069
FOSL2	HepG2	1.45675	2.43842e-62
JUND	HepG2	1.44665	7.85907e-58
ATF4	K562	1.44367	1.90596e-42
BCL6	K562	1.43004	0.012738
TCF7L2	MCF-7	1.42332	9.77692e-06
ESRRA	HepG2	1.41441	1.67963e-13
ZNF274	K562	1.41242	0.0431233
HLF	HepG2	1.40842	1.38942e-35
MAFF	HeLa-S3	1.37512	2.52306e-05
FOXK2	K562	1.3605	1.15782e-16
TEAD1	HepG2	1.35841	5.9463e-15
CEBPG	MCF-7	1.35036	0.000239011
IKZF1	K562	1.34831	1.19324e-54
TCF7L2	K562	1.34365	0.0200815
IRF1	K562	1.31605	1.38335e-42
TCF7	K562	1.31392	0.00106863
CUX1	K562	1.30044	0.0019765
CEBPG	K562	1.28663	3.3011e-12
ZNF652	HepG2	1.28424	1.19892e-05
MAFG	HepG2	1.27754	0.00377631
CEBPB	K562	1.25754	1.64542e-16
MAFF	HepG2	1.2529	1.10555e-08
FOS	HeLa-S3	1.24725	2.54423e-05
JUN	HeLa-S3	1.21316	0.00838587
FOXK2	HepG2	1.19897	0.0179986
BCL6	HepG2	1.16856	0.000118649
NFIA	HepG2	1.15351	0.0229239
GFI1	HepG2	1.13977	0.00834126
PPARG	HepG2	1.13488	0.00626574
CEBPB	MCF-7	1.11961	0.0476389
IRF2	K562	1.11441	0.0089737
MEIS2	K562	1.11186	0.00443203
ZNF24	K562	1.10351	4.65902e-08
PITX1	HepG2	1.09069	0.105698
FOXK1	HepG2	1.08424	0.0775319
NR2F1	K562	1.08357	8.19488e-05
CUX1	MCF-7	1.08094	0.358733
TEAD4	MCF-7	1.06968	0.284278
SRF	MCF-7	1.0623	0.30599
TEAD4	K562	1.06196	0.0570116
MEF2D	HepG2	1.05237	0.228777
NFE2L2	HeLa-S3	1.05065	0.344136
MAFK	MCF-7	1.04794	0.297412
JUND	MCF-7	1.03016	0.281502
TEAD4	HepG2	1.01172	0.39219
TBX18	K562	1.01052	0.481893
ISL2	HepG2	1.00644	0.508346
ESRRA	K562	0.992883	0.604458
SMAD3	K562	0.986334	0.572397
MITF	K562	0.972277	0.956072
ATF2	K562	0.971341	0.912654
NFIB	HepG2	0.957853	0.744962
NFE2L2	HepG2	0.955723	0.771371
NFE2	HepG2	0.937105	0.778552
RELA	K562	0.935511	0.796366
ZNF24	HepG2	0.931955	0.95214
SPI1	K562	0.923497	0.999998
USF1	K562	0.918147	0.999824
SIX1	HepG2	0.914514	0.86245
ZKSCAN1	HeLa-S3	0.909519	0.730273
MAFK	HepG2	0.9012	0.999834
ZEB1	HepG2	0.890657	0.984657
TEAD1	K562	0.882019	0.991117
ZBTB12	K562	0.870815	0.90245
TCF7L2	HeLa-S3	0.867908	0.978594
ZNF384	K562	0.865456	1
ATF4	HepG2	0.844218	0.899822
ESRRB	K562	0.838384	0.759351
FOSL1	HepG2	0.836329	0.999999
NFIC	K562	0.833652	1
USF2	K562	0.831693	1
ATF3	K562	0.819483	1
ZNF460	HepG2	0.817376	1
PKNOX1	K562	0.815278	1
SRF	HepG2	0.810734	0.999613
NR2C1	K562	0.808451	1
TFAP4	HepG2	0.80583	1
IRF1	HepG2	0.804576	0.996249
NR2F2	MCF-7	0.79887	0.999602
ZBTB26	HepG2	0.797672	0.999998
MIXL1	HepG2	0.795725	0.997328
MAFK	HeLa-S3	0.79498	0.999969
ZKSCAN1	K562	0.780463	0.999985
RREB1	HepG2	0.764232	1
HOXA5	HepG2	0.757076	0.954198
TBX2	HepG2	0.752966	1
ZNF384	HepG2	0.752212	1
ATF2	HepG2	0.750142	1
DLX6	HepG2	0.746617	0.977954
NFE2L1	HepG2	0.742983	0.986807
SREBF2	K562	0.741567	0.943614
MGA	K562	0.721665	1
ZNF317	HepG2	0.705437	1
NR3C1	K562	0.697198	0.988925
JUN	K562	0.685738	1
ETV1	K562	0.68236	1
HEY1	K562	0.67977	0.96545
TBX3	HepG2	0.678218	0.999998
TFE3	K562	0.677051	1
ZKSCAN1	HepG2	0.671038	1
MXI1	K562	0.669172	1
RREB1	K562	0.660763	1
ESR1	MCF-7	0.64501	1
CLOCK	K562	0.63445	0.995734
MEIS2	HepG2	0.630832	1
HSF2	HepG2	0.626552	1
JUN	HepG2	0.609553	1
NFIB	MCF-7	0.601523	1
ZKSCAN5	HepG2	0.589901	1
TEAD2	K562	0.587905	1
GABPA	K562	0.586065	1
MEIS1	HepG2	0.585088	0.999982
USF1	HepG2	0.583734	1
TFCP2	K562	0.567509	0.999999
ZNF282	K562	0.551433	1
SMAD3	HepG2	0.545482	1
RFX7	K562	0.543816	0.962517
ETV6	K562	0.538225	1
ATF7	HepG2	0.537902	1
RFX1	K562	0.520095	1
ELF3	HepG2	0.509269	1
CREB1	HepG2	0.508503	1
IRF2	HepG2	0.505355	1
MNT	K562	0.498761	1
TP53	HepG2	0.49212	1
ETV4	HepG2	0.490069	1
TCF3	K562	0.48915	1
CREB3	K562	0.485537	1
USF2	HeLa-S3	0.481816	1
BHLHE40	K562	0.472412	1
MXI1	HepG2	0.466381	1
ESRRA	MCF-7	0.462592	1
MAX	K562	0.452793	1
ELF1	K562	0.45109	1
ATF7	K562	0.448215	1
SREBF1	K562	0.441167	1
E2F3	K562	0.438071	1
ZSCAN29	K562	0.437673	1
MAX	HepG2	0.427329	1
IRF5	HepG2	0.41188	1
ZSCAN29	HepG2	0.400245	1
TGIF2	HepG2	0.399646	1
MNT	HepG2	0.39884	1
NR2C2	HepG2	0.393334	1
SREBF1	MCF-7	0.390997	1
NRL	HepG2	0.389772	1
CREB1	K562	0.383237	1
MYBL2	K562	0.382365	1
PKNOX1	MCF-7	0.381561	1
ZKSCAN1	MCF-7	0.379727	1
RELA	HepG2	0.377358	1
RBPJ	HepG2	0.370291	1
USF2	HepG2	0.367884	1
REST	HeLa-S3	0.365323	1
NFATC3	HepG2	0.365247	1
NEUROD1	K562	0.36505	1
NR2C2	K562	0.365025	1
RFX1	MCF-7	0.36255	1
MTF1	HepG2	0.355662	1
SNAI1	HepG2	0.353579	1
CREB1	MCF-7	0.350369	1
ZNF24	MCF-7	0.349247	1
NKX3-1	HepG2	0.347422	0.999995
MNX1	HepG2	0.346275	1
ZBTB7B	HepG2	0.339163	1
ATF7	MCF-7	0.333028	1
GABPA	HepG2	0.330577	1
ZNF274	HepG2	0.330348	1
REST	HepG2	0.330305	1
HSF1	MCF-7	0.324633	1
SMAD5	K562	0.320095	1
CREB3L1	K562	0.319046	1
RFX5	HeLa-S3	0.308781	1
KLF6	K562	0.308	1
MYC	K562	0.307021	1
ZNF263	HepG2	0.306703	1
BHLHE40	HepG2	0.302198	1
ISX	HepG2	0.295844	0.999998
HES1	K562	0.295074	1
MXI1	HeLa-S3	0.293444	1
CLOCK	MCF-7	0.292686	1
ELF1	HepG2	0.290953	1
ELF4	K562	0.281659	1
ATF3	HepG2	0.28067	1
MLX	K562	0.279901	1
NFYB	K562	0.279443	1
ZNF263	K562	0.275907	1
ZNF143	K562	0.272478	1
MYBL2	HepG2	0.264162	1
E2F8	K562	0.263474	1
CREM	K562	0.261329	1
MAX	HeLa-S3	0.260322	1
REST	K562	0.255838	1
KLF16	K562	0.252644	1
TEAD2	HepG2	0.252478	1
CTCF	MCF-7	0.249385	1
ZBED1	K562	0.238786	1
NFYA	K562	0.238376	1
SOX18	HepG2	0.238008	1
VEZF1	K562	0.231624	1
ZNF740	K562	0.228647	1
REST	MCF-7	0.228154	1
MYC	HepG2	0.226533	1
JUN	MCF-7	0.22559	1
CTCF	HepG2	0.221973	1
MYC	HeLa-S3	0.220043	1
CTCF	HeLa-S3	0.218107	1
TFE3	HepG2	0.214234	1
NR2C2	HeLa-S3	0.213414	1
E2F1	HeLa-S3	0.208777	1
RFX1	HepG2	0.203038	1
THAP11	HepG2	0.20266	1
ZBTB7B	MCF-7	0.199144	1
CTCF	K562	0.198888	1
ZNF148	K562	0.196948	1
EGR1	K562	0.194596	1
ATF6	HepG2	0.192202	1
MLX	HepG2	0.19211	1
ZNF740	HepG2	0.189796	1
XBP1	HepG2	0.188642	1
NFKB2	HepG2	0.188149	1
E2F7	K562	0.185571	1
MNT	MCF-7	0.183327	1
RFX3	HepG2	0.179877	1
KLF13	K562	0.178618	1
YY1	K562	0.175931	1
ZNF143	HepG2	0.17571	1
ERF	K562	0.168938	1
TCF3	HepG2	0.168244	1
ETV5	K562	0.165874	1
MSX2	MCF-7	0.161951	1
ZBTB7A	HepG2	0.1602	1
NFYC	HepG2	0.158628	1
ATF6	K562	0.151055	1
ZBTB7A	K562	0.150087	1
CREM	HepG2	0.145311	1
MAZ	K562	0.14169	1
SPDEF	MCF-7	0.138166	1
ELF1	MCF-7	0.136705	1
KLF16	HepG2	0.131466	1
GABPA	HeLa-S3	0.130803	1
ZBTB33	K562	0.130773	1
HES1	MCF-7	0.129442	1
KLF4	MCF-7	0.128432	1
EGR1	HepG2	0.128405	1
OVOL1	MCF-7	0.12839	1
RFX5	MCF-7	0.127997	1
PRDM4	HepG2	0.127678	1
ETV5	HepG2	0.127394	1
ETS2	K562	0.125495	1
E2F6	K562	0.125447	1
HINFP	K562	0.125362	1
RFX5	K562	0.12374	1
KLF9	HepG2	0.120892	1
NFYB	HeLa-S3	0.120652	1
KLF13	HepG2	0.120444	1
NFYA	HeLa-S3	0.12033	1
TFDP1	K562	0.11598	1
NFYA	HepG2	0.114496	1
ERF	HepG2	0.114035	1
ELK3	K562	0.113295	1
E2F1	K562	0.112728	1
MYC	MCF-7	0.110163	1
NR3C1	HepG2	0.108995	1
CREB3	HepG2	0.108771	1
E2F8	MCF-7	0.108506	1
MAX	MCF-7	0.106421	1
RFX5	HepG2	0.103434	1
MAZ	HepG2	0.101713	1
SREBF2	HeLa-S3	0.100104	1
KLF6	HepG2	0.0965762	1
ELF2	K562	0.0951706	1
NFYB	HepG2	0.0933142	1
ZBTB33	MCF-7	0.0926588	1
NRF1	K562	0.0924273	1
E2F1	MCF-7	0.0920488	1
KLF11	HepG2	0.0902206	1
GABPA	MCF-7	0.0881776	1
HINFP	HepG2	0.087563	1
CTCFL	K562	0.0874639	1
ETS1	K562	0.0817155	1
LBX2	HepG2	0.075691	1
MAZ	HeLa-S3	0.0751945	1
THAP1	K562	0.073018	1
ZBTB33	HepG2	0.0725084	1
ZNF143	HeLa-S3	0.0722052	1
ETS1	HepG2	0.0712804	1
EGR1	MCF-7	0.0681366	1
ETV6	HepG2	0.0654941	1
TCFL5	K562	0.0647392	1
YY1	HepG2	0.0638763	1
ELF4	HepG2	0.0614273	1
KLF9	MCF-7	0.0606776	1
E2F2	HepG2	0.0601033	1
E2F4	HepG2	0.0597386	1
ZBTB14	HepG2	0.0564885	1
TFDP1	HepG2	0.055656	1
IRF3	HepG2	0.0544974	1
GMEB2	HepG2	0.0544973	1
SP1	K562	0.0516237	1
ELK1	K562	0.0467395	1
MAZ	MCF-7	0.0460646	1
E2F6	HeLa-S3	0.0453012	1
NRF1	HepG2	0.0446441	1
SP2	K562	0.0431747	1
ELK4	HeLa-S3	0.0424925	1
SP2	HepG2	0.0423202	1
FOXK2	MCF-7	0.0414754	1
E2F1	HepG2	0.0407403	1
SP1	HepG2	0.0370896	1
E2F4	HeLa-S3	0.0356038	1
ELK1	HepG2	0.0326298	1
ELK1	HeLa-S3	0.0313037	1
ELK4	HepG2	0.0253804	1
E2F4	K562	0.0205493	1
E2F4	MCF-7	0.0130706	1
SP1	MCF-7	0.01212	1
NRF1	MCF-7	0.0107319	1
NRF1	HeLa-S3	0.00985464	1
ELK1	MCF-7	0.00916481	1

## Sheet: 0.2_0.8
TF_name	Cell_line	Enrichment Score	p_value
GATA2	K562	6.38618	0
GATA1	K562	6.15333	2.72868e-131
GATA2	HepG2	4.50519	3.59046e-73
LEF1	K562	4.47877	7.67969e-168
FOXA1	K562	4.26512	1.04563e-16
STAT3	HeLa-S3	4.24938	3.05342e-28
HNF1A	HepG2	4.08707	1.31437e-166
HNF4A	HepG2	3.63554	0
TCF7	HepG2	3.51175	6.72226e-93
HNF4G	HepG2	3.3203	1.44279e-165
KLF10	K562	3.30773	1.26959e-05
MEF2D	K562	3.11299	2.65915e-74
CEBPA	HepG2	2.94989	9.5152e-167
RUNX1	K562	2.92849	4.07375e-24
CEBPD	HepG2	2.83933	1.69556e-65
MAFG	K562	2.79034	3.18892e-245
FOXA1	MCF-7	2.77577	2.69232e-61
FOXA1	HepG2	2.76305	1.42303e-197
NFE2L1	K562	2.74968	2.56521e-91
TCF7L2	HepG2	2.72599	4.87979e-134
NR2F2	HepG2	2.696	1.97599e-48
FOXA3	K562	2.61335	2.66456e-65
CEBPB	HeLa-S3	2.57561	5.12004e-43
IRF9	K562	2.57308	2.67633e-23
GATA4	HepG2	2.53672	6.70999e-15
MEF2A	K562	2.50577	4.58537e-47
SOX13	HepG2	2.43031	2.54872e-51
FOXP1	HepG2	2.38286	1.18115e-69
MAFF	K562	2.35388	1.56236e-99
ONECUT2	HepG2	2.32715	4.90316e-26
NFE2	K562	2.28186	6.89313e-181
JUND	HeLa-S3	2.27044	1.21366e-130
FOXA2	HepG2	2.25571	3.38834e-142
BACH1	K562	2.20435	2.95246e-134
DBP	HepG2	2.20024	0.0669604
THRB	HepG2	2.15065	1.49824e-28
GATA3	MCF-7	2.13793	5.19331e-15
JUNB	K562	2.06492	2.40132e-195
SRF	K562	2.04529	2.23484e-44
RXRB	HepG2	2.03032	3.57569e-55
FOXA3	HepG2	2.00836	5.10903e-65
JUND	K562	1.97486	0
MEF2A	HepG2	1.95046	1.77684e-12
RARA	HepG2	1.94657	3.2909e-71
CEBPG	HepG2	1.92421	2.9017e-38
FOS	K562	1.91386	1.19825e-42
MAFK	K562	1.90392	1.75284e-133
FOSL1	K562	1.88973	0
PBX2	K562	1.86893	1.85222e-62
NR4A1	K562	1.86738	8.20341e-26
NFIC	HepG2	1.85591	2.39489e-10
NR5A1	HepG2	1.80674	2.47088e-55
NFIL3	HepG2	1.79571	2.11556e-33
FOS	MCF-7	1.77658	1.11315e-83
FOSL2	MCF-7	1.76172	1.09186e-43
NFATC3	K562	1.7602	6.72446e-16
NR2F2	K562	1.75475	1.1239e-33
ONECUT1	HepG2	1.71557	4.51315e-58
PBX2	HepG2	1.70451	0.00366382
CEBPB	HepG2	1.67829	1.45894e-32
FOXO4	K562	1.65011	0.163438
RBPJ	K562	1.63136	0.00235998
NR2F1	HepG2	1.61368	5.26511e-40
TEF	HepG2	1.61173	1.04847e-06
PRDM1	HeLa-S3	1.59716	0.000475701
HNF1B	HepG2	1.55129	3.21872e-13
HMBOX1	K562	1.54506	7.96766e-14
BCL6	K562	1.4951	0.00539242
NFIX	K562	1.45999	0.0100795
FOSL2	HepG2	1.45543	4.87695e-62
JUND	HepG2	1.44442	2.41505e-57
ATF4	K562	1.43764	1.65032e-41
TCF7L2	MCF-7	1.42074	1.08686e-05
ESRRA	HepG2	1.41942	9.26073e-14
HLF	HepG2	1.40773	1.74314e-35
ZNF274	K562	1.40259	0.0467771
MAFF	HeLa-S3	1.3776	2.27073e-05
TEAD1	HepG2	1.35739	6.93259e-15
FOXK2	K562	1.35162	5.13481e-16
CEBPG	MCF-7	1.34895	0.000250908
IKZF1	K562	1.34772	1.50295e-54
TCF7L2	K562	1.3343	0.0227599
IRF1	K562	1.30689	1.73927e-40
TCF7	K562	1.30479	0.00140351
ZNF652	HepG2	1.29729	5.29079e-06
CEBPG	K562	1.29452	9.21342e-13
CUX1	K562	1.2914	0.00254297
MAFG	HepG2	1.27987	0.00354202
CEBPB	K562	1.26157	5.82147e-17
MAFF	HepG2	1.25435	9.2654e-09
FOS	HeLa-S3	1.2483	2.37372e-05
JUN	HeLa-S3	1.21508	0.00792297
FOXK2	HepG2	1.20302	0.0162375
BCL6	HepG2	1.16701	0.000134495
NFIA	HepG2	1.15227	0.023783
GFI1	HepG2	1.13775	0.00913131
PPARG	HepG2	1.13388	0.00658811
ZNF24	K562	1.13074	1.04028e-11
CEBPB	MCF-7	1.11979	0.0473956
MEIS2	K562	1.114	0.00381862
IRF2	K562	1.10666	0.0135275
PITX1	HepG2	1.09061	0.105864
FOXK1	HepG2	1.08932	0.0658317
NR2F1	K562	1.08422	7.23365e-05
CUX1	MCF-7	1.07825	0.364487
TEAD4	MCF-7	1.07043	0.282018
SRF	MCF-7	1.0616	0.308249
TEAD4	K562	1.06038	0.0616198
MEF2D	HepG2	1.05195	0.230642
NFE2L2	HeLa-S3	1.04829	0.352128
MAFK	MCF-7	1.04616	0.304881
JUND	MCF-7	1.03047	0.279425
TBX18	K562	1.02345	0.430762
TEAD4	HepG2	1.0146	0.364399
ISL2	HepG2	1.00328	0.519094
ESRRA	K562	0.993292	0.599025
RELA	K562	0.990853	0.563435
SMAD3	K562	0.979475	0.589935
MITF	K562	0.968896	0.972379
ATF2	K562	0.967722	0.936953
NFE2L2	HepG2	0.961179	0.744028
NFIB	HepG2	0.954846	0.759036
NFE2	HepG2	0.938408	0.77409
ZNF24	HepG2	0.929029	0.958919
SPI1	K562	0.922141	0.999999
USF1	K562	0.915743	0.999885
SIX1	HepG2	0.911644	0.870204
ZKSCAN1	HeLa-S3	0.911381	0.726857
MAFK	HepG2	0.902167	0.999809
ZEB1	HepG2	0.890945	0.984438
TEAD1	K562	0.887967	0.987764
TCF7L2	HeLa-S3	0.874599	0.972612
ZBTB12	K562	0.864759	0.91257
ZNF384	K562	0.86387	1
ATF4	HepG2	0.841569	0.903558
FOSL1	HepG2	0.83541	0.999999
NFIC	K562	0.832572	1
ESRRB	K562	0.832554	0.765279
USF2	K562	0.827856	1
ZNF460	HepG2	0.820221	1
ATF3	K562	0.816057	1
PKNOX1	K562	0.813241	1
NR2C1	K562	0.811234	1
TFAP4	HepG2	0.808748	1
SRF	HepG2	0.808189	0.999675
IRF1	HepG2	0.802051	0.99664
NR2F2	MCF-7	0.800774	0.99955
ZBTB26	HepG2	0.797218	0.999998
MAFK	HeLa-S3	0.796421	0.999965
MIXL1	HepG2	0.793227	0.997613
ZKSCAN1	K562	0.780393	0.999986
RREB1	HepG2	0.763437	1
TBX2	HepG2	0.758881	1
HOXA5	HepG2	0.754699	0.95582
ZNF384	HepG2	0.753338	1
ATF2	HepG2	0.752386	1
DLX6	HepG2	0.744273	0.978974
NFE2L1	HepG2	0.740651	0.987523
SREBF2	K562	0.73641	0.947293
MGA	K562	0.718789	1
ZNF317	HepG2	0.706783	1
NR3C1	K562	0.69235	0.990066
TBX3	HepG2	0.682052	0.999997
ETV1	K562	0.681002	1
JUN	K562	0.680968	1
TFE3	K562	0.675723	1
HEY1	K562	0.675043	0.967641
ZKSCAN1	HepG2	0.671905	1
MXI1	K562	0.664519	1
RREB1	K562	0.659025	1
ESR1	MCF-7	0.648953	1
MEIS2	HepG2	0.630499	1
CLOCK	K562	0.630039	0.996179
HSF2	HepG2	0.62891	1
JUN	HepG2	0.611	1
NFIB	MCF-7	0.602991	1
TEAD2	K562	0.594044	1
ZKSCAN5	HepG2	0.593166	1
GABPA	K562	0.587926	1
USF1	HepG2	0.583704	1
MEIS1	HepG2	0.583252	0.999984
TFCP2	K562	0.563563	1
SMAD3	HepG2	0.552995	1
ZNF282	K562	0.547598	1
RFX7	K562	0.540035	0.963891
ATF7	HepG2	0.539368	1
ETV6	K562	0.538191	1
RFX1	K562	0.51848	1
ELF3	HepG2	0.510412	1
CREB1	HepG2	0.508717	1
IRF2	HepG2	0.503769	1
MNT	K562	0.496034	1
TP53	HepG2	0.493716	1
ETV4	HepG2	0.491255	1
TCF3	K562	0.488945	1
USF2	HeLa-S3	0.482289	1
CREB3	K562	0.482161	1
BHLHE40	K562	0.472968	1
MXI1	HepG2	0.464917	1
ESRRA	MCF-7	0.463564	1
MAX	K562	0.450208	1
ELF1	K562	0.449648	1
ATF7	K562	0.447279	1
SREBF1	K562	0.4381	1
E2F3	K562	0.435025	1
ZSCAN29	K562	0.434629	1
MAX	HepG2	0.430149	1
IRF5	HepG2	0.410587	1
ZSCAN29	HepG2	0.401252	1
MNT	HepG2	0.400281	1
TGIF2	HepG2	0.399688	1
NR2C2	HepG2	0.394169	1
SREBF1	MCF-7	0.392964	1
NRL	HepG2	0.392866	1
RELA	HepG2	0.388459	1
CREB1	K562	0.382499	1
PKNOX1	MCF-7	0.382235	1
MYBL2	K562	0.379706	1
ZKSCAN1	MCF-7	0.37878	1
NFATC3	HepG2	0.374504	1
RBPJ	HepG2	0.370368	1
USF2	HepG2	0.367669	1
NR2C2	K562	0.365942	1
REST	HeLa-S3	0.365692	1
RFX1	MCF-7	0.362724	1
NEUROD1	K562	0.362511	1
NKX3-1	HepG2	0.359913	0.999991
SNAI1	HepG2	0.358831	1
MTF1	HepG2	0.354545	1
CREB1	MCF-7	0.350597	1
ZNF24	MCF-7	0.349137	1
MNX1	HepG2	0.345189	1
ZBTB7B	HepG2	0.340925	1
SMAD5	K562	0.339298	1
ZNF274	HepG2	0.333219	1
REST	HepG2	0.333116	1
ATF7	MCF-7	0.333058	1
GABPA	HepG2	0.331241	1
HSF1	MCF-7	0.323824	1
MLX	K562	0.317663	1
CREB3L1	K562	0.316827	1
RFX5	HeLa-S3	0.311346	1
ZNF263	HepG2	0.307682	1
KLF6	K562	0.307365	1
MYC	K562	0.307076	1
BHLHE40	HepG2	0.302459	1
MXI1	HeLa-S3	0.295089	1
ISX	HepG2	0.294915	0.999998
HES1	K562	0.293022	1
CLOCK	MCF-7	0.291956	1
ELF1	HepG2	0.291149	1
ELF4	K562	0.280484	1
ATF3	HepG2	0.279789	1
NFYB	K562	0.278597	1
ZNF263	K562	0.275129	1
ZNF143	K562	0.270583	1
MAX	HeLa-S3	0.264013	1
MYBL2	HepG2	0.263333	1
CREM	K562	0.262544	1
E2F8	K562	0.261642	1
TEAD2	HepG2	0.259937	1
REST	K562	0.257237	1
KLF16	K562	0.254859	1
CTCF	MCF-7	0.249515	1
SOX18	HepG2	0.23726	1
ZBED1	K562	0.237126	1
NFYA	K562	0.236718	1
VEZF1	K562	0.233248	1
ZNF740	K562	0.229186	1
MYC	HepG2	0.227869	1
REST	MCF-7	0.227585	1
JUN	MCF-7	0.225712	1
CTCF	HepG2	0.222213	1
MYC	HeLa-S3	0.221245	1
CTCF	HeLa-S3	0.218428	1
TFE3	HepG2	0.214003	1
NR2C2	HeLa-S3	0.213666	1
E2F1	HeLa-S3	0.20912	1
THAP11	HepG2	0.203048	1
RFX1	HepG2	0.203033	1
ZBTB7B	MCF-7	0.199728	1
ZNF148	K562	0.198834	1
CTCF	K562	0.198622	1
EGR1	K562	0.194961	1
MLX	HepG2	0.192121	1
ATF6	HepG2	0.191598	1
ZNF740	HepG2	0.190587	1
XBP1	HepG2	0.18805	1
NFKB2	HepG2	0.187559	1
E2F7	K562	0.184281	1
MNT	MCF-7	0.183901	1
KLF13	K562	0.179567	1
RFX3	HepG2	0.179312	1
ZNF143	HepG2	0.176966	1
YY1	K562	0.174707	1
ERF	K562	0.173685	1
TCF3	HepG2	0.172809	1
ETV5	K562	0.165495	1
ATF6	K562	0.165005	1
MSX2	MCF-7	0.163846	1
ZBTB7A	HepG2	0.160624	1
NFYC	HepG2	0.159509	1
ZBTB7A	K562	0.150214	1
CREM	HepG2	0.145633	1
MAZ	K562	0.142085	1
SPDEF	MCF-7	0.139073	1
ELF1	MCF-7	0.13704	1
GABPA	HeLa-S3	0.131662	1
KLF16	HepG2	0.131441	1
ZBTB33	K562	0.129863	1
EGR1	HepG2	0.129131	1
HES1	MCF-7	0.129119	1
KLF4	MCF-7	0.128982	1
ETV5	HepG2	0.128181	1
OVOL1	MCF-7	0.12807	1
RFX5	MCF-7	0.127773	1
HINFP	K562	0.12749	1
PRDM4	HepG2	0.127277	1
E2F6	K562	0.126448	1
ETS2	K562	0.124622	1
RFX5	K562	0.12288	1
KLF9	HepG2	0.121017	1
NFYB	HeLa-S3	0.120829	1
NFYA	HeLa-S3	0.120639	1
KLF13	HepG2	0.120066	1
TFDP1	K562	0.116201	1
NFYA	HepG2	0.114722	1
ERF	HepG2	0.114107	1
E2F1	K562	0.113908	1
ELK3	K562	0.112507	1
MYC	MCF-7	0.110273	1
NR3C1	HepG2	0.108653	1
CREB3	HepG2	0.108429	1
E2F8	MCF-7	0.108236	1
SREBF2	HeLa-S3	0.107938	1
MAX	MCF-7	0.106548	1
RFX5	HepG2	0.10311	1
MAZ	HepG2	0.102006	1
KLF6	HepG2	0.0967948	1
ZBTB33	MCF-7	0.0947261	1
ELF2	K562	0.0945087	1
NFYB	HepG2	0.0940999	1
NRF1	K562	0.0933621	1
E2F1	MCF-7	0.0921608	1
KLF11	HepG2	0.0907193	1
GABPA	MCF-7	0.0886604	1
HINFP	HepG2	0.0872882	1
CTCFL	K562	0.0868556	1
ETS1	K562	0.0824898	1
MAZ	HeLa-S3	0.0776515	1
THAP1	K562	0.0767756	1
LBX2	HepG2	0.0754534	1
ZBTB33	HepG2	0.0722808	1
ZNF143	HeLa-S3	0.072269	1
ETS1	HepG2	0.0710567	1
EGR1	MCF-7	0.068279	1
ETV6	HepG2	0.0652885	1
TCFL5	K562	0.064289	1
YY1	HepG2	0.0641242	1
ELF4	HepG2	0.0612345	1
KLF9	MCF-7	0.0609455	1
E2F4	HepG2	0.0605104	1
E2F2	HepG2	0.0599147	1
ZBTB14	HepG2	0.0567942	1
TFDP1	HepG2	0.0564436	1
IRF3	HepG2	0.0543264	1
GMEB2	HepG2	0.0543262	1
SP1	K562	0.0522618	1
ELK1	K562	0.0464145	1
MAZ	MCF-7	0.0462084	1
E2F6	HeLa-S3	0.0459191	1
NRF1	HepG2	0.0445809	1
ELK4	HeLa-S3	0.0431791	1
SP2	K562	0.0428745	1
SP2	HepG2	0.0423955	1
FOXK2	MCF-7	0.041372	1
E2F1	HepG2	0.0406124	1
SP1	HepG2	0.0371694	1
E2F4	HeLa-S3	0.0354619	1
ELK1	HepG2	0.0330365	1
ELK1	HeLa-S3	0.031342	1
ELK4	HepG2	0.0253007	1
E2F4	K562	0.0204064	1
E2F4	MCF-7	0.013038	1
SP1	MCF-7	0.0120898	1
NRF1	MCF-7	0.0107543	1
NRF1	HeLa-S3	0.00981534	1
ELK1	MCF-7	0.00914196	1

## Sheet: 0_0.9
TF_name	Cell_line	Enrichment Score	p_value
HNF1A	HepG2	10.4428	1.59142e-247
FOXA1	K562	7.32205	4.68833e-20
GATA1	K562	7.06476	1.9785e-121
GATA2	K562	6.62068	0
STAT3	HeLa-S3	5.19107	4.09257e-28
LEF1	K562	5.18619	1.1596e-161
GATA2	HepG2	4.54992	4.27547e-66
HNF4G	HepG2	4.03495	3.55015e-179
HNF4A	HepG2	3.85593	5.59081059232026e-314
TCF7	HepG2	3.79816	6.24342e-90
TCF7L2	HepG2	3.75922	2.9425e-173
CEBPD	HepG2	3.543	1.6252e-75
FOXA3	K562	3.52468	2.83046e-82
RUNX1	K562	3.5192	6.6804e-26
CEBPA	HepG2	3.43102	3.98125e-178
IRF9	K562	3.17492	1.03781e-26
NR2F2	HepG2	3.17189	3.39432e-53
MEF2D	K562	3.09968	1.01458e-64
THRB	HepG2	2.98931	4.60075e-42
FOXA1	HepG2	2.93874	1.13489e-192
NFIC	HepG2	2.90781	2.12264e-19
FOXA1	MCF-7	2.82855	1.70797e-56
MAFG	K562	2.82564	5.79475e-218
CEBPB	HeLa-S3	2.71903	1.8364e-40
ONECUT2	HepG2	2.66154	8.96851e-29
MAFF	K562	2.64505	7.44487e-105
NFE2L1	K562	2.47441	9.51002e-69
MEF2A	K562	2.46572	3.98583e-40
KLF10	K562	2.45294	0.00166377
FOXA2	HepG2	2.40285	6.84456e-143
CEBPG	HepG2	2.38725	1.81641e-52
SMAD3	K562	2.38212	5.20674e-05
BACH1	K562	2.36204	5.75496e-133
RXRB	HepG2	2.33547	7.0065e-65
FOXP1	HepG2	2.29052	1.13419e-58
SOX13	HepG2	2.28108	1.0013e-41
GATA4	HepG2	2.27005	1.59849e-11
NFE2	K562	2.26699	5.37981e-156
JUND	HeLa-S3	2.21076	2.5516e-108
PBX2	K562	2.20872	3.55059e-79
CEBPB	HepG2	2.15842	5.79501e-54
TEF	HepG2	2.14123	1.98057e-11
NR2F2	K562	2.11381	1.23811e-45
JUNB	K562	2.11237	1.92575e-179
HMBOX1	K562	2.11105	3.8355e-27
TCF7L2	K562	2.10591	8.51159e-06
HNF1B	HepG2	2.10032	3.40674e-26
GATA3	MCF-7	2.0921	4.42889e-13
NR4A1	K562	2.08474	1.07344e-28
MEF2A	HepG2	2.04701	2.05825e-12
JUND	K562	2.04687	4.60816e-292
RARA	HepG2	2.02618	6.27344e-70
FOXA3	HepG2	2.01167	8.26221e-59
SRF	K562	1.99282	7.08272e-37
DBP	HepG2	1.98118	0.109673
NR5A1	HepG2	1.97626	5.06813e-62
FOS	K562	1.95659	2.5827e-39
IRF1	HepG2	1.95356	6.10429e-09
FOSL2	MCF-7	1.92836	1.97975e-49
FOSL1	K562	1.90887	2.43722583093487e-320
NFIL3	HepG2	1.87547	9.87816e-34
MAFK	K562	1.85471	5.56475e-109
BCL6	K562	1.82844	0.000479251
NFATC3	K562	1.82713	2.20393e-15
ONECUT1	HepG2	1.82274	4.20664e-62
FOS	MCF-7	1.80981	5.04449e-79
PRDM1	HeLa-S3	1.77064	0.000144892
TCF7L2	MCF-7	1.75887	6.96162e-10
NR2F1	HepG2	1.72491	1.87563e-44
ATF4	K562	1.68322	1.91997e-66
HLF	HepG2	1.63016	4.64993e-58
IKZF1	K562	1.60854	2.39161e-106
TBX18	K562	1.54797	0.000194571
NR3C1	K562	1.54516	0.0356131
TEAD1	HepG2	1.52556	1.04117e-22
FOXK2	K562	1.52265	2.24329e-24
FOSL2	HepG2	1.51656	6.90479e-67
JUND	HepG2	1.5026	1.11104e-61
PBX2	HepG2	1.48589	0.0281609
ESRRA	HepG2	1.48068	7.2835e-15
ZNF652	HepG2	1.45123	4.84538e-09
CEBPG	K562	1.44317	8.36625e-20
FOXO4	K562	1.41639	0.279874
CEBPG	MCF-7	1.40822	0.000101012
MEF2D	HepG2	1.40266	4.10968e-06
CEBPB	K562	1.39062	1.02168e-26
JUN	HeLa-S3	1.37994	0.000172329
RELA	K562	1.37738	0.00117412
NFE2L1	HepG2	1.33384	0.0659017
ZNF24	K562	1.32871	1.1878e-42
IRF1	K562	1.29771	3.72204e-34
MAFF	HepG2	1.2918	1.21585e-09
MAFG	HepG2	1.29173	0.00425128
CUX1	K562	1.27476	0.00630632
CEBPB	MCF-7	1.26814	0.000639209
RBPJ	K562	1.25544	0.1151
NFIX	K562	1.25319	0.0936744
MAFF	HeLa-S3	1.25056	0.00331796
BCL6	HepG2	1.24918	5.18284e-07
NFIA	HepG2	1.24128	0.00241246
MEIS2	K562	1.23768	8.58488e-07
NR2F1	K562	1.22122	1.16961e-17
USF1	K562	1.21401	2.07755e-12
ZNF274	K562	1.20393	0.198402
FOS	HeLa-S3	1.19543	0.0010204
MITF	K562	1.16479	1.89198e-16
TEAD4	HepG2	1.15997	0.000300513
FOXK2	HepG2	1.15963	0.0516688
PITX1	HepG2	1.1557	0.0249052
GFI1	HepG2	1.15398	0.00665068
ISL2	HepG2	1.15366	0.152666
SPI1	K562	1.13651	3.18066e-11
TCF7	K562	1.11997	0.111628
JUND	MCF-7	1.10789	0.0280695
ESRRA	K562	1.10128	0.00131035
IRF2	K562	1.09984	0.0260179
TEAD4	K562	1.09579	0.0129687
TEAD4	MCF-7	1.09338	0.234824
ZBTB12	K562	1.08161	0.297574
ZNF384	K562	1.07686	4.56228e-15
ATF2	K562	1.07621	0.00109049
NR2C1	K562	1.07416	0.0299226
RREB1	K562	1.06	0.0671333
NFIB	HepG2	1.05409	0.260743
FOXK1	HepG2	1.05151	0.203527
ZEB1	HepG2	1.03621	0.290914
USF2	K562	1.03605	0.0716263
SIX1	HepG2	1.02897	0.405063
NFE2	HepG2	1.01574	0.462986
PPARG	HepG2	1.01174	0.422241
TCF7L2	HeLa-S3	1.00691	0.487401
ATF3	K562	1.00252	0.471119
CUX1	MCF-7	0.968202	0.619334
SRF	MCF-7	0.951255	0.705107
MAFK	MCF-7	0.938998	0.795715
NFIC	K562	0.931027	0.960914
NFE2L2	HepG2	0.930262	0.867994
PKNOX1	K562	0.927365	0.999715
SRF	HepG2	0.916114	0.904279
NFE2L2	HeLa-S3	0.909106	0.831021
ZKSCAN1	K562	0.895289	0.954559
TFE3	K562	0.883244	0.997164
MAFK	HepG2	0.882262	0.999981
FOSL1	HepG2	0.873558	0.999564
ZNF384	HepG2	0.873011	1
HEY1	K562	0.869147	0.755464
SREBF2	K562	0.869147	0.774053
ZNF460	HepG2	0.867477	1
ZNF24	HepG2	0.854166	0.99983
ETV1	K562	0.845455	1
TFAP4	HepG2	0.839009	1
MXI1	K562	0.824164	0.982933
ZNF317	HepG2	0.814521	0.999908
HOXA5	HepG2	0.800045	0.90185
TBX2	HepG2	0.799883	0.999996
ATF2	HepG2	0.79738	1
TEAD1	K562	0.794475	0.999985
ZKSCAN1	HeLa-S3	0.788676	0.905981
JUN	K562	0.783919	1
ETS2	K562	0.772575	0.817888
MGA	K562	0.770568	1
ZBTB26	HepG2	0.765762	1
MAFK	HeLa-S3	0.762763	0.999996
ATF4	HepG2	0.757781	0.977791
DLX6	HepG2	0.745997	0.972028
RREB1	HepG2	0.744924	1
GABPA	K562	0.731312	1
ZKSCAN1	HepG2	0.731088	0.999921
NR2F2	MCF-7	0.729747	0.999998
TBX3	HepG2	0.72876	0.999755
MEIS2	HepG2	0.718703	0.999984
ESRRB	K562	0.714632	0.872103
ETV6	K562	0.70892	1
MIXL1	HepG2	0.706145	0.999983
HSF2	HepG2	0.685117	1
USF1	HepG2	0.679046	1
CLOCK	K562	0.676002	0.982804
USF2	HeLa-S3	0.659806	1
ESR1	MCF-7	0.659561	1
ZNF282	K562	0.659519	1
SREBF1	K562	0.645271	0.999798
JUN	HepG2	0.632103	1
MEIS1	HepG2	0.630221	0.999555
NFIB	MCF-7	0.624579	1
NKX3-1	HepG2	0.619627	0.955753
TP53	HepG2	0.615315	1
TCF3	K562	0.605645	1
ZSCAN29	K562	0.59761	1
MNT	K562	0.593867	1
ATF7	HepG2	0.588209	1
TFCP2	K562	0.585864	0.99999
SMAD3	HepG2	0.584784	0.999998
ZKSCAN5	HepG2	0.583452	1
TEAD2	K562	0.58025	1
ZKSCAN1	MCF-7	0.567553	0.997595
ELF1	K562	0.567511	1
RFX1	K562	0.551958	1
CREB1	HepG2	0.549489	1
ELF3	HepG2	0.546649	1
ETV4	HepG2	0.544701	1
IRF2	HepG2	0.541481	1
BHLHE40	K562	0.540951	1
MTF1	HepG2	0.522911	0.999995
ATF7	K562	0.521045	1
MAX	K562	0.511957	1
CREB3	K562	0.504526	1
MXI1	HepG2	0.494026	1
KLF6	K562	0.492138	1
CREB1	K562	0.478256	1
MAX	HepG2	0.478031	1
IRF5	HepG2	0.4683	1
ESRRA	MCF-7	0.465328	1
SMAD5	K562	0.464582	1
RFX7	K562	0.463545	0.984845
NR2C2	K562	0.453809	1
NEUROD1	K562	0.453343	1
USF2	HepG2	0.451341	1
SREBF1	MCF-7	0.437107	1
MYBL2	K562	0.434568	1
E2F7	K562	0.431588	1
NR2C2	HepG2	0.42138	1
RELA	HepG2	0.421289	1
MNT	HepG2	0.416277	1
REST	HeLa-S3	0.405736	1
NFATC3	HepG2	0.405501	0.999999
ZSCAN29	HepG2	0.397924	1
RBPJ	HepG2	0.39252	1
MLX	K562	0.386284	1
PKNOX1	MCF-7	0.385698	1
SNAI1	HepG2	0.384451	1
ZBTB7B	HepG2	0.381553	1
GABPA	HepG2	0.381063	1
ZNF274	HepG2	0.378146	1
CREB3L1	K562	0.377057	1
MYBL2	HepG2	0.373018	1
TGIF2	HepG2	0.367491	1
HES1	K562	0.360517	1
NRL	HepG2	0.359383	1
MYC	K562	0.359379	1
RFX1	MCF-7	0.356496	1
MNX1	HepG2	0.355225	1
ELF4	K562	0.350179	1
ZNF24	MCF-7	0.349453	1
BHLHE40	HepG2	0.347945	1
REST	HepG2	0.34398	1
NFYB	K562	0.341502	1
CREB1	MCF-7	0.329308	1
ZNF263	K562	0.321856	1
ERF	K562	0.319807	1
ZNF263	HepG2	0.319807	1
ELF1	HepG2	0.315065	1
ATF3	HepG2	0.313535	1
CREM	K562	0.309236	1
ATF7	MCF-7	0.307569	1
CLOCK	MCF-7	0.305423	1
ZNF143	K562	0.302222	1
MXI1	HeLa-S3	0.300329	1
SOX18	HepG2	0.299096	1
HSF1	MCF-7	0.29112	1
RFX5	HeLa-S3	0.290891	1
E2F8	K562	0.286135	1
ZNF740	K562	0.284736	1
MAX	HeLa-S3	0.279481	1
VEZF1	K562	0.277831	1
NFYA	K562	0.277123	1
KLF16	K562	0.27061	1
ISX	HepG2	0.265553	1
YY1	K562	0.259612	1
TFE3	HepG2	0.259603	1
REST	K562	0.258571	1
MYC	HepG2	0.257438	1
NR2C2	HeLa-S3	0.247499	1
ZNF148	K562	0.246921	1
MYC	HeLa-S3	0.24504	1
EGR1	K562	0.240051	1
ATF6	HepG2	0.239474	1
KLF13	K562	0.239376	1
CTCF	MCF-7	0.238892	1
ETV5	K562	0.232503	1
TEAD2	HepG2	0.226627	1
ZBED1	K562	0.224238	1
MLX	HepG2	0.218632	1
CTCF	HepG2	0.213614	1
THAP11	HepG2	0.21095	1
RFX1	HepG2	0.208307	1
CTCF	HeLa-S3	0.206902	1
REST	MCF-7	0.206307	1
JUN	MCF-7	0.20624	1
NFKB2	HepG2	0.205223	1
ZBTB7B	MCF-7	0.204672	1
ZNF143	HepG2	0.202518	1
ZNF740	HepG2	0.201089	1
PRDM4	HepG2	0.200561	1
ELK3	K562	0.193144	0.999848
ZBTB7A	HepG2	0.189315	1
MNT	MCF-7	0.188705	1
CTCF	K562	0.187302	1
ZBTB7A	K562	0.186634	1
RFX3	HepG2	0.183432	1
E2F1	HeLa-S3	0.181587	1
ZBTB33	K562	0.18115	1
SREBF2	HeLa-S3	0.174137	0.999993
CREM	HepG2	0.173602	1
ATF6	K562	0.173158	1
TCF3	HepG2	0.171369	1
XBP1	HepG2	0.169327	1
NFYA	HeLa-S3	0.168518	1
MAZ	K562	0.168492	1
NFYC	HepG2	0.166984	1
HINFP	K562	0.165591	1
TFDP1	K562	0.162197	1
KLF4	MCF-7	0.160296	1
E2F6	K562	0.159781	1
SPDEF	MCF-7	0.146634	1
ELF1	MCF-7	0.146438	1
GABPA	HeLa-S3	0.146292	1
KLF13	HepG2	0.145249	1
MSX2	MCF-7	0.145232	1
E2F1	K562	0.143798	1
EGR1	HepG2	0.142271	1
ETV5	HepG2	0.141979	1
NFYB	HeLa-S3	0.141056	1
KLF16	HepG2	0.140786	1
OVOL1	MCF-7	0.134552	1
TCFL5	K562	0.128762	1
KLF9	HepG2	0.12719	1
RFX5	MCF-7	0.124464	1
ERF	HepG2	0.124031	1
ELF2	K562	0.123253	1
RFX5	K562	0.118605	1
NFYA	HepG2	0.11766	1
HES1	MCF-7	0.116079	1
NRF1	K562	0.115875	1
MYC	MCF-7	0.114251	1
MAZ	HepG2	0.113036	1
ETS1	K562	0.110728	1
MAX	MCF-7	0.109067	1
CREB3	HepG2	0.108817	1
E2F1	MCF-7	0.108272	1
KLF6	HepG2	0.106253	1
ZBTB33	MCF-7	0.105282	1
KLF11	HepG2	0.102335	1
RFX5	HepG2	0.102333	1
HINFP	HepG2	0.102135	1
GABPA	MCF-7	0.0982056	1
NR3C1	HepG2	0.0978355	1
E2F8	MCF-7	0.0973048	1
MAZ	HeLa-S3	0.09533	1
NFYB	HepG2	0.094577	1
CTCFL	K562	0.0910185	1
THAP1	K562	0.0869724	1
EGR1	MCF-7	0.0869619	1
ZNF143	HeLa-S3	0.0816454	1
ZBTB33	HepG2	0.080039	1
KLF9	MCF-7	0.0737006	1
ETV6	HepG2	0.072713	1
ETS1	HepG2	0.0711138	1
YY1	HepG2	0.0684974	1
LBX2	HepG2	0.0679412	1
GMEB2	HepG2	0.0652235	1
ELF4	HepG2	0.0640208	1
ELK1	K562	0.063673	1
ZBTB14	HepG2	0.0631145	1
TFDP1	HepG2	0.0604431	1
SP1	K562	0.0604127	1
E2F6	HeLa-S3	0.0596869	1
E2F4	HepG2	0.0596472	1
E2F2	HepG2	0.0539491	1
ELK4	HeLa-S3	0.05006	1
SP2	K562	0.0496023	1
IRF3	HepG2	0.0489176	1
NRF1	HepG2	0.0481953	1
SP2	HepG2	0.044985	1
MAZ	MCF-7	0.0442585	1
E2F1	HepG2	0.0425606	1
SP1	HepG2	0.0401957	1
FOXK2	MCF-7	0.0371937	1
ELK1	HeLa-S3	0.0344331	1
ELK1	HepG2	0.0335895	1
E2F4	HeLa-S3	0.030967	1
E2F4	K562	0.0285307	1
ELK4	HepG2	0.0250714	1
SP1	MCF-7	0.0130371	1
NRF1	HeLa-S3	0.0120386	1
E2F4	MCF-7	0.0117213	1
NRF1	MCF-7	0.0102422	1
ELK1	MCF-7	0.00917077	1

## Sheet: 0.1_0.9
TF_name	Cell_line	Enrichment Score	p_value
HNF1A	HepG2	10.4348	2.74705e-247
FOXA1	K562	7.29782	5.68818e-20
GATA1	K562	7.12611	5.06047e-123
GATA2	K562	6.63544	0
LEF1	K562	5.20211	1.54e-162
STAT3	HeLa-S3	5.18604	4.50706e-28
GATA2	HepG2	4.54759	4.82551e-66
HNF4G	HepG2	4.03451	3.73994e-179
HNF4A	HepG2	3.85868	1.99662266549185e-314
TCF7	HepG2	3.79598	7.67698e-90
TCF7L2	HepG2	3.75478	7.00477e-173
CEBPD	HepG2	3.54316	1.58023e-75
FOXA3	K562	3.51534	7.08144e-82
RUNX1	K562	3.50756	9.48348e-26
CEBPA	HepG2	3.43014	4.76169e-178
NR2F2	HepG2	3.17251	3.20055e-53
IRF9	K562	3.16442	1.52856e-26
MEF2D	K562	3.10189	7.63395e-65
THRB	HepG2	2.98861	4.79201e-42
FOXA1	HepG2	2.93862	1.14076e-192
NFIC	HepG2	2.90092	2.63612e-19
FOXA1	MCF-7	2.82764	1.87209e-56
MAFG	K562	2.81949	5.97425e-217
CEBPB	HeLa-S3	2.7191	1.82352e-40
ONECUT2	HepG2	2.66198	8.69997e-29
MAFF	K562	2.64346	9.57491e-105
NFE2L1	K562	2.46622	3.38081e-68
MEF2A	K562	2.45757	8.2627e-40
KLF10	K562	2.44482	0.00173534
FOXA2	HepG2	2.40158	1.05015e-142
CEBPG	HepG2	2.38913	1.40454e-52
SMAD3	K562	2.37424	5.58995e-05
BACH1	K562	2.36093	7.44501e-133
RXRB	HepG2	2.33612	6.19805e-65
FOXP1	HepG2	2.29175	9.20483e-59
SOX13	HepG2	2.28341	7.62331e-42
NFE2	K562	2.27009	1.15716e-156
GATA4	HepG2	2.26843	1.67081e-11
JUND	HeLa-S3	2.20986	3.39867e-108
PBX2	K562	2.20141	1.84198e-78
CEBPB	HepG2	2.16019	4.27612e-54
TEF	HepG2	2.13616	2.32222e-11
HMBOX1	K562	2.1229	1.35681e-27
NR2F2	K562	2.11289	1.35537e-45
JUNB	K562	2.10896	1.22849e-178
HNF1B	HepG2	2.09896	3.79223e-26
TCF7L2	K562	2.09894	9.38447e-06
NR4A1	K562	2.09871	2.83884e-29
GATA3	MCF-7	2.0932	4.24074e-13
MEF2A	HepG2	2.05103	1.75916e-12
JUND	K562	2.04901	3.64398e-293
RARA	HepG2	2.02629	6.02249e-70
FOXA3	HepG2	2.0123	7.14782e-59
SRF	K562	1.99567	4.66771e-37
NR5A1	HepG2	1.98002	2.09308e-62
DBP	HepG2	1.97649	0.110806
FOS	K562	1.95011	6.51329e-39
IRF1	HepG2	1.94893	6.97698e-09
FOSL2	MCF-7	1.92706	2.54288e-49
FOSL1	K562	1.90827	3.90657706166674e-320
NFIL3	HepG2	1.87832	6.60175e-34
MAFK	K562	1.85995	3.94771e-110
NFATC3	K562	1.83185	1.60458e-15
BCL6	K562	1.82239	0.000515133
ONECUT1	HepG2	1.82182	5.38113e-62
FOS	MCF-7	1.81026	4.26162e-79
PRDM1	HeLa-S3	1.77816	0.000128624
TCF7L2	MCF-7	1.75898	6.92851e-10
NR2F1	HepG2	1.72592	1.4744e-44
ATF4	K562	1.6871	4.19077e-67
HLF	HepG2	1.63119	3.19292e-58
IKZF1	K562	1.60735	4.84934e-106
TBX18	K562	1.54285	0.000217157
NR3C1	K562	1.54004	0.0368601
TEAD1	HepG2	1.52438	1.25389e-22
FOXK2	K562	1.52088	2.9845e-24
FOSL2	HepG2	1.51551	1.15939e-66
JUND	HepG2	1.50131	2.03306e-61
ESRRA	HepG2	1.48547	4.25225e-15
PBX2	HepG2	1.48237	0.0290128
ZNF652	HepG2	1.45706	3.25808e-09
CEBPG	K562	1.43839	1.8227e-19
FOXO4	K562	1.4117	0.282729
CEBPG	MCF-7	1.40748	0.000103459
MEF2D	HepG2	1.39933	4.79912e-06
CEBPB	K562	1.39235	6.26876e-27
JUN	HeLa-S3	1.38177	0.000162158
RELA	K562	1.37283	0.00131141
NFE2L1	HepG2	1.33068	0.0677183
ZNF24	K562	1.32524	6.89614e-42
IRF1	K562	1.29621	7.14575e-34
MAFG	HepG2	1.29512	0.00390223
MAFF	HepG2	1.29293	1.06512e-09
CUX1	K562	1.27054	0.0069734
CEBPB	MCF-7	1.26906	0.000616383
RBPJ	K562	1.25129	0.118954
MAFF	HeLa-S3	1.2512	0.00325228
NFIX	K562	1.24905	0.0973063
BCL6	HepG2	1.24777	5.90466e-07
NFIA	HepG2	1.23834	0.00266874
MEIS2	K562	1.23359	1.25393e-06
NR2F1	K562	1.2195	1.95751e-17
USF1	K562	1.20999	4.86959e-12
ZNF274	K562	1.19995	0.203364
FOS	HeLa-S3	1.19381	0.00110717
MITF	K562	1.16093	8.27441e-16
TEAD4	HepG2	1.15722	0.000369682
FOXK2	HepG2	1.15688	0.0546631
ISL2	HepG2	1.15661	0.147884
PITX1	HepG2	1.15474	0.0255967
GFI1	HepG2	1.15363	0.0067508
SPI1	K562	1.13644	3.21317e-11
TCF7	K562	1.11627	0.118962
JUND	MCF-7	1.10799	0.0279553
TEAD4	K562	1.10127	0.00931491
IRF2	K562	1.1001	0.0256883
ESRRA	K562	1.09967	0.00152231
TEAD4	MCF-7	1.09186	0.238719
ZBTB12	K562	1.07803	0.306657
ZNF384	K562	1.07761	2.49163e-15
ATF2	K562	1.07378	0.00149299
NR2C1	K562	1.07248	0.0328762
RREB1	K562	1.05649	0.0792087
FOXK1	HepG2	1.05315	0.195915
NFIB	HepG2	1.05159	0.271037
ZEB1	HepG2	1.03547	0.295027
USF2	K562	1.03384	0.0846467
SIX1	HepG2	1.03074	0.397993
PPARG	HepG2	1.01625	0.388314
NFE2	HepG2	1.01333	0.472529
TCF7L2	HeLa-S3	1.00708	0.486554
ATF3	K562	0.999199	0.518254
CUX1	MCF-7	0.966972	0.622206
SRF	MCF-7	0.950295	0.708341
MAFK	MCF-7	0.937438	0.801394
NFIC	K562	0.933265	0.955836
NFE2L2	HepG2	0.928056	0.875302
PKNOX1	K562	0.926413	0.999761
SRF	HepG2	0.920479	0.892312
NFE2L2	HeLa-S3	0.911356	0.825244
ZKSCAN1	K562	0.904837	0.93772
MAFK	HepG2	0.885368	0.999969
TFE3	K562	0.880322	0.997732
FOSL1	HepG2	0.87223	0.999618
ZNF384	HepG2	0.871642	1
ZNF460	HepG2	0.866644	1
HEY1	K562	0.866272	0.759352
SREBF2	K562	0.866272	0.778337
ZNF24	HepG2	0.865666	0.999496
ETV1	K562	0.846893	1
TFAP4	HepG2	0.840969	1
MXI1	K562	0.833304	0.977544
ZNF317	HepG2	0.814186	0.999911
HOXA5	HepG2	0.809168	0.89154
TBX2	HepG2	0.799089	0.999996
ATF2	HepG2	0.797124	1
TEAD1	K562	0.791846	0.999989
ZKSCAN1	HeLa-S3	0.788941	0.905712
JUN	K562	0.783757	1
MGA	K562	0.770322	1
ETS2	K562	0.77002	0.820144
ZBTB26	HepG2	0.763947	1
MAFK	HeLa-S3	0.762292	0.999996
DLX6	HepG2	0.759756	0.964371
ATF4	HepG2	0.755984	0.978612
RREB1	HepG2	0.747675	1
GABPA	K562	0.732971	1
ZKSCAN1	HepG2	0.732017	0.999917
NR2F2	MCF-7	0.730098	0.999998
TBX3	HepG2	0.727032	0.999777
ETV6	K562	0.721597	1
MEIS2	HepG2	0.716999	0.999986
MIXL1	HepG2	0.712556	0.999974
ESRRB	K562	0.712268	0.873938
HSF2	HepG2	0.683493	1
USF1	HepG2	0.679894	1
CLOCK	K562	0.673766	0.983486
ESR1	MCF-7	0.66194	1
USF2	HeLa-S3	0.660604	1
ZNF282	K562	0.657337	1
SREBF1	K562	0.643137	0.999816
JUN	HepG2	0.633348	1
MEIS1	HepG2	0.628727	0.999579
NFIB	MCF-7	0.625739	1
NKX3-1	HepG2	0.622225	0.954609
TP53	HepG2	0.619928	1
TCF3	K562	0.60764	1
MNT	K562	0.597269	1
ZSCAN29	K562	0.595633	1
SMAD3	HepG2	0.588388	0.999997
ATF7	HepG2	0.586966	1
TFCP2	K562	0.583926	0.999991
ZKSCAN5	HepG2	0.582069	1
TEAD2	K562	0.57833	1
ELF1	K562	0.567784	1
ZKSCAN1	MCF-7	0.566161	0.997674
RFX1	K562	0.550131	1
CREB1	HepG2	0.549659	1
ELF3	HepG2	0.545904	1
BHLHE40	K562	0.545868	1
ETV4	HepG2	0.543915	1
IRF2	HepG2	0.541818	1
MTF1	HepG2	0.521671	0.999995
ATF7	K562	0.519321	1
MAX	K562	0.516754	1
CREB3	K562	0.515626	1
MXI1	HepG2	0.492855	1
KLF6	K562	0.49051	1
MAX	HepG2	0.47801	1
CREB1	K562	0.476674	1
IRF5	HepG2	0.46719	1
ESRRA	MCF-7	0.466277	1
SMAD5	K562	0.463045	1
RFX7	K562	0.462011	0.985143
NR2C2	K562	0.453209	1
USF2	HepG2	0.453176	1
NEUROD1	K562	0.451843	1
SREBF1	MCF-7	0.437225	1
MYBL2	K562	0.433131	1
E2F7	K562	0.43016	1
NR2C2	HepG2	0.422064	1
RELA	HepG2	0.420291	1
MNT	HepG2	0.416756	1
REST	HeLa-S3	0.405942	1
NFATC3	HepG2	0.40454	0.999999
ZSCAN29	HepG2	0.399246	1
RBPJ	HepG2	0.392248	1
PKNOX1	MCF-7	0.385806	1
MLX	K562	0.385006	1
SNAI1	HepG2	0.384531	1
ZBTB7B	HepG2	0.381286	1
GABPA	HepG2	0.38044	1
ZNF274	HepG2	0.377249	1
CREB3L1	K562	0.37581	1
MYBL2	HepG2	0.372134	1
TGIF2	HepG2	0.36662	1
MYC	K562	0.361435	1
HES1	K562	0.359325	1
RFX1	MCF-7	0.358534	1
NRL	HepG2	0.358531	1
MNX1	HepG2	0.354383	1
ELF4	K562	0.350002	1
BHLHE40	HepG2	0.349489	1
ZNF24	MCF-7	0.348743	1
REST	HepG2	0.343165	1
NFYB	K562	0.340372	1
CREB1	MCF-7	0.329133	1
ZNF263	K562	0.320791	1
ZNF263	HepG2	0.319732	1
ERF	K562	0.31875	1
ATF3	HepG2	0.315397	1
ELF1	HepG2	0.31504	1
CREM	K562	0.308213	1
ATF7	MCF-7	0.307252	1
CLOCK	MCF-7	0.304674	1
ZNF143	K562	0.301222	1
MXI1	HeLa-S3	0.300823	1
SOX18	HepG2	0.298387	1
RFX5	HeLa-S3	0.292193	1
HSF1	MCF-7	0.290405	1
E2F8	K562	0.290391	1
ZNF740	K562	0.283794	1
MAX	HeLa-S3	0.280304	1
VEZF1	K562	0.277219	1
NFYA	K562	0.276207	1
KLF16	K562	0.269715	1
ISX	HepG2	0.264924	1
TFE3	HepG2	0.259738	1
YY1	K562	0.258753	1
MYC	HepG2	0.258585	1
REST	K562	0.258254	1
MYC	HeLa-S3	0.247369	1
ZNF148	K562	0.246928	1
NR2C2	HeLa-S3	0.246832	1
EGR1	K562	0.239965	1
CTCF	MCF-7	0.238983	1
ATF6	HepG2	0.238906	1
KLF13	K562	0.238584	1
ETV5	K562	0.232829	1
TEAD2	HepG2	0.22609	1
ZBED1	K562	0.223496	1
MLX	HepG2	0.219924	1
CTCF	HepG2	0.213597	1
THAP11	HepG2	0.211025	1
RFX1	HepG2	0.208515	1
JUN	MCF-7	0.208271	1
CTCF	HeLa-S3	0.206799	1
REST	MCF-7	0.2058	1
NFKB2	HepG2	0.204736	1
ZBTB7B	MCF-7	0.204169	1
ZNF143	HepG2	0.202038	1
ZNF740	HepG2	0.201041	1
PRDM4	HepG2	0.200086	1
ELK3	K562	0.192505	0.999851
MNT	MCF-7	0.189525	1
ZBTB7A	HepG2	0.188866	1
CTCF	K562	0.187073	1
ZBTB7A	K562	0.186017	1
RFX3	HepG2	0.183602	1
E2F1	HeLa-S3	0.181097	1
ZBTB33	K562	0.180551	1
SREBF2	HeLa-S3	0.173668	0.999993
CREM	HepG2	0.17319	1
ATF6	K562	0.172585	1
TCF3	HepG2	0.170963	1
NFYA	HeLa-S3	0.169338	1
XBP1	HepG2	0.168925	1
MAZ	K562	0.16862	1
NFYC	HepG2	0.167288	1
HINFP	K562	0.165044	1
TFDP1	K562	0.16166	1
KLF4	MCF-7	0.160442	1
E2F6	K562	0.159829	1
SPDEF	MCF-7	0.146633	1
ELF1	MCF-7	0.146603	1
GABPA	HeLa-S3	0.146155	1
KLF13	HepG2	0.144905	1
MSX2	MCF-7	0.144876	1
E2F1	K562	0.143323	1
ETV5	HepG2	0.142442	1
EGR1	HepG2	0.142161	1
NFYB	HeLa-S3	0.141176	1
KLF16	HepG2	0.140785	1
OVOL1	MCF-7	0.135093	1
TCFL5	K562	0.128336	1
KLF9	HepG2	0.127493	1
RFX5	MCF-7	0.126279	1
ELF2	K562	0.124481	1
ERF	HepG2	0.124207	1
RFX5	K562	0.118212	1
NFYA	HepG2	0.117532	1
HES1	MCF-7	0.115794	1
NRF1	K562	0.11557	1
MYC	MCF-7	0.114472	1
MAZ	HepG2	0.113041	1
ETS1	K562	0.112219	1
ZBTB33	MCF-7	0.11052	1
MAX	MCF-7	0.109203	1
CREB3	HepG2	0.108559	1
E2F1	MCF-7	0.108336	1
KLF6	HepG2	0.106193	1
KLF11	HepG2	0.102688	1
RFX5	HepG2	0.102091	1
HINFP	HepG2	0.101893	1
GABPA	MCF-7	0.0983198	1
NR3C1	HepG2	0.0976036	1
E2F8	MCF-7	0.0970661	1
MAZ	HeLa-S3	0.0956271	1
NFYB	HepG2	0.0943528	1
CTCFL	K562	0.0907174	1
EGR1	MCF-7	0.0874372	1
THAP1	K562	0.0866847	1
ZNF143	HeLa-S3	0.0814253	1
ZBTB33	HepG2	0.0802237	1
KLF9	MCF-7	0.0738014	1
ETV6	HepG2	0.0732653	1
ETS1	HepG2	0.0716056	1
YY1	HepG2	0.068335	1
LBX2	HepG2	0.0677802	1
GMEB2	HepG2	0.0650689	1
ELF4	HepG2	0.0638691	1
ELK1	K562	0.0634624	1
ZBTB14	HepG2	0.0631002	1
E2F4	HepG2	0.0604801	1
TFDP1	HepG2	0.0602998	1
E2F6	HeLa-S3	0.0602817	1
SP1	K562	0.0602129	1
E2F2	HepG2	0.0538212	1
ELK4	HeLa-S3	0.0500364	1
SP2	K562	0.0494382	1
IRF3	HepG2	0.0488017	1
NRF1	HepG2	0.0481644	1
SP2	HepG2	0.0448784	1
MAZ	MCF-7	0.0444372	1
E2F1	HepG2	0.0424597	1
SP1	HepG2	0.0401004	1
FOXK2	MCF-7	0.0371025	1
ELK1	HeLa-S3	0.0343403	1
ELK1	HepG2	0.0340428	1
E2F4	HeLa-S3	0.0308836	1
E2F4	K562	0.0284363	1
ELK4	HepG2	0.025012	1
SP1	MCF-7	0.0130051	1
NRF1	HeLa-S3	0.0120061	1
E2F4	MCF-7	0.0116925	1
NRF1	MCF-7	0.0102335	1
ELK1	MCF-7	0.00922782	1

## Sheet: 0.2_0.9
TF_name	Cell_line	Enrichment Score	p_value
HNF1A	HepG2	10.4447	1.2707e-247
FOXA1	K562	7.24707	8.52867e-20
GATA1	K562	7.1097	1.07225e-122
GATA2	K562	6.61997	0
STAT3	HeLa-S3	5.22191	2.24915e-28
LEF1	K562	5.18236	1.19909e-161
GATA2	HepG2	4.57225	1.16845e-66
HNF4G	HepG2	4.03775	1.95123e-179
HNF4A	HepG2	3.86316	3.78943526797336e-315
TCF7	HepG2	3.80448	3.14962e-90
TCF7L2	HepG2	3.75636	4.88415e-173
CEBPD	HepG2	3.54482	1.32421e-75
FOXA3	K562	3.49089	8.08857e-81
RUNX1	K562	3.48317	1.97427e-25
CEBPA	HepG2	3.4266	1.06769e-177
NR2F2	HepG2	3.17877	1.91731e-53
IRF9	K562	3.14241	3.43633e-26
MEF2D	K562	3.08031	6.13895e-64
THRB	HepG2	2.98787	4.99332e-42
FOXA1	HepG2	2.93824	1.23375e-192
NFIC	HepG2	2.89181	3.50836e-19
FOXA1	MCF-7	2.82455	2.56924e-56
KLF10	K562	2.81016	0.000216937
MAFG	K562	2.8073	5.94311e-215
CEBPB	HeLa-S3	2.72064	1.61315e-40
ONECUT2	HepG2	2.66035	9.4793e-29
MAFF	K562	2.62508	4.54609e-103
MEF2A	K562	2.46184	5.11444e-40
NFE2L1	K562	2.44907	4.787e-67
FOXA2	HepG2	2.4025	7.27076e-143
CEBPG	HepG2	2.38874	1.4604e-52
SMAD3	K562	2.35773	6.48441e-05
BACH1	K562	2.35117	1.71922e-131
RXRB	HepG2	2.33763	4.70752e-65
FOXP1	HepG2	2.29403	6.30308e-59
SOX13	HepG2	2.28092	9.99839e-42
GATA4	HepG2	2.2716	1.52266e-11
NFE2	K562	2.2585	1.47612e-154
JUND	HeLa-S3	2.21016	3.06972e-108
PBX2	K562	2.18609	5.73023e-77
CEBPB	HepG2	2.15784	6.23184e-54
HMBOX1	K562	2.13308	5.35411e-28
TEF	HepG2	2.12945	2.86423e-11
NR2F2	K562	2.11629	7.49079e-46
JUNB	K562	2.09784	6.25874e-176
NR4A1	K562	2.09448	3.97863e-29
GATA3	MCF-7	2.09343	4.20173e-13
HNF1B	HepG2	2.09237	6.47431e-26
TCF7L2	K562	2.08435	1.15065e-05
MEF2A	HepG2	2.06418	1.05522e-12
JUND	K562	2.03869	9.31399e-289
RARA	HepG2	2.03538	6.15382e-71
FOXA3	HepG2	2.01395	4.97215e-59
SRF	K562	1.98179	2.76331e-36
NR5A1	HepG2	1.98081	1.7114e-62
DBP	HepG2	1.97028	0.112318
FOS	K562	1.95303	3.89074e-39
IRF1	HepG2	1.94282	8.3202e-09
FOSL2	MCF-7	1.92714	2.49808e-49
BCL6	K562	1.90531	0.000178949
FOSL1	K562	1.89711	5.79583730532326e-314
NFIL3	HepG2	1.87431	1.14217e-33
MAFK	K562	1.85146	1.89706e-108
NFATC3	K562	1.8298	1.7761e-15
ONECUT1	HepG2	1.82168	5.50994e-62
FOS	MCF-7	1.80944	5.72649e-79
PRDM1	HeLa-S3	1.78127	0.000122402
TCF7L2	MCF-7	1.75578	7.92852e-10
NR2F1	HepG2	1.72895	7.26953e-45
ATF4	K562	1.68006	5.05852e-66
HLF	HepG2	1.63038	4.18088e-58
IKZF1	K562	1.60664	6.19292e-106
TBX18	K562	1.56259	0.000138918
NR3C1	K562	1.52934	0.0395995
PBX2	HepG2	1.52637	0.0197809
TEAD1	HepG2	1.52323	1.49899e-22
FOSL2	HepG2	1.51414	2.28236e-66
FOXK2	K562	1.51095	1.59951e-23
JUND	HepG2	1.499	6.06718e-61
ESRRA	HepG2	1.49073	2.34217e-15
ZNF652	HepG2	1.47186	1.17549e-09
RELA	K562	1.45404	0.000152956
CEBPG	K562	1.44721	3.97854e-20
CEBPG	MCF-7	1.40601	0.000108569
FOXO4	K562	1.40189	0.288779
MEF2D	HepG2	1.39877	4.91968e-06
CEBPB	K562	1.39681	1.78764e-27
RBPJ	K562	1.38596	0.0352733
JUN	HeLa-S3	1.38396	0.000150722
ZNF24	K562	1.35795	1.36018e-49
NFE2L1	HepG2	1.3265	0.0701819
MAFG	HepG2	1.29748	0.00367354
MAFF	HepG2	1.29443	8.91559e-10
IRF1	K562	1.28719	3.98677e-32
CEBPB	MCF-7	1.26926	0.000611454
CUX1	K562	1.26171	0.00858301
MAFF	HeLa-S3	1.25345	0.00303107
BCL6	HepG2	1.24611	6.87191e-07
NFIX	K562	1.24036	0.105281
NFIA	HepG2	1.23701	0.00279117
MEIS2	K562	1.23596	9.91993e-07
NR2F1	K562	1.22023	1.50322e-17
USF1	K562	1.20682	9.30623e-12
FOS	HeLa-S3	1.19481	0.00105234
ZNF274	K562	1.19161	0.21404
FOXK2	HepG2	1.1608	0.0504181
TEAD4	HepG2	1.16051	0.000287892
MITF	K562	1.15689	3.69815e-15
PITX1	HepG2	1.15467	0.0256452
ISL2	HepG2	1.15298	0.153731
GFI1	HepG2	1.15159	0.00737132
SPI1	K562	1.13478	5.23723e-11
TCF7	K562	1.1085	0.135484
JUND	MCF-7	1.10832	0.0275865
ESRRA	K562	1.10013	0.00145074
TEAD4	K562	1.09964	0.0102552
TEAD4	MCF-7	1.09261	0.236771
IRF2	K562	1.09245	0.0357648
NR2C1	K562	1.07617	0.0265548
ZNF384	K562	1.07564	1.1144e-14
ZBTB12	K562	1.07053	0.326151
ATF2	K562	1.06978	0.00245985
FOXK1	HepG2	1.05808	0.174142
RREB1	K562	1.05371	0.089839
NFIB	HepG2	1.04829	0.284967
ZEB1	HepG2	1.0358	0.293154
USF2	K562	1.02907	0.118791
SIX1	HepG2	1.0275	0.410939
PPARG	HepG2	1.01535	0.394988
TCF7L2	HeLa-S3	1.01484	0.448638
NFE2	HepG2	1.01474	0.466934
ATF3	K562	0.995021	0.577351
CUX1	MCF-7	0.964561	0.62782
SRF	MCF-7	0.949662	0.710467
MAFK	MCF-7	0.935843	0.807109
NFE2L2	HepG2	0.933355	0.857326
NFIC	K562	0.932056	0.95875
PKNOX1	K562	0.924099	0.999845
SRF	HepG2	0.917589	0.900369
NFE2L2	HeLa-S3	0.909309	0.83051
ZKSCAN1	K562	0.904756	0.937986
MAFK	HepG2	0.886319	0.999965
TFE3	K562	0.878595	0.998025
ZNF384	HepG2	0.872947	1
FOSL1	HepG2	0.871272	0.999653
ZNF460	HepG2	0.869661	1
ZNF24	HepG2	0.862948	0.999608
HEY1	K562	0.860248	0.767418
SREBF2	K562	0.860248	0.787195
ETV1	K562	0.845207	1
TFAP4	HepG2	0.844015	1
MXI1	K562	0.827509	0.981173
ZNF317	HepG2	0.815739	0.999898
HOXA5	HepG2	0.806628	0.894497
TBX2	HepG2	0.805367	0.999992
ATF2	HepG2	0.799507	1
TEAD1	K562	0.797187	0.999981
ZKSCAN1	HeLa-S3	0.790556	0.904049
JUN	K562	0.778306	1
MGA	K562	0.767252	1
ETS2	K562	0.764665	0.82483
MAFK	HeLa-S3	0.763674	0.999996
ZBTB26	HepG2	0.763512	1
DLX6	HepG2	0.757372	0.965814
ATF4	HepG2	0.753611	0.97966
RREB1	HepG2	0.746897	1
GABPA	K562	0.735299	1
ZKSCAN1	HepG2	0.732963	0.999912
NR2F2	MCF-7	0.731838	0.999997
TBX3	HepG2	0.731142	0.999723
ETV6	K562	0.721552	1
MEIS2	HepG2	0.716619	0.999987
MIXL1	HepG2	0.710319	0.999977
ESRRB	K562	0.707315	0.87774
HSF2	HepG2	0.686065	1
USF1	HepG2	0.679859	1
CLOCK	K562	0.66908	0.984846
ESR1	MCF-7	0.665987	1
USF2	HeLa-S3	0.661253	1
ZNF282	K562	0.652766	1
NKX3-1	HepG2	0.644597	0.943828
SREBF1	K562	0.638664	0.99985
JUN	HepG2	0.634852	1
NFIB	MCF-7	0.627267	1
MEIS1	HepG2	0.626754	0.99961
TP53	HepG2	0.621939	1
TCF3	K562	0.607384	1
SMAD3	HepG2	0.596493	0.999995
MNT	K562	0.594003	1
ZSCAN29	K562	0.591491	1
ATF7	HepG2	0.588566	1
ZKSCAN5	HepG2	0.58529	1
TEAD2	K562	0.58437	1
TFCP2	K562	0.579866	0.999993
ELF1	K562	0.565969	1
ZKSCAN1	MCF-7	0.564749	0.997752
CREB1	HepG2	0.54989	1
RFX1	K562	0.548422	1
ELF3	HepG2	0.54713	1
BHLHE40	K562	0.546512	1
ETV4	HepG2	0.545231	1
IRF2	HepG2	0.540117	1
MTF1	HepG2	0.520034	0.999996
ATF7	K562	0.518237	1
MAX	K562	0.513804	1
CREB3	K562	0.51204	1
MXI1	HepG2	0.491307	1
SMAD5	K562	0.490825	1
KLF6	K562	0.489498	1
MAX	HepG2	0.481165	1
CREB1	K562	0.475756	1
ESRRA	MCF-7	0.467257	1
IRF5	HepG2	0.465724	1
RFX7	K562	0.458799	0.985754
NR2C2	K562	0.454348	1
USF2	HepG2	0.452911	1
NEUROD1	K562	0.448701	1
SREBF1	MCF-7	0.439425	1
MLX	K562	0.436948	1
RELA	HepG2	0.432654	1
MYBL2	K562	0.430119	1
E2F7	K562	0.427169	1
NR2C2	HepG2	0.42296	1
MNT	HepG2	0.418261	1
NFATC3	HepG2	0.414792	0.999999
REST	HeLa-S3	0.406351	1
ZSCAN29	HepG2	0.40025	1
RBPJ	HepG2	0.39233	1
SNAI1	HepG2	0.390242	1
PKNOX1	MCF-7	0.386489	1
ZBTB7B	HepG2	0.383267	1
GABPA	HepG2	0.381204	1
ZNF274	HepG2	0.380528	1
CREB3L1	K562	0.373196	1
MYBL2	HepG2	0.370966	1
TGIF2	HepG2	0.366658	1
MYC	K562	0.3615	1
NRL	HepG2	0.361377	1
RFX1	MCF-7	0.358706	1
HES1	K562	0.356826	1
MNX1	HepG2	0.353271	1
BHLHE40	HepG2	0.349792	1
ZNF24	MCF-7	0.348633	1
ELF4	K562	0.348542	1
REST	HepG2	0.346085	1
NFYB	K562	0.339342	1
CREB1	MCF-7	0.329347	1
ERF	K562	0.327705	1
ZNF263	HepG2	0.320753	1
ZNF263	K562	0.319887	1
ELF1	HepG2	0.315252	1
ATF3	HepG2	0.314407	1
CREM	K562	0.309645	1
ATF7	MCF-7	0.30728	1
CLOCK	MCF-7	0.303914	1
MXI1	HeLa-S3	0.302509	1
ZNF143	K562	0.299127	1
SOX18	HepG2	0.29745	1
RFX5	HeLa-S3	0.29462	1
HSF1	MCF-7	0.289681	1
E2F8	K562	0.288372	1
ZNF740	K562	0.284463	1
MAX	HeLa-S3	0.284278	1
VEZF1	K562	0.279162	1
NFYA	K562	0.274286	1
KLF16	K562	0.272081	1
ISX	HepG2	0.264092	1
MYC	HepG2	0.260109	1
REST	K562	0.259666	1
TFE3	HepG2	0.259457	1
YY1	K562	0.256953	1
ZNF148	K562	0.249291	1
MYC	HeLa-S3	0.24872	1
NR2C2	HeLa-S3	0.247123	1
EGR1	K562	0.240415	1
KLF13	K562	0.239852	1
CTCF	MCF-7	0.239108	1
ATF6	HepG2	0.238156	1
TEAD2	HepG2	0.23277	1
ETV5	K562	0.232297	1
ZBED1	K562	0.221942	1
MLX	HepG2	0.219936	1
CTCF	HepG2	0.213827	1
THAP11	HepG2	0.211429	1
RFX1	HepG2	0.208509	1
JUN	MCF-7	0.208384	1
CTCF	HeLa-S3	0.207104	1
REST	MCF-7	0.205287	1
ZBTB7B	MCF-7	0.204769	1
NFKB2	HepG2	0.204093	1
ZNF143	HepG2	0.203482	1
ZNF740	HepG2	0.201878	1
PRDM4	HepG2	0.199458	1
ELK3	K562	0.191166	0.999859
MNT	MCF-7	0.190118	1
ZBTB7A	HepG2	0.189366	1
ATF6	K562	0.188524	1
SREBF2	HeLa-S3	0.187257	0.999987
CTCF	K562	0.186823	1
ZBTB7A	K562	0.186175	1
RFX3	HepG2	0.183025	1
E2F1	HeLa-S3	0.181395	1
ZBTB33	K562	0.179295	1
TCF3	HepG2	0.175601	1
CREM	HepG2	0.173575	1
NFYA	HeLa-S3	0.169773	1
MAZ	K562	0.16909	1
XBP1	HepG2	0.168395	1
NFYC	HepG2	0.168217	1
HINFP	K562	0.167845	1
TFDP1	K562	0.161968	1
KLF4	MCF-7	0.161129	1
E2F6	K562	0.161106	1
SPDEF	MCF-7	0.147595	1
GABPA	HeLa-S3	0.147115	1
ELF1	MCF-7	0.146963	1
MSX2	MCF-7	0.146571	1
E2F1	K562	0.144823	1
KLF13	HepG2	0.14445	1
ETV5	HepG2	0.143322	1
EGR1	HepG2	0.142965	1
NFYB	HeLa-S3	0.141383	1
KLF16	HepG2	0.140759	1
OVOL1	MCF-7	0.134757	1
KLF9	HepG2	0.127625	1
TCFL5	K562	0.127443	1
RFX5	MCF-7	0.126058	1
ERF	HepG2	0.124285	1
ELF2	K562	0.123616	1
NFYA	HepG2	0.117763	1
RFX5	K562	0.11739	1
NRF1	K562	0.116739	1
HES1	MCF-7	0.115505	1
MYC	MCF-7	0.114586	1
MAZ	HepG2	0.113366	1
ETS1	K562	0.113282	1
ZBTB33	MCF-7	0.112986	1
MAX	MCF-7	0.109334	1
E2F1	MCF-7	0.108468	1
CREB3	HepG2	0.108218	1
KLF6	HepG2	0.106433	1
KLF11	HepG2	0.103255	1
RFX5	HepG2	0.10177	1
HINFP	HepG2	0.101573	1
GABPA	MCF-7	0.0988581	1
MAZ	HeLa-S3	0.0987516	1
NR3C1	HepG2	0.0972972	1
E2F8	MCF-7	0.096824	1
NFYB	HepG2	0.0951473	1
THAP1	K562	0.0911456	1
CTCFL	K562	0.0900865	1
EGR1	MCF-7	0.0876199	1
ZNF143	HeLa-S3	0.0814973	1
ZBTB33	HepG2	0.0799719	1
KLF9	MCF-7	0.0741273	1
ETV6	HepG2	0.0730353	1
ETS1	HepG2	0.0713808	1
YY1	HepG2	0.0686002	1
LBX2	HepG2	0.0675674	1
GMEB2	HepG2	0.0648647	1
ELF4	HepG2	0.0636686	1
ZBTB14	HepG2	0.0634417	1
ELK1	K562	0.0630211	1
E2F4	HepG2	0.0612615	1
TFDP1	HepG2	0.0611531	1
E2F6	HeLa-S3	0.0611039	1
SP1	K562	0.0609571	1
E2F2	HepG2	0.0536523	1
ELK4	HeLa-S3	0.050845	1
SP2	K562	0.0490944	1
IRF3	HepG2	0.0486485	1
NRF1	HepG2	0.0480962	1
SP2	HepG2	0.0449582	1
MAZ	MCF-7	0.044576	1
E2F1	HepG2	0.0423264	1
SP1	HepG2	0.0401867	1
FOXK2	MCF-7	0.03701	1
ELK1	HepG2	0.0344671	1
ELK1	HeLa-S3	0.0343824	1
E2F4	HeLa-S3	0.0307604	1
E2F4	K562	0.0282386	1
ELK4	HepG2	0.0249335	1
SP1	MCF-7	0.0129727	1
NRF1	HeLa-S3	0.0119583	1
E2F4	MCF-7	0.0116634	1
NRF1	MCF-7	0.0102549	1
ELK1	MCF-7	0.00920481	1
