# Supplementary material for: Detection of new pioneer transcription factors as cell-type-specific nucleosome binders
Source: eLife. 2024 Jan 31;12:RP88936. doi: 10.7554/eLife.88936 (PMC10945518; doi:10.7554/eLife.88936)
Supplement: Figure 2—source data 1. [file elife-88936-fig2-data1.xlsx]

## Sheet: Figure 2a_Enrichment score
TF_name	cell_line	Enrichment score	p_value
ZNF274	HeLa-S3	5.4033	4.65012e-12
ZNF274	K562	1.34756	7.00145e-07
IKZF1	HepG2	0.972452	0.608175
ATF2	HepG2	0.645909	1
ATF7	HepG2	0.58907	1
CEBPG	K562	0.516561	1
MAFF	HepG2	0.494471	1
CEBPB	K562	0.474904	1
ATF4	K562	0.460413	1
ATF2	K562	0.433553	1
MAFF	K562	0.407344	1
CUX1	MCF-7	0.377905	1
ATF7	MCF-7	0.373514	1
MAFK	HepG2	0.373103	1
CEBPG	MCF-7	0.365511	1
ZKSCAN1	HeLa-S3	0.363925	1
MAFG	K562	0.355733	1
MAFF	HeLa-S3	0.354208	1
HLF	HepG2	0.313731	1
NFIX	K562	0.312013	1
SRF	H1	0.304279	1
ZNF382	HepG2	0.29985	1
PBX2	K562	0.26796	1
TFE3	K562	0.263635	1
REST	HeLa-S3	0.262062	1
CREB1	HepG2	0.259344	1
CEBPB	HepG2	0.258225	1
ZNF24	K562	0.256272	1
MNT	HepG2	0.254789	1
ZKSCAN1	HepG2	0.253347	1
CEBPB	HeLa-S3	0.251091	1
CREB1	MCF-7	0.250282	1
ZKSCAN1	K562	0.247064	1
MAFK	HeLa-S3	0.245126	1
MAFK	MCF-7	0.243064	1
CEBPB	MCF-7	0.241595	1
MITF	K562	0.241491	1
HMBOX1	K562	0.235984	1
CUX1	K562	0.23332	1
SREBF1	MCF-7	0.226121	1
IRF3	HeLa-S3	0.22362	1
NFIB	MCF-7	0.220494	1
ATF3	K562	0.217776	1
NFE2L2	HepG2	0.214495	1
FOXA1	MCF-7	0.210233	1
FOXA3	K562	0.202887	1
ZKSCAN1	MCF-7	0.202354	1
FOS	MCF-7	0.202297	1
GATA3	MCF-7	0.201325	1
RFX1	MCF-7	0.199931	1
SRF	K562	0.19852	1
CEBPB	H1	0.194755	1
FOXO4	K562	0.193748	1
IRF1	K562	0.193184	1
ONECUT1	HepG2	0.19307	1
USF2	HeLa-S3	0.186676	1
ESR1	MCF-7	0.186616	1
TCF7L2	HeLa-S3	0.185436	1
RFX1	K562	0.183792	1
IRF9	K562	0.179529	1
MEF2D	K562	0.179388	1
USF1	H1	0.179021	1
JUN	HepG2	0.178254	1
NFE2	K562	0.17733	1
RFX5	HeLa-S3	0.176763	1
JUND	HepG2	0.169947	1
TCF7L2	MCF-7	0.16682	1
FOXA1	K562	0.164973	1
RBPJ	K562	0.164723	1
ZNF282	HepG2	0.162352	1
MAFK	H1	0.160263	1
BCL6	K562	0.158655	1
JUN	HeLa-S3	0.156827	1
ZNF24	HepG2	0.154678	1
IRF2	K562	0.154672	1
USF1	HepG2	0.154499	1
MAFK	K562	0.154397	1
FOXA2	HepG2	0.152282	1
SRF	MCF-7	0.150394	1
JUND	HeLa-S3	0.15011	1
NR2C2	HeLa-S3	0.148943	1
NEUROD1	MCF-7	0.148536	1
SREBF2	HeLa-S3	0.147745	1
NR2F2	MCF-7	0.147642	1
MEF2A	K562	0.147349	1
FOS	HeLa-S3	0.146353	1
NFATC3	K562	0.144855	1
FOSL1	K562	0.142533	1
NFYB	HeLa-S3	0.141675	1
ESRRB	K562	0.141612	1
SPI1	K562	0.141006	1
ISX	HepG2	0.140495	1
ZNF274	HepG2	0.139395	1
SRF	HepG2	0.137948	1
STAT3	HeLa-S3	0.137918	1
ZNF652	HepG2	0.13679	1
MAFG	HepG2	0.135335	1
ZBTB33	MCF-7	0.135306	1
REST	H1	0.135258	1
ZNF460	HepG2	0.133988	1
PKNOX1	K562	0.133785	1
PKNOX1	MCF-7	0.133541	1
CTCF	HeLa-S3	0.133041	1
NFIC	K562	0.132385	1
NFE2L1	K562	0.131755	1
NFE2L2	HeLa-S3	0.131256	1
LEF1	K562	0.131198	1
PRDM1	HeLa-S3	0.13059	1
IKZF1	K562	0.128665	1
MEIS2	K562	0.12799	1
GATA1	K562	0.127668	1
ESRRA	MCF-7	0.127572	1
ZNF24	MCF-7	0.127376	1
CEBPG	HepG2	0.125989	1
TEAD4	MCF-7	0.124164	1
USF2	K562	0.122961	1
CEBPA	HepG2	0.122353	1
FOSL2	MCF-7	0.121616	1
ESRRA	K562	0.119279	1
REST	HepG2	0.118947	1
MSX2	MCF-7	0.118511	1
NR2F1	K562	0.118354	1
USF2	HepG2	0.117104	1
TEAD1	K562	0.117077	1
NR4A1	K562	0.117023	1
MXI1	HeLa-S3	0.116595	1
NR3C1	K562	0.116494	1
RELA	K562	0.115842	1
MAX	HeLa-S3	0.115318	1
NFYA	HeLa-S3	0.115315	1
BACH1	H1	0.115207	1
FOXA1	HepG2	0.114862	1
NFE2	HepG2	0.114657	1
ZNF384	K562	0.114548	1
TEAD2	K562	0.114281	1
ELK3	K562	0.114135	1
FOSL2	HepG2	0.113895	1
ZNF317	HepG2	0.111257	1
NFIB	HepG2	0.110894	1
REST	MCF-7	0.110806	1
FOXK2	K562	0.109922	1
TFAP4	HepG2	0.109759	1
JUND	K562	0.10782	1
BCL6	HepG2	0.10757	1
TEAD4	K562	0.107174	1
NFIA	HepG2	0.106421	1
HSF2	HepG2	0.10569	1
JUND	MCF-7	0.105627	1
TP53	HepG2	0.105469	1
HNF4A	HepG2	0.1046	1
RFX7	K562	0.104437	1
GATA2	K562	0.10415	1
RORA	HepG2	0.10299	1
RARA	HepG2	0.102887	1
JUNB	K562	0.102779	1
NR5A1	HepG2	0.10227	1
TEAD4	H1	0.101617	1
BACH1	K562	0.101155	1
GABPA	HeLa-S3	0.100503	1
ATF7	K562	0.100382	1
MYC	HeLa-S3	0.100377	1
RUNX1	K562	0.100173	1
NR3C1	HepG2	0.0997718	1
ZKSCAN5	HepG2	0.099725	1
ONECUT2	HepG2	0.0994056	1
OVOL1	MCF-7	0.0984047	1
RFX1	HepG2	0.0981745	1
NR2F2	K562	0.098029	1
NFIL3	HepG2	0.0962203	1
MGA	K562	0.096218	1
TBX18	K562	0.0959047	1
KLF10	K562	0.0957796	1
USF1	K562	0.0956453	1
CTCF	MCF-7	0.0955777	1
CLOCK	MCF-7	0.0933289	1
ESRRA	HepG2	0.0914253	1
ZEB1	HepG2	0.0912746	1
NR2C1	K562	0.0910391	1
SMAD3	HepG2	0.0907537	1
E2F4	HeLa-S3	0.0905674	1
MEF2D	HepG2	0.0893294	1
ZSCAN29	K562	0.089121	1
JUN	K562	0.0888796	1
JUN	MCF-7	0.0886999	1
NR2F1	HepG2	0.0879755	1
PBX2	HepG2	0.0876205	1
TBX2	HepG2	0.0869812	1
MNT	MCF-7	0.0849533	1
MAX	HepG2	0.0846858	1
MYBL2	K562	0.0844641	1
JUND	H1	0.0843483	1
TFCP2	K562	0.0842955	1
PPARG	HepG2	0.0838165	1
GFI1	HepG2	0.0837396	1
MNX1	HepG2	0.0835687	1
NR2F2	HepG2	0.083008	1
GATA2	HepG2	0.0828954	1
BHLHE40	K562	0.082187	1
HNF4G	HepG2	0.0818297	1
NRL	HepG2	0.0812274	1
ZBTB26	HepG2	0.0811985	1
E2F1	HeLa-S3	0.0808985	1
FOXP1	HepG2	0.0808175	1
E2F3	K562	0.0807258	1
SMAD3	K562	0.0806631	1
ZNF384	HepG2	0.0804905	1
THRB	HepG2	0.0800089	1
SOX13	HepG2	0.0794697	1
SREBF2	K562	0.0794511	1
FOXA3	HepG2	0.0792539	1
USF2	H1	0.0791129	1
SMAD5	K562	0.0783842	1
MIXL1	HepG2	0.0782859	1
ETV1	K562	0.0780427	1
MAX	K562	0.0776116	1
RREB1	HepG2	0.077607	1
ZBTB12	K562	0.0772447	1
BHLHE40	HepG2	0.0770441	1
RFX5	MCF-7	0.0770291	1
ZNF263	HepG2	0.076918	1
TCF7	HepG2	0.0767303	1
TCF7L2	HepG2	0.0764894	1
IRF5	HepG2	0.0764352	1
TCF7	K562	0.0762571	1
TCFL5	K562	0.0759022	1
MEF2A	HepG2	0.0757403	1
TEAD4	HepG2	0.0757169	1
RXRB	HepG2	0.0752805	1
NFIC	HepG2	0.0752735	1
IRF1	HepG2	0.0747431	1
CEBPD	HepG2	0.0738953	1
PITX1	HepG2	0.0735753	1
GABPA	K562	0.0733333	1
CTCF	HepG2	0.0732221	1
ZNF143	HeLa-S3	0.0731652	1
NFATC3	HepG2	0.071755	1
ZBTB7B	HepG2	0.0705578	1
ISL2	HepG2	0.0704793	1
CTCF	H1	0.0704743	1
SNAI1	HepG2	0.0703711	1
E2F1	MCF-7	0.0700252	1
TGIF2	HepG2	0.0698723	1
HEY1	K562	0.0696752	1
CREB3	K562	0.0696357	1
PRDM4	HepG2	0.0695119	1
CLOCK	K562	0.0693337	1
GABPA	HepG2	0.0684549	1
TCF7L2	K562	0.0683465	1
ELK4	HeLa-S3	0.0681195	1
NFE2L1	HepG2	0.0676849	1
TEAD1	HepG2	0.0675506	1
DLX6	HepG2	0.0664561	1
ZBTB33	K562	0.0661371	1
RREB1	K562	0.0659123	1
RFX5	K562	0.0658214	1
RELA	HepG2	0.0655165	1
E2F6	HeLa-S3	0.0654493	1
FOS	K562	0.0651124	1
MNT	K562	0.0649244	1
NFYB	K562	0.0649111	1
HNF1A	HepG2	0.0646683	1
ZBTB7B	MCF-7	0.0645905	1
NR2C2	HepG2	0.0641851	1
ZSCAN29	HepG2	0.0641182	1
SIX1	HepG2	0.0640657	1
SREBF1	K562	0.0639188	1
TEF	HepG2	0.0638779	1
ATF6	HepG2	0.0638092	1
ETV6	K562	0.0636883	1
NFKB2	HepG2	0.0636589	1
ELF3	HepG2	0.0631333	1
ZNF282	K562	0.0630777	1
MLX	K562	0.0630269	1
TBX3	HepG2	0.0627345	1
MEIS2	HepG2	0.0627127	1
SOX18	HepG2	0.0624122	1
TCF3	K562	0.0623326	1
GATA4	HepG2	0.0623047	1
MEIS1	HepG2	0.0618115	1
KLF4	MCF-7	0.0612255	1
RFX3	HepG2	0.0611555	1
ELF1	K562	0.0610331	1
NRF1	HeLa-S3	0.0610214	1
HOXA5	HepG2	0.0607332	1
MXI1	K562	0.0604579	1
MYC	MCF-7	0.059621	1
ETV4	HepG2	0.0595137	1
NFYC	HepG2	0.0594427	1
RBPJ	HepG2	0.0591972	1
REST	K562	0.0591779	1
MYBL2	HepG2	0.0583238	1
E2F8	K562	0.0583227	1
ELK1	HeLa-S3	0.0581464	1
ATF4	HepG2	0.05814	1
HNF1B	HepG2	0.0577149	1
FOXK1	HepG2	0.0575036	1
MXI1	HepG2	0.0573972	1
IRF2	HepG2	0.0573342	1
MAZ	HeLa-S3	0.0572344	1
HSF1	MCF-7	0.0564611	1
FOSL1	HepG2	0.0562896	1
NEUROD1	K562	0.0558316	1
SPDEF	MCF-7	0.0557126	1
NFYA	K562	0.0556733	1
CREB1	K562	0.0556293	1
ELF1	HepG2	0.0551765	1
CREM	K562	0.0549073	1
ZNF143	K562	0.0548191	1
ELF1	MCF-7	0.0543512	1
KLF13	HepG2	0.0541672	1
NR2C2	K562	0.0541597	1
GABPA	MCF-7	0.0535003	1
E2F7	K562	0.0533716	1
ZBED1	K562	0.0529895	1
TEAD2	HepG2	0.0529184	1
MAX	MCF-7	0.0523464	1
FOXK2	HepG2	0.0523158	1
MAX	H1	0.0519945	1
TCF3	HepG2	0.051777	1
THAP11	HepG2	0.0511439	1
HES1	MCF-7	0.0510717	1
CTCF	K562	0.0499384	1
ELF4	K562	0.0493953	1
CREB3L1	K562	0.0492238	1
KLF6	K562	0.048995	1
HES1	K562	0.0489598	1
MYC	HepG2	0.0485535	1
ZNF143	HepG2	0.048272	1
KLF9	MCF-7	0.0481582	1
ZNF740	HepG2	0.0477487	1
EGR1	MCF-7	0.0462592	1
LBX2	HepG2	0.046085	1
NFYB	HepG2	0.0459927	1
MYC	K562	0.0452994	1
ATF6	K562	0.0448996	1
E2F1	K562	0.0448728	1
HINFP	K562	0.044052	1
FOXK2	MCF-7	0.0439467	1
YY1	K562	0.0427082	1
ATF2	H1	0.0420548	1
ATF3	H1	0.0420189	1
KLF16	K562	0.0418897	1
MLX	HepG2	0.04187	1
RFX5	HepG2	0.041743	1
TFE3	HepG2	0.0406961	1
XBP1	HepG2	0.0404941	1
NKX3-1	HepG2	0.0399084	1
ETS2	K562	0.0398481	1
ZNF263	K562	0.0395514	1
MYC	H1	0.0394318	1
E2F4	K562	0.0392741	1
YY1	H1	0.0390623	1
HINFP	HepG2	0.038736	1
MAZ	MCF-7	0.0386807	1
MTF1	HepG2	0.0385757	1
POU5F1	H1	0.0381306	1
POU5F1	K562	0.038045	1
ZBTB33	HepG2	0.0380258	1
ERF	K562	0.0377828	1
E2F6	H1	0.0375168	1
EGR1	HepG2	0.0371984	1
ZNF143	H1	0.0366682	1
KLF13	K562	0.0364397	1
ZBTB7A	HepG2	0.0363969	1
KLF16	HepG2	0.036077	1
CREB1	H1	0.0358648	1
ETV5	K562	0.0358273	1
ATF3	HepG2	0.0356077	1
MAZ	HepG2	0.0347952	1
E2F4	MCF-7	0.0347399	1
KLF6	HepG2	0.0338121	1
KLF9	HepG2	0.0336881	1
KLF11	HepG2	0.0335565	1
EGR1	K562	0.0331209	1
CREM	HepG2	0.0329557	1
NFYA	HepG2	0.0329051	1
ELF2	K562	0.0328039	1
E2F8	MCF-7	0.0320518	1
ETV5	HepG2	0.0315175	1
E2F2	HepG2	0.0305998	1
E2F1	HepG2	0.0304258	1
MXI1	H1	0.0301042	1
ELK1	K562	0.0296793	1
RFX5	H1	0.0292984	1
CREB3	HepG2	0.0292264	1
THAP1	K562	0.0290159	1
ETS1	K562	0.0286514	1
E2F4	HepG2	0.0282889	1
TFDP1	K562	0.0279844	1
TFDP1	HepG2	0.0278123	1
ELF4	HepG2	0.0276414	1
ZBTB7A	K562	0.0275947	1
JUN	H1	0.0274582	1
VEZF1	K562	0.0274516	1
EGR1	H1	0.0272457	1
ZNF148	K562	0.0269724	1
ERF	HepG2	0.0269392	1
ETV6	HepG2	0.0259946	1
SP2	K562	0.0259677	1
YY1	HepG2	0.0258087	1
ZNF740	K562	0.0255746	1
MAZ	K562	0.0255534	1
SP2	HepG2	0.0253982	1
ZBTB14	HepG2	0.0251489	1
NRF1	K562	0.0250423	1
DBP	HepG2	0.02487	1
E2F6	K562	0.0244742	1
ETS1	HepG2	0.0240608	1
SP1	K562	0.0235494	1
CTCFL	K562	0.0233946	1
NRF1	HepG2	0.0229615	1
SP1	MCF-7	0.0229467	1
SP1	H1	0.0226267	1
GABPA	H1	0.0202626	1
SP1	HepG2	0.0184706	1
SP2	H1	0.0180451	1
ELK1	HepG2	0.0173274	1
NRF1	H1	0.016504	1
ELK4	HepG2	0.016058	1
SP4	H1	0.0160443	1
NRF1	MCF-7	0.0146589	1
IRF3	HepG2	0.0142531	1
ELK1	MCF-7	0.013842	1
GMEB2	HepG2	0.0122169	1
FOSL1	H1	0.00923997	1

## Sheet: Figure2b_Enrichment_score
TF_name	cell_line	Enrichment score	p_value
GATA2	K562	6.38618	0
GATA1	K562	6.15333	2.72868e-131
GATA2	HepG2	4.50519	3.59046e-73
LEF1	K562	4.47877	7.67969e-168
FOXA1	K562	4.26512	1.04563e-16
STAT3	HeLa-S3	4.24938	3.05342e-28
HNF1A	HepG2	4.08707	1.31437e-166
HNF4A	HepG2	3.63554	0
TCF7	HepG2	3.51175	6.72226e-93
HNF4G	HepG2	3.3203	1.44279e-165
KLF10	K562	3.30773	1.26959e-05
MEF2D	K562	3.11299	2.65915e-74
CEBPA	HepG2	2.94989	9.5152e-167
RUNX1	K562	2.92849	4.07375e-24
CEBPD	HepG2	2.83933	1.69556e-65
MAFG	K562	2.79034	3.18892e-245
FOXA1	MCF-7	2.77577	2.69232e-61
FOXA1	HepG2	2.76305	1.42303e-197
NFE2L1	K562	2.74968	2.56521e-91
TCF7L2	HepG2	2.72599	4.87979e-134
NR2F2	HepG2	2.696	1.97599e-48
FOXA3	K562	2.61335	2.66456e-65
CEBPB	HeLa-S3	2.57561	5.12004e-43
IRF9	K562	2.57308	2.67633e-23
GATA4	HepG2	2.53672	6.70999e-15
MEF2A	K562	2.50577	4.58537e-47
SOX13	HepG2	2.43031	2.54872e-51
FOXP1	HepG2	2.38286	1.18115e-69
MAFF	K562	2.35388	1.56236e-99
ONECUT2	HepG2	2.32715	4.90316e-26
NFE2	K562	2.28186	6.89313e-181
JUND	HeLa-S3	2.27044	1.21366e-130
FOXA2	HepG2	2.25571	3.38834e-142
BACH1	K562	2.20435	2.95246e-134
DBP	HepG2	2.20024	0.0669604
THRB	HepG2	2.15065	1.49824e-28
GATA3	MCF-7	2.13793	5.19331e-15
JUNB	K562	2.06492	2.40132e-195
SRF	K562	2.04529	2.23484e-44
RXRB	HepG2	2.03032	3.57569e-55
FOXA3	HepG2	2.00836	5.10903e-65
JUND	K562	1.97486	0
MEF2A	HepG2	1.95046	1.77684e-12
RARA	HepG2	1.94657	3.2909e-71
CEBPG	HepG2	1.92421	2.9017e-38
FOS	K562	1.91386	1.19825e-42
MAFK	K562	1.90392	1.75284e-133
FOSL1	K562	1.88973	0
PBX2	K562	1.86893	1.85222e-62
NR4A1	K562	1.86738	8.20341e-26
NFIC	HepG2	1.85591	2.39489e-10
NR5A1	HepG2	1.80674	2.47088e-55
NFIL3	HepG2	1.79571	2.11556e-33
FOS	MCF-7	1.77658	1.11315e-83
FOSL2	MCF-7	1.76172	1.09186e-43
NFATC3	K562	1.7602	6.72446e-16
NR2F2	K562	1.75475	1.1239e-33
ONECUT1	HepG2	1.71557	4.51315e-58
PBX2	HepG2	1.70451	0.00366382
CEBPB	HepG2	1.67829	1.45894e-32
FOXO4	K562	1.65011	0.163438
RBPJ	K562	1.63136	0.00235998
NR2F1	HepG2	1.61368	5.26511e-40
TEF	HepG2	1.61173	1.04847e-06
PRDM1	HeLa-S3	1.59716	0.000475701
HNF1B	HepG2	1.55129	3.21872e-13
HMBOX1	K562	1.54506	7.96766e-14
BCL6	K562	1.4951	0.00539242
NFIX	K562	1.45999	0.0100795
FOSL2	HepG2	1.45543	4.87695e-62
JUND	HepG2	1.44442	2.41505e-57
ATF4	K562	1.43764	1.65032e-41
TCF7L2	MCF-7	1.42074	1.08686e-05
ESRRA	HepG2	1.41942	9.26073e-14
HLF	HepG2	1.40773	1.74314e-35
ZNF274	K562	1.40259	0.0467771
MAFF	HeLa-S3	1.3776	2.27073e-05
TEAD1	HepG2	1.35739	6.93259e-15
FOXK2	K562	1.35162	5.13481e-16
CEBPG	MCF-7	1.34895	0.000250908
IKZF1	K562	1.34772	1.50295e-54
TCF7L2	K562	1.3343	0.0227599
IRF1	K562	1.30689	1.73927e-40
TCF7	K562	1.30479	0.00140351
ZNF652	HepG2	1.29729	5.29079e-06
CEBPG	K562	1.29452	9.21342e-13
CUX1	K562	1.2914	0.00254297
MAFG	HepG2	1.27987	0.00354202
CEBPB	K562	1.26157	5.82147e-17
MAFF	HepG2	1.25435	9.2654e-09
FOS	HeLa-S3	1.2483	2.37372e-05
JUN	HeLa-S3	1.21508	0.00792297
FOXK2	HepG2	1.20302	0.0162375
BCL6	HepG2	1.16701	0.000134495
NFIA	HepG2	1.15227	0.023783
GFI1	HepG2	1.13775	0.00913131
PPARG	HepG2	1.13388	0.00658811
ZNF24	K562	1.13074	1.04028e-11
CEBPB	MCF-7	1.11979	0.0473956
MEIS2	K562	1.114	0.00381862
IRF2	K562	1.10666	0.0135275
PITX1	HepG2	1.09061	0.105864
FOXK1	HepG2	1.08932	0.0658317
NR2F1	K562	1.08422	7.23365e-05
CUX1	MCF-7	1.07825	0.364487
TEAD4	MCF-7	1.07043	0.282018
SRF	MCF-7	1.0616	0.308249
TEAD4	K562	1.06038	0.0616198
MEF2D	HepG2	1.05195	0.230642
NFE2L2	HeLa-S3	1.04829	0.352128
MAFK	MCF-7	1.04616	0.304881
JUND	MCF-7	1.03047	0.279425
TBX18	K562	1.02345	0.430762
TEAD4	HepG2	1.0146	0.364399
ISL2	HepG2	1.00328	0.519094
ESRRA	K562	0.993292	0.599025
RELA	K562	0.990853	0.563435
SMAD3	K562	0.979475	0.589935
MITF	K562	0.968896	0.972379
ATF2	K562	0.967722	0.936953
NFE2L2	HepG2	0.961179	0.744028
NFIB	HepG2	0.954846	0.759036
NFE2	HepG2	0.938408	0.77409
ZNF24	HepG2	0.929029	0.958919
SPI1	K562	0.922141	0.999999
USF1	K562	0.915743	0.999885
SIX1	HepG2	0.911644	0.870204
ZKSCAN1	HeLa-S3	0.911381	0.726857
MAFK	HepG2	0.902167	0.999809
ZEB1	HepG2	0.890945	0.984438
TEAD1	K562	0.887967	0.987764
TCF7L2	HeLa-S3	0.874599	0.972612
ZBTB12	K562	0.864759	0.91257
ZNF384	K562	0.86387	1
ATF4	HepG2	0.841569	0.903558
FOSL1	HepG2	0.83541	0.999999
NFIC	K562	0.832572	1
ESRRB	K562	0.832554	0.765279
USF2	K562	0.827856	1
ZNF460	HepG2	0.820221	1
ATF3	K562	0.816057	1
PKNOX1	K562	0.813241	1
NR2C1	K562	0.811234	1
TFAP4	HepG2	0.808748	1
SRF	HepG2	0.808189	0.999675
IRF1	HepG2	0.802051	0.99664
NR2F2	MCF-7	0.800774	0.99955
ZBTB26	HepG2	0.797218	0.999998
MAFK	HeLa-S3	0.796421	0.999965
MIXL1	HepG2	0.793227	0.997613
ZKSCAN1	K562	0.780393	0.999986
RREB1	HepG2	0.763437	1
TBX2	HepG2	0.758881	1
HOXA5	HepG2	0.754699	0.95582
ZNF384	HepG2	0.753338	1
ATF2	HepG2	0.752386	1
DLX6	HepG2	0.744273	0.978974
NFE2L1	HepG2	0.740651	0.987523
SREBF2	K562	0.73641	0.947293
MGA	K562	0.718789	1
ZNF317	HepG2	0.706783	1
NR3C1	K562	0.69235	0.990066
TBX3	HepG2	0.682052	0.999997
ETV1	K562	0.681002	1
JUN	K562	0.680968	1
TFE3	K562	0.675723	1
HEY1	K562	0.675043	0.967641
ZKSCAN1	HepG2	0.671905	1
MXI1	K562	0.664519	1
RREB1	K562	0.659025	1
ESR1	MCF-7	0.648953	1
MEIS2	HepG2	0.630499	1
CLOCK	K562	0.630039	0.996179
HSF2	HepG2	0.62891	1
JUN	HepG2	0.611	1
NFIB	MCF-7	0.602991	1
TEAD2	K562	0.594044	1
ZKSCAN5	HepG2	0.593166	1
GABPA	K562	0.587926	1
USF1	HepG2	0.583704	1
MEIS1	HepG2	0.583252	0.999984
TFCP2	K562	0.563563	1
SMAD3	HepG2	0.552995	1
ZNF282	K562	0.547598	1
RFX7	K562	0.540035	0.963891
ATF7	HepG2	0.539368	1
ETV6	K562	0.538191	1
RFX1	K562	0.51848	1
ELF3	HepG2	0.510412	1
CREB1	HepG2	0.508717	1
IRF2	HepG2	0.503769	1
MNT	K562	0.496034	1
TP53	HepG2	0.493716	1
ETV4	HepG2	0.491255	1
TCF3	K562	0.488945	1
USF2	HeLa-S3	0.482289	1
CREB3	K562	0.482161	1
BHLHE40	K562	0.472968	1
MXI1	HepG2	0.464917	1
ESRRA	MCF-7	0.463564	1
MAX	K562	0.450208	1
ELF1	K562	0.449648	1
ATF7	K562	0.447279	1
SREBF1	K562	0.4381	1
E2F3	K562	0.435025	1
ZSCAN29	K562	0.434629	1
MAX	HepG2	0.430149	1
IRF5	HepG2	0.410587	1
ZSCAN29	HepG2	0.401252	1
MNT	HepG2	0.400281	1
TGIF2	HepG2	0.399688	1
NR2C2	HepG2	0.394169	1
SREBF1	MCF-7	0.392964	1
NRL	HepG2	0.392866	1
RELA	HepG2	0.388459	1
CREB1	K562	0.382499	1
PKNOX1	MCF-7	0.382235	1
MYBL2	K562	0.379706	1
ZKSCAN1	MCF-7	0.37878	1
NFATC3	HepG2	0.374504	1
RBPJ	HepG2	0.370368	1
USF2	HepG2	0.367669	1
NR2C2	K562	0.365942	1
REST	HeLa-S3	0.365692	1
RFX1	MCF-7	0.362724	1
NEUROD1	K562	0.362511	1
NKX3-1	HepG2	0.359913	0.999991
SNAI1	HepG2	0.358831	1
MTF1	HepG2	0.354545	1
CREB1	MCF-7	0.350597	1
ZNF24	MCF-7	0.349137	1
MNX1	HepG2	0.345189	1
ZBTB7B	HepG2	0.340925	1
SMAD5	K562	0.339298	1
ZNF274	HepG2	0.333219	1
REST	HepG2	0.333116	1
ATF7	MCF-7	0.333058	1
GABPA	HepG2	0.331241	1
HSF1	MCF-7	0.323824	1
MLX	K562	0.317663	1
CREB3L1	K562	0.316827	1
RFX5	HeLa-S3	0.311346	1
ZNF263	HepG2	0.307682	1
KLF6	K562	0.307365	1
MYC	K562	0.307076	1
BHLHE40	HepG2	0.302459	1
MXI1	HeLa-S3	0.295089	1
ISX	HepG2	0.294915	0.999998
HES1	K562	0.293022	1
CLOCK	MCF-7	0.291956	1
ELF1	HepG2	0.291149	1
ELF4	K562	0.280484	1
ATF3	HepG2	0.279789	1
NFYB	K562	0.278597	1
ZNF263	K562	0.275129	1
ZNF143	K562	0.270583	1
MAX	HeLa-S3	0.264013	1
MYBL2	HepG2	0.263333	1
CREM	K562	0.262544	1
E2F8	K562	0.261642	1
TEAD2	HepG2	0.259937	1
REST	K562	0.257237	1
KLF16	K562	0.254859	1
CTCF	MCF-7	0.249515	1
SOX18	HepG2	0.23726	1
ZBED1	K562	0.237126	1
NFYA	K562	0.236718	1
VEZF1	K562	0.233248	1
ZNF740	K562	0.229186	1
MYC	HepG2	0.227869	1
REST	MCF-7	0.227585	1
JUN	MCF-7	0.225712	1
CTCF	HepG2	0.222213	1
MYC	HeLa-S3	0.221245	1
CTCF	HeLa-S3	0.218428	1
TFE3	HepG2	0.214003	1
NR2C2	HeLa-S3	0.213666	1
E2F1	HeLa-S3	0.20912	1
THAP11	HepG2	0.203048	1
RFX1	HepG2	0.203033	1
ZBTB7B	MCF-7	0.199728	1
ZNF148	K562	0.198834	1
CTCF	K562	0.198622	1
EGR1	K562	0.194961	1
MLX	HepG2	0.192121	1
ATF6	HepG2	0.191598	1
ZNF740	HepG2	0.190587	1
XBP1	HepG2	0.18805	1
NFKB2	HepG2	0.187559	1
E2F7	K562	0.184281	1
MNT	MCF-7	0.183901	1
KLF13	K562	0.179567	1
RFX3	HepG2	0.179312	1
ZNF143	HepG2	0.176966	1
YY1	K562	0.174707	1
ERF	K562	0.173685	1
TCF3	HepG2	0.172809	1
ETV5	K562	0.165495	1
ATF6	K562	0.165005	1
MSX2	MCF-7	0.163846	1
ZBTB7A	HepG2	0.160624	1
NFYC	HepG2	0.159509	1
ZBTB7A	K562	0.150214	1
CREM	HepG2	0.145633	1
MAZ	K562	0.142085	1
SPDEF	MCF-7	0.139073	1
ELF1	MCF-7	0.13704	1
GABPA	HeLa-S3	0.131662	1
KLF16	HepG2	0.131441	1
ZBTB33	K562	0.129863	1
EGR1	HepG2	0.129131	1
HES1	MCF-7	0.129119	1
KLF4	MCF-7	0.128982	1
ETV5	HepG2	0.128181	1
OVOL1	MCF-7	0.12807	1
RFX5	MCF-7	0.127773	1
HINFP	K562	0.12749	1
PRDM4	HepG2	0.127277	1
E2F6	K562	0.126448	1
ETS2	K562	0.124622	1
RFX5	K562	0.12288	1
KLF9	HepG2	0.121017	1
NFYB	HeLa-S3	0.120829	1
NFYA	HeLa-S3	0.120639	1
KLF13	HepG2	0.120066	1
TFDP1	K562	0.116201	1
NFYA	HepG2	0.114722	1
ERF	HepG2	0.114107	1
E2F1	K562	0.113908	1
ELK3	K562	0.112507	1
MYC	MCF-7	0.110273	1
NR3C1	HepG2	0.108653	1
CREB3	HepG2	0.108429	1
E2F8	MCF-7	0.108236	1
SREBF2	HeLa-S3	0.107938	1
MAX	MCF-7	0.106548	1
RFX5	HepG2	0.10311	1
MAZ	HepG2	0.102006	1
KLF6	HepG2	0.0967948	1
ZBTB33	MCF-7	0.0947261	1
ELF2	K562	0.0945087	1
NFYB	HepG2	0.0940999	1
NRF1	K562	0.0933621	1
E2F1	MCF-7	0.0921608	1
KLF11	HepG2	0.0907193	1
GABPA	MCF-7	0.0886604	1
HINFP	HepG2	0.0872882	1
CTCFL	K562	0.0868556	1
ETS1	K562	0.0824898	1
MAZ	HeLa-S3	0.0776515	1
THAP1	K562	0.0767756	1
LBX2	HepG2	0.0754534	1
ZBTB33	HepG2	0.0722808	1
ZNF143	HeLa-S3	0.072269	1
ETS1	HepG2	0.0710567	1
EGR1	MCF-7	0.068279	1
ETV6	HepG2	0.0652885	1
TCFL5	K562	0.064289	1
YY1	HepG2	0.0641242	1
ELF4	HepG2	0.0612345	1
KLF9	MCF-7	0.0609455	1
E2F4	HepG2	0.0605104	1
E2F2	HepG2	0.0599147	1
ZBTB14	HepG2	0.0567942	1
TFDP1	HepG2	0.0564436	1
IRF3	HepG2	0.0543264	1
GMEB2	HepG2	0.0543262	1
SP1	K562	0.0522618	1
ELK1	K562	0.0464145	1
MAZ	MCF-7	0.0462084	1
E2F6	HeLa-S3	0.0459191	1
NRF1	HepG2	0.0445809	1
ELK4	HeLa-S3	0.0431791	1
SP2	K562	0.0428745	1
SP2	HepG2	0.0423955	1
FOXK2	MCF-7	0.041372	1
E2F1	HepG2	0.0406124	1
SP1	HepG2	0.0371694	1
E2F4	HeLa-S3	0.0354619	1
ELK1	HepG2	0.0330365	1
ELK1	HeLa-S3	0.031342	1
ELK4	HepG2	0.0253007	1
E2F4	K562	0.0204064	1
E2F4	MCF-7	0.013038	1
SP1	MCF-7	0.0120898	1
NRF1	MCF-7	0.0107543	1
NRF1	HeLa-S3	0.00981534	1
ELK1	MCF-7	0.00914196	1
