# Supplementary material for: Detection of new pioneer transcription factors as cell-type-specific nucleosome binders
Source: eLife. 2024 Jan 31;12:RP88936. doi: 10.7554/eLife.88936 (PMC10945518; doi:10.7554/eLife.88936)
Supplement: Figure 3—source data 1. [file elife-88936-fig3-data1.xlsx]

## Sheet: Sheet1
TFs with negative correlation coefficients (correlation coefficient <= -0.4 and p-value < 0.05) between motif profile and nucleosome occupancy.
TF_name	Cell_line
HOXA5	HepG2
STAT3	HeLaS3
MAX	HepG2
NFE2	HepG2
REST	HepG2
NFIC	HepG2
USF2	HepG2
TEAD1	K562
MXI1	K562
MAZ	HeLaS3
MITF	K562
NRF1	HeLaS3
ZBTB26	HepG2
SP1	MCF7
TBX3	HepG2
ZNF143	H1
E2F4	HeLaS3
CTCF	HepG2
FOS	MCF7
TFAP4	HepG2
SREBF1	K562
NR2C2	HepG2
ZSCAN29	K562
TCF7L2	HeLaS3
HLF	HepG2
ZNF263	HepG2
ONECUT1	HepG2
MEIS1	HepG2
CREB1	HepG2
FOXA1	MCF7
KLF13	HepG2
FOSL2	MCF7
HES1	MCF7
JUND	H1
MAFG	HepG2
E2F1	HeLaS3
MTF1	HepG2
TEAD4	K562
ONECUT2	HepG2
BCL6	HepG2
MAFF	HeLaS3
IRF2	HepG2
NFE2L2	HepG2
E2F1	K562
NR2F2	HepG2
KLF9	MCF7
RFX1	MCF7
NEUROD1	K562
REST	MCF7
KLF6	K562
CTCF	K562
ATF7	MCF7
NR2F2	K562
NR2C2	K562
PRDM1	HeLaS3
GABPA	HeLaS3
CLOCK	MCF7
E2F6	HeLaS3
ZNF263	K562
MNT	K562
TGIF2	HepG2
ZNF274	H1
JUN	H1
ELK1	HeLaS3
E2F4	K562
HINFP	HepG2
EGR1	HepG2
SRF	H1
CREB3	HepG2
MAFK	MCF7
GFI1	HepG2
ELK4	HeLaS3
MAFK	HepG2
NFE2	K562
ZBTB14	HepG2
HNF4G	HepG2
RREB1	K562
CREB3L1	K562
ATF7	HepG2
OVOL1	MCF7
GATA2	K562
CEBPB	MCF7
GATA4	HepG2
NRF1	MCF7
E2F1	MCF7
RBPJ	HepG2
SRF	HepG2
HNF1A	HepG2
JUND	HepG2
ZBTB33	HepG2
ZBTB7A	K562
ERF	K562
HNF1B	HepG2
CEBPG	MCF7
TFDP1	K562
NFE2L1	K562
MAZ	HepG2
RUNX1	K562
NFYA	K562
ATF2	HepG2
CTCFL	K562
PKNOX1	K562
KLF6	HepG2
SRF	MCF7
TCF7	K562
IRF3	HeLaS3
ZNF740	HepG2
KLF9	HepG2
RXRB	HepG2
ZNF143	HeLaS3
TCF7L2	HepG2
CEBPB	HepG2
FOSL2	HepG2
FOSL1	K562
THAP1	K562
KLF16	HepG2
SP2	K562
MLX	HepG2
KLF11	HepG2
TFDP1	HepG2
TFE3	HepG2
FOS	K562
E2F1	HepG2
SOX13	HepG2
RFX1	HepG2
USF2	K562
MAFK	K562
ETS1	K562
THAP11	HepG2
FOSL1	HepG2
REST	K562
SPI1	K562
FOXP1	HepG2
ELK1	MCF7
MAZ	K562
E2F6	K562
ETV6	K562
MEIS2	K562
MXI1	HepG2
MYC	HepG2
ELK1	K562
ZNF148	K562
USF1	K562
KLF16	K562
RFX5	MCF7
SP2	HepG2
ZNF143	K562
SPDEF	MCF7
VEZF1	K562
SIX1	HepG2
EGR1	K562
NFYA	HepG2
JUNB	K562
JUN	K562
KLF13	K562
TCF7	HepG2
RFX5	HepG2
NFYB	K562
MAX	MCF7
ZNF384	K562
JUND	K562
CEBPA	HepG2
NRF1	K562
IKZF1	K562
YY1	K562
JUN	MCF7
JUN	HepG2
FOXA1	HepG2
FOXK1	HepG2
ZBTB33	K562
ZNF143	HepG2
CREM	HepG2
GABPA	K562
ZBTB7A	HepG2
BACH1	K562
ELK4	HepG2
ATF4	HepG2
ATF7	K562
GABPA	MCF7
YY1	HepG2
NFE2L1	HepG2
ETV1	K562
FOXA3	HepG2
TEF	HepG2
CEBPG	HepG2
YY1	H1
NFYB	HepG2
CREB1	K562
SP1	HepG2
ETV6	HepG2
ELF4	K562
CREM	K562
FOXA2	HepG2
ETV5	HepG2
ETV5	K562
GATA2	HepG2
GABPA	HepG2
NRF1	HepG2
ELF1	MCF7
ZNF384	HepG2
FOXK2	HepG2
ELF2	K562
ELF1	K562
MYC	K562
NFYC	HepG2
E2F4	HepG2
ELK1	HepG2
SP1	K562
ERF	HepG2
ELF3	HepG2
ELF4	HepG2
ETV4	HepG2
ETS1	HepG2
ZNF740	K562
ATF3	HepG2
CEBPD	HepG2
TEAD1	HepG2
ELF1	HepG2
RFX3	HepG2
NFIL3	HepG2
TEAD4	HepG2
MEIS2	HepG2
PKNOX1	MCF7

## Sheet: Sheet2
TFs with positive (correlation coefficient >= 0.2 and p-value < 0.05) correlation coefficients between motif profile and nucleosome occupancy.
TF_name	Cell_line
ZKSCAN1	HeLaS3
ZKSCAN1	K562
ZKSCAN1	MCF7
ESR1	MCF7
NFATC3	K562
ZBTB7B	MCF7
MAX	H1
TBX2	HepG2
NFIB	MCF7
USF1	H1
CUX1	MCF7
ZNF274	HepG2
ZBTB7B	HepG2
SREBF1	MCF7
ZKSCAN1	HepG2
NFYB	HeLaS3
ZNF24	MCF7
NR2F2	MCF7
ZNF282	K562
RELA	K562
USF2	HeLaS3
ESRRA	MCF7
POU5F1	H1
NFKB2	HepG2
BACH1	H1
SREBF2	HeLaS3

## Sheet: Sheet3
binding_sites	ZKSCAN1_HeLaS3_binding_profile	nucleosome occupancy level
-399	0.35055	0.492661
-398	0.356123	0.492406
-397	0.364415	0.492132
-396	0.374881	0.491839
-395	0.386842	0.491526
-394	0.399076	0.491193
-393	0.410765	0.49084
-392	0.421775	0.490466
-391	0.433193	0.490071
-390	0.444611	0.489654
-389	0.454533	0.489217
-388	0.462417	0.488758
-387	0.467446	0.488277
-386	0.469077	0.487775
-385	0.468805	0.48725
-384	0.466494	0.486704
-383	0.463776	0.486137
-382	0.459019	0.485549
-381	0.452902	0.484941
-380	0.445018	0.484315
-379	0.435911	0.48367
-378	0.426397	0.483009
-377	0.416882	0.482332
-376	0.406144	0.48164
-375	0.393639	0.480935
-374	0.379774	0.480217
-373	0.365094	0.479489
-372	0.35055	0.478752
-371	0.33723	0.478009
-370	0.324589	0.477261
-369	0.312627	0.476511
-368	0.301753	0.475758
-367	0.292918	0.475005
-366	0.285714	0.474253
-365	0.279462	0.473503
-364	0.27552	0.472754
-363	0.272937	0.47201
-362	0.27117	0.47127
-361	0.271306	0.470536
-360	0.274297	0.46981
-359	0.279326	0.469092
-358	0.286122	0.468383
-357	0.296045	0.467683
-356	0.309093	0.466992
-355	0.324045	0.466311
-354	0.341851	0.46564
-353	0.362376	0.464978
-352	0.384124	0.464327
-351	0.404785	0.463686
-350	0.425037	0.463056
-349	0.444611	0.462439
-348	0.461329	0.461834
-347	0.47533	0.461241
-346	0.486747	0.460661
-345	0.494631	0.460094
-344	0.498301	0.459539
-343	0.499524	0.458998
-342	0.499252	0.458469
-341	0.49599	0.457955
-340	0.489194	0.457455
-339	0.479951	0.45697
-338	0.46799	0.456501
-337	0.453038	0.456047
-336	0.436319	0.455609
-335	0.419464	0.455187
-334	0.402066	0.454782
-333	0.384804	0.454393
-332	0.369444	0.454022
-331	0.356259	0.453669
-330	0.345385	0.453334
-329	0.33655	0.453018
-328	0.330977	0.452721
-327	0.3269	0.452443
-326	0.32323	0.452185
-325	0.319831	0.451946
-324	0.316433	0.451727
-323	0.312627	0.451529
-322	0.308414	0.451352
-321	0.303792	0.451198
-320	0.298355	0.451067
-319	0.290744	0.450961
-318	0.282452	0.450879
-317	0.273481	0.450824
-316	0.263694	0.450795
-315	0.253228	0.450794
-314	0.241811	0.450821
-313	0.230665	0.450877
-312	0.218839	0.450963
-311	0.207557	0.451081
-310	0.197091	0.451231
-309	0.187305	0.451414
-308	0.178741	0.451633
-307	0.171401	0.451887
-306	0.165557	0.452177
-305	0.161887	0.452504
-304	0.159304	0.452868
-303	0.159984	0.453269
-302	0.16243	0.453707
-301	0.166236	0.454184
-300	0.171401	0.454701
-299	0.177926	0.455257
-298	0.186489	0.455855
-297	0.195188	0.456495
-296	0.204023	0.457176
-295	0.212723	0.4579
-294	0.220606	0.458667
-293	0.228762	0.459477
-292	0.236917	0.460331
-291	0.244121	0.46123
-290	0.249422	0.462174
-289	0.251597	0.463165
-288	0.25282	0.464205
-287	0.251597	0.465293
-286	0.248879	0.46643
-285	0.244257	0.467617
-284	0.237461	0.468855
-283	0.228626	0.470144
-282	0.217616	0.471485
-281	0.206198	0.472879
-280	0.195052	0.474328
-279	0.184586	0.475832
-278	0.175751	0.477394
-277	0.16746	0.479013
-276	0.160391	0.480692
-275	0.155226	0.482429
-274	0.153187	0.484226
-273	0.154819	0.486083
-272	0.15944	0.487999
-271	0.167052	0.489976
-270	0.176431	0.492016
-269	0.188392	0.494119
-268	0.203072	0.496286
-267	0.220334	0.498517
-266	0.240315	0.500814
-265	0.262879	0.503175
-264	0.288705	0.505601
-263	0.316297	0.508089
-262	0.345521	0.51064
-261	0.377192	0.513253
-260	0.410629	0.51593
-259	0.446514	0.518672
-258	0.483621	0.521479
-257	0.522224	0.524352
-256	0.560011	0.527294
-255	0.596031	0.530303
-254	0.631236	0.53338
-253	0.665625	0.536525
-252	0.699062	0.539738
-251	0.731004	0.54302
-250	0.759957	0.546372
-249	0.784559	0.549794
-248	0.802773	0.553288
-247	0.816094	0.556856
-246	0.824249	0.5605
-245	0.826288	0.564217
-244	0.822074	0.568008
-243	0.810657	0.57187
-242	0.79353	0.575801
-241	0.771918	0.579797
-240	0.749083	0.583855
-239	0.725975	0.58797
-238	0.702732	0.592132
-237	0.679353	0.596318
-236	0.656382	0.600497
-235	0.63409	0.604638
-234	0.613565	0.608705
-233	0.595487	0.612664
-232	0.580128	0.616478
-231	0.566671	0.620112
-230	0.556613	0.62353
-229	0.550768	0.626699
-228	0.549137	0.629584
-227	0.551584	0.632153
-226	0.556613	0.634372
-225	0.56205	0.636209
-224	0.565992	0.637634
-223	0.569118	0.638617
-222	0.571429	0.639139
-221	0.571293	0.639211
-220	0.567351	0.638848
-219	0.559739	0.638079
-218	0.549409	0.636934
-217	0.536904	0.635441
-216	0.523583	0.63363
-215	0.510126	0.631532
-214	0.493272	0.629175
-213	0.472747	0.626589
-212	0.449096	0.623803
-211	0.423678	0.620848
-210	0.397716	0.617752
-209	0.371483	0.614545
-208	0.345929	0.611257
-207	0.320103	0.607915
-206	0.292511	0.604543
-205	0.265869	0.60115
-204	0.242218	0.597742
-203	0.22183	0.594318
-202	0.203752	0.590876
-201	0.187169	0.587418
-200	0.171401	0.583942
-199	0.155906	0.580448
-198	0.144624	0.576937
-197	0.138236	0.573408
-196	0.136605	0.56986
-195	0.137692	0.566293
-194	0.140818	0.562706
-193	0.146119	0.559099
-192	0.153595	0.555471
-191	0.164741	0.551821
-190	0.180916	0.548149
-189	0.199538	0.544456
-188	0.218839	0.54074
-187	0.238276	0.537002
-186	0.257442	0.533242
-185	0.277423	0.529459
-184	0.298219	0.525653
-183	0.319696	0.521824
-182	0.338317	0.517972
-181	0.353541	0.514096
-180	0.365774	0.510197
-179	0.376784	0.506274
-178	0.387522	0.502328
-177	0.39894	0.498358
-176	0.409814	0.494364
-175	0.419057	0.490346
-174	0.426261	0.486304
-173	0.433873	0.482235
-172	0.441892	0.478139
-171	0.449912	0.474016
-170	0.458611	0.469865
-169	0.466359	0.465686
-168	0.473155	0.461477
-167	0.479679	0.457239
-166	0.487427	0.452971
-165	0.496806	0.448673
-164	0.506185	0.444344
-163	0.515971	0.439982
-162	0.524399	0.435588
-161	0.530787	0.431161
-160	0.535952	0.426699
-159	0.539622	0.422203
-158	0.541525	0.417672
-157	0.540438	0.413107
-156	0.536088	0.408508
-155	0.529428	0.403875
-154	0.519777	0.399208
-153	0.508903	0.394507
-152	0.496806	0.389771
-151	0.483213	0.384999
-150	0.468126	0.38019
-149	0.451543	0.375345
-148	0.434688	0.370464
-147	0.41661	0.365545
-146	0.399076	0.36059
-145	0.381677	0.355598
-144	0.364687	0.350569
-143	0.34824	0.345502
-142	0.333016	0.340397
-141	0.318744	0.335252
-140	0.306647	0.330067
-139	0.297268	0.324841
-138	0.290879	0.319572
-137	0.286394	0.314262
-136	0.283947	0.308909
-135	0.282996	0.303514
-134	0.283947	0.298075
-133	0.285986	0.292592
-132	0.289384	0.287065
-131	0.293734	0.28149
-130	0.297268	0.275869
-129	0.301889	0.2702
-128	0.30719	0.264484
-127	0.313307	0.258719
-126	0.320511	0.252907
-125	0.328667	0.247047
-124	0.337774	0.241139
-123	0.346337	0.235183
-122	0.355172	0.229178
-121	0.364959	0.223124
-120	0.374473	0.21702
-119	0.38358	0.210865
-118	0.391328	0.204661
-117	0.397852	0.198408
-116	0.402338	0.192107
-115	0.404785	0.185759
-114	0.406688	0.179364
-113	0.405328	0.172921
-112	0.400299	0.16643
-111	0.391872	0.159891
-110	0.379503	0.153301
-109	0.364551	0.146661
-108	0.346609	0.13997
-107	0.3269	0.133227
-106	0.303928	0.126432
-105	0.276471	0.119586
-104	0.24684	0.112688
-103	0.216393	0.105737
-102	0.186081	0.0987344
-101	0.155906	0.0916773
-100	0.126138	0.0845646
-99	0.0974582	0.0773955
-98	0.0693217	0.0701706
-97	0.0448552	0.0628915
-96	0.0258257	0.0555595
-95	0.0118255	0.0481771
-94	0.00299035	0.040748
-93	0	0.0332761
-92	0.00366997	0.0257665
-91	0.0130488	0.0182287
-90	0.0293598	0.0106872
-89	0.0538263	0.00316923
-88	0.0837298	0
-87	0.118119	0.00121304
-86	0.156042	0.00684238
-85	0.197635	0.0169227
-84	0.241267	0.0314886
-83	0.286258	0.0505743
-82	0.333288	0.0742129
-81	0.379231	0.102437
-80	0.422999	0.135278
-79	0.465679	0.172768
-78	0.506049	0.214936
-77	0.540166	0.261811
-76	0.566807	0.31342
-75	0.586788	0.36978
-74	0.599837	0.43088
-73	0.605274	0.496702
-72	0.605682	0.558632
-71	0.600652	0.616639
-70	0.59073	0.670695
-69	0.577001	0.720766
-68	0.563681	0.766824
-67	0.552399	0.808837
-66	0.542069	0.846773
-65	0.534457	0.880604
-64	0.5297	0.910299
-63	0.52603	0.935828
-62	0.52467	0.95716
-61	0.528748	0.974268
-60	0.538263	0.987123
-59	0.553486	0.995701
-58	0.572924	0.999994
-57	0.596711	0.999995
-56	0.624032	0.999995
-55	0.655702	0.999996
-54	0.692945	0.999996
-53	0.734267	0.999997
-52	0.77586	0.999997
-51	0.815686	0.999998
-50	0.852657	0.999998
-49	0.886503	0.999998
-48	0.91627	0.999999
-47	0.942096	0.999999
-46	0.963844	0.999999
-45	0.978932	0.999999
-44	0.988582	1
-43	0.991709	1
-42	0.990893	1
-41	0.986408	1
-40	0.977301	1
-39	0.963436	1
-38	0.94264	1
-37	0.915183	1
-36	0.883648	1
-35	0.848444	1
-34	0.811744	1
-33	0.773821	1
-32	0.73549	1
-31	0.698111	1
-30	0.661411	1
-29	0.628517	1
-28	0.597662	1
-27	0.569118	1
-26	0.541525	1
-25	0.515292	1
-24	0.490689	1
-23	0.467446	0.999999
-22	0.447193	0.999999
-21	0.430882	0.999999
-20	0.416882	0.999999
-19	0.406008	0.999999
-18	0.398124	0.999999
-17	0.392823	0.999999
-16	0.389969	0.999999
-15	0.389697	0.999998
-14	0.393911	0.999998
-13	0.400435	0.999998
-12	0.410765	0.999998
-11	0.42463	0.999998
-10	0.442164	0.999998
-9	0.461601	0.999998
-8	0.483349	0.999998
-7	0.50768	0.999997
-6	0.532554	0.999997
-5	0.556341	0.999997
-4	0.580807	0.999997
-3	0.605682	0.999997
-2	0.630828	0.999997
-1	0.655566	0.999997
0	0.680033	0.999997
1	0.70246	0.999997
2	0.719723	0.999997
3	0.733587	0.999997
4	0.743102	0.999997
5	0.748267	0.999997
6	0.749354	0.999997
7	0.748267	0.999997
8	0.746092	0.999998
9	0.742422	0.999998
10	0.739976	0.999998
11	0.740383	0.999998
12	0.740655	0.999998
13	0.740247	0.999998
14	0.737393	0.999998
15	0.732364	0.999998
16	0.725703	0.999999
17	0.719451	0.999999
18	0.715917	0.999999
19	0.713062	0.999999
20	0.711431	0.999999
21	0.712111	0.999999
22	0.715509	0.999999
23	0.721762	0.999999
24	0.730053	1
25	0.739976	1
26	0.74949	1
27	0.757782	1
28	0.767568	1
29	0.780073	1
30	0.7972	1
31	0.819356	1
32	0.844366	1
33	0.869104	1
34	0.892347	1
35	0.915183	1
36	0.937746	1
37	0.959087	1
38	0.977029	1
39	0.989942	1
40	0.997146	1
41	1	1
42	0.999728	1
43	0.995922	1
44	0.986	1
45	0.968737	0.999999
46	0.943183	0.999999
47	0.909882	0.999999
48	0.870871	0.999999
49	0.828599	0.999998
50	0.784015	0.999998
51	0.737121	0.999998
52	0.687101	0.999997
53	0.635449	0.999997
54	0.585293	0.999996
55	0.537719	0.999996
56	0.492592	0.999995
57	0.449368	0.999995
58	0.407775	0.999994
59	0.368357	0.995701
60	0.334104	0.987123
61	0.305831	0.974268
62	0.283947	0.95716
63	0.266413	0.935828
64	0.253092	0.910299
65	0.244665	0.880604
66	0.240315	0.846773
67	0.240451	0.808837
68	0.245888	0.766824
69	0.254044	0.720766
70	0.263015	0.670695
71	0.27253	0.616639
72	0.283132	0.558632
73	0.294278	0.496702
74	0.304744	0.43088
75	0.315074	0.36978
76	0.322822	0.31342
77	0.327579	0.261811
78	0.329618	0.214936
79	0.330977	0.172768
80	0.330434	0.135278
81	0.326628	0.102437
82	0.320375	0.0742129
83	0.31154	0.0505743
84	0.299443	0.0314886
85	0.285442	0.0169227
86	0.268996	0.00684238
87	0.250374	0.00121304
88	0.229713	0
89	0.208237	0.00316923
90	0.186897	0.0106872
91	0.164741	0.0182287
92	0.143129	0.0257665
93	0.12342	0.0332761
94	0.106293	0.040748
95	0.0916134	0.0481771
96	0.0812831	0.0555595
97	0.0755743	0.0628915
98	0.0733995	0.0701706
99	0.0744869	0.0773955
100	0.0795161	0.0845646
101	0.0882153	0.0916773
102	0.100584	0.0987344
103	0.115672	0.105737
104	0.134022	0.112688
105	0.153595	0.119586
106	0.1748	0.126432
107	0.19845	0.133227
108	0.224548	0.13997
109	0.250646	0.146661
110	0.27552	0.153301
111	0.298355	0.159891
112	0.317657	0.16643
113	0.333288	0.172921
114	0.346337	0.179364
115	0.356667	0.185759
116	0.363871	0.192107
117	0.368221	0.198408
118	0.370939	0.204661
119	0.373114	0.210865
120	0.37393	0.21702
121	0.374881	0.223124
122	0.375289	0.229178
123	0.374066	0.235183
124	0.371075	0.241139
125	0.366454	0.247047
126	0.360745	0.252907
127	0.355036	0.258719
128	0.350279	0.264484
129	0.347288	0.2702
130	0.345657	0.275869
131	0.345385	0.28149
132	0.34756	0.287065
133	0.351502	0.292592
134	0.357483	0.298075
135	0.364687	0.303514
136	0.373114	0.308909
137	0.382357	0.314262
138	0.392144	0.319572
139	0.403425	0.324841
140	0.416066	0.330067
141	0.430203	0.335252
142	0.445698	0.340397
143	0.462009	0.345502
144	0.478048	0.350569
145	0.49232	0.355598
146	0.504553	0.36059
147	0.514748	0.365545
148	0.521408	0.370463
149	0.526166	0.375345
150	0.528476	0.38019
151	0.528612	0.384999
152	0.526845	0.389771
153	0.523991	0.394507
154	0.521408	0.399208
155	0.518826	0.403875
156	0.515835	0.408508
157	0.514204	0.413107
158	0.512573	0.417672
159	0.51135	0.422203
160	0.51067	0.426699
161	0.51135	0.431161
162	0.513253	0.435588
163	0.516243	0.439982
164	0.520593	0.444343
165	0.525486	0.448673
166	0.530787	0.452971
167	0.537311	0.457239
168	0.5437	0.461477
169	0.549817	0.465686
170	0.55471	0.469865
171	0.558108	0.474016
172	0.560826	0.478139
173	0.561778	0.482235
174	0.56205	0.486303
175	0.560419	0.490346
176	0.557021	0.494364
177	0.552127	0.498358
178	0.546011	0.502328
179	0.539486	0.506274
180	0.532826	0.510197
181	0.525486	0.514096
182	0.517195	0.517972
183	0.507136	0.521824
184	0.497349	0.525653
185	0.486883	0.529459
186	0.476553	0.533242
187	0.46663	0.537002
188	0.454805	0.54074
189	0.441348	0.544455
190	0.427212	0.548149
191	0.413484	0.551821
192	0.401251	0.555471
193	0.389969	0.559099
194	0.37991	0.562706
195	0.370124	0.566293
196	0.361017	0.56986
197	0.353949	0.573408
198	0.349599	0.576937
199	0.34756	0.580448
200	0.347424	0.583942
201	0.349463	0.587418
202	0.352046	0.590876
203	0.355852	0.594317
204	0.363735	0.597742
205	0.375289	0.60115
206	0.389425	0.604543
207	0.405192	0.607915
208	0.421911	0.611257
209	0.439445	0.614545
210	0.456436	0.617751
211	0.474106	0.620847
212	0.491097	0.623803
213	0.505369	0.626589
214	0.517195	0.629175
215	0.527525	0.631532
216	0.536904	0.63363
217	0.545059	0.635441
218	0.553758	0.636934
219	0.562729	0.638079
220	0.570341	0.638848
221	0.577273	0.639211
222	0.584206	0.639139
223	0.591274	0.638617
224	0.59807	0.637634
225	0.604186	0.636209
226	0.611255	0.634372
227	0.617779	0.632153
228	0.624847	0.629584
229	0.634226	0.626699
230	0.644284	0.62353
231	0.655022	0.620111
232	0.663993	0.616478
233	0.672013	0.612664
234	0.677858	0.608705
235	0.68044	0.604638
236	0.680169	0.600497
237	0.677586	0.596317
238	0.671741	0.592132
239	0.663314	0.58797
240	0.651624	0.583855
241	0.638711	0.579797
242	0.623488	0.575801
243	0.607041	0.57187
244	0.589914	0.568008
245	0.571157	0.564217
246	0.55104	0.560499
247	0.529156	0.556856
248	0.507544	0.553288
249	0.485932	0.549794
250	0.464592	0.546372
251	0.444339	0.54302
252	0.425173	0.539738
253	0.40492	0.536525
254	0.384124	0.53338
255	0.362648	0.530303
256	0.341715	0.527294
257	0.319696	0.524352
258	0.298219	0.521479
259	0.277287	0.518672
260	0.25649	0.51593
261	0.23583	0.513253
262	0.216528	0.510639
263	0.198994	0.508089
264	0.182275	0.505601
265	0.166236	0.503175
266	0.151556	0.500814
267	0.13742	0.498517
268	0.123692	0.496286
269	0.112002	0.494119
270	0.103031	0.492016
271	0.0965067	0.489976
272	0.0921571	0.487999
273	0.0910697	0.486082
274	0.0912057	0.484226
275	0.0920212	0.482429
276	0.0925649	0.480691
277	0.094196	0.479013
278	0.0967786	0.477394
279	0.099633	0.475832
280	0.103031	0.474328
281	0.106701	0.472879
282	0.109963	0.471485
283	0.114313	0.470144
284	0.12043	0.468855
285	0.128041	0.467617
286	0.136061	0.46643
287	0.144216	0.465293
288	0.152916	0.464205
289	0.162023	0.463165
290	0.173168	0.462174
291	0.185674	0.46123
292	0.200761	0.460331
293	0.216393	0.459477
294	0.231888	0.458667
295	0.246296	0.4579
296	0.260432	0.457176
297	0.274568	0.456494
298	0.288161	0.455855
299	0.300394	0.455257
300	0.311268	0.454701
301	0.319967	0.454184
302	0.326356	0.453707
303	0.331929	0.453269
304	0.336278	0.452868
305	0.337638	0.452504
306	0.334647	0.452177
307	0.328667	0.451887
308	0.318608	0.451633
309	0.305695	0.451414
310	0.290336	0.451231
311	0.275384	0.451081
312	0.259345	0.450963
313	0.242354	0.450877
314	0.225771	0.450821
315	0.210276	0.450794
316	0.195596	0.450795
317	0.182683	0.450824
318	0.172081	0.450879
319	0.16311	0.450961
320	0.155906	0.451067
321	0.152372	0.451198
322	0.153867	0.451352
323	0.160256	0.451529
324	0.171945	0.451727
325	0.188392	0.451946
326	0.209189	0.452185
327	0.23216	0.452443
328	0.25785	0.452721
329	0.285442	0.453018
330	0.314259	0.453334
331	0.342803	0.453669
332	0.369852	0.454022
333	0.395134	0.454393
334	0.418921	0.454781
335	0.440261	0.455187
336	0.459155	0.455609
337	0.474786	0.456047
338	0.486611	0.456501
339	0.493272	0.45697
340	0.495311	0.457455
341	0.493136	0.457955
342	0.488107	0.458469
343	0.480903	0.458997
344	0.472475	0.459539
345	0.464048	0.460094
346	0.454941	0.460661
347	0.445698	0.461241
348	0.438086	0.461834
349	0.43197	0.462439
350	0.427348	0.463056
351	0.42327	0.463686
352	0.419193	0.464326
353	0.415387	0.464978
354	0.411309	0.465639
355	0.40859	0.466311
356	0.406823	0.466992
357	0.406416	0.467683
358	0.4056	0.468383
359	0.404513	0.469092
360	0.403153	0.46981
361	0.401251	0.470536
362	0.399076	0.47127
363	0.397445	0.472009
364	0.395406	0.472754
365	0.392687	0.473502
366	0.388881	0.474253
367	0.386435	0.475005
368	0.385483	0.475758
369	0.385483	0.47651
370	0.386435	0.477261
371	0.387658	0.478009
372	0.389153	0.478752
373	0.390377	0.479489
374	0.392279	0.480217
375	0.393503	0.480934
376	0.393095	0.48164
377	0.390512	0.482332
378	0.386571	0.483009
379	0.381134	0.48367
380	0.374881	0.484314
381	0.368357	0.484941
382	0.36156	0.485549
383	0.353813	0.486136
384	0.346201	0.486704
385	0.339269	0.48725
386	0.33356	0.487774
387	0.329482	0.488277
388	0.326628	0.488758
389	0.324589	0.489217
390	0.322686	0.489654
391	0.322958	0.49007
392	0.324861	0.490465
393	0.328803	0.49084
394	0.334647	0.491193
395	0.342395	0.491526
396	0.350958	0.491839
397	0.360881	0.492132
398	0.37325	0.492406
399	0.387658	0.492661

## Sheet: Sheet4
binding_sites	CTCF_MCF7_binding_profile	nucleosome occupancy level
-399	0.156028	0.520639
-398	0.158169	0.520407
-397	0.160505	0.520151
-396	0.163015	0.519869
-395	0.165682	0.519563
-394	0.168514	0.519232
-393	0.171481	0.518877
-392	0.174555	0.518497
-391	0.177736	0.518092
-390	0.181	0.517664
-389	0.184331	0.517213
-388	0.187769	0.516738
-387	0.191308	0.516239
-386	0.194915	0.515717
-385	0.19864	0.51517
-384	0.202518	0.5146
-383	0.206597	0.514007
-382	0.210922	0.513392
-381	0.215485	0.512755
-380	0.22032	0.512098
-379	0.225513	0.511422
-378	0.231095	0.510727
-377	0.237087	0.510014
-376	0.243534	0.509285
-375	0.250476	0.508539
-374	0.25795	0.50778
-373	0.266012	0.507008
-372	0.274674	0.506225
-371	0.283967	0.505433
-370	0.293946	0.504634
-369	0.304601	0.503829
-368	0.315911	0.50302
-367	0.327894	0.502209
-366	0.340545	0.501397
-365	0.353867	0.500586
-364	0.367819	0.499776
-363	0.382333	0.498968
-362	0.397381	0.498164
-361	0.412958	0.497365
-360	0.429004	0.496571
-359	0.445436	0.495784
-358	0.462216	0.495002
-357	0.479264	0.494228
-356	0.496511	0.493461
-355	0.513901	0.492702
-354	0.531376	0.49195
-353	0.548869	0.491205
-352	0.566366	0.490469
-351	0.583736	0.489742
-350	0.600902	0.489024
-349	0.617802	0.488314
-348	0.634379	0.487613
-347	0.650567	0.486922
-346	0.666287	0.486239
-345	0.68148	0.485566
-344	0.696096	0.484904
-343	0.710126	0.484252
-342	0.723498	0.48361
-341	0.736194	0.48298
-340	0.748187	0.482361
-339	0.759427	0.481753
-338	0.769823	0.481158
-337	0.77936	0.480573
-336	0.787945	0.48
-335	0.795579	0.479437
-334	0.802239	0.478886
-333	0.80787	0.478346
-332	0.812491	0.477818
-331	0.816094	0.477303
-330	0.818669	0.476799
-329	0.820209	0.476309
-328	0.820714	0.475832
-327	0.820136	0.475369
-326	0.818475	0.47492
-325	0.815683	0.474486
-324	0.811727	0.474067
-323	0.806612	0.473664
-322	0.800369	0.473278
-321	0.792995	0.472911
-320	0.784532	0.472564
-319	0.775041	0.472237
-318	0.764518	0.471933
-317	0.753041	0.471652
-316	0.740595	0.471395
-315	0.727192	0.471164
-314	0.712876	0.470959
-313	0.697659	0.470782
-312	0.681619	0.470634
-311	0.664858	0.470516
-310	0.647418	0.47043
-309	0.629404	0.470377
-308	0.610937	0.470361
-307	0.592095	0.470383
-306	0.573006	0.470444
-305	0.553763	0.470545
-304	0.534437	0.470688
-303	0.515075	0.470873
-302	0.495785	0.471104
-301	0.476604	0.471381
-300	0.45763	0.471707
-299	0.438946	0.472083
-298	0.420628	0.472511
-297	0.402758	0.472991
-296	0.385372	0.473526
-295	0.368497	0.474114
-294	0.352228	0.474757
-293	0.336587	0.475456
-292	0.321567	0.47621
-291	0.30721	0.47702
-290	0.293495	0.477888
-289	0.280399	0.478816
-288	0.267931	0.479803
-287	0.256085	0.480851
-286	0.244841	0.481961
-285	0.234215	0.483131
-284	0.224176	0.484364
-283	0.214742	0.485659
-282	0.205881	0.48702
-281	0.197568	0.488446
-280	0.18982	0.489941
-279	0.182612	0.491508
-278	0.175883	0.493148
-277	0.169647	0.494863
-276	0.163893	0.496654
-275	0.158539	0.498522
-274	0.15354	0.500468
-273	0.148884	0.502491
-272	0.144531	0.504591
-271	0.140469	0.506772
-270	0.136721	0.509033
-269	0.133254	0.511376
-268	0.130085	0.513802
-267	0.127182	0.516309
-266	0.124542	0.518897
-265	0.122161	0.521564
-264	0.119961	0.524309
-263	0.117965	0.527129
-262	0.116174	0.530022
-261	0.11453	0.532988
-260	0.113002	0.536025
-259	0.111644	0.539135
-258	0.110479	0.542319
-257	0.10952	0.545575
-256	0.10881	0.548903
-255	0.108349	0.552299
-254	0.10812	0.555763
-253	0.108123	0.559292
-252	0.108327	0.562883
-251	0.108692	0.566535
-250	0.109214	0.570249
-249	0.109885	0.574023
-248	0.110716	0.577858
-247	0.111661	0.581752
-246	0.112732	0.585704
-245	0.113952	0.589711
-244	0.115336	0.593768
-243	0.116848	0.597869
-242	0.118458	0.602011
-241	0.120162	0.606189
-240	0.1219	0.610397
-239	0.123666	0.614631
-238	0.125427	0.618882
-237	0.127164	0.623124
-236	0.128878	0.627331
-235	0.130598	0.631469
-234	0.132328	0.635504
-233	0.134059	0.639403
-232	0.135805	0.643132
-231	0.137582	0.64666
-230	0.139333	0.649953
-229	0.141057	0.652981
-228	0.142754	0.655714
-227	0.144406	0.658122
-226	0.146052	0.660175
-225	0.14767	0.661844
-224	0.149293	0.663102
-223	0.150939	0.663924
-222	0.152627	0.66429
-221	0.154381	0.664216
-220	0.156214	0.66372
-219	0.158119	0.662831
-218	0.160114	0.661578
-217	0.162213	0.659991
-216	0.164415	0.658098
-215	0.166715	0.655929
-214	0.169184	0.653512
-213	0.171845	0.650876
-212	0.174717	0.64805
-211	0.177865	0.645062
-210	0.181278	0.641941
-209	0.184994	0.638716
-208	0.189036	0.635413
-207	0.193378	0.632059
-206	0.198042	0.628677
-205	0.203059	0.625273
-204	0.208439	0.621852
-203	0.214204	0.618413
-202	0.220358	0.614956
-201	0.2269	0.61148
-200	0.233866	0.607986
-199	0.241288	0.604473
-198	0.249142	0.60094
-197	0.25742	0.597386
-196	0.266151	0.593812
-195	0.275311	0.590217
-194	0.284929	0.5866
-193	0.295041	0.582961
-192	0.305639	0.579298
-191	0.31677	0.575613
-190	0.328482	0.571904
-189	0.34077	0.568173
-188	0.353677	0.564418
-187	0.367253	0.56064
-186	0.381505	0.55684
-185	0.396478	0.553015
-184	0.412197	0.549166
-183	0.42868	0.545293
-182	0.445957	0.541396
-181	0.464054	0.537473
-180	0.482936	0.533525
-179	0.502638	0.529553
-178	0.52316	0.525555
-177	0.544425	0.521533
-176	0.566428	0.517484
-175	0.589119	0.51341
-174	0.612352	0.509309
-173	0.63606	0.50518
-172	0.660154	0.501022
-171	0.68447	0.496834
-170	0.708898	0.492616
-169	0.733313	0.488366
-168	0.7575	0.484084
-167	0.781311	0.47977
-166	0.80461	0.475423
-165	0.827235	0.471043
-164	0.849052	0.46663
-163	0.869882	0.46218
-162	0.889555	0.457695
-161	0.90796	0.453171
-160	0.924934	0.448609
-159	0.940342	0.444006
-158	0.954141	0.439363
-157	0.966211	0.434679
-156	0.976461	0.429953
-155	0.984886	0.425185
-154	0.991456	0.420374
-153	0.996115	0.41552
-152	0.998963	0.41062
-151	1	0.405675
-150	0.99921	0.400684
-149	0.996662	0.395646
-148	0.992386	0.390561
-147	0.986412	0.38543
-146	0.978785	0.380252
-145	0.969549	0.37503
-144	0.958801	0.369761
-143	0.946648	0.364446
-142	0.933155	0.359085
-141	0.918447	0.353675
-140	0.902616	0.348219
-139	0.885731	0.342715
-138	0.867892	0.337163
-137	0.849217	0.331563
-136	0.829738	0.325915
-135	0.809572	0.320217
-134	0.788825	0.314469
-133	0.767522	0.30867
-132	0.745787	0.302816
-131	0.723729	0.296907
-130	0.701462	0.290941
-129	0.679105	0.284917
-128	0.656723	0.278835
-127	0.634373	0.272694
-126	0.612165	0.266496
-125	0.590144	0.26024
-124	0.568333	0.253926
-123	0.546775	0.247552
-122	0.525503	0.241118
-121	0.504544	0.234625
-120	0.483917	0.228072
-119	0.463609	0.221462
-118	0.443627	0.214795
-117	0.424005	0.208072
-116	0.404697	0.201298
-115	0.385731	0.194474
-114	0.367095	0.187602
-113	0.348759	0.180681
-112	0.330741	0.173712
-111	0.313054	0.166694
-110	0.295634	0.159628
-109	0.278506	0.152515
-108	0.261707	0.145356
-107	0.245234	0.138154
-106	0.229068	0.13091
-105	0.21322	0.123626
-104	0.197696	0.116305
-103	0.182471	0.108946
-102	0.167585	0.10155
-101	0.153114	0.0941171
-100	0.139084	0.0866484
-99	0.125575	0.0791448
-98	0.112651	0.0716088
-97	0.100359	0.0640451
-96	0.0887951	0.0564579
-95	0.077919	0.0488517
-94	0.0677105	0.0412311
-93	0.0581455	0.0336002
-92	0.0491692	0.0259645
-91	0.040788	0.0183327
-90	0.0330394	0.0107292
-89	0.0260021	0.00318042
-88	0.0197551	0
-87	0.0144081	0.00122084
-86	0.0099548	0.00687549
-85	0.00634712	0.016996
-84	0.00365797	0.031614
-83	0.00173326	0.0507607
-82	0.000500093	0.0744656
-81	0	0.102757
-80	1.61469e-05	0.135663
-79	0.000622348	0.173213
-78	0.00193486	0.215433
-77	0.00388449	0.262349
-76	0.00657825	0.313985
-75	0.0101043	0.370356
-74	0.0144349	0.431447
-73	0.0194773	0.497238
-72	0.0251947	0.559134
-71	0.0315234	0.617105
-70	0.0384158	0.67112
-69	0.0458558	0.72115
-68	0.0537189	0.767164
-67	0.0620563	0.809131
-66	0.0708508	0.847023
-65	0.0799065	0.88081
-64	0.0893017	0.910462
-63	0.0989035	0.93595
-62	0.108534	0.957246
-61	0.118272	0.974322
-60	0.12797	0.987151
-59	0.137425	0.99571
-58	0.146586	0.999992
-57	0.155357	0.999992
-56	0.163604	0.999992
-55	0.171228	0.999992
-54	0.178183	0.999992
-53	0.184353	0.999992
-52	0.189709	0.999993
-51	0.194139	0.999993
-50	0.197587	0.999993
-49	0.200161	0.999994
-48	0.201885	0.999994
-47	0.202846	0.999994
-46	0.203164	0.999995
-45	0.20284	0.999995
-44	0.201922	0.999996
-43	0.200492	0.999996
-42	0.198566	0.999996
-41	0.196194	0.999997
-40	0.193493	0.999997
-39	0.190569	0.999998
-38	0.187526	0.999998
-37	0.184512	0.999998
-36	0.181625	0.999999
-35	0.179013	0.999999
-34	0.176764	0.999999
-33	0.174821	1
-32	0.173146	1
-31	0.171688	1
-30	0.170382	1
-29	0.169184	1
-28	0.168146	1
-27	0.167316	1
-26	0.166732	1
-25	0.166468	1
-24	0.166492	1
-23	0.166738	1
-22	0.167147	0.999999
-21	0.167642	0.999999
-20	0.168171	0.999999
-19	0.168676	0.999999
-18	0.169164	0.999999
-17	0.169705	0.999999
-16	0.170349	0.999998
-15	0.171148	0.999998
-14	0.17214	0.999998
-13	0.173348	0.999998
-12	0.174726	0.999998
-11	0.176234	0.999998
-10	0.177835	0.999997
-9	0.179453	0.999997
-8	0.181099	0.999997
-7	0.182786	0.999997
-6	0.184501	0.999997
-5	0.186238	0.999997
-4	0.188	0.999997
-3	0.189753	0.999997
-2	0.191422	0.999997
-1	0.192954	0.999997
0	0.194318	0.999997
1	0.195465	0.999997
2	0.19642	0.999997
3	0.197187	0.999997
4	0.197757	0.999997
5	0.198124	0.999997
6	0.198285	0.999997
7	0.198225	0.999997
8	0.197886	0.999997
9	0.197284	0.999997
10	0.196452	0.999997
11	0.195437	0.999998
12	0.194299	0.999998
13	0.193135	0.999998
14	0.192038	0.999998
15	0.191057	0.999998
16	0.190169	0.999998
17	0.189382	0.999999
18	0.188612	0.999999
19	0.187812	0.999999
20	0.187014	0.999999
21	0.186244	0.999999
22	0.185558	0.999999
23	0.185076	1
24	0.184915	1
25	0.185082	1
26	0.185579	1
27	0.186389	1
28	0.187411	1
29	0.18853	1
30	0.189681	1
31	0.190864	1
32	0.192158	1
33	0.193644	1
34	0.195399	0.999999
35	0.197503	0.999999
36	0.199905	0.999999
37	0.202545	0.999998
38	0.205332	0.999998
39	0.208101	0.999998
40	0.210714	0.999997
41	0.213111	0.999997
42	0.215191	0.999996
43	0.216872	0.999996
44	0.218183	0.999996
45	0.219177	0.999995
46	0.219767	0.999995
47	0.21993	0.999994
48	0.219626	0.999994
49	0.218649	0.999994
50	0.216954	0.999993
51	0.214399	0.999993
52	0.210916	0.999993
53	0.206574	0.999992
54	0.201358	0.999992
55	0.195355	0.999992
56	0.188623	0.999992
57	0.181224	0.999992
58	0.173293	0.999992
59	0.164927	0.99571
60	0.156156	0.987151
61	0.147014	0.974322
62	0.137717	0.957246
63	0.128265	0.93595
64	0.118598	0.910462
65	0.109023	0.88081
66	0.0995056	0.847023
67	0.0901275	0.809131
68	0.0811276	0.767164
69	0.0724023	0.72115
70	0.0640765	0.67112
71	0.056236	0.617105
72	0.0489371	0.559134
73	0.0422634	0.497238
74	0.0362706	0.431447
75	0.0310856	0.370356
76	0.0267688	0.313985
77	0.0233138	0.262349
78	0.0206385	0.215433
79	0.0187719	0.173213
80	0.017823	0.135663
81	0.0175988	0.102757
82	0.0182723	0.0744656
83	0.0199991	0.0507607
84	0.0226703	0.031614
85	0.0265225	0.016996
86	0.0315714	0.00687549
87	0.0377381	0.00122084
88	0.045078	0
89	0.053503	0.00318042
90	0.0628908	0.0107292
91	0.0730675	0.0183327
92	0.0839985	0.0259645
93	0.0956921	0.0336002
94	0.108132	0.0412311
95	0.12134	0.0488517
96	0.135265	0.0564579
97	0.149948	0.0640451
98	0.165262	0.0716088
99	0.181065	0.0791448
100	0.197346	0.0866484
101	0.213951	0.0941171
102	0.230811	0.10155
103	0.247934	0.108946
104	0.265195	0.116305
105	0.282608	0.123626
106	0.300232	0.13091
107	0.318093	0.138154
108	0.33618	0.145356
109	0.354495	0.152515
110	0.373032	0.159628
111	0.391751	0.166694
112	0.410664	0.173712
113	0.429768	0.180681
114	0.449071	0.187602
115	0.468567	0.194474
116	0.48825	0.201298
117	0.508152	0.208072
118	0.528269	0.214795
119	0.548596	0.221462
120	0.56917	0.228072
121	0.589958	0.234625
122	0.610891	0.241118
123	0.631974	0.247552
124	0.653144	0.253926
125	0.674318	0.26024
126	0.695458	0.266496
127	0.716493	0.272694
128	0.737329	0.278835
129	0.757898	0.284917
130	0.778143	0.290941
131	0.797997	0.296907
132	0.817335	0.302816
133	0.836028	0.30867
134	0.85402	0.314469
135	0.871173	0.320217
136	0.887379	0.325915
137	0.90255	0.331563
138	0.916601	0.337163
139	0.929417	0.342715
140	0.940941	0.348219
141	0.951092	0.353675
142	0.959766	0.359085
143	0.966915	0.364446
144	0.972493	0.369761
145	0.976443	0.37503
146	0.978698	0.380252
147	0.979232	0.38543
148	0.978086	0.390561
149	0.97526	0.395645
150	0.970706	0.400683
151	0.964504	0.405675
152	0.956671	0.41062
153	0.947206	0.415519
154	0.936171	0.420374
155	0.923617	0.425185
156	0.909588	0.429953
157	0.894178	0.434679
158	0.877492	0.439363
159	0.859609	0.444006
160	0.840658	0.448609
161	0.820761	0.453171
162	0.800056	0.457695
163	0.778665	0.46218
164	0.756649	0.466629
165	0.734123	0.471043
166	0.711221	0.475423
167	0.688003	0.47977
168	0.664574	0.484084
169	0.641079	0.488365
170	0.617597	0.492615
171	0.594237	0.496834
172	0.571126	0.501022
173	0.548361	0.50518
174	0.526025	0.509309
175	0.504208	0.51341
176	0.482948	0.517484
177	0.462287	0.521532
178	0.442247	0.525555
179	0.42285	0.529553
180	0.404146	0.533525
181	0.386157	0.537473
182	0.368892	0.541395
183	0.352405	0.545293
184	0.336749	0.549166
185	0.321912	0.553015
186	0.307905	0.55684
187	0.294737	0.56064
188	0.282332	0.564418
189	0.270639	0.568173
190	0.259646	0.571904
191	0.249312	0.575613
192	0.239605	0.579298
193	0.230488	0.582961
194	0.221953	0.5866
195	0.213966	0.590217
196	0.206489	0.593812
197	0.199504	0.597386
198	0.192977	0.600939
199	0.186854	0.604472
200	0.181058	0.607986
201	0.175582	0.61148
202	0.170396	0.614956
203	0.165453	0.618413
204	0.160792	0.621852
205	0.156427	0.625273
206	0.152315	0.628677
207	0.148478	0.632059
208	0.144929	0.635413
209	0.141669	0.638715
210	0.138674	0.641941
211	0.13596	0.645062
212	0.133543	0.64805
213	0.131391	0.650876
214	0.129522	0.653512
215	0.127928	0.655929
216	0.126605	0.658098
217	0.125537	0.659991
218	0.124721	0.661578
219	0.124174	0.662831
220	0.123849	0.66372
221	0.123698	0.664216
222	0.123729	0.66429
223	0.123891	0.663923
224	0.124109	0.663102
225	0.12436	0.661844
226	0.124641	0.660175
227	0.124907	0.658122
228	0.125124	0.655714
229	0.125307	0.65298
230	0.12541	0.649953
231	0.125404	0.64666
232	0.125294	0.643132
233	0.125054	0.639403
234	0.124689	0.635504
235	0.124171	0.631468
236	0.123516	0.62733
237	0.122742	0.623124
238	0.121836	0.618882
239	0.120819	0.614631
240	0.11975	0.610397
241	0.118638	0.606188
242	0.117472	0.602011
243	0.116302	0.597869
244	0.115168	0.593767
245	0.114045	0.589711
246	0.112975	0.585704
247	0.112008	0.581752
248	0.111158	0.577858
249	0.110446	0.574023
250	0.109868	0.570248
251	0.109475	0.566535
252	0.109279	0.562882
253	0.10929	0.559291
254	0.109547	0.555763
255	0.110056	0.552299
256	0.110831	0.548902
257	0.111901	0.545575
258	0.113289	0.542318
259	0.114961	0.539135
260	0.116914	0.536025
261	0.119197	0.532987
262	0.121799	0.530022
263	0.124705	0.527129
264	0.127968	0.524309
265	0.131608	0.521564
266	0.135643	0.518897
267	0.140023	0.516309
268	0.144774	0.513802
269	0.149911	0.511376
270	0.155419	0.509033
271	0.161302	0.506772
272	0.167552	0.504591
273	0.174156	0.50249
274	0.181135	0.500468
275	0.188533	0.498522
276	0.196343	0.496654
277	0.204555	0.494862
278	0.213238	0.493148
279	0.222399	0.491508
280	0.231996	0.489941
281	0.24205	0.488446
282	0.252575	0.48702
283	0.263587	0.485659
284	0.275058	0.484363
285	0.286986	0.483131
286	0.299409	0.48196
287	0.312326	0.480851
288	0.325746	0.479803
289	0.339686	0.478815
290	0.354155	0.477888
291	0.369138	0.47702
292	0.384672	0.47621
293	0.400761	0.475456
294	0.417313	0.474757
295	0.434328	0.474114
296	0.451792	0.473525
297	0.46962	0.472991
298	0.487738	0.47251
299	0.506151	0.472083
300	0.524813	0.471706
301	0.543689	0.471381
302	0.562707	0.471103
303	0.581834	0.470873
304	0.600998	0.470687
305	0.62013	0.470545
306	0.639113	0.470444
307	0.657842	0.470383
308	0.676193	0.470361
309	0.694059	0.470377
310	0.711376	0.470429
311	0.728008	0.470515
312	0.743847	0.470634
313	0.758886	0.470782
314	0.773071	0.470959
315	0.786289	0.471163
316	0.798517	0.471395
317	0.809701	0.471651
318	0.819764	0.471932
319	0.828633	0.472237
320	0.83624	0.472563
321	0.842524	0.472911
322	0.847466	0.473278
323	0.851068	0.473664
324	0.85332	0.474067
325	0.854228	0.474486
326	0.853839	0.47492
327	0.852207	0.475368
328	0.849361	0.475832
329	0.845264	0.476308
330	0.839998	0.476799
331	0.833606	0.477302
332	0.826086	0.477818
333	0.81747	0.478346
334	0.80783	0.478886
335	0.797193	0.479437
336	0.785635	0.479999
337	0.773224	0.480573
338	0.760044	0.481157
339	0.74615	0.481753
340	0.73162	0.482361
341	0.7165	0.482979
342	0.700805	0.48361
343	0.684618	0.484251
344	0.668025	0.484903
345	0.651105	0.485566
346	0.633852	0.486239
347	0.616347	0.486921
348	0.598671	0.487613
349	0.580842	0.488314
350	0.562898	0.489023
351	0.544911	0.489742
352	0.526952	0.490469
353	0.509093	0.491205
354	0.491379	0.491949
355	0.473849	0.492701
356	0.456564	0.493461
357	0.439581	0.494228
358	0.422947	0.495002
359	0.406669	0.495783
360	0.390808	0.496571
361	0.375412	0.497365
362	0.360524	0.498164
363	0.346163	0.498967
364	0.332345	0.499775
365	0.319138	0.500585
366	0.30656	0.501397
367	0.294647	0.502209
368	0.283382	0.50302
369	0.272772	0.503829
370	0.262787	0.504633
371	0.253443	0.505433
372	0.244677	0.506225
373	0.236476	0.507008
374	0.228866	0.50778
375	0.221817	0.508539
376	0.215245	0.509284
377	0.209123	0.510014
378	0.203446	0.510727
379	0.19816	0.511422
380	0.193227	0.512098
381	0.188594	0.512755
382	0.184223	0.513391
383	0.180067	0.514006
384	0.176111	0.514599
385	0.172314	0.51517
386	0.168668	0.515716
387	0.165149	0.516239
388	0.161783	0.516737
389	0.158577	0.517212
390	0.155471	0.517664
391	0.152499	0.518092
392	0.149682	0.518496
393	0.147004	0.518876
394	0.14445	0.519232
395	0.142054	0.519563
396	0.139841	0.519869
397	0.13782	0.520151
398	0.136019	0.520407
399	0.13444	0.520638

## Sheet: Sheet5
binding_sites	CTCF_K562_binding_profile	nucleosome occupancy level
-399	0.207416	0.147933
-398	0.208874	0.147961
-397	0.210231	0.147988
-396	0.211517	0.148014
-395	0.212739	0.148038
-394	0.213943	0.148061
-393	0.215177	0.148082
-392	0.216447	0.148102
-391	0.217816	0.148121
-390	0.21931	0.148138
-389	0.22098	0.148153
-388	0.222881	0.148166
-387	0.224989	0.148178
-386	0.227317	0.148189
-385	0.22991	0.148197
-384	0.232707	0.148203
-383	0.235703	0.148207
-382	0.238923	0.148209
-381	0.242338	0.148209
-380	0.245979	0.148208
-379	0.249859	0.148205
-378	0.253944	0.148202
-377	0.258214	0.148198
-376	0.2627	0.148193
-375	0.267389	0.148188
-374	0.272283	0.148182
-373	0.277356	0.148176
-372	0.282572	0.148169
-371	0.287949	0.148162
-370	0.293474	0.148155
-369	0.29917	0.148148
-368	0.305074	0.148141
-367	0.311199	0.148136
-366	0.317552	0.148131
-365	0.324233	0.148127
-364	0.331206	0.148122
-363	0.33847	0.148118
-362	0.346072	0.148114
-361	0.353976	0.148109
-360	0.362112	0.148105
-359	0.370481	0.1481
-358	0.379048	0.148096
-357	0.387849	0.148092
-356	0.396851	0.148088
-355	0.406038	0.148084
-354	0.415508	0.148081
-353	0.42523	0.148078
-352	0.435199	0.148076
-351	0.445484	0.148074
-350	0.456036	0.148073
-349	0.466798	0.148073
-348	0.477786	0.148074
-347	0.488921	0.148077
-346	0.500151	0.148081
-345	0.511438	0.148087
-344	0.522804	0.148095
-343	0.534246	0.148104
-342	0.545823	0.148115
-341	0.557529	0.148129
-340	0.569426	0.148144
-339	0.581532	0.148162
-338	0.593677	0.148182
-337	0.605869	0.148205
-336	0.618091	0.148231
-335	0.630127	0.148258
-334	0.641951	0.148288
-333	0.653457	0.148319
-332	0.664524	0.148354
-331	0.675134	0.148391
-330	0.685239	0.14843
-329	0.694799	0.148472
-328	0.703822	0.148517
-327	0.712221	0.148564
-326	0.719875	0.148613
-325	0.726655	0.148665
-324	0.732439	0.148718
-323	0.737091	0.148774
-322	0.740581	0.148831
-321	0.742796	0.148889
-320	0.743672	0.148949
-319	0.743278	0.14901
-318	0.741612	0.149073
-317	0.738701	0.149137
-316	0.734655	0.149202
-315	0.729514	0.149268
-314	0.7233	0.149334
-313	0.716086	0.149401
-312	0.707826	0.149469
-311	0.69855	0.149538
-310	0.688353	0.149607
-309	0.677303	0.149678
-308	0.665456	0.14975
-307	0.652993	0.149824
-306	0.640069	0.1499
-305	0.626799	0.149977
-304	0.613242	0.150057
-303	0.59952	0.150138
-302	0.585677	0.150221
-301	0.571807	0.150306
-300	0.5579	0.150395
-299	0.543979	0.150486
-298	0.530088	0.150579
-297	0.516245	0.150676
-296	0.50251	0.150776
-295	0.488979	0.150878
-294	0.475655	0.150984
-293	0.462598	0.151092
-292	0.44988	0.151203
-291	0.437427	0.151318
-290	0.425215	0.151435
-289	0.413219	0.151556
-288	0.401457	0.15168
-287	0.389897	0.151809
-286	0.378515	0.151941
-285	0.367278	0.152078
-284	0.356178	0.152218
-283	0.345244	0.152364
-282	0.33448	0.152513
-281	0.323955	0.152668
-280	0.313672	0.152827
-279	0.303593	0.152991
-278	0.293694	0.15316
-277	0.284016	0.153334
-276	0.274519	0.153514
-275	0.265254	0.153699
-274	0.256235	0.153888
-273	0.247519	0.154084
-272	0.239166	0.154284
-271	0.231169	0.15449
-270	0.223628	0.1547
-269	0.216567	0.154915
-268	0.210021	0.155136
-267	0.203994	0.155361
-266	0.198498	0.155592
-265	0.193475	0.155828
-264	0.188925	0.156069
-263	0.184863	0.156315
-262	0.181309	0.156566
-261	0.178193	0.156823
-260	0.175531	0.157084
-259	0.173286	0.157352
-258	0.17141	0.157625
-257	0.169862	0.157904
-256	0.168568	0.15819
-255	0.167555	0.158482
-254	0.166732	0.158781
-253	0.166053	0.159086
-252	0.165491	0.159399
-251	0.165001	0.159719
-250	0.16458	0.160046
-249	0.164194	0.160382
-248	0.163829	0.160726
-247	0.163474	0.161081
-246	0.163117	0.161445
-245	0.162781	0.161819
-244	0.162422	0.162204
-243	0.162055	0.1626
-242	0.161707	0.163007
-241	0.161427	0.163425
-240	0.161221	0.163854
-239	0.161022	0.164295
-238	0.160877	0.164748
-237	0.1608	0.165206
-236	0.160779	0.165664
-235	0.160827	0.166114
-234	0.16092	0.166549
-233	0.161107	0.166962
-232	0.161412	0.167345
-231	0.161821	0.167692
-230	0.162339	0.167993
-229	0.162981	0.168244
-228	0.163815	0.168434
-227	0.164815	0.168559
-226	0.165952	0.16861
-225	0.167153	0.16858
-224	0.168423	0.168461
-223	0.169796	0.168246
-222	0.171238	0.167927
-221	0.17278	0.167509
-220	0.174495	0.166997
-219	0.17639	0.166398
-218	0.178477	0.165718
-217	0.180724	0.164963
-216	0.183099	0.164142
-215	0.185606	0.163258
-214	0.188272	0.16232
-213	0.191054	0.161333
-212	0.193886	0.160305
-211	0.196805	0.159241
-210	0.199874	0.158148
-209	0.203104	0.157034
-208	0.206528	0.155903
-207	0.210142	0.154765
-206	0.213991	0.153625
-205	0.218038	0.152483
-204	0.222223	0.151341
-203	0.226514	0.150198
-202	0.230929	0.149053
-201	0.235464	0.147907
-200	0.240145	0.14676
-199	0.244987	0.145612
-198	0.249983	0.144461
-197	0.255193	0.143309
-196	0.260656	0.142155
-195	0.266362	0.140999
-194	0.272256	0.13984
-193	0.278412	0.138679
-192	0.284873	0.137515
-191	0.29163	0.136348
-190	0.298636	0.135178
-189	0.305938	0.134005
-188	0.313552	0.132828
-187	0.321571	0.131647
-186	0.329982	0.130464
-185	0.338887	0.129277
-184	0.3483	0.128086
-183	0.358201	0.126891
-182	0.368583	0.125693
-181	0.379448	0.124492
-180	0.390849	0.123287
-179	0.402858	0.122078
-178	0.415537	0.120867
-177	0.4289	0.119654
-176	0.442878	0.118437
-175	0.457521	0.117218
-174	0.47286	0.115998
-173	0.488813	0.114776
-172	0.505417	0.113551
-171	0.522665	0.112325
-170	0.540601	0.111097
-169	0.559135	0.109867
-168	0.578285	0.108635
-167	0.598122	0.107402
-166	0.618599	0.106167
-165	0.63971	0.104931
-164	0.6614	0.103692
-163	0.683492	0.102452
-162	0.705868	0.10121
-161	0.728369	0.0999656
-160	0.750826	0.0987184
-159	0.773117	0.0974685
-158	0.795118	0.0962158
-157	0.816822	0.0949602
-156	0.838136	0.0937022
-155	0.858863	0.0924413
-154	0.878834	0.0911774
-153	0.897891	0.0899107
-152	0.915779	0.0886411
-151	0.932274	0.0873687
-150	0.947322	0.0860932
-149	0.960654	0.0848146
-148	0.972095	0.0835329
-147	0.981628	0.0822482
-146	0.989184	0.0809605
-145	0.994699	0.07967
-144	0.998313	0.0783766
-143	1	0.0770801
-142	0.999755	0.0757808
-141	0.997587	0.0744781
-140	0.993398	0.0731718
-139	0.987215	0.0718619
-138	0.979053	0.0705486
-137	0.969001	0.0692316
-136	0.957287	0.0679108
-135	0.944023	0.066586
-134	0.929238	0.0652572
-133	0.913225	0.0639241
-132	0.896088	0.0625869
-131	0.87789	0.0612456
-130	0.858761	0.0598999
-129	0.838854	0.0585498
-128	0.818145	0.0571953
-127	0.796736	0.0558366
-126	0.774795	0.0544734
-125	0.75234	0.0531059
-124	0.729508	0.0517339
-123	0.706467	0.0503572
-122	0.683311	0.0489759
-121	0.660159	0.0475896
-120	0.637023	0.0461983
-119	0.613975	0.0448021
-118	0.591051	0.043401
-117	0.568191	0.0419954
-116	0.545487	0.0405849
-115	0.523036	0.0391694
-114	0.500867	0.0377487
-113	0.479016	0.0363228
-112	0.457584	0.0348917
-111	0.436591	0.0334547
-110	0.415999	0.0320117
-109	0.395903	0.0305626
-108	0.376328	0.0291076
-107	0.357226	0.0276465
-106	0.338652	0.0261793
-105	0.320569	0.0247057
-104	0.302902	0.0232257
-103	0.285626	0.0217387
-102	0.268764	0.0202441
-101	0.25234	0.0187412
-100	0.236361	0.0172299
-99	0.220804	0.0157095
-98	0.20566	0.01418
-97	0.190919	0.012641
-96	0.176578	0.0110922
-95	0.162611	0.00953401
-94	0.149013	0.00796602
-93	0.135712	0.0063884
-92	0.122726	0.00480048
-91	0.110068	0.00320213
-90	0.0977086	0.00159981
-89	0.0857248	0
-88	0.0742514	0.00240146
-87	0.0633735	0.00881135
-86	0.053203	0.0192372
-85	0.0437753	0.0336862
-84	0.0351381	0.0521654
-83	0.0273349	0.0746824
-82	0.0204488	0.101244
-81	0.014515	0.131858
-80	0.00949202	0.166532
-79	0.00548151	0.205271
-78	0.0025644	0.248085
-77	0.00072409	0.294979
-76	0	0.345962
-75	0.000419101	0.401042
-74	0.00197932	0.460212
-73	0.00460804	0.523467
-72	0.00817455	0.582816
-71	0.0125896	0.638254
-70	0.0176666	0.689773
-69	0.0233514	0.737368
-68	0.0295051	0.781032
-67	0.0359618	0.820757
-66	0.0425906	0.856538
-65	0.0492589	0.888368
-64	0.0559272	0.916241
-63	0.0624378	0.940149
-62	0.0686081	0.960086
-61	0.0745108	0.976046
-60	0.0800255	0.988022
-59	0.0850319	0.996006
-58	0.0894988	0.999998
-57	0.0933682	0.999998
-56	0.096692	0.999998
-55	0.0994846	0.999998
-54	0.101825	0.999998
-53	0.103701	0.999999
-52	0.105155	0.999999
-51	0.106298	0.999999
-50	0.10713	0.999999
-49	0.107736	0.999999
-48	0.108163	0.999999
-47	0.108518	0.999999
-46	0.108946	0.999999
-45	0.10936	0.999999
-44	0.109815	0.999999
-43	0.110404	1
-42	0.111114	1
-41	0.111948	1
-40	0.112883	1
-39	0.113917	1
-38	0.115027	1
-37	0.116211	1
-36	0.117475	1
-35	0.118782	1
-34	0.120174	1
-33	0.121624	1
-32	0.123077	1
-31	0.124479	1
-30	0.125701	1
-29	0.126813	1
-28	0.12778	1
-27	0.128573	1
-26	0.129239	1
-25	0.129855	1
-24	0.130436	1
-23	0.130969	0.999999
-22	0.131446	0.999999
-21	0.131888	0.999999
-20	0.13234	0.999999
-19	0.132824	0.999999
-18	0.133343	0.999999
-17	0.133934	0.999999
-16	0.13466	0.999999
-15	0.135521	0.999999
-14	0.136635	0.999999
-13	0.137955	0.999999
-12	0.139476	0.999999
-11	0.141202	0.999999
-10	0.143086	0.999999
-9	0.145092	0.999999
-8	0.1472	0.999999
-7	0.149397	0.999999
-6	0.151675	0.999999
-5	0.154011	0.999999
-4	0.156273	0.999999
-3	0.158468	0.999999
-2	0.160551	0.999999
-1	0.162435	0.999999
0	0.16408	0.999999
1	0.165485	0.999999
2	0.166578	0.999999
3	0.167354	0.999999
4	0.167852	0.999999
5	0.168055	0.999999
6	0.167974	0.999999
7	0.167586	0.999999
8	0.166914	0.999999
9	0.16596	0.999999
10	0.164738	0.999999
11	0.163275	0.999999
12	0.161736	0.999999
13	0.160063	0.999999
14	0.158302	0.999999
15	0.15657	0.999999
16	0.154874	0.999999
17	0.153227	0.999999
18	0.151644	0.999999
19	0.150123	0.999999
20	0.14865	0.999999
21	0.147262	0.999999
22	0.145968	0.999999
23	0.144814	0.999999
24	0.143752	1
25	0.142833	1
26	0.142079	1
27	0.141465	1
28	0.140913	1
29	0.140492	1
30	0.140208	1
31	0.139984	1
32	0.139891	1
33	0.13994	1
34	0.140131	1
35	0.140503	1
36	0.141067	1
37	0.141787	1
38	0.142675	1
39	0.143689	1
40	0.144887	1
41	0.14626	1
42	0.147743	1
43	0.149351	1
44	0.151005	0.999999
45	0.152634	0.999999
46	0.15414	0.999999
47	0.155489	0.999999
48	0.156578	0.999999
49	0.157298	0.999999
50	0.157671	0.999999
51	0.157582	0.999999
52	0.156953	0.999999
53	0.155806	0.999999
54	0.154049	0.999998
55	0.151638	0.999998
56	0.148495	0.999998
57	0.14453	0.999998
58	0.139795	0.999998
59	0.134241	0.996006
60	0.127975	0.988022
61	0.121104	0.976046
62	0.113786	0.960086
63	0.106147	0.940149
64	0.0982087	0.916241
65	0.090198	0.888368
66	0.0821168	0.856538
67	0.0740937	0.820757
68	0.0663113	0.781032
69	0.0587302	0.737368
70	0.0515577	0.689773
71	0.0449517	0.638254
72	0.0390449	0.582816
73	0.033997	0.523467
74	0.0299201	0.460212
75	0.027005	0.401042
76	0.0253266	0.345962
77	0.0248618	0.294979
78	0.0255901	0.248085
79	0.0274594	0.205271
80	0.0305404	0.166532
81	0.0347107	0.131858
82	0.0399889	0.101244
83	0.0464538	0.0746824
84	0.0540142	0.0521654
85	0.0628071	0.0336862
86	0.0727369	0.0192372
87	0.0837289	0.00881135
88	0.0957521	0.00240146
89	0.108694	0
90	0.12246	0.00159981
91	0.13688	0.00320213
92	0.151893	0.00480048
93	0.167503	0.0063884
94	0.183643	0.00796602
95	0.200314	0.00953401
96	0.217468	0.0110922
97	0.235136	0.012641
98	0.253297	0.01418
99	0.271812	0.0157095
100	0.290665	0.0172299
101	0.309784	0.0187412
102	0.32914	0.0202441
103	0.348738	0.0217387
104	0.368558	0.0232257
105	0.388627	0.0247057
106	0.408914	0.0261793
107	0.429506	0.0276465
108	0.450318	0.0291076
109	0.471242	0.0305626
110	0.492323	0.0320117
111	0.513548	0.0334547
112	0.534877	0.0348917
113	0.556267	0.0363228
114	0.577696	0.0377487
115	0.599198	0.0391694
116	0.620732	0.0405849
117	0.642252	0.0419954
118	0.663717	0.043401
119	0.685017	0.0448021
120	0.706142	0.0461983
121	0.727111	0.0475896
122	0.747842	0.0489759
123	0.768216	0.0503572
124	0.788234	0.0517339
125	0.807919	0.0531059
126	0.8271	0.0544734
127	0.845709	0.0558366
128	0.863776	0.0571953
129	0.881164	0.0585498
130	0.897762	0.0598999
131	0.913418	0.0612456
132	0.928045	0.0625869
133	0.941525	0.0639241
134	0.95377	0.0652572
135	0.964781	0.066586
136	0.974327	0.0679108
137	0.982236	0.0692316
138	0.988527	0.0705486
139	0.993091	0.0718619
140	0.995797	0.0731718
141	0.996568	0.0744781
142	0.995467	0.0757808
143	0.992475	0.0770801
144	0.987402	0.0783766
145	0.98036	0.07967
146	0.971466	0.0809605
147	0.960758	0.0822482
148	0.948357	0.0835329
149	0.934367	0.0848146
150	0.918918	0.0860932
151	0.902055	0.0873687
152	0.884002	0.0886411
153	0.864871	0.0899107
154	0.844684	0.0911774
155	0.823656	0.0924413
156	0.802058	0.0937022
157	0.780057	0.0949602
158	0.757743	0.0962158
159	0.735215	0.0974685
160	0.712773	0.0987184
161	0.690446	0.0999655
162	0.668209	0.10121
163	0.646291	0.102452
164	0.624705	0.103692
165	0.603495	0.104931
166	0.582689	0.106167
167	0.562359	0.107402
168	0.542541	0.108635
169	0.523289	0.109867
170	0.504762	0.111097
171	0.486966	0.112325
172	0.469843	0.113551
173	0.453382	0.114775
174	0.437649	0.115998
175	0.422622	0.117218
176	0.408146	0.118437
177	0.39427	0.119653
178	0.381102	0.120867
179	0.368469	0.122078
180	0.356375	0.123286
181	0.344862	0.124491
182	0.333889	0.125693
183	0.323417	0.126891
184	0.313448	0.128085
185	0.303985	0.129276
186	0.294972	0.130463
187	0.286348	0.131647
188	0.278113	0.132827
189	0.270221	0.134004
190	0.2626	0.135178
191	0.25528	0.136348
192	0.24833	0.137515
193	0.241693	0.138679
194	0.235325	0.13984
195	0.229317	0.140998
196	0.223707	0.142155
197	0.218451	0.143309
198	0.213642	0.144461
199	0.20932	0.145611
200	0.205426	0.14676
201	0.201947	0.147907
202	0.198847	0.149053
203	0.196125	0.150197
204	0.193745	0.151341
205	0.191689	0.152483
206	0.18995	0.153624
207	0.188494	0.154764
208	0.187288	0.155903
209	0.186334	0.157033
210	0.185589	0.158148
211	0.185033	0.15924
212	0.184593	0.160304
213	0.184222	0.161333
214	0.183811	0.162319
215	0.183297	0.163258
216	0.182678	0.164141
217	0.181915	0.164963
218	0.18096	0.165717
219	0.179871	0.166397
220	0.178643	0.166996
221	0.177327	0.167508
222	0.1759	0.167926
223	0.174373	0.168246
224	0.172744	0.168461
225	0.171033	0.168579
226	0.169261	0.168609
227	0.167389	0.168558
228	0.165456	0.168434
229	0.163541	0.168243
230	0.161619	0.167993
231	0.159756	0.167691
232	0.157995	0.167345
233	0.156406	0.166962
234	0.155028	0.166549
235	0.153789	0.166114
236	0.152702	0.165663
237	0.151739	0.165206
238	0.150924	0.164748
239	0.150268	0.164295
240	0.149795	0.163854
241	0.14953	0.163425
242	0.149459	0.163007
243	0.149609	0.1626
244	0.149966	0.162204
245	0.150449	0.161819
246	0.151169	0.161444
247	0.152125	0.16108
248	0.153271	0.160726
249	0.154586	0.160381
250	0.156076	0.160046
251	0.157754	0.159718
252	0.159597	0.159399
253	0.161586	0.159086
254	0.163734	0.15878
255	0.16603	0.158482
256	0.168485	0.15819
257	0.171041	0.157904
258	0.173709	0.157625
259	0.176479	0.157351
260	0.179338	0.157084
261	0.182353	0.156822
262	0.185446	0.156566
263	0.188579	0.156315
264	0.191842	0.156069
265	0.195199	0.155828
266	0.198623	0.155592
267	0.202181	0.155361
268	0.205924	0.155135
269	0.209889	0.154915
270	0.214111	0.154699
271	0.218626	0.154489
272	0.223487	0.154284
273	0.228792	0.154083
274	0.234524	0.153888
275	0.240718	0.153698
276	0.24745	0.153513
277	0.254755	0.153334
278	0.262708	0.153159
279	0.271358	0.15299
280	0.280644	0.152826
281	0.290659	0.152667
282	0.301485	0.152513
283	0.313064	0.152363
284	0.32542	0.152218
285	0.338549	0.152077
286	0.35242	0.151941
287	0.367	0.151808
288	0.382158	0.15168
289	0.397812	0.151555
290	0.414016	0.151435
291	0.430678	0.151317
292	0.447668	0.151203
293	0.464935	0.151092
294	0.482394	0.150983
295	0.499942	0.150878
296	0.517511	0.150775
297	0.53496	0.150675
298	0.552153	0.150579
299	0.56905	0.150485
300	0.585505	0.150394
301	0.60146	0.150306
302	0.616867	0.15022
303	0.631633	0.150137
304	0.64581	0.150056
305	0.659287	0.149977
306	0.671933	0.149899
307	0.683828	0.149824
308	0.694969	0.14975
309	0.705194	0.149678
310	0.714437	0.149607
311	0.722704	0.149537
312	0.729999	0.149469
313	0.736319	0.149401
314	0.741713	0.149334
315	0.746193	0.149267
316	0.74979	0.149202
317	0.752475	0.149137
318	0.75427	0.149073
319	0.755274	0.14901
320	0.75538	0.148949
321	0.754631	0.148889
322	0.75305	0.148831
323	0.750475	0.148774
324	0.746967	0.148718
325	0.742655	0.148664
326	0.737581	0.148613
327	0.731767	0.148563
328	0.725273	0.148516
329	0.718171	0.148472
330	0.710412	0.14843
331	0.70199	0.14839
332	0.692959	0.148353
333	0.683373	0.148319
334	0.673143	0.148287
335	0.662221	0.148257
336	0.650785	0.14823
337	0.638897	0.148205
338	0.626631	0.148182
339	0.614197	0.148161
340	0.601599	0.148143
341	0.588908	0.148128
342	0.5762	0.148115
343	0.56351	0.148103
344	0.550844	0.148094
345	0.53818	0.148086
346	0.52559	0.14808
347	0.513152	0.148076
348	0.500873	0.148073
349	0.488817	0.148072
350	0.477103	0.148072
351	0.465752	0.148073
352	0.45465	0.148075
353	0.443911	0.148077
354	0.433537	0.14808
355	0.423381	0.148084
356	0.413441	0.148087
357	0.403659	0.148091
358	0.394028	0.148095
359	0.38456	0.1481
360	0.375239	0.148104
361	0.366091	0.148109
362	0.35713	0.148113
363	0.348314	0.148117
364	0.339694	0.148122
365	0.331221	0.148126
366	0.322888	0.14813
367	0.314714	0.148135
368	0.306784	0.148141
369	0.299024	0.148147
370	0.29147	0.148154
371	0.284242	0.148161
372	0.277349	0.148168
373	0.270816	0.148175
374	0.264608	0.148182
375	0.258704	0.148187
376	0.253116	0.148193
377	0.247824	0.148197
378	0.242832	0.148202
379	0.238199	0.148205
380	0.233898	0.148207
381	0.229943	0.148208
382	0.226377	0.148208
383	0.223196	0.148206
384	0.220383	0.148202
385	0.21785	0.148196
386	0.215582	0.148188
387	0.21354	0.148178
388	0.211698	0.148166
389	0.210065	0.148152
390	0.208683	0.148137
391	0.20754	0.14812
392	0.206644	0.148102
393	0.206057	0.148082
394	0.205739	0.14806
395	0.205594	0.148037
396	0.205571	0.148013
397	0.205669	0.147987
398	0.205795	0.14796
399	0.205947	0.147932

## Sheet: Sheet6
binding_sites	CTCF_HepG2_binding_profile	nucleosome occupancy level
-399	0.106071	0.261451
-398	0.107176	0.261411
-397	0.108444	0.261368
-396	0.109889	0.261321
-395	0.111554	0.26127
-394	0.113366	0.261215
-393	0.115351	0.261157
-392	0.117535	0.261095
-391	0.119867	0.261031
-390	0.122393	0.260963
-389	0.125131	0.260893
-388	0.128034	0.26082
-387	0.131095	0.260743
-386	0.13426	0.260663
-385	0.137575	0.26058
-384	0.140988	0.260492
-383	0.144519	0.2604
-382	0.148123	0.260305
-381	0.151813	0.260207
-380	0.155626	0.260106
-379	0.159484	0.260004
-378	0.163448	0.259899
-377	0.167539	0.259792
-376	0.171737	0.259683
-375	0.176109	0.259573
-374	0.18064	0.259461
-373	0.185336	0.259347
-372	0.190257	0.259233
-371	0.195363	0.259118
-370	0.200761	0.259003
-369	0.206505	0.258889
-368	0.212616	0.258776
-367	0.219161	0.258664
-366	0.226181	0.258554
-365	0.233705	0.258446
-364	0.24171	0.258339
-363	0.250295	0.258235
-362	0.259448	0.258132
-361	0.269097	0.258031
-360	0.279309	0.257934
-359	0.290026	0.257838
-358	0.301226	0.257745
-357	0.312949	0.257655
-356	0.325165	0.257569
-355	0.337985	0.257486
-354	0.351343	0.257406
-353	0.365146	0.257329
-352	0.379454	0.257256
-351	0.394154	0.257186
-350	0.4092	0.25712
-349	0.424553	0.257057
-348	0.440169	0.256999
-347	0.455991	0.256945
-346	0.471968	0.256895
-345	0.488171	0.256848
-344	0.5045	0.256805
-343	0.520909	0.256766
-342	0.53744	0.256731
-341	0.553952	0.256702
-340	0.570401	0.256676
-339	0.586644	0.256655
-338	0.60259	0.256638
-337	0.618254	0.256624
-336	0.633413	0.256615
-335	0.648067	0.256608
-334	0.662175	0.256605
-333	0.67564	0.256604
-332	0.688463	0.256605
-331	0.700525	0.25661
-330	0.711759	0.256617
-329	0.722018	0.256627
-328	0.731237	0.256641
-327	0.739418	0.256657
-326	0.746361	0.256675
-325	0.752069	0.256696
-324	0.756516	0.25672
-323	0.759654	0.256746
-322	0.761504	0.256776
-321	0.761984	0.256809
-320	0.761175	0.256845
-319	0.75902	0.256887
-318	0.75548	0.256933
-317	0.750583	0.256985
-316	0.744262	0.257042
-315	0.736606	0.257104
-314	0.727682	0.257172
-313	0.717559	0.257246
-312	0.706328	0.257326
-311	0.69404	0.257413
-310	0.680844	0.257507
-309	0.666797	0.257608
-308	0.651933	0.257718
-307	0.636377	0.257837
-306	0.620185	0.257965
-305	0.603458	0.258102
-304	0.58626	0.258249
-303	0.568728	0.258406
-302	0.550967	0.258574
-301	0.533087	0.258753
-300	0.515226	0.258945
-299	0.497405	0.259149
-298	0.479692	0.259367
-297	0.462178	0.259598
-296	0.444892	0.259842
-295	0.427814	0.2601
-294	0.410973	0.26037
-293	0.394403	0.260652
-292	0.378161	0.260947
-291	0.362286	0.261254
-290	0.346791	0.261573
-289	0.331707	0.261906
-288	0.31706	0.26225
-287	0.302844	0.262606
-286	0.289073	0.262974
-285	0.275739	0.263352
-284	0.262819	0.263742
-283	0.250372	0.264142
-282	0.238398	0.264553
-281	0.226863	0.264976
-280	0.215786	0.265413
-279	0.205242	0.265862
-278	0.195236	0.266327
-277	0.185784	0.266806
-276	0.176883	0.2673
-275	0.168465	0.26781
-274	0.160568	0.268336
-273	0.153187	0.268876
-272	0.146313	0.269433
-271	0.139979	0.270006
-270	0.134197	0.270596
-269	0.128964	0.271203
-268	0.124257	0.271828
-267	0.120051	0.272469
-266	0.116313	0.273127
-265	0.113031	0.2738
-264	0.110164	0.274487
-263	0.107651	0.275187
-262	0.105493	0.275899
-261	0.103671	0.276623
-260	0.102166	0.277359
-259	0.101031	0.278106
-258	0.100235	0.278866
-257	0.0997763	0.279637
-256	0.0996521	0.280418
-255	0.0997718	0.28121
-254	0.10008	0.28201
-253	0.100529	0.282817
-252	0.101112	0.283632
-251	0.101767	0.284453
-250	0.102442	0.285281
-249	0.103172	0.286117
-248	0.103982	0.28696
-247	0.104867	0.287811
-246	0.105816	0.28867
-245	0.106828	0.289535
-244	0.107884	0.290405
-243	0.108936	0.291278
-242	0.109926	0.292154
-241	0.110828	0.293032
-240	0.111577	0.293912
-239	0.112169	0.294793
-238	0.112619	0.295674
-237	0.112937	0.296547
-236	0.113132	0.2974
-235	0.113258	0.298223
-234	0.113374	0.299003
-233	0.11344	0.299728
-232	0.113425	0.300388
-231	0.113355	0.300971
-230	0.113206	0.301466
-229	0.112939	0.301863
-228	0.112586	0.302153
-227	0.112149	0.302324
-226	0.11167	0.302366
-225	0.11117	0.302269
-224	0.110706	0.302021
-223	0.110363	0.301613
-222	0.110138	0.301034
-221	0.110046	0.300294
-220	0.110116	0.299401
-219	0.110336	0.298367
-218	0.110689	0.297201
-217	0.111191	0.295915
-216	0.111838	0.29452
-215	0.112635	0.293025
-214	0.11359	0.291441
-213	0.114758	0.289779
-212	0.116113	0.288048
-211	0.117654	0.286259
-210	0.119424	0.284423
-209	0.121393	0.282549
-208	0.123577	0.280649
-207	0.125981	0.278732
-206	0.128589	0.276808
-205	0.131424	0.274878
-204	0.134471	0.272942
-203	0.137727	0.271001
-202	0.141248	0.269054
-201	0.145016	0.2671
-200	0.149097	0.26514
-199	0.153502	0.263173
-198	0.158262	0.261201
-197	0.163388	0.259222
-196	0.168914	0.257237
-195	0.174876	0.255244
-194	0.181229	0.253245
-193	0.188036	0.251239
-192	0.19529	0.249227
-191	0.202907	0.247208
-190	0.210968	0.245182
-189	0.219454	0.24315
-188	0.228329	0.241112
-187	0.23767	0.239068
-186	0.247443	0.237019
-185	0.257707	0.234965
-184	0.268469	0.232904
-183	0.279733	0.230839
-182	0.291552	0.228767
-181	0.303922	0.22669
-180	0.316897	0.224606
-179	0.33049	0.222518
-178	0.344767	0.220424
-177	0.359745	0.218326
-176	0.375474	0.216222
-175	0.39205	0.214112
-174	0.409512	0.211997
-173	0.427921	0.209875
-172	0.447374	0.207746
-171	0.467822	0.20561
-170	0.489261	0.203467
-169	0.511671	0.201317
-168	0.534955	0.199159
-167	0.559035	0.196995
-166	0.583771	0.194823
-165	0.609103	0.192645
-164	0.634836	0.19046
-163	0.660862	0.188268
-162	0.687049	0.186066
-161	0.713184	0.183856
-160	0.73908	0.181638
-159	0.764557	0.17941
-158	0.789363	0.177173
-157	0.813254	0.174928
-156	0.836031	0.172673
-155	0.857477	0.170409
-154	0.877382	0.168136
-153	0.895559	0.165852
-152	0.911892	0.163558
-151	0.926293	0.161252
-150	0.938688	0.158936
-149	0.948943	0.156608
-148	0.957104	0.154269
-147	0.963087	0.15192
-146	0.966822	0.149561
-145	0.968357	0.147193
-144	0.967714	0.144814
-143	0.964863	0.142426
-142	0.959829	0.140027
-141	0.952742	0.137618
-140	0.94364	0.135199
-139	0.932617	0.132771
-138	0.919845	0.130333
-137	0.905386	0.127886
-136	0.889342	0.125431
-135	0.871845	0.122966
-134	0.852974	0.120491
-133	0.832905	0.118006
-132	0.811653	0.115511
-131	0.789359	0.113003
-130	0.766211	0.110484
-129	0.742291	0.107952
-128	0.717715	0.105409
-127	0.692666	0.102854
-126	0.667357	0.100288
-125	0.641798	0.0977114
-124	0.616094	0.0951231
-123	0.590427	0.0925231
-122	0.564837	0.0899113
-121	0.539463	0.0872881
-120	0.514461	0.0846534
-119	0.489823	0.0820079
-118	0.465679	0.0793525
-117	0.442063	0.0766882
-116	0.419045	0.074016
-115	0.39669	0.071337
-114	0.374965	0.0686516
-113	0.353932	0.065959
-112	0.33357	0.0632595
-111	0.313845	0.0605528
-110	0.294686	0.0578387
-109	0.276171	0.055118
-108	0.2583	0.0523912
-107	0.240993	0.0496592
-106	0.224258	0.0469226
-105	0.208092	0.0441818
-104	0.192363	0.0414374
-103	0.177078	0.0386891
-102	0.162178	0.0359364
-101	0.147644	0.0331793
-100	0.13352	0.0304178
-99	0.119873	0.0276518
-98	0.106787	0.024882
-97	0.0942749	0.0221105
-96	0.0825205	0.0193379
-95	0.0715233	0.0165653
-94	0.0612545	0.0137936
-93	0.051702	0.0110229
-92	0.0428501	0.00825387
-91	0.0347012	0.0054871
-90	0.0272485	0.00273246
-89	0.0205531	0
-88	0.0147235	0.00134687
-87	0.00985966	0.00678475
-86	0.00599141	0.0163251
-85	0.00314094	0.0299789
-84	0.00129385	0.047757
-83	0.000290479	0.0696702
-82	0	0.0957287
-81	0.000376958	0.125942
-80	0.00110981	0.160321
-79	0.00219079	0.198876
-78	0.00370195	0.241617
-77	0.00550913	0.288554
-76	0.0076977	0.339697
-75	0.0103497	0.395055
-74	0.0134829	0.45462
-73	0.0169864	0.518382
-72	0.0208114	0.578238
-71	0.0248803	0.634176
-70	0.0291244	0.686186
-69	0.0334727	0.734256
-68	0.0378477	0.778376
-67	0.0422669	0.818536
-66	0.0467538	0.854724
-65	0.0512164	0.88693
-64	0.0557543	0.915143
-63	0.0603543	0.939353
-62	0.0649276	0.959549
-61	0.0696152	0.975721
-60	0.0742884	0.987858
-59	0.0787919	0.99595
-58	0.0830449	0.999997
-57	0.0869952	0.999997
-56	0.0905563	0.999997
-55	0.0936208	0.999997
-54	0.0962196	0.999997
-53	0.0983294	0.999997
-52	0.0999459	0.999997
-51	0.10104	0.999997
-50	0.101613	0.999997
-49	0.101742	0.999997
-48	0.101489	0.999997
-47	0.100894	0.999997
-46	0.100012	0.999997
-45	0.0988405	0.999998
-44	0.0974214	0.999998
-43	0.0957971	0.999998
-42	0.0939844	0.999998
-41	0.0920253	0.999998
-40	0.089982	0.999998
-39	0.0879664	0.999998
-38	0.085973	0.999999
-37	0.084076	0.999999
-36	0.0823309	0.999999
-35	0.0808109	0.999999
-34	0.0795292	0.999999
-33	0.0784593	0.999999
-32	0.0775513	0.999999
-31	0.0767641	1
-30	0.0760645	1
-29	0.0754137	1
-28	0.0748194	1
-27	0.0743638	1
-26	0.0740833	1
-25	0.0740046	1
-24	0.0741265	1
-23	0.0744048	1
-22	0.0748239	1
-21	0.075335	1
-20	0.0758827	1
-19	0.0764592	1
-18	0.0770524	1
-17	0.077701	1
-16	0.078436	1
-15	0.0792786	1
-14	0.0802266	1
-13	0.0812621	1
-12	0.0823819	0.999999
-11	0.0834728	0.999999
-10	0.0845128	0.999999
-9	0.0855018	0.999999
-8	0.0864131	0.999999
-7	0.0872812	0.999999
-6	0.0881383	0.999999
-5	0.0889897	0.999999
-4	0.0898468	0.999999
-3	0.0906483	0.999999
-2	0.0913845	0.999999
-1	0.0920464	0.999999
0	0.0926185	0.999999
1	0.0931097	0.999999
2	0.0935343	0.999999
3	0.0939112	0.999999
4	0.094215	0.999999
5	0.0945033	0.999999
6	0.0947694	0.999999
7	0.0949634	0.999999
8	0.0950776	0.999999
9	0.0950687	0.999999
10	0.094929	0.999999
11	0.0946796	0.999999
12	0.0943669	0.999999
13	0.0940554	1
14	0.0937993	1
15	0.0936141	1
16	0.0934933	1
17	0.0933924	1
18	0.0932615	1
19	0.0930753	1
20	0.0928502	1
21	0.0926484	1
22	0.0925265	1
23	0.0926008	1
24	0.0929278	1
25	0.0935409	1
26	0.0944057	1
27	0.0955178	1
28	0.0968393	1
29	0.098346	1
30	0.0999914	1
31	0.101785	1
32	0.103765	0.999999
33	0.105996	0.999999
34	0.108576	0.999999
35	0.111569	0.999999
36	0.114974	0.999999
37	0.118653	0.999999
38	0.122515	0.999999
39	0.126462	0.999998
40	0.130414	0.999998
41	0.134319	0.999998
42	0.138105	0.999998
43	0.141707	0.999998
44	0.145062	0.999998
45	0.148131	0.999998
46	0.150847	0.999997
47	0.153146	0.999997
48	0.155014	0.999997
49	0.156302	0.999997
50	0.156908	0.999997
51	0.156725	0.999997
52	0.155674	0.999997
53	0.153815	0.999997
54	0.151116	0.999997
55	0.147526	0.999997
56	0.143086	0.999997
57	0.137826	0.999997
58	0.131872	0.999997
59	0.125293	0.99595
60	0.118202	0.987858
61	0.110715	0.975721
62	0.103006	0.959549
63	0.0951386	0.939353
64	0.0870517	0.915143
65	0.0790037	0.88693
66	0.0710011	0.854724
67	0.0630229	0.818536
68	0.0552842	0.778376
69	0.0477517	0.734256
70	0.0405706	0.686186
71	0.0339051	0.634176
72	0.0277807	0.578238
73	0.0223092	0.518382
74	0.0175751	0.45462
75	0.0137091	0.395055
76	0.0107344	0.339697
77	0.00855805	0.288554
78	0.0071112	0.241617
79	0.00635506	0.198876
80	0.00633511	0.160321
81	0.00688724	0.125942
82	0.00815337	0.0957287
83	0.0103929	0.0696702
84	0.0134884	0.047757
85	0.0176206	0.0299789
86	0.0228082	0.0163251
87	0.0289725	0.00678475
88	0.036199	0.00134687
89	0.044389	0
90	0.0534127	0.00273246
91	0.0631471	0.0054871
92	0.0735954	0.00825387
93	0.0848388	0.0110229
94	0.0968571	0.0137936
95	0.10971	0.0165653
96	0.123455	0.0193379
97	0.138146	0.0221105
98	0.153722	0.024882
99	0.170042	0.0276518
100	0.187135	0.0304178
101	0.204888	0.0331793
102	0.22323	0.0359364
103	0.24219	0.0386891
104	0.261688	0.0414374
105	0.28178	0.0441818
106	0.302552	0.0469226
107	0.323976	0.0496592
108	0.345995	0.0523912
109	0.368571	0.055118
110	0.391742	0.0578387
111	0.415476	0.0605528
112	0.439695	0.0632595
113	0.464379	0.065959
114	0.489486	0.0686516
115	0.514993	0.071337
116	0.540843	0.074016
117	0.566969	0.0766882
118	0.593346	0.0793525
119	0.61988	0.0820079
120	0.646456	0.0846534
121	0.673001	0.0872881
122	0.699341	0.0899113
123	0.725422	0.0925231
124	0.751149	0.0951231
125	0.77631	0.0977114
126	0.800767	0.100288
127	0.824398	0.102854
128	0.84716	0.105409
129	0.868868	0.107952
130	0.889352	0.110484
131	0.908476	0.113003
132	0.926099	0.115511
133	0.942113	0.118006
134	0.956331	0.120491
135	0.968656	0.122966
136	0.979089	0.125431
137	0.987457	0.127886
138	0.993756	0.130333
139	0.997961	0.132771
140	0.999997	0.135199
141	1	0.137618
142	0.997921	0.140027
143	0.993719	0.142426
144	0.98737	0.144814
145	0.978987	0.147193
146	0.968687	0.149561
147	0.956453	0.15192
148	0.94241	0.154269
149	0.926653	0.156608
150	0.909373	0.158936
151	0.89068	0.161252
152	0.870644	0.163558
153	0.849442	0.165852
154	0.827142	0.168136
155	0.803805	0.170409
156	0.779641	0.172673
157	0.754724	0.174928
158	0.729221	0.177173
159	0.703354	0.17941
160	0.67723	0.181638
161	0.650962	0.183856
162	0.624665	0.186066
163	0.598584	0.188268
164	0.572759	0.19046
165	0.547282	0.192645
166	0.522244	0.194823
167	0.497764	0.196995
168	0.473959	0.199159
169	0.4509	0.201317
170	0.428736	0.203467
171	0.407556	0.20561
172	0.387414	0.207746
173	0.368329	0.209875
174	0.350336	0.211997
175	0.333388	0.214112
176	0.317488	0.216222
177	0.302603	0.218326
178	0.288655	0.220424
179	0.275522	0.222518
180	0.263204	0.224606
181	0.251706	0.22669
182	0.240946	0.228767
183	0.230875	0.230839
184	0.221421	0.232904
185	0.212554	0.234965
186	0.204145	0.237019
187	0.196167	0.239068
188	0.188493	0.241112
189	0.181084	0.24315
190	0.173918	0.245182
191	0.16694	0.247208
192	0.160175	0.249227
193	0.153622	0.251239
194	0.147335	0.253245
195	0.141357	0.255244
196	0.135715	0.257237
197	0.130405	0.259222
198	0.125456	0.261201
199	0.120864	0.263173
200	0.116647	0.26514
201	0.112769	0.2671
202	0.109293	0.269054
203	0.106185	0.271001
204	0.103464	0.272942
205	0.101144	0.274878
206	0.0991587	0.276808
207	0.0975788	0.278732
208	0.0963049	0.280649
209	0.0952738	0.282549
210	0.0944756	0.284423
211	0.0938869	0.286259
212	0.0934534	0.288048
213	0.0931507	0.289779
214	0.0929334	0.291441
215	0.0927671	0.293025
216	0.0925875	0.29452
217	0.092409	0.295915
218	0.0921761	0.297201
219	0.091869	0.298367
220	0.0915054	0.299401
221	0.0910552	0.300294
222	0.0905707	0.301034
223	0.0899842	0.301613
224	0.0893578	0.302021
225	0.0887314	0.302269
226	0.0880351	0.302366
227	0.0873245	0.302324
228	0.086626	0.302153
229	0.0858954	0.301863
230	0.0851636	0.301466
231	0.0844352	0.300971
232	0.0836979	0.300388
233	0.0829662	0.299728
234	0.08224	0.299003
235	0.0815559	0.298223
236	0.0809062	0.2974
237	0.0803042	0.296547
238	0.0797077	0.295674
239	0.0791556	0.294793
240	0.0786389	0.293912
241	0.0781655	0.293032
242	0.0777763	0.292154
243	0.0774182	0.291278
244	0.0770646	0.290405
245	0.0767907	0.289535
246	0.0765801	0.28867
247	0.0764393	0.287811
248	0.0764703	0.28696
249	0.0766355	0.286117
250	0.0769548	0.285281
251	0.0774471	0.284453
252	0.0780812	0.283632
253	0.0788972	0.282817
254	0.0799106	0.28201
255	0.0810969	0.28121
256	0.0824872	0.280418
257	0.0841225	0.279637
258	0.0860339	0.278866
259	0.0882436	0.278106
260	0.0908047	0.277359
261	0.0936917	0.276623
262	0.0968837	0.275899
263	0.10045	0.275187
264	0.104319	0.274487
265	0.108497	0.2738
266	0.113063	0.273127
267	0.117999	0.272469
268	0.123392	0.271828
269	0.129251	0.271203
270	0.135621	0.270596
271	0.142591	0.270006
272	0.150169	0.269433
273	0.15836	0.268876
274	0.167172	0.268336
275	0.17661	0.26781
276	0.186623	0.2673
277	0.197233	0.266806
278	0.208533	0.266327
279	0.220446	0.265862
280	0.233056	0.265413
281	0.246449	0.264976
282	0.26051	0.264553
283	0.275259	0.264142
284	0.290654	0.263742
285	0.306667	0.263352
286	0.323293	0.262974
287	0.340455	0.262606
288	0.358124	0.26225
289	0.376231	0.261905
290	0.394749	0.261573
291	0.41366	0.261254
292	0.43297	0.260947
293	0.452643	0.260652
294	0.472563	0.260369
295	0.49273	0.260099
296	0.513012	0.259842
297	0.53326	0.259598
298	0.553505	0.259367
299	0.573663	0.259149
300	0.593678	0.258944
301	0.613448	0.258753
302	0.63283	0.258573
303	0.651762	0.258406
304	0.670084	0.258249
305	0.687642	0.258102
306	0.70432	0.257965
307	0.719961	0.257837
308	0.734531	0.257718
309	0.747903	0.257608
310	0.76002	0.257506
311	0.770771	0.257412
312	0.780137	0.257326
313	0.788112	0.257246
314	0.794581	0.257172
315	0.799443	0.257104
316	0.802662	0.257042
317	0.804229	0.256985
318	0.804166	0.256933
319	0.80241	0.256887
320	0.79909	0.256845
321	0.79439	0.256808
322	0.788345	0.256775
323	0.781086	0.256746
324	0.772646	0.25672
325	0.763079	0.256696
326	0.752464	0.256675
327	0.740836	0.256657
328	0.72824	0.256641
329	0.714697	0.256627
330	0.700316	0.256617
331	0.685231	0.25661
332	0.669479	0.256605
333	0.653188	0.256604
334	0.636517	0.256605
335	0.619573	0.256608
336	0.602358	0.256614
337	0.584869	0.256624
338	0.567207	0.256637
339	0.549417	0.256655
340	0.531472	0.256676
341	0.513498	0.256701
342	0.495556	0.256731
343	0.477767	0.256765
344	0.460227	0.256804
345	0.443061	0.256847
346	0.426341	0.256894
347	0.410131	0.256945
348	0.394523	0.256999
349	0.379482	0.257057
350	0.364918	0.257119
351	0.350915	0.257185
352	0.33748	0.257255
353	0.324616	0.257329
354	0.312298	0.257406
355	0.300537	0.257485
356	0.289379	0.257569
357	0.278793	0.257655
358	0.268754	0.257745
359	0.259255	0.257838
360	0.250233	0.257933
361	0.241612	0.258031
362	0.233321	0.258132
363	0.225318	0.258234
364	0.217557	0.258339
365	0.21005	0.258446
366	0.202841	0.258554
367	0.195854	0.258664
368	0.189168	0.258776
369	0.182831	0.258889
370	0.17684	0.259003
371	0.1712	0.259118
372	0.165929	0.259233
373	0.161004	0.259347
374	0.156392	0.259461
375	0.15209	0.259573
376	0.148088	0.259683
377	0.144414	0.259792
378	0.141126	0.259899
379	0.138264	0.260004
380	0.135815	0.260106
381	0.133765	0.260207
382	0.132103	0.260305
383	0.130848	0.2604
384	0.129911	0.260492
385	0.129217	0.26058
386	0.128772	0.260663
387	0.128515	0.260743
388	0.128395	0.26082
389	0.128415	0.260893
390	0.128608	0.260963
391	0.128931	0.261031
392	0.129401	0.261095
393	0.130001	0.261157
394	0.13065	0.261215
395	0.131273	0.26127
396	0.131869	0.261321
397	0.132424	0.261368
398	0.132894	0.261411
399	0.133248	0.26145

## Sheet: Sheet7
binding_sites	CTCF_H1_binding_profile	nucleosome occupancy level
-399	0.248961	0.63633
-398	0.255973	0.636175
-397	0.263224	0.635976
-396	0.270718	0.63573
-395	0.278463	0.635438
-394	0.286458	0.635098
-393	0.294681	0.63471
-392	0.303127	0.634273
-391	0.311794	0.633787
-390	0.320688	0.633252
-389	0.32983	0.632669
-388	0.339178	0.632036
-387	0.348727	0.631354
-386	0.358483	0.630623
-385	0.368444	0.629842
-384	0.378649	0.629011
-383	0.389097	0.62813
-382	0.399781	0.627199
-381	0.410683	0.62622
-380	0.421818	0.625193
-379	0.43316	0.624121
-378	0.444711	0.623005
-377	0.456486	0.621846
-376	0.468469	0.620647
-375	0.48068	0.61941
-374	0.493108	0.618136
-373	0.505734	0.616828
-372	0.518606	0.615489
-371	0.531751	0.614122
-370	0.545169	0.61273
-369	0.558876	0.611316
-368	0.572852	0.609883
-367	0.587103	0.608434
-366	0.601608	0.606972
-365	0.616334	0.605498
-364	0.631225	0.604017
-363	0.646275	0.602529
-362	0.661483	0.601037
-361	0.676788	0.599543
-360	0.692199	0.59805
-359	0.707633	0.596558
-358	0.723042	0.595069
-357	0.738406	0.593584
-356	0.753603	0.592104
-355	0.768572	0.59063
-354	0.783262	0.589163
-353	0.797548	0.587704
-352	0.811307	0.586253
-351	0.824436	0.584812
-350	0.836864	0.583384
-349	0.848558	0.581967
-348	0.859457	0.580564
-347	0.869519	0.579175
-346	0.878622	0.5778
-345	0.886721	0.57644
-344	0.893711	0.575096
-343	0.899579	0.57377
-342	0.904301	0.572462
-341	0.907807	0.571174
-340	0.910145	0.569906
-339	0.911242	0.568661
-338	0.911034	0.567436
-337	0.909573	0.566234
-336	0.906884	0.565052
-335	0.902975	0.563892
-334	0.897849	0.562751
-333	0.8915	0.561632
-332	0.883956	0.560533
-331	0.875203	0.559456
-330	0.865297	0.558399
-329	0.854301	0.557364
-328	0.842284	0.556349
-327	0.829264	0.555353
-326	0.815287	0.554375
-325	0.800427	0.553416
-324	0.784658	0.552476
-323	0.768078	0.551555
-322	0.750767	0.550654
-321	0.732719	0.549775
-320	0.714044	0.54892
-319	0.694818	0.548089
-318	0.675108	0.547285
-317	0.654992	0.546508
-316	0.634541	0.54576
-315	0.61386	0.545041
-314	0.593027	0.544352
-313	0.572093	0.543697
-312	0.551137	0.543077
-311	0.530214	0.542495
-310	0.509369	0.541954
-309	0.488629	0.541456
-308	0.468097	0.541005
-307	0.447829	0.5406
-306	0.427883	0.540244
-305	0.408339	0.539937
-304	0.389187	0.53968
-303	0.370479	0.539474
-302	0.35229	0.539322
-301	0.334652	0.539225
-300	0.317604	0.539185
-299	0.301148	0.539206
-298	0.285312	0.539288
-297	0.270109	0.539433
-296	0.255523	0.539643
-295	0.241601	0.539916
-294	0.228371	0.540254
-293	0.215854	0.540656
-292	0.204049	0.541124
-291	0.192935	0.541659
-290	0.182493	0.542262
-289	0.172721	0.542937
-288	0.163632	0.543686
-287	0.155193	0.54451
-286	0.147356	0.545412
-285	0.140115	0.546394
-284	0.133428	0.547455
-283	0.127255	0.548598
-282	0.121559	0.549824
-281	0.116323	0.551137
-280	0.11153	0.55254
-279	0.10712	0.554037
-278	0.103041	0.555634
-277	0.0992906	0.557333
-276	0.0958207	0.55914
-275	0.0926042	0.561058
-274	0.0896353	0.563092
-273	0.0868994	0.565245
-272	0.0843832	0.567522
-271	0.0820983	0.569926
-270	0.0800557	0.572462
-269	0.0782345	0.575134
-268	0.0766301	0.577946
-267	0.0752796	0.580903
-266	0.0741651	0.584008
-265	0.0732726	0.587264
-264	0.0726201	0.590673
-263	0.0722268	0.594236
-262	0.0721057	0.597954
-261	0.0722414	0.60183
-260	0.0726597	0.605865
-259	0.0733885	0.610063
-258	0.0744098	0.614427
-257	0.0757195	0.618962
-256	0.0772971	0.623671
-255	0.0791218	0.628553
-254	0.0811667	0.633612
-253	0.083408	0.638846
-252	0.0858409	0.644257
-251	0.0884328	0.649845
-250	0.0911908	0.655608
-249	0.09413	0.661548
-248	0.0971991	0.667666
-247	0.100379	0.673961
-246	0.103648	0.680433
-245	0.106985	0.68708
-244	0.110349	0.693895
-243	0.113712	0.700868
-242	0.117077	0.707986
-241	0.120422	0.715232
-240	0.123747	0.722588
-239	0.12706	0.730038
-238	0.130343	0.737556
-237	0.133626	0.745106
-236	0.136906	0.752648
-235	0.14017	0.760128
-234	0.143414	0.767489
-233	0.146613	0.774677
-232	0.149808	0.781633
-231	0.153016	0.788302
-230	0.156235	0.794627
-229	0.159494	0.800557
-228	0.162823	0.80604
-227	0.166246	0.811029
-226	0.169764	0.815481
-225	0.173397	0.819357
-224	0.177161	0.822621
-223	0.181051	0.825241
-222	0.185097	0.827201
-221	0.189303	0.828506
-220	0.193656	0.829173
-219	0.198193	0.829244
-218	0.20294	0.828764
-217	0.207907	0.827778
-216	0.213106	0.826331
-215	0.218538	0.824469
-214	0.224245	0.822237
-213	0.230215	0.819679
-212	0.236453	0.816838
-211	0.243002	0.813759
-210	0.249898	0.810484
-209	0.257161	0.807054
-208	0.264814	0.803508
-207	0.272866	0.799881
-206	0.281337	0.796203
-205	0.290212	0.792491
-204	0.299544	0.788758
-203	0.30933	0.785003
-202	0.319559	0.781222
-201	0.330285	0.777417
-200	0.341511	0.773587
-199	0.353234	0.769729
-198	0.365466	0.765844
-197	0.378214	0.76193
-196	0.391497	0.757985
-195	0.405281	0.75401
-194	0.419559	0.750003
-193	0.434336	0.745963
-192	0.449555	0.741888
-191	0.465215	0.73778
-190	0.48131	0.733637
-189	0.497853	0.729461
-188	0.514857	0.72525
-187	0.532346	0.721005
-186	0.550336	0.716727
-185	0.56877	0.712414
-184	0.587603	0.708068
-183	0.606866	0.703687
-182	0.626506	0.699272
-181	0.646532	0.694824
-180	0.666869	0.690343
-179	0.687417	0.685831
-178	0.70813	0.681286
-177	0.728921	0.676709
-176	0.749783	0.6721
-175	0.770649	0.667457
-174	0.79139	0.66278
-173	0.811937	0.658067
-172	0.832141	0.653319
-171	0.851822	0.648532
-170	0.87082	0.643708
-169	0.889013	0.638844
-168	0.906255	0.63394
-167	0.922377	0.628996
-166	0.937273	0.624009
-165	0.950812	0.618979
-164	0.962868	0.613902
-163	0.973402	0.608778
-162	0.982269	0.603605
-161	0.989424	0.59838
-160	0.994811	0.593102
-159	0.998327	0.587771
-158	1	0.582386
-157	0.999745	0.576946
-156	0.997541	0.571451
-155	0.993443	0.565899
-154	0.987489	0.560289
-153	0.979732	0.554619
-152	0.970283	0.548888
-151	0.959209	0.543094
-150	0.946561	0.537236
-149	0.932416	0.531315
-148	0.916911	0.525329
-147	0.900111	0.519278
-146	0.882166	0.513163
-145	0.863157	0.506983
-144	0.843138	0.500738
-143	0.822262	0.494427
-142	0.800578	0.488047
-141	0.77823	0.481597
-140	0.755378	0.475077
-139	0.732089	0.468484
-138	0.708469	0.461818
-137	0.684599	0.455078
-136	0.66057	0.448264
-135	0.636468	0.441375
-134	0.612385	0.434409
-133	0.588385	0.427363
-132	0.56456	0.420236
-131	0.541011	0.413024
-130	0.517773	0.405723
-129	0.494896	0.398332
-128	0.472462	0.390848
-127	0.450497	0.383267
-126	0.429086	0.375586
-125	0.408246	0.367804
-124	0.387968	0.359916
-123	0.368328	0.351922
-122	0.349348	0.343819
-121	0.33105	0.335604
-120	0.31341	0.327275
-119	0.296432	0.318829
-118	0.280123	0.310265
-117	0.264458	0.301581
-116	0.2494	0.292778
-115	0.234923	0.283855
-114	0.221034	0.274812
-113	0.207699	0.265648
-112	0.194877	0.256361
-111	0.182545	0.246949
-110	0.170655	0.237408
-109	0.159202	0.227738
-108	0.148183	0.217936
-107	0.137534	0.208004
-106	0.127246	0.19794
-105	0.11729	0.187745
-104	0.107649	0.177419
-103	0.0982891	0.166964
-102	0.0892112	0.156379
-101	0.0804548	0.145666
-100	0.0720072	0.134823
-99	0.0639138	0.123852
-98	0.0561951	0.112756
-97	0.0488824	0.101541
-96	0.0420311	0.0902164
-95	0.0356366	0.0787961
-94	0.0297029	0.0672967
-93	0.0242166	0.0557346
-92	0.0191649	0.0441276
-91	0.0146038	0.0325002
-90	0.0105309	0.0208873
-89	0.00703422	0.00932954
-88	0.00419525	0.00234933
-87	0.00207461	0
-86	0.000675807	0.00233593
-85	0	0.00941254
-84	0.000109527	0.0212841
-83	0.000923408	0.038004
-82	0.002423	0.0596232
-81	0.00469103	0.0861899
-80	0.00768905	0.117748
-79	0.0114893	0.154338
-78	0.0161722	0.195997
-77	0.0217598	0.242758
-76	0.0283099	0.294648
-75	0.0358067	0.351679
-74	0.0442712	0.413846
-73	0.0536328	0.481128
-72	0.0638189	0.544539
-71	0.0748095	0.604034
-70	0.086558	0.659566
-69	0.0990133	0.711085
-68	0.11209	0.758545
-67	0.125805	0.801899
-66	0.140101	0.841099
-65	0.154766	0.876101
-64	0.16973	0.906858
-63	0.184848	0.933328
-62	0.19993	0.955468
-61	0.214908	0.973237
-60	0.229639	0.9866
-59	0.244053	0.995526
-58	0.258045	0.999996
-57	0.271536	0.999996
-56	0.284485	0.999997
-55	0.296779	0.999997
-54	0.308375	0.999998
-53	0.319221	0.999998
-52	0.32925	0.999999
-51	0.338381	0.999999
-50	0.346584	0.999999
-49	0.353953	0.999999
-48	0.360531	1
-47	0.366382	1
-46	0.371645	1
-45	0.376368	1
-44	0.380613	1
-43	0.384388	1
-42	0.387714	1
-41	0.39063	1
-40	0.393127	1
-39	0.395295	1
-38	0.397208	1
-37	0.398954	0.999999
-36	0.400663	0.999999
-35	0.402443	0.999999
-34	0.404357	0.999998
-33	0.406416	0.999998
-32	0.408612	0.999998
-31	0.410941	0.999997
-30	0.413333	0.999997
-29	0.415762	0.999996
-28	0.418247	0.999996
-27	0.420803	0.999995
-26	0.4235	0.999995
-25	0.426378	0.999994
-24	0.429471	0.999994
-23	0.432753	0.999993
-22	0.436163	0.999993
-21	0.439639	0.999992
-20	0.443085	0.999992
-19	0.446436	0.999991
-18	0.44966	0.999991
-17	0.452697	0.99999
-16	0.45554	0.99999
-15	0.458191	0.999989
-14	0.46067	0.999989
-13	0.462993	0.999988
-12	0.465155	0.999988
-11	0.467171	0.999987
-10	0.468997	0.999987
-9	0.470593	0.999987
-8	0.471977	0.999986
-7	0.473157	0.999986
-6	0.474132	0.999986
-5	0.474921	0.999986
-4	0.475537	0.999985
-3	0.475999	0.999985
-2	0.476305	0.999985
-1	0.476515	0.999985
0	0.476635	0.999985
1	0.476682	0.999985
2	0.476679	0.999985
3	0.476633	0.999985
4	0.476522	0.999985
5	0.476296	0.999986
6	0.475896	0.999986
7	0.475277	0.999986
8	0.47436	0.999986
9	0.473108	0.999987
10	0.471555	0.999987
11	0.469701	0.999987
12	0.467584	0.999988
13	0.465216	0.999988
14	0.462618	0.999989
15	0.459807	0.999989
16	0.456764	0.99999
17	0.453456	0.99999
18	0.44983	0.999991
19	0.445881	0.999991
20	0.441593	0.999992
21	0.437044	0.999992
22	0.432336	0.999993
23	0.427564	0.999993
24	0.422843	0.999994
25	0.418245	0.999994
26	0.413783	0.999995
27	0.409461	0.999995
28	0.405255	0.999996
29	0.401175	0.999996
30	0.397222	0.999997
31	0.393384	0.999997
32	0.389774	0.999998
33	0.386442	0.999998
34	0.383403	0.999998
35	0.380631	0.999999
36	0.378134	0.999999
37	0.37583	0.999999
38	0.373627	1
39	0.371454	1
40	0.369211	1
41	0.366795	1
42	0.364137	1
43	0.361201	1
44	0.357945	1
45	0.354293	1
46	0.350178	1
47	0.345548	1
48	0.340232	1
49	0.334105	0.999999
50	0.327171	0.999999
51	0.319375	0.999999
52	0.310697	0.999999
53	0.301209	0.999998
54	0.29095	0.999998
55	0.279931	0.999997
56	0.268192	0.999997
57	0.255823	0.999996
58	0.242897	0.999996
59	0.229472	0.995526
60	0.215646	0.9866
61	0.201541	0.973237
62	0.187275	0.955468
63	0.172942	0.933328
64	0.158672	0.906858
65	0.144673	0.876101
66	0.13096	0.841099
67	0.117684	0.801899
68	0.104967	0.758545
69	0.0927347	0.711085
70	0.081045	0.659566
71	0.0699926	0.604034
72	0.0596248	0.544539
73	0.0500173	0.481128
74	0.0412464	0.413846
75	0.0334058	0.351679
76	0.0265091	0.294648
77	0.0205457	0.242758
78	0.0154952	0.195997
79	0.011304	0.154338
80	0.00793782	0.117748
81	0.00529168	0.0861899
82	0.00340933	0.0596232
83	0.00228551	0.038004
84	0.00186954	0.0212841
85	0.00230823	0.00941254
86	0.00361324	0.00233593
87	0.00572804	0
88	0.00868645	0.00234933
89	0.0123853	0.00932954
90	0.0167163	0.0208873
91	0.0215518	0.0325002
92	0.026854	0.0441276
93	0.0326036	0.0557346
94	0.038761	0.0672967
95	0.0453507	0.0787961
96	0.0523878	0.0902164
97	0.0598747	0.101541
98	0.0677927	0.112756
99	0.0760854	0.123852
100	0.0847159	0.134823
101	0.0936359	0.145666
102	0.102799	0.156379
103	0.112219	0.166964
104	0.121843	0.177419
105	0.131693	0.187745
106	0.141837	0.19794
107	0.15232	0.208004
108	0.163176	0.217936
109	0.174406	0.227738
110	0.186082	0.237408
111	0.198226	0.246949
112	0.210835	0.256361
113	0.223945	0.265648
114	0.237573	0.274812
115	0.251756	0.283855
116	0.266563	0.292778
117	0.281969	0.301581
118	0.298017	0.310265
119	0.314726	0.318829
120	0.332091	0.327275
121	0.350137	0.335604
122	0.368809	0.343819
123	0.388132	0.351922
124	0.408045	0.359916
125	0.428535	0.367804
126	0.449535	0.375586
127	0.470988	0.383267
128	0.49291	0.390848
129	0.515233	0.398332
130	0.537876	0.405723
131	0.560769	0.413024
132	0.583824	0.420236
133	0.606955	0.427363
134	0.630071	0.434409
135	0.653078	0.441375
136	0.675951	0.448264
137	0.698579	0.455078
138	0.720923	0.461818
139	0.742851	0.468484
140	0.764323	0.475077
141	0.785247	0.481597
142	0.805556	0.488047
143	0.825207	0.494427
144	0.844019	0.500738
145	0.861929	0.506983
146	0.878851	0.513163
147	0.89472	0.519278
148	0.909459	0.525328
149	0.923038	0.531315
150	0.935393	0.537236
151	0.946439	0.543094
152	0.956077	0.548888
153	0.964279	0.554619
154	0.970968	0.560288
155	0.976101	0.565898
156	0.97964	0.57145
157	0.98157	0.576946
158	0.981859	0.582386
159	0.980453	0.587771
160	0.97744	0.593102
161	0.972821	0.598379
162	0.966654	0.603604
163	0.958982	0.608778
164	0.949825	0.613902
165	0.939263	0.618979
166	0.927322	0.624009
167	0.914108	0.628996
168	0.899699	0.63394
169	0.884193	0.638844
170	0.867712	0.643708
171	0.850393	0.648532
172	0.83232	0.653319
173	0.813569	0.658067
174	0.794231	0.66278
175	0.774426	0.667457
176	0.754202	0.672099
177	0.733697	0.676709
178	0.713015	0.681286
179	0.692227	0.68583
180	0.671441	0.690343
181	0.65068	0.694824
182	0.63009	0.699272
183	0.609761	0.703687
184	0.589746	0.708067
185	0.57008	0.712414
186	0.550782	0.716727
187	0.531891	0.721005
188	0.513412	0.72525
189	0.4954	0.729461
190	0.477906	0.733637
191	0.460949	0.73778
192	0.444581	0.741888
193	0.428789	0.745963
194	0.41357	0.750003
195	0.398925	0.75401
196	0.384846	0.757985
197	0.371364	0.76193
198	0.358419	0.765844
199	0.345958	0.769729
200	0.334006	0.773587
201	0.322528	0.777417
202	0.311528	0.781222
203	0.300972	0.785002
204	0.290893	0.788758
205	0.281269	0.792491
206	0.27207	0.796203
207	0.2633	0.799881
208	0.254946	0.803508
209	0.246975	0.807054
210	0.239346	0.810484
211	0.232053	0.813759
212	0.225085	0.816838
213	0.218396	0.819678
214	0.211983	0.822237
215	0.205845	0.824469
216	0.199939	0.826331
217	0.194292	0.827778
218	0.188871	0.828764
219	0.18365	0.829244
220	0.178628	0.829173
221	0.1738	0.828506
222	0.169182	0.827201
223	0.164727	0.825241
224	0.160403	0.822621
225	0.156207	0.819357
226	0.152146	0.815481
227	0.148194	0.811029
228	0.144352	0.80604
229	0.140649	0.800557
230	0.13708	0.794627
231	0.133658	0.788301
232	0.130393	0.781633
233	0.127279	0.774677
234	0.124309	0.767489
235	0.121491	0.760127
236	0.118788	0.752648
237	0.116201	0.745106
238	0.113709	0.737555
239	0.111313	0.730038
240	0.108983	0.722588
241	0.106708	0.715231
242	0.104495	0.707986
243	0.102369	0.700868
244	0.100306	0.693895
245	0.0982903	0.68708
246	0.0963368	0.680433
247	0.0944149	0.673961
248	0.0925104	0.667666
249	0.0906239	0.661548
250	0.0887789	0.655608
251	0.0869891	0.649844
252	0.085288	0.644257
253	0.0836556	0.638846
254	0.0820948	0.633612
255	0.0806581	0.628553
256	0.0793857	0.623671
257	0.0782957	0.618962
258	0.0773857	0.614427
259	0.0766714	0.610063
260	0.0761943	0.605865
261	0.0759723	0.60183
262	0.075998	0.597954
263	0.0763149	0.594236
264	0.0769476	0.590673
265	0.0778821	0.587264
266	0.0791294	0.584008
267	0.0806832	0.580903
268	0.0825282	0.577946
269	0.0846751	0.575134
270	0.0871231	0.572462
271	0.0898316	0.569926
272	0.092839	0.567521
273	0.0961638	0.565245
274	0.0998155	0.563092
275	0.10378	0.561058
276	0.108039	0.55914
277	0.112612	0.557333
278	0.117499	0.555634
279	0.122704	0.554037
280	0.12824	0.55254
281	0.134131	0.551137
282	0.140383	0.549824
283	0.14702	0.548598
284	0.154074	0.547455
285	0.161592	0.546393
286	0.169617	0.545412
287	0.178185	0.54451
288	0.187288	0.543686
289	0.196939	0.542937
290	0.207164	0.542262
291	0.21797	0.541659
292	0.229393	0.541124
293	0.241412	0.540656
294	0.254052	0.540254
295	0.267314	0.539916
296	0.281185	0.539643
297	0.295706	0.539433
298	0.31085	0.539288
299	0.326582	0.539206
300	0.342913	0.539185
301	0.3598	0.539224
302	0.377222	0.539321
303	0.395155	0.539474
304	0.413538	0.539679
305	0.432347	0.539937
306	0.45155	0.540244
307	0.471122	0.5406
308	0.491007	0.541005
309	0.51117	0.541456
310	0.531569	0.541954
311	0.552145	0.542495
312	0.572829	0.543076
313	0.593513	0.543697
314	0.614185	0.544352
315	0.63481	0.545041
316	0.655256	0.54576
317	0.675442	0.546508
318	0.69528	0.547285
319	0.714687	0.548089
320	0.733635	0.548919
321	0.752047	0.549775
322	0.769803	0.550654
323	0.786831	0.551554
324	0.803058	0.552476
325	0.818391	0.553416
326	0.832762	0.554375
327	0.846113	0.555353
328	0.85842	0.556349
329	0.869631	0.557364
330	0.879656	0.558399
331	0.888475	0.559455
332	0.896092	0.560533
333	0.902496	0.561631
334	0.907688	0.562751
335	0.91167	0.563891
336	0.914428	0.565052
337	0.915935	0.566233
338	0.916215	0.567436
339	0.915282	0.56866
340	0.913148	0.569906
341	0.909896	0.571173
342	0.905576	0.572462
343	0.900215	0.57377
344	0.893831	0.575096
345	0.886465	0.576439
346	0.878172	0.5778
347	0.868981	0.579175
348	0.85894	0.580564
349	0.848104	0.581967
350	0.836483	0.583383
351	0.824115	0.584812
352	0.81104	0.586253
353	0.797349	0.587703
354	0.783136	0.589163
355	0.76846	0.59063
356	0.753412	0.592104
357	0.738019	0.593584
358	0.722274	0.595069
359	0.70623	0.596557
360	0.689956	0.598049
361	0.673486	0.599543
362	0.656895	0.601037
363	0.640248	0.602529
364	0.623603	0.604017
365	0.607016	0.605498
366	0.590545	0.606972
367	0.574251	0.608434
368	0.558186	0.609883
369	0.542364	0.611316
370	0.52681	0.61273
371	0.511534	0.614122
372	0.496518	0.615489
373	0.481766	0.616828
374	0.467351	0.618135
375	0.453321	0.619409
376	0.439689	0.620647
377	0.4265	0.621846
378	0.413729	0.623005
379	0.401341	0.624121
380	0.389337	0.625193
381	0.377687	0.62622
382	0.366396	0.627199
383	0.355438	0.62813
384	0.344789	0.629011
385	0.334483	0.629842
386	0.324477	0.630623
387	0.314767	0.631354
388	0.30539	0.632036
389	0.296348	0.632668
390	0.28762	0.633252
391	0.279173	0.633787
392	0.270986	0.634272
393	0.263047	0.634709
394	0.255365	0.635098
395	0.247959	0.635438
396	0.240825	0.63573
397	0.233989	0.635975
398	0.227477	0.636175
399	0.221297	0.636329
