# Supplementary material for: Detection of new pioneer transcription factors as cell-type-specific nucleosome binders
Source: eLife. 2024 Jan 31;12:RP88936. doi: 10.7554/eLife.88936 (PMC10945518; doi:10.7554/eLife.88936)
Supplement: Figure 4—figure supplement 2—source data 1. [file elife-88936-fig4-figsupp2-data1.xlsx]

## Sheet: Sheet1
TF	Domain	EMI penetration (lig147)	End preference	Periodicity strength	Periodic preference	Phase relative to TA (pi)	Groove preference	Dyad EMI intensity	Dyad preference	Gyre-spanning mode intensity	Gyre-spanning	Orientational asymmetry	Log10(p_value of asymmetry)	Orientational preference	Log2(EMIub/EMIb)	Nucleosome stability
CDX1	Homeodomain	44.5	No	0.00139	Yes	-0.461822	Major	0.161351	No	0.25364	No	0.0419606	-3.65	No	0.280062	Destabilizer
YBX1	CSD	42.5	No	2.19e-05	No	-0.139107	NA	0.139549	No	0.244548	No	0.104155	-0.00188	No	0.273832	Destabilizer
MIXL1	Homeodomain	42	No	0.00105477	Yes	0.0519071	Major	0.152134	No	0.259742	No	0.0217382	-0.000928	No	0.0516606	Destabilizer
FOXD3	Forkhead	42	No	0.00122112	Yes	-0.539158	Minor	0.143333	No	0.257248	No	0.0196456	-1.04e-06	No	0.0257105	Destabilizer
HOXA10	Homeodomain	42	No	0.000696095	No	-0.518618	NA	0.153718	No	0.251918	No	0.0492407	-4.18399	No	0.0422386	Destabilizer
SHOX	Homeodomain	41	No	0.00155963	Yes	-0.136903	Major	0.174261	No	0.255178	No	0.0243181	-0.0423238	No	0.200039	Destabilizer
NKX6-2	Homeodomain	40.5	No	0.000761559	No	-0.430588	NA	0.164176	No	0.239938	No	NA	NA	NA	NA	NA
PDX1	Homeodomain	40.5	No	0.0015971	Yes	-0.364055	Major	0.159201	No	0.249337	No	0.029352	-4.81	No	NA	NA
LBX2	Homeodomain	40	No	0.00111479	Yes	-0.347092	Major	0.16652	No	0.255052	No	0.0237382	-0.337	No	0.0602809	Destabilizer
MSX2	Homeodomain	40	No	0.00116058	Yes	-0.00409437	Major	0.126252	No	0.254945	No	0.0275851	-0.955	No	-0.0553169	Stabilizer
LMX1A	Homeodomain	39.5	No	0.000804185	No	-0.459901	NA	0.139001	No	0.252833	No	0.0234401	-0.0065	No	0.0462183	Destabilizer
MSX1	Homeodomain	39	No	0.00143298	Yes	-0.223771	Major	0.118741	No	0.256523	No	0.0245078	-0.174	No	0.00188216	Destabilizer
LMX1B	Homeodomain	38.5	No	0.000593345	No	-0.114974	NA	0.170908	No	0.249328	No	0.035112	-3.73	No	0.197628	Destabilizer
EN2	Homeodomain	38.5	No	0.000487362	No	-0.509334	NA	0.172875	No	0.240585	No	0.0247483	-1.34e-05	No	NA	NA
EN1	Homeodomain	38.5	No	0.000822806	No	-0.569216	NA	0.184701	No	0.229436	No	0.0325719	-0.0285	No	NA	NA
TGIF2LY	MEIS	37.5	No	0.000327906	No	0.924798	NA	0.0956802	No	0.258689	No	0.0234024	-0.000228	No	0.253921	Destabilizer
MYBL1	MYB	37.5	No	0.000232413	No	0.945107	NA	0.187444	No	0.245479	No	NA	NA	NA	-0.0910194	Stabilizer
MEIS3	MEIS	37.5	No	0.000749827	No	0.805757	NA	0.132398	No	0.257167	No	0.0313108	-0.12	No	0.0194696	Destabilizer
HES2	bHLH	37.5	No	0.00218623	Yes	-0.611765	Minor	0.0978278	No	0.236322	No	NA	NA	NA	NA	NA
TGIF2LX	MEIS	36.5	No	0.000466426	No	0.791294	NA	0.122648	No	0.248643	No	0.0265736	-2.42e-05	No	-0.114759	Stabilizer
FOXI1	Forkhead	36	No	0.00116786	Yes	-0.464825	Major	0.0965034	No	0.248458	No	0.0189539	-0.000892066	No	-0.129402	Stabilizer
RUNX3	RUNT	36	No	0.00155489	Yes	-0.752318	Minor	0.120907	No	0.245873	No	0.0506482	-2.38181	No	-0.133583	Stabilizer
RAX	Homeodomain	35.5	No	0.00145107	Yes	-0.1925	Major	0.111821	No	0.255843	No	0.0192298	-0.0488863	No	-0.0253972	Stabilizer
FOXJ2	Forkhead	35.5	No	0.00118421	Yes	-0.506308	Minor	0.140434	No	0.257251	No	0.0648465	-1.31551	No	-0.136638	Stabilizer
TGIF2	MEIS	35	No	0.000794221	No	0.613145	NA	0.134645	No	0.251565	No	NA	NA	NA	NA	NA
HOXD9	Homeodomain	35	No	0.00147054	Yes	-0.48612	Major	0.145017	No	0.248428	No	NA	NA	NA	NA	NA
VSX1	Homeodomain	34.5	No	0.00110721	Yes	-0.00399465	Major	0.0808415	No	0.257412	No	0.0169008	-0.00961	No	-0.0413268	Stabilizer
THRB	Nuclear_receptor	34.5	No	0.000327902	No	0.76433	NA	0.0754662	No	0.244216	No	0.0558078	-5.4	No	0.239358	Destabilizer
SOX18	HMG	34	No	0.00252785	Yes	0.162774	Major	0.245612	Yes	0.255728	No	0.0874199	-6.03	No	0.255038	Destabilizer
NR4A2	Nuclear_receptor	34	No	0.00178729	Yes	0.914859	Minor	0.156116	No	0.249154	No	0.032982	-0.0954	No	0.336026	Destabilizer
ATOH1	bHLH	33.5	No	0.000602669	No	-0.549105	NA	0.134909	No	0.245581	No	0.0541957	-4.34	No	-0.0304303	Stabilizer
SOX7	HMG	33.5	No	0.00363547	Yes	0.0202746	Major	0.254857	Yes	0.251067	No	0.0703842	-11.2	No	-0.127192	Stabilizer
GATA4	Znf_GATA	33	No	0.000583056	No	-0.289624	NA	0.0938152	No	0.251555	No	0.0602768	-9.57e-10	No	0.0945449	Destabilizer
VENTX	Homeodomain	33	No	0.000263724	No	0.906747	NA	0.0956455	No	0.255263	No	0.02319	-1.53	No	-0.0189128	Stabilizer
BHLHA15	bHLH	33	No	0.000369857	No	-0.902051	NA	0.218343	Yes	0.245736	No	0.0231435	-0.0402	No	0.317363	Destabilizer
FOXD2	Forkhead	32.5	No	0.00125208	Yes	-0.624252	Minor	0.155912	No	0.258103	No	0.0185721	-2.74e-10	No	0.133027	Destabilizer
SOX10	HMG	32	No	0.00412958	Yes	-0.0252346	Major	0.300366	Yes	0.252582	No	0.0767047	-19	No	0.114262	Destabilizer
VAX2	Homeodomain	32	No	0.00148572	Yes	-0.218487	Major	0.125821	No	0.251577	No	0.0506079	-6.22	No	0.265111	Destabilizer
NFATC3	RHD	31.5	No	0.00544515	Yes	-0.736399	Minor	0.199637	No	0.235788	No	0.0421517	-2.21e-06	No	-0.0919165	Stabilizer
DLX5	Homeodomain	31.5	No	0.00122577	Yes	-0.220101	Major	0.139557	No	0.253635	No	0.0303043	-1.3629	No	0.107285	Destabilizer
HOXA2	Homeodomain	31.5	No	0.00112276	Yes	-0.619203	Minor	0.0350281	No	0.254804	No	NA	NA	NA	NA	NA
SOX2	HMG	31.5	No	0.000271957	No	0.690513	NA	0.227292	Yes	0.259031	No	NA	NA	NA	NA	NA
HOXD4	Homeodomain	31.5	No	0.000912475	No	-0.550455	NA	0.134267	No	0.248309	No	0.0211748	-0.258091	No	NA	NA
TBX21	T_box	31	No	0.000802931	No	0.98972	NA	0.147315	No	0.242411	No	0.0332401	-2.49	No	NA (SBP)	NA (SBP)
HOXC11	Homeodomain	31	No	0.000960001	Yes	0.638926	Minor	0.17579	No	0.253519	No	NA	NA	NA	-0.0305155	Stabilizer
SOX11	HMG	31	No	0.0091149	Yes	-0.00408262	Major	0.399472	Yes	0.241318	No	0.0898477	-22.3	No	NA	NA
TBX3	T_box	30.5	No	0.000957613	No	-0.458637	NA	0.122373	No	0.248581	No	0.0338799	-1.48	No	0.0767116	Destabilizer
DLX4	Homeodomain	30.5	No	0.00192337	Yes	-0.267595	Major	0.131906	No	0.251	No	0.0302381	-1.78	No	0.105288	Destabilizer
SOX12	HMG	30.5	No	0.00579929	Yes	0.0227917	Major	0.31183	Yes	0.243994	No	0.0688164	-16.5	No	NA	NA
NFATC1	RHD	30	No	0.00245087	Yes	-0.71055	Minor	0.201836	No	0.245121	No	0.0434305	-5.59e-07	No	0.182	Destabilizer
E2F8	E2F	30	No	0.000456114	No	-0.641009	NA	0.103539	No	0.24787	No	0.0320686	-1.93e-07	No	0.203942	Destabilizer
DLX1	Homeodomain	30	No	0.00253191	Yes	-0.222119	Major	0.10762	No	0.252066	No	0.0343024	-2.24	No	0.0685821	Destabilizer
FOXO6	Forkhead	30	No	0.000784958	No	-0.414566	NA	0.110673	No	0.257027	No	NA	NA	NA	NA	NA
EVX1	Homeodomain	30	No	0.00104746	Yes	-0.510224	Minor	0.128923	No	0.245738	No	0.0225507	-1.31	No	NA	NA
BHLHB8	bHLH	29.5	No	0.000719882	No	-0.989868	NA	0.269185	Yes	0.248733	No	0.0209614	-0.59	No	-0.097382	Stabilizer
PROP1	Homeodomain	29	No	0.000399108	No	-0.0230959	NA	0.126032	No	0.255556	No	0.0275828	-0.0758	No	0.343959	Destabilizer
PRRX1	Homeodomain	29	No	0.00147617	Yes	-0.428324	Major	0.0453496	No	0.251447	No	NA	NA	NA	NA	NA
GSC2	Homeodomain	28	No	0.000171123	No	0.150379	NA	0.132638	No	0.241819	No	0.0405733	-2.11e-05	No	NA	NA
EOMES	T_box	27.5	No	0.00642646	Yes	0.783015	Minor	0.21584	No	0.244281	No	0.0280263	-0.0592879	No	NA (SBP)	NA (SBP)
BHLHB2	bHLH	27.5	No	0.000937111	No	0.397327	NA	0.147303	No	0.247734	No	0.0266469	-0.0607879	No	0.385905	Destabilizer
PAX7	PAX	27	No	0.000800207	No	-0.713199	NA	0.121053	No	0.249673	No	0.0436233	-1.38416	No	0.420028	Destabilizer
RFX5	RFX	27	No	0.00192712	Yes	0.59913	Minor	0.645219	Yes	0.245964	No	0.11242	-0.264466	No	NA	NA
TBX4	T_box	26.5	No	0.000950455	No	0.477865	NA	0.181019	No	0.236432	No	0.0407026	-2.55	No	-0.348359	Stabilizer
NHLH1	bHLH	26.5	No	0.000321554	No	-0.240823	NA	0.168241	No	0.246698	No	0.0208342	-0.0316	No	0.0579463	Destabilizer
FOXO1	Forkhead	26.5	No	0.00175816	Yes	-0.404706	Major	0.0792141	No	0.261633	No	NA	NA	NA	NA	NA
OLIG2	bHLH	25.5	No	0.000572333	No	0.578331	NA	0.101976	No	0.24061	No	0.0424044	-0.261	No	0.155288	Destabilizer
VSX2	Homeodomain	25.5	No	0.000618582	No	-0.40232	NA	0.15826	No	0.256208	No	0.0376025	-4.15	No	0.281576	Destabilizer
FOXK1	Forkhead	23.5	No	0.000556602	No	-0.544531	NA	0.126537	No	0.258768	No	NA	NA	NA	NA	NA
ALX3	Homeodomain	23	No	0.000910958	No	-0.219158	NA	0.0551911	No	0.262374	No	0.016003	-9.64e-07	No	NA	NA
HOXD3	Homeodomain	22.5	No	0.00118992	Yes	-0.443214	Major	0.0907698	No	0.247207	No	0.0227805	-5.28e-06	No	NA	NA
NANOG	Homeodomain	22.5	No	0.000231852	No	0.644911	NA	0.114093	No	0.257119	No	0.0184044	-0.000158481	No	NA	NA
DRGX	Homeodomain	22	No	0.00181729	Yes	-0.552289	Minor	0.0862364	No	0.270799	No	0.0195632	-0.0485637	No	-0.0577154	Stabilizer
VAX1	Homeodomain	22	No	0.000672649	No	-0.586312	NA	0.0621308	No	0.253077	No	NA	NA	NA	NA	NA
DLX2	Homeodomain	20.5	No	0.0031757	Yes	-0.334431	Major	0.0283179	No	0.249059	No	0.028671	-1.4	No	-0.187512	Stabilizer
HOXB7	Homeodomain	20	Yes	0.00162678	Yes	-0.498595	Major	0.154492	No	0.251639	No	0.0265412	-1.25	No	0.112305	Destabilizer
BHLHE22	bHLH	20	Yes	0.00146973	Yes	0.0270438	Major	0.11367	No	0.241161	No	0.0480947	-3.34	No	0.204191	Destabilizer
FOXE1	Forkhead	19	Yes	0.00205127	Yes	-0.431336	Major	0.0946564	No	0.252828	No	NA	NA	NA	0.189389	Destabilizer
LEF1	HMG	19	Yes	0.00162511	Yes	0.135037	Major	0.157617	No	0.250524	No	NA	NA	NA	0.163391	Destabilizer
ARGFX	Homeodomain	18.5	Yes	0.00057399	No	-0.913423	NA	0.144276	No	0.244262	No	0.0170169	-6.91e-06	No	NA	NA
MEIS2	MEIS	18	Yes	0.00119383	Yes	0.942438	Minor	0.0980726	No	0.250013	No	NA	NA	NA	-0.184274	Stabilizer
OTX1	Homeodomain	18	Yes	0.00139335	Yes	0.181909	Major	0.071855	No	0.250737	No	0.0251211	-0.528	No	NA	NA
ELF4	ETS	17.5	Yes	0.00087474	No	-0.730127	NA	0.0479746	No	0.246774	No	0.230359	-16.5	Yes	0.196042	Destabilizer
FOXK2	Forkhead	17	Yes	0.000167472	No	-0.355531	NA	0.130315	No	0.232431	No	NA	NA	NA	NA	NA
NFATC4	RHD	16.5	Yes	0.00359535	Yes	-0.741407	Minor	0.125279	No	0.246647	No	0.0772691	-1.35e-15	No	-0.0031953	Stabilizer
PITX3	Homeodomain	16.5	Yes	0.00147875	Yes	0.203607	Major	0.0689703	No	0.25002	No	0.0152123	-3.41e-07	No	NA	NA
MYBL2	MYB	16	Yes	0.00133164	Yes	-0.809691	Minor	0.057558	No	0.251261	No	0.0475488	-0.758587	No	0.02635	Destabilizer
TLX2	Homeodomain	15.5	Yes	0.00193638	Yes	0.120751	Major	0.0727041	No	0.305044	No	NA	NA	NA	-0.0772599	Stabilizer
PITX2	Homeodomain	15.5	Yes	0.00158646	Yes	0.131928	Major	0.0674998	No	0.254321	No	0.067141	-6.04301	No	0.120618	Destabilizer
BARHL1	Homeodomain	15.5	Yes	0.000780223	No	-0.205718	NA	0.027084	No	0.249192	No	0.0326281	-0.529672	No	-0.0530218	Stabilizer
PROX1	Homeodomain	15	Yes	0.00110349	Yes	-0.0521359	Major	0.0558335	No	0.239789	No	0.0414783	-1.81843	No	0.0561338	Destabilizer
OTX2	Homeodomain	14.5	Yes	0.000601759	No	-0.0599564	NA	0.0219218	No	0.252381	No	NA	NA	NA	-0.135038	Stabilizer
IRF3	IRF	14.5	Yes	0.000826979	No	-0.0979937	NA	0.0899441	No	0.250245	No	0.120726	-22.2842	Yes	0.265993	Destabilizer
HMX1	Homeodomain	14.5	Yes	0.000224216	No	-0.289987	NA	0.0589179	No	0.256876	No	NA	NA	NA	NA	NA
ONECUT2	CUT	14	Yes	0.000854606	No	-0.829691	NA	0.0076853	No	0.249626	No	0.0295576	-0.824	No	-0.239388	Stabilizer
HES5	bHLH	14	Yes	0.00348686	Yes	-0.642557	Minor	0.0154066	No	0.239631	No	NA	NA	NA	NA	NA
PHOX2B	Homeodomain	14	Yes	0.00118559	Yes	-0.392382	Major	0.0506698	No	0.252166	No	NA	NA	NA	NA	NA
PITX1	Homeodomain	13.5	Yes	0.00155999	Yes	0.078218	Major	0.0253815	No	0.266878	No	0.0691821	-9.17	No	-0.114769	Stabilizer
SOX14	HMG	13.5	Yes	0.000918311	No	0.481756	NA	0.177497	No	0.258934	No	NA	NA	NA	NA	NA
MLLT7	Forkhead	13.5	Yes	0.00113508	Yes	-0.55709	Minor	0.132348	No	0.240047	No	0.0362603	-2.29e-12	No	NA	NA
ISL1	Homeodomain	13.5	Yes	0.00260648	Yes	-0.69251	Minor	0.124592	No	0.258914	No	NA	NA	NA	NA	NA
FOXA2	Forkhead	13	Yes	0.00183994	Yes	-0.641035	Minor	0.0344823	No	0.256182	No	0.0735993	-6.6241	No	0.145592	Destabilizer
TFAP2B	AP2	13	Yes	0.000158828	No	0.913258	NA	0.0538669	No	0.235577	No	0.0379328	-2.02649	No	0.24187	Destabilizer
DMBX1	Homeodomain	13	Yes	0.000850137	No	0.0913705	NA	0.0149724	No	0.246233	No	0.0265587	-0.00397282	No	-0.101627	Stabilizer
PKNOX2	MEIS	13	Yes	0.000604066	No	0.809708	NA	0.0734288	No	0.247733	No	0.0299209	-0.00278367	No	-0.0916261	Stabilizer
POU4F2	POU	12.5	Yes	0.000585342	No	-0.856637	NA	0.0401681	No	0.253019	No	0.0702355	-2.35587	No	-0.108157	Stabilizer
HMBOX1	Homeodomain	12.5	Yes	0.000474749	No	-0.529502	NA	0.0436314	No	0.249354	No	0.0267207	-2.69714	No	-0.15898	Stabilizer
IRX5	Homeodomain	12.5	Yes	0.00152114	Yes	-0.984714	Minor	0.0408943	No	0.245358	No	NA	NA	NA	-0.120369	Stabilizer
MYOG	bHLH	12.5	Yes	0.00030069	No	-0.937282	NA	0.138019	No	0.246904	No	0.0239414	-0.000114319	No	-0.100532	Stabilizer
CUX1	CUT	12	Yes	0.00170518	Yes	-0.789926	Minor	0.0727828	No	0.252778	No	0.0319295	-1.9034	No	0.225893	Destabilizer
NFKB2	RHD	12	Yes	0.000829077	No	0.369621	NA	0.122446	No	0.250438	No	NA	NA	NA	-0.0346368	Stabilizer
USF2	bHLH	12	Yes	0.000834756	No	0.271124	NA	0.0599661	No	0.248856	No	0.0532339	-4.73664	No	0.249667	Destabilizer
MNX1	Homeodomain	11.5	Yes	0.000390446	No	0.0415329	NA	0.0243425	No	0.254117	No	0.0186093	-0.000183222	No	-0.213732	Stabilizer
TFAP2C	AP2	11.5	Yes	0.000244212	No	-0.477271	NA	0.0404542	No	0.240577	No	0.0310426	-0.756494	No	0.162224	Destabilizer
NR3C2	Nuclear_receptor	11.5	Yes	0.000701622	No	-0.683843	NA	0.0776831	No	0.245321	No	0.0368866	-4.99824	No	-0.0648504	Stabilizer
ELF1	ETS	11.5	Yes	0.000785954	No	-0.784403	NA	0.0353202	No	0.253119	No	0.232588	-19.6205	Yes	0.0295115	Destabilizer
IRX1	Homeodomain	11.5	Yes	0.00133145	Yes	-0.907409	Minor	0.0824883	No	0.242901	No	NA	NA	NA	-0.195968	Stabilizer
ELF2	ETS	11.5	Yes	0.000816241	No	-0.761665	NA	0.0514301	No	0.248028	No	0.185366	-19.1913	Yes	0.412255	Destabilizer
GATA2	Znf_GATA	11.5	Yes	0.000688298	No	-0.297215	NA	0.0266812	No	0.251013	No	0.0578116	-7.50337	No	0.0422447	Destabilizer
SIX6	Homeodomain	11.5	Yes	0.000321693	No	-0.255189	NA	0.0716223	No	0.250408	No	NA	NA	NA	NA	NA
ESX1	Homeodomain	11	Yes	0.00226519	Yes	-0.118987	Major	0.0938681	No	0.255005	No	0.0448738	-3.76534	No	0.233705	Destabilizer
FEV	ETS	11	Yes	0.00235226	Yes	-0.878429	Minor	0.0433477	No	0.248749	No	0.206611	-13.642	Yes	0.246144	Destabilizer
TBX2	T_box	10.5	Yes	0.00124958	Yes	0.983067	Minor	0.242083	Yes	0.329695	Yes	0.031216	-0.00925444	No	-0.357937	Stabilizer
NKX2-3	Homeodomain	10.5	Yes	0.000876625	No	-0.982312	NA	0.0671693	No	0.244083	No	0.0295174	-2.87172	No	-0.0852054	Stabilizer
FOXB1	Forkhead	10.5	Yes	0.00152724	Yes	-0.670984	Minor	0.0403783	No	0.250187	No	0.0568689	-3.40151	No	0.379706	Destabilizer
IRF8	IRF	10.5	Yes	0.00144721	Yes	-0.659271	Minor	0.0830255	No	0.252247	No	0.245628	-23.3284	Yes	NA (SBP)	NA (SBP)
SRF	MADS	10.5	Yes	0.000160329	No	-0.580276	NA	0.117996	No	0.249267	No	0.0511899	-8.76428	No	NA	NA
HOXB13	Homeodomain	10.5	Yes	0.00098022	Yes	-0.59996	Minor	0.147394	No	0.247791	No	0.0377143	-0.0602492	No	NA	NA
POU3F4	POU	10	Yes	0.000296977	No	0.8621	NA	0.0319781	No	0.272654	No	NA	NA	NA	-0.125918	Stabilizer
MLX	bHLH	10	Yes	0.00077247	No	0.354168	NA	0.0765461	No	0.243298	No	0.070312	-6.91691	No	0.281264	Destabilizer
ARX	Homeodomain	10	Yes	0.0013349	Yes	0.0662553	Major	0.0471152	No	0.250039	No	0.0185792	-0.0475203	No	-0.167153	Stabilizer
PAX1	PAX	9.5	Yes	0.000716901	No	-0.869649	NA	0.0657463	No	0.247342	No	0.0267966	-1.18692	No	-0.100808	Stabilizer
GSX2	Homeodomain	9.5	Yes	0.0019893	Yes	-0.526363	Minor	0.0913391	No	0.25488	No	0.0258573	-0.145465	No	0.172251	Destabilizer
FLI1	ETS	9.5	Yes	0.00167287	Yes	-0.791567	Minor	0.0434891	No	0.245625	No	0.0800912	-6.12224	No	-0.363226	Stabilizer
EVX2	Homeodomain	9.5	Yes	0.00138041	Yes	-0.169883	Major	0.0478129	No	0.248652	No	0.0296448	-2.22	No	-0.0692557	Stabilizer
PAX2	PAX	9.5	Yes	0.000634352	No	-0.741339	NA	0.0281914	No	0.242807	No	0.0346952	-3.29	No	-0.0368381	Stabilizer
T	T_box	9.5	Yes	0.00188374	Yes	-0.0146861	Major	0.069976	No	0.33942	Yes	0.104799	-0.311	No	-0.0800554	Stabilizer
HOXD10	Homeodomain	9	Yes	0.00192949	Yes	-0.534485	Minor	0.115889	No	0.25176	No	0.0357452	-0.746	No	0.0393333	Destabilizer
NFATC2	RHD	9	Yes	0.00356551	Yes	-0.757993	Minor	0.125102	No	0.224242	No	0.0624556	-8.29	No	-0.100493	Stabilizer
ATF3	bZIP	9	Yes	0.000403673	No	0.400441	NA	0.052206	No	0.246482	No	0.0677546	-3.47	No	0.286267	Destabilizer
POU4F3	POU	9	Yes	0.00052233	No	-0.777222	NA	0.0325799	No	0.249029	No	0.0149399	-1.63e-08	No	-0.0339019	Stabilizer
ERG	ETS	9	Yes	0.00200703	Yes	-0.78405	Minor	0.0778453	No	0.256035	No	0.109102	-6.27821	Yes	-0.122532	Stabilizer
ATF2	bZIP	8.5	Yes	0.00024562	No	-0.900782	NA	0.0569677	No	0.249657	No	0.0663011	-10.0565	No	0.392598	Destabilizer
RFX4	RFX	8.5	Yes	0.000454672	No	0.863218	NA	0.0719621	No	0.25417	No	0.105545	-14.9728	Yes	-0.119596	Stabilizer
POU2F3	POU	8.5	Yes	0.000261368	No	-0.864399	NA	0.0256714	No	0.254607	No	NA	NA	NA	-0.289892	Stabilizer
HSF1	HSF	8.5	Yes	0.000632318	No	-0.655383	NA	0.0444551	No	0.248878	No	0.0245953	-0.0875625	No	0.0252485	Destabilizer
SOHLH2	bHLH	8.5	Yes	0.000562013	No	-0.993711	NA	0.0511254	No	0.244673	No	0.037813	-4.16183	No	0.115673	Destabilizer
GATA3	Znf_GATA	8.5	Yes	0.00079317	No	-0.160456	NA	0.0232134	No	0.245841	No	NA	NA	NA	0.278097	Destabilizer
MAFA	bZIP	8	Yes	0.000194379	No	-0.436413	NA	0.0131467	No	0.250605	No	0.120214	-13.2	Yes	-0.249964	Stabilizer
CREB5	bZIP	8	Yes	0.000799931	No	0.379562	NA	0.0866011	No	0.24765	No	0.0786987	-7.75	No	-0.0953025	Stabilizer
CREB3L1	bZIP	8	Yes	0.0010137	Yes	-0.960421	Minor	0.0324705	No	0.245863	No	0.0524087	-4.62	No	-0.0425911	Stabilizer
GATA6	Znf_GATA	8	Yes	0.00171696	Yes	0.142702	Major	0.00914507	No	0.242673	No	NA	NA	NA	0.118627	Destabilizer
TFEB	bHLH	8	Yes	0.00155496	Yes	-0.79923	Minor	0.00480322	No	0.235432	No	0.045249	-3.38	No	-0.199717	Stabilizer
TCF12	bHLH	8	Yes	0.00144156	Yes	-0.837163	Minor	0.0121654	No	0.243066	No	NA	NA	NA	-0.202726	Stabilizer
ETV4	ETS	8	Yes	0.00181737	Yes	-0.879876	Minor	0.149066	No	0.232839	No	0.0606539	-5.53e-10	No	-0.278626	Stabilizer
GSX1	Homeodomain	8	Yes	0.00277776	Yes	-0.646032	Minor	0.0273809	No	0.255901	No	0.0215366	-0.000652	No	0.278741	Destabilizer
XBP1	bZIP	8	Yes	0.000658885	No	-0.732854	NA	0.081138	No	0.242024	No	0.060004	-3.73	No	0.106058	Destabilizer
FIGLA	bHLH	8	Yes	0.000471252	No	-0.915242	NA	0.0644144	No	0.247264	No	0.0422765	-5.65e-07	No	NA	NA
CREB3L4	bZIP	7.5	Yes	0.000623158	No	0.670376	NA	0.0407164	No	0.242897	No	0.0422057	-1.19626	No	0.161642	Destabilizer
JUND	bZIP	7.5	Yes	0.00104826	Yes	0.1315	Major	0.103952	No	0.249248	No	0.0567068	-0.20818	No	0.244158	Destabilizer
POU1F1	POU	7.5	Yes	0.00111121	Yes	-0.837725	Minor	0.0292277	No	0.252475	No	0.0426472	-3.19318	No	-0.130906	Stabilizer
ELF5	ETS	7.5	Yes	0.00132356	Yes	-0.811321	Minor	0.0335147	No	0.244981	No	0.104218	-5.76608	Yes	-0.0791636	Stabilizer
GLI3	Znf_C2H2	7.5	Yes	0.00170796	Yes	-0.222965	Major	0.0509849	No	0.245788	No	0.0364556	-0.12822	No	NA (SBP)	NA (SBP)
SPIB	ETS	7.5	Yes	0.00102023	Yes	-0.904379	Minor	0.0694009	No	0.249224	No	NA	NA	NA	-0.23803	Stabilizer
ZGLP1	Znf_GATA	7.5	Yes	0.00280613	Yes	0.066195	Major	0.0733005	No	0.319792	Yes	NA	NA	NA	NA	NA
POU4F1	POU	7.5	Yes	0.000585123	No	-0.7106	NA	0.0197466	No	0.250191	No	NA	NA	NA	NA	NA
ETV5	ETS	7	Yes	0.00183322	Yes	-0.82773	Minor	0.0487784	No	0.271321	No	0.169767	-8.73392	Yes	-0.130111	Stabilizer
ZIC1	Znf_C2H2	7	Yes	0.000664	No	0.973036	NA	0.11357	No	0.249296	No	0.0354873	-0.000793128	No	0.172061	Destabilizer
RFX2	RFX	7	Yes	0.000573	No	-0.433753	NA	0.092042	No	0.245482	No	0.0692536	-7.39835	No	0.142586	Destabilizer
TFAP4	bHLH	7	Yes	0.00114	Yes	-0.848801	Minor	0.013951	No	0.238927	No	NA	NA	NA	-0.121269	Stabilizer
ETV1	ETS	7	Yes	0.0011	Yes	-0.85156	Minor	0.153524	No	0.254257	No	0.087465	-0.00024149	No	-0.354458	Stabilizer
CREB1	bZIP	7	Yes	0.000612	No	0.472494	NA	0.0506787	No	0.248213	No	0.117293	-10.8256	Yes	0.358414	Destabilizer
RFX1	RFX	7	Yes	0.000627	No	-0.676701	NA	0.0770582	No	0.250733	No	0.0449402	-2.6942	No	0.385675	Destabilizer
MAF	bZIP	7	Yes	5.62e-05	No	-0.00871427	NA	0.0310679	No	0.251456	No	0.065273	-5.02902	No	0.00227509	Destabilizer
CLOCK	bHLH	7	Yes	0.00216133	Yes	-0.802365	Minor	0.0406733	No	0.241754	No	0.0423451	-1.44176	No	0.145015	Destabilizer
TFE3	bHLH	7	Yes	0.000655868	No	0.396722	NA	0.0270082	No	0.235914	No	0.0612372	-4.69154	No	0.179612	Destabilizer
TCF4	bHLH	7	Yes	0.000973001	Yes	-0.580869	Minor	0.0348498	No	0.246472	No	NA	NA	NA	-0.196352	Stabilizer
MAFG	bZIP	7	Yes	0.000369272	No	0.051456	NA	0.0728565	No	0.248949	No	0.0530468	-4.2721	No	0.191261	Destabilizer
JUND2	bZIP	7	Yes	0.000652645	No	0.707078	NA	0.0587154	No	0.246449	No	0.0972795	-8.3276	No	0.153666	Destabilizer
NKX2-4	Homeodomain	6.5	Yes	0.000311873	No	-0.996678	NA	0.0213454	No	0.243331	No	NA	NA	NA	-0.0780519	Stabilizer
CREM	bZIP	6.5	Yes	0.000799012	No	0.901587	NA	0.0236522	No	0.24226	No	0.0278023	-0.000524539	No	-0.169349	Stabilizer
HOXC10	Homeodomain	6.5	Yes	0.00134002	Yes	-0.322625	Major	0.144001	No	0.255644	No	0.0488433	-3.93654	No	0.194672	Destabilizer
MYCN	bHLH	6.5	Yes	0.00136932	Yes	-0.906085	Minor	0.0508085	No	0.245098	No	NA	NA	NA	NA	NA
SREBF1	bHLH	6	Yes	0.00195279	Yes	-0.88527	Minor	0.0166501	No	0.245711	No	0.0446643	-2.75804	No	-0.394712	Stabilizer
HSF4	HSF	6	Yes	0.00034567	No	-0.751011	NA	0.0480643	No	0.248915	No	0.0207087	-0.00265354	No	-0.0184034	Stabilizer
SREBF2	bHLH	6	Yes	0.00193428	Yes	-0.87545	Minor	0.00899356	No	0.271327	No	0.0911127	-7.39651	No	-0.0533058	Stabilizer
POU2F2	POU	6	Yes	0.00103457	Yes	-0.87815	Minor	0.0519579	No	0.268291	No	0.0221152	-0.609821	No	-0.10437	Stabilizer
ELK3	ETS	6	Yes	0.00278893	Yes	-0.817455	Minor	0.0131471	No	0.248375	No	0.111014	-2.39946	No	-0.0995823	Stabilizer
CEBPE	bZIP	6	Yes	0.000897965	No	-0.90959	NA	0.0226162	No	0.251903	No	0.0322479	-3.67621	No	0.161301	Destabilizer
TFEC	bHLH	6	Yes	0.000489925	No	0.88742	NA	0.0741475	No	0.251421	No	0.0262674	-1.06065	No	-0.25249	Stabilizer
CEBPB	bZIP	6	Yes	0.0009314	No	-0.964768	NA	0.0272677	No	0.252137	No	0.0542889	-4.7229	No	0.11749	Destabilizer
ZIC4	Znf_C2H2	6	Yes	0.00252931	Yes	-0.817283	Minor	0.0354537	No	0.240032	No	NA	NA	NA	NA	NA
POU3F2	POU	5.5	Yes	0.00095868	No	-0.86119	NA	0.110486	No	0.252495	No	0.0374985	-1.84278	No	0.048102	Destabilizer
RFX3	RFX	5.5	Yes	0.000541738	No	0.90981	NA	0.107154	No	0.249814	No	0.0389713	-3.11	No	-0.0925627	Stabilizer
HOXD12	Homeodomain	5.5	Yes	0.00189696	Yes	-0.491518	Major	0.136697	No	0.250624	No	0.0247665	-0.000388	No	NA	NA
DUXA	Homeodomain	5	Yes	-0.00059111	No	0.923652	NA	0.0391575	No	0.247259	No	0.0273327	-0.0946	No	-0.297782	Stabilizer
SOX9	HMG	NA	NA	NA	NA	NA	NA	NA	NA	NA	NA	0.0579398	-0.787	No	NA	NA
ZNF597	Znf_C2H2	NA	NA	NA	NA	NA	NA	NA	NA	NA	NA	0.201394	-18.2	Yes	NA	NA
E2F4	E2F	NA	NA	NA	NA	NA	NA	NA	NA	NA	NA	0.0357224	-0.0283	No	NA	NA
UBP1	CP2	NA	NA	NA	NA	NA	NA	NA	NA	NA	NA	0.0163011	-5.74e-06	No	NA	NA
BSX	Homeodomain	NA	NA	NA	NA	NA	NA	NA	NA	NA	NA	0.028368	-2.99e-05	No	NA	NA
ZNF32	Znf_C2H2	NA	NA	NA	NA	NA	NA	NA	NA	NA	NA	0.0201318	-0.0952	No	NA	NA
ZIC3	Znf_C2H2	NA	NA	NA	NA	NA	NA	NA	NA	NA	NA	0.0911451	-4.78	No	NA	NA
TCF15	bHLH	NA	NA	NA	NA	NA	NA	NA	NA	NA	NA	0.0203426	-9.98e-06	No	NA	NA
ATF4	bZIP	NA	NA	NA	NA	NA	NA	NA	NA	NA	NA	0.0610797	-6.22	No	NA	NA
TFCP2L1	CP2	NA	NA	NA	NA	NA	NA	NA	NA	NA	NA	0.0167974	-3.52e-08	No	NA	NA
ZNF524	Znf_C2H2	NA	NA	NA	NA	NA	NA	NA	NA	NA	NA	0.026068	-0.326	No	NA	NA
ISX	Homeodomain	NA	NA	NA	NA	NA	NA	NA	NA	NA	NA	0.0140287	-2.56e-06	No	NA	NA
SNAI2	Znf_C2H2	NA	NA	NA	NA	NA	NA	NA	NA	NA	NA	0.0236657	-3.05e-05	No	NA	NA
HOXB5	Homeodomain	NA	NA	NA	NA	NA	NA	NA	NA	NA	NA	0.0204719	-6.26e-07	No	NA	NA
OVOL1	Znf_C2H2	NA	NA	NA	NA	NA	NA	NA	NA	NA	NA	0.0384962	-3.74	No	NA	NA
HOXD13	Homeodomain	NA	NA	NA	NA	NA	NA	NA	NA	NA	NA	0.0200006	-6.19e-06	No	NA	NA
SOX3	HMG	NA	NA	NA	NA	NA	NA	NA	NA	NA	NA	0.0201866	-3.32e-07	No	NA	NA
SNAI1	Znf_C2H2	NA	NA	NA	NA	NA	NA	NA	NA	NA	NA	0.041967	-0.68	No	NA	NA
RHOXF1	Homeodomain	NA	NA	NA	NA	NA	NA	NA	NA	NA	NA	0.0186435	-1.42e-08	No	NA	NA
KLF13	Znf_C2H2	NA	NA	NA	NA	NA	NA	NA	NA	NA	NA	0.106609	-2.43e-05	No	NA	NA
PKNOX1	MEIS	NA	NA	NA	NA	NA	NA	NA	NA	NA	NA	0.0217272	-0.273	No	NA	NA
PAX5	PAX	NA	NA	NA	NA	NA	NA	NA	NA	NA	NA	0.0258617	-0.0142	No	NA	NA
TFCP2	CP2	NA	NA	NA	NA	NA	NA	NA	NA	NA	NA	0.025085	-0.0626	No	NA	NA
FOSB	bZIP	NA	NA	NA	NA	NA	NA	NA	NA	NA	NA	0.0255975	-5.98e-06	No	NA	NA
OVOL2	Znf_C2H2	NA	NA	NA	NA	NA	NA	NA	NA	NA	NA	0.0439042	-1.67997	No	NA	NA
NEUROG1	bHLH	NA	NA	NA	NA	NA	NA	NA	NA	NA	NA	0.0259303	-0.00596966	No	NA	NA
ZNF821	Znf_C2H2	NA	NA	NA	NA	NA	NA	NA	NA	NA	NA	0.0259129	-0.0742	No	NA	NA
HSF2	HSF	NA	NA	NA	NA	NA	NA	NA	NA	NA	NA	0.0207818	-0.000286	No	NA	NA
IRF7	IRF	NA	NA	NA	NA	NA	NA	NA	NA	NA	NA	0.0344169	-0.805	No	NA	NA
YY1	Znf_C2H2	NA	NA	NA	NA	NA	NA	NA	NA	NA	NA	0.240821	-17.4	Yes	NA	NA
SOX4	HMG	NA	NA	NA	NA	NA	NA	NA	NA	NA	NA	0.044516	-0.131	No	NA	NA
HELT	bHLH	NA	NA	NA	NA	NA	NA	NA	NA	NA	NA	0.0215936	-0.000299	No	NA	NA
HOXA9	Homeodomain	NA	NA	NA	NA	NA	NA	NA	NA	NA	NA	0.0179588	-3.92e-09	No	NA	NA
KLF12	Znf_C2H2	NA	NA	NA	NA	NA	NA	NA	NA	NA	NA	0.026213	-2.95e-06	No	NA	NA
PROX2	Homeodomain	NA	NA	NA	NA	NA	NA	NA	NA	NA	NA	0.023821	-2.95e-05	No	NA	NA
SOX8	HMG	NA	NA	NA	NA	NA	NA	NA	NA	NA	NA	0.083925	-1.58	No	NA	NA
CTCF	Znf_C2H2	NA	NA	NA	NA	NA	NA	NA	NA	NA	NA	0.0232248	-2.01e-10	No	NA	NA
