# Supplementary material for: Detection of new pioneer transcription factors as cell-type-specific nucleosome binders
Source: eLife. 2024 Jan 31;12:RP88936. doi: 10.7554/eLife.88936 (PMC10945518; doi:10.7554/eLife.88936)
Supplement: Figure 4—source data 1. [file elife-88936-fig4-data1.xlsx]

## Sheet: cluster1
binding_sites	HES1_K562	MEF2A_K562	PKNOX1_K562	RREB1_K562	TBX18_K562	ZNF24_K562	CTCF_HepG2	NFIB_HepG2	RFX3_HepG2	SP1_HepG2	SP2_HepG2	ZBTB14_HepG2	MAFK_HeLaS3	REST_HeLaS3	EGR1_MCF7	ESR1_MCF7	KLF9_MCF7	MAZ_MCF7	NFIB_MCF7	RFX1_MCF7	ZBTB7B_MCF7	EGR1_H1
0	0.173913	0.228571	0.283951	0.0980392	0.428571	0.0242131	0.226611	0.27907	0.214286	0.225806	0.276923	0.327586	0.165468	0.21875	0.128378	0.133588	0.1075	0.567251	0.0587808	0.205575	0.133333	0.465116
1	0.173913	0.185714	0.290123	0.0686275	0.5	0.0157385	0.238046	0.197674	0.27381	0.182796	0.261538	0.336207	0.197842	0.234375	0.0945946	0.160305	0.13625	0.55848	0.0511611	0.207317	0.177778	0.357558
2	0.108696	0.214286	0.308642	0.0686275	0.464286	0.0230024	0.227651	0.162791	0.27381	0.263441	0.269231	0.482759	0.226619	0.338542	0.097973	0.139313	0.12625	0.555556	0.0395501	0.189895	0.188889	0.337209
3	0.152174	0.157143	0.296296	0.0686275	0.428571	0.0326877	0.272349	0.209302	0.22619	0.247312	0.338462	0.491379	0.327338	0.348958	0.10473	0.137405	0.125	0.48538	0.0504354	0.1777	0.188889	0.281977
4	0.130435	0.142857	0.283951	0.0588235	0.464286	0.0435835	0.27027	0.244186	0.345238	0.215054	0.307692	0.525862	0.320144	0.348958	0.135135	0.125954	0.12875	0.502924	0.0522496	0.0923345	0.188889	0.270349
5	0.0869565	0.114286	0.296296	0.0294118	0.392857	0.0435835	0.255717	0.255814	0.27381	0.193548	0.284615	0.5	0.334532	0.28125	0.114865	0.0858779	0.1275	0.429825	0.0264877	0.0888502	0.188889	0.206395
6	0.0869565	0.114286	0.351852	0.0588235	0.25	0.0375303	0.264033	0.302326	0.321429	0.188172	0.338462	0.422414	0.302158	0.328125	0.114865	0.104962	0.14	0.383041	0.046807	0.109756	0.133333	0.212209
7	0.130435	0.114286	0.364198	0.107843	0.285714	0.059322	0.284823	0.325581	0.321429	0.198925	0.284615	0.353448	0.291367	0.369792	0.0777027	0.150763	0.095	0.312865	0.0533382	0.139373	0.166667	0.148256
8	0.0652174	0.185714	0.419753	0.127451	0.285714	0.0932203	0.313929	0.337209	0.25	0.123656	0.292308	0.431034	0.280576	0.369792	0.0743243	0.192748	0.0975	0.295322	0.0674891	0.195122	0.188889	0.22093
9	0.0869565	0.185714	0.425926	0.147059	0.357143	0.0859564	0.324324	0.348837	0.261905	0.0806452	0.292308	0.362069	0.269784	0.302083	0.0405405	0.217557	0.07125	0.283626	0.0838171	0.186411	0.222222	0.180233
10	0.0869565	0.228571	0.407407	0.186275	0.285714	0.0472155	0.274428	0.337209	0.321429	0.0806452	0.346154	0.362069	0.302158	0.276042	0.0574324	0.185115	0.09625	0.192982	0.0776488	0.231707	0.3	0.162791
11	0.0869565	0.257143	0.419753	0.215686	0.285714	0.0581114	0.258836	0.337209	0.333333	0.11828	0.284615	0.396552	0.327338	0.161458	0.10473	0.146947	0.09375	0.160819	0.0972424	0.278746	0.288889	0.139535
12	0.0434783	0.2	0.376543	0.22549	0.178571	0.094431	0.232848	0.348837	0.404762	0.134409	0.269231	0.387931	0.363309	0.182292	0.14527	0.145038	0.11	0.105263	0.110305	0.334495	0.288889	0.145349
13	0.0652174	0.185714	0.395062	0.22549	0.178571	0.0702179	0.172557	0.383721	0.47619	0.134409	0.238462	0.37069	0.413669	0.135417	0.114865	0.101145	0.10375	0.0701754	0.120464	0.297909	0.266667	0.142442
14	0.108696	0.185714	0.364198	0.196078	0.178571	0.0556901	0.144491	0.453488	0.452381	0.166667	0.153846	0.301724	0.456835	0.140625	0.121622	0.0744275	0.12625	0.116959	0.118287	0.289199	0.277778	0.151163
15	0.108696	0.171429	0.296296	0.156863	0.142857	0.0363196	0.14657	0.5	0.428571	0.123656	0.223077	0.25	0.492806	0.1875	0.158784	0.0248092	0.165	0.0906433	0.142598	0.303136	0.3	0.18314
16	0.108696	0.2	0.259259	0.127451	0.285714	0.0581114	0.150728	0.534884	0.452381	0.129032	0.146154	0.241379	0.5	0.213542	0.125	0.0973282	0.1175	0.0906433	0.159289	0.317073	0.355556	0.188953
17	0.130435	0.114286	0.271605	0.117647	0.285714	0.0375303	0.182952	0.488372	0.428571	0.139785	0.153846	0.275862	0.47482	0.192708	0.121622	0.179389	0.15375	0.108187	0.156023	0.355401	0.422222	0.247093
18	0.0652174	0.157143	0.290123	0.127451	0.214286	0.031477	0.196466	0.476744	0.416667	0.129032	0.184615	0.232759	0.413669	0.140625	0.141892	0.225191	0.13625	0.154971	0.156386	0.334495	0.4	0.296512
19	0.0869565	0.171429	0.265432	0.117647	0.214286	0.0411622	0.242204	0.465116	0.333333	0.145161	0.0846154	0.0948276	0.399281	0.177083	0.168919	0.284351	0.13375	0.166667	0.182874	0.303136	0.344444	0.334302
20	0.195652	0.214286	0.290123	0.166667	0.107143	0.0883777	0.241164	0.476744	0.321429	0.150538	0.0923077	0.137931	0.438849	0.244792	0.216216	0.30916	0.13125	0.157895	0.181785	0.294425	0.288889	0.377907
21	0.217391	0.242857	0.277778	0.156863	0.142857	0.0520581	0.237006	0.406977	0.392857	0.188172	0.0923077	0.241379	0.438849	0.244792	0.233108	0.30916	0.12375	0.190058	0.215893	0.259582	0.266667	0.325581
22	0.26087	0.3	0.339506	0.186275	0.107143	0.0508475	0.180873	0.383721	0.285714	0.193548	0.123077	0.301724	0.420863	0.244792	0.266892	0.276718	0.16375	0.184211	0.263425	0.259582	0.311111	0.276163
23	0.326087	0.214286	0.345679	0.166667	0.142857	0.0774818	0.160083	0.453488	0.190476	0.172043	0.107692	0.431034	0.431655	0.270833	0.246622	0.196565	0.16625	0.25731	0.293179	0.1777	0.3	0.258721
24	0.304348	0.2	0.314815	0.186275	0.178571	0.161017	0.158004	0.383721	0.190476	0.22043	0.123077	0.336207	0.417266	0.28125	0.226351	0.0916031	0.21625	0.298246	0.291364	0.116725	0.311111	0.252907
25	0.347826	0.157143	0.376543	0.176471	0.214286	0.127119	0.168399	0.302326	0.166667	0.263441	0.169231	0.318966	0.384892	0.28125	0.22973	0.0725191	0.215	0.266082	0.298258	0.111498	0.388889	0.305233
26	0.326087	0.1	0.364198	0.166667	0.214286	0.116223	0.134096	0.209302	0.154762	0.252688	0.153846	0.318966	0.377698	0.369792	0.233108	0.21374	0.20875	0.254386	0.327649	0.144599	0.4	0.258721
27	0.369565	0.185714	0.32716	0.176471	0.214286	0.118644	0.154886	0.22093	0.142857	0.215054	0.161538	0.267241	0.345324	0.322917	0.243243	0.353053	0.17875	0.304094	0.339623	0.132404	0.388889	0.348837
28	0.413043	0.214286	0.314815	0.186275	0.285714	0.197337	0.169439	0.244186	0.154762	0.258065	0.192308	0.396552	0.309353	0.260417	0.266892	0.412214	0.16125	0.324561	0.359942	0.142857	0.311111	0.299419
29	0.521739	0.242857	0.358025	0.205882	0.321429	0.209443	0.203742	0.197674	0.202381	0.252688	0.238462	0.413793	0.320144	0.229167	0.297297	0.490458	0.13625	0.274854	0.37627	0.19338	0.366667	0.357558
30	0.586957	0.285714	0.37037	0.215686	0.357143	0.2046	0.209979	0.244186	0.166667	0.290323	0.276923	0.508621	0.258993	0.229167	0.327703	0.532443	0.09375	0.251462	0.387155	0.229965	0.4	0.252907
31	0.586957	0.328571	0.388889	0.254902	0.392857	0.220339	0.214137	0.325581	0.238095	0.263441	0.369231	0.456897	0.273381	0.223958	0.337838	0.484733	0.14	0.27193	0.40312	0.235192	0.377778	0.30814
32	0.565217	0.357143	0.407407	0.27451	0.428571	0.266344	0.194387	0.360465	0.285714	0.177419	0.330769	0.405172	0.280576	0.307292	0.364865	0.534351	0.125	0.292398	0.413643	0.292683	0.333333	0.299419
33	0.608696	0.342857	0.376543	0.343137	0.464286	0.242131	0.180873	0.360465	0.333333	0.231183	0.376923	0.353448	0.31295	0.317708	0.368243	0.446565	0.12125	0.318713	0.396952	0.3223	0.322222	0.337209
34	0.521739	0.3	0.419753	0.362745	0.5	0.291768	0.165281	0.406977	0.309524	0.247312	0.423077	0.198276	0.251799	0.369792	0.418919	0.370229	0.12	0.321637	0.398041	0.301394	0.311111	0.351744
35	0.565217	0.3	0.364198	0.382353	0.5	0.307506	0.191268	0.348837	0.392857	0.274194	0.453846	0.172414	0.201439	0.34375	0.469595	0.307252	0.1	0.345029	0.417997	0.304878	0.366667	0.444767
36	0.521739	0.285714	0.283951	0.382353	0.571429	0.354722	0.260915	0.313953	0.488095	0.263441	0.515385	0.241379	0.226619	0.333333	0.533784	0.347328	0.11	0.467836	0.449565	0.30662	0.344444	0.465116
37	0.413043	0.257143	0.166667	0.401961	0.535714	0.297821	0.327443	0.337209	0.47619	0.247312	0.469231	0.275862	0.197842	0.348958	0.543919	0.383588	0.1175	0.450292	0.463353	0.325784	0.322222	0.485465
38	0.326087	0.342857	0.148148	0.441176	0.464286	0.340194	0.367983	0.360465	0.488095	0.290323	0.569231	0.327586	0.215827	0.307292	0.581081	0.438931	0.19625	0.511696	0.498549	0.318815	0.4	0.476744
39	0.304348	0.357143	0.222222	0.441176	0.464286	0.386199	0.404366	0.325581	0.511905	0.27957	0.561538	0.284483	0.208633	0.3125	0.641892	0.490458	0.16	0.564327	0.540639	0.364111	0.411111	0.56686
40	0.217391	0.457143	0.296296	0.490196	0.428571	0.449153	0.41684	0.418605	0.619048	0.268817	0.484615	0.310345	0.223022	0.307292	0.706081	0.540076	0.19125	0.619883	0.572932	0.449477	0.366667	0.552326
41	0.130435	0.614286	0.277778	0.509804	0.357143	0.395884	0.43659	0.406977	0.702381	0.268817	0.461538	0.301724	0.280576	0.354167	0.702703	0.540076	0.2025	0.74269	0.622642	0.489547	0.388889	0.671512
42	0.195652	0.7	0.37037	0.578431	0.392857	0.40678	0.414761	0.395349	0.654762	0.301075	0.492308	0.37069	0.320144	0.395833	0.689189	0.473282	0.25875	0.809942	0.620102	0.482578	0.511111	0.665698
43	0.217391	0.742857	0.395062	0.588235	0.428571	0.430993	0.411642	0.406977	0.690476	0.344086	0.453846	0.405172	0.431655	0.427083	0.685811	0.349237	0.28625	0.839181	0.615747	0.533101	0.511111	0.755814
44	0.23913	0.7	0.425926	0.568627	0.464286	0.486683	0.409563	0.44186	0.72619	0.349462	0.438462	0.491379	0.431655	0.442708	0.695946	0.246183	0.30875	0.824561	0.62881	0.595819	0.644444	0.709302
45	0.347826	0.671429	0.481481	0.558824	0.464286	0.443099	0.417879	0.662791	0.761905	0.311828	0.507692	0.586207	0.514388	0.557292	0.736486	0.187023	0.3375	0.847953	0.699202	0.625436	0.7	0.761628
46	0.391304	0.628571	0.555556	0.647059	0.392857	0.449153	0.460499	0.709302	0.738095	0.397849	0.469231	0.577586	0.492806	0.635417	0.719595	0.120229	0.38	0.853801	0.759797	0.66899	0.777778	0.767442
47	0.326087	0.728571	0.67284	0.666667	0.285714	0.46368	0.538462	0.744186	0.845238	0.397849	0.484615	0.62931	0.507194	0.619792	0.726351	0.127863	0.385	0.853801	0.805878	0.743902	0.711111	0.81686
48	0.413043	0.828571	0.734568	0.696078	0.321429	0.549637	0.586279	0.744186	0.797619	0.430108	0.507692	0.681034	0.482014	0.583333	0.777027	0.244275	0.45625	0.921053	0.831277	0.824042	0.788889	0.875
49	0.478261	0.885714	0.734568	0.666667	0.357143	0.513317	0.658004	0.767442	0.761905	0.5	0.584615	0.741379	0.629496	0.619792	0.72973	0.303435	0.5325	0.894737	0.887518	0.874564	0.777778	0.909884
50	0.565217	0.914286	0.746914	0.696078	0.285714	0.529056	0.720374	0.848837	0.869048	0.537634	0.523077	0.775862	0.723022	0.635417	0.756757	0.324427	0.6	0.865497	0.894049	0.937282	0.888889	0.962209
51	0.5	0.957143	0.783951	0.745098	0.392857	0.565375	0.74948	0.77907	0.869048	0.516129	0.515385	0.75	0.780576	0.734375	0.743243	0.343511	0.655	0.903509	0.895138	0.919861	0.944444	0.976744
52	0.586957	0.942857	0.895062	0.764706	0.428571	0.644068	0.748441	0.72093	0.845238	0.521505	0.515385	0.732759	0.881295	0.817708	0.699324	0.341603	0.7	0.885965	0.910377	0.872822	0.933333	0.924419
53	0.586957	0.928571	0.932099	0.803922	0.464286	0.598063	0.731809	0.697674	0.761905	0.537634	0.5	0.810345	0.845324	0.692708	0.682432	0.255725	0.66875	0.827485	0.867562	0.824042	0.911111	0.959302
54	0.586957	0.9	0.888889	0.823529	0.464286	0.617433	0.725572	0.662791	0.75	0.543011	0.515385	0.793103	0.848921	0.645833	0.658784	0.167939	0.7275	0.853801	0.820029	0.801394	0.933333	0.915698
55	0.565217	0.8	0.820988	0.852941	0.5	0.684019	0.674636	0.593023	0.77381	0.521505	0.415385	0.741379	0.776978	0.640625	0.689189	0.0877863	0.73875	0.900585	0.749637	0.745645	0.9	0.906977
56	0.673913	0.642857	0.932099	0.843137	0.535714	0.822034	0.656965	0.616279	0.72619	0.505376	0.446154	0.75	0.71223	0.682292	0.712838	0.148855	0.75	0.921053	0.761248	0.658537	0.9	0.863372
57	0.521739	0.5	0.919753	0.823529	0.75	0.765133	0.514553	0.651163	0.75	0.494624	0.476923	0.836207	0.669065	0.604167	0.726351	0.368321	0.77875	0.926901	0.890784	0.618467	0.833333	0.898256
58	0.5	0.4	0.87037	0.813725	0.785714	0.762712	0.385655	0.604651	0.738095	0.403226	0.615385	0.732759	0.625899	0.515625	0.648649	0.814885	0.8	0.906433	0.841074	0.543554	0.888889	0.857558
59	0.521739	0.471429	0.888889	0.843137	0.785714	0.831719	0.259875	0.534884	0.738095	0.623656	0.715385	0.706897	0.719424	0.494792	0.60473	0.891221	0.81375	0.944444	0.695573	0.437282	0.844444	0.805233
60	0.521739	0.457143	0.901235	0.784314	0.714286	0.953995	0.189189	0.546512	0.595238	0.795699	0.815385	0.681034	0.68705	0.427083	0.513514	0.782443	0.8725	0.932749	0.565312	0.351916	0.833333	0.758721

## Sheet: cluster2
binding_sites	IRF1_K562	ZNF384_K562	CREB3_HepG2	E2F2_HepG2	ELK1_HepG2	KLF11_HepG2	MIXL1_HepG2	ZNF384_HepG2	ZNF740_HepG2	E2F6_HeLaS3	CEBPB_MCF7	CEBPG_MCF7	KLF4_MCF7	MAX_MCF7	ZNF24_MCF7	E2F6_H1	ZNF143_H1
0	0.0555556	0.0115296	0	0	0.285714	0.357143	0.607143	0.00189484	0.468531	0.277108	0	0.0638298	0.418605	0.205479	0.0586667	0.198347	0
1	0.0679012	0.0176787	0	0	0.214286	0.482143	0.571429	0.00307911	0.531469	0.246988	0.120192	0.0771277	0.4	0.116438	0.0253333	0.208678	0.0511364
2	0.0925926	0.038432	0	0	0.178571	0.375	0.535714	0.013027	0.48951	0.23494	0.149038	0.119681	0.367442	0.184932	0.0493333	0.140496	0.0681818
3	0.0833333	0.0684089	0.0416667	0	0.178571	0.392857	0.517857	0.0296068	0.48951	0.23494	0.230769	0.220745	0.344186	0.232877	0.0426667	0.146694	0.0852273
4	0.0833333	0.106072	0.125	0.0555556	0.178571	0.303571	0.517857	0.0485552	0.423077	0.228916	0.245192	0.281915	0.3	0.267123	0.0946667	0.11157	0.107955
5	0.0555556	0.145273	0.166667	0.0555556	0.107143	0.392857	0.535714	0.0712932	0.363636	0.295181	0.262019	0.194149	0.3	0.10274	0.1	0.0764463	0.136364
6	0.0740741	0.192544	0.208333	0.0555556	0.178571	0.428571	0.535714	0.0963998	0.342657	0.240964	0.34375	0.292553	0.339535	0.123288	0.124	0.130165	0.119318
7	0.0432099	0.234435	0.208333	0.0555556	0.107143	0.482143	0.535714	0.127191	0.335664	0.210843	0.360577	0.321809	0.304651	0.150685	0.096	0.18595	0.244318
8	0.108025	0.285934	0.25	0.0555556	0.142857	0.339286	0.410714	0.160114	0.367133	0.174699	0.447115	0.351064	0.206977	0.191781	0.16	0.219008	0.255682
9	0.123457	0.331284	0.25	0.166667	0.142857	0.339286	0.464286	0.193273	0.321678	0.240964	0.555288	0.375	0.197674	0.226027	0.168	0.266529	0.369318
10	0.145062	0.374327	0.291667	0.277778	0.178571	0.214286	0.464286	0.229986	0.325175	0.295181	0.485577	0.380319	0.211628	0.349315	0.194667	0.233471	0.357955
11	0.17284	0.411606	0.333333	0.277778	0.178571	0.339286	0.428571	0.262672	0.321678	0.259036	0.480769	0.388298	0.206977	0.321918	0.192	0.309917	0.357955
12	0.228395	0.441583	0.375	0.444444	0.214286	0.410714	0.428571	0.288489	0.321678	0.325301	0.4375	0.340426	0.227907	0.328767	0.257333	0.31405	0.375
13	0.200617	0.464258	0.458333	0.555556	0.357143	0.482143	0.303571	0.306016	0.314685	0.331325	0.574519	0.404255	0.3	0.335616	0.254667	0.36157	0.414773
14	0.265432	0.477709	0.541667	0.555556	0.321429	0.446429	0.232143	0.319754	0.241259	0.337349	0.622596	0.473404	0.318605	0.445205	0.28	0.365702	0.375
15	0.274691	0.488086	0.583333	0.611111	0.285714	0.464286	0.196429	0.331833	0.311189	0.343373	0.709135	0.422872	0.362791	0.568493	0.270667	0.369835	0.494318
16	0.314815	0.491545	0.583333	0.611111	0.285714	0.428571	0.196429	0.341544	0.304196	0.295181	0.759615	0.444149	0.383721	0.623288	0.346667	0.297521	0.494318
17	0.342593	0.489623	0.583333	0.611111	0.285714	0.428571	0.339286	0.347703	0.398601	0.337349	0.78125	0.5	0.383721	0.787671	0.333333	0.283058	0.5
18	0.361111	0.491929	0.541667	0.666667	0.214286	0.446429	0.303571	0.351018	0.43007	0.355422	0.769231	0.49734	0.4	0.650685	0.346667	0.342975	0.573864
19	0.382716	0.488086	0.458333	0.611111	0.357143	0.517857	0.285714	0.354098	0.48951	0.403614	0.771635	0.505319	0.446512	0.493151	0.364	0.392562	0.585227
20	0.376543	0.486164	0.458333	0.611111	0.428571	0.428571	0.375	0.366177	0.5	0.421687	0.798077	0.513298	0.486047	0.520548	0.446667	0.35124	0.596591
21	0.410494	0.480784	0.416667	0.611111	0.357143	0.535714	0.5	0.378967	0.503497	0.39759	0.689904	0.428191	0.483721	0.479452	0.425333	0.386364	0.579545
22	0.410494	0.477709	0.416667	0.611111	0.428571	0.678571	0.678571	0.394837	0.538462	0.439759	0.576923	0.324468	0.5	0.534247	0.436	0.280992	0.454545
23	0.438272	0.477325	0.5	0.722222	0.571429	0.571429	0.732143	0.421127	0.590909	0.373494	0.475962	0.305851	0.537209	0.527397	0.453333	0.278926	0.414773
24	0.459877	0.479247	0.458333	0.611111	0.607143	0.553571	0.714286	0.451682	0.618881	0.457831	0.319712	0.284574	0.548837	0.547945	0.521333	0.231405	0.375
25	0.453704	0.486164	0.541667	0.5	0.785714	0.5	0.696429	0.483894	0.65035	0.409639	0.28125	0.305851	0.55814	0.445205	0.485333	0.254132	0.369318
26	0.45679	0.488855	0.541667	0.555556	0.714286	0.517857	0.660714	0.520133	0.706294	0.445783	0.302885	0.332447	0.474419	0.253425	0.478667	0.216942	0.431818
27	0.478395	0.49462	0.458333	0.555556	0.821429	0.5	0.607143	0.556371	0.727273	0.451807	0.370192	0.348404	0.451163	0.39726	0.510667	0.256198	0.465909
28	0.533951	0.502306	0.458333	0.555556	0.714286	0.678571	0.607143	0.594742	0.695804	0.46988	0.524038	0.457447	0.506977	0.486301	0.569333	0.303719	0.4375
29	0.570988	0.508455	0.416667	0.555556	0.75	0.589286	0.553571	0.626243	0.699301	0.536145	0.538462	0.50266	0.553488	0.527397	0.518667	0.42562	0.465909
30	0.555556	0.513067	0.458333	0.555556	0.678571	0.482143	0.571429	0.654192	0.674825	0.548193	0.641827	0.582447	0.593023	0.486301	0.52	0.493802	0.482955
31	0.580247	0.517679	0.5	0.555556	0.642857	0.535714	0.535714	0.671483	0.681818	0.506024	0.704327	0.630319	0.613953	0.506849	0.534667	0.561983	0.522727
32	0.570988	0.524596	0.625	0.722222	0.571429	0.375	0.589286	0.679062	0.727273	0.524096	0.709135	0.619681	0.627907	0.479452	0.577333	0.592975	0.471591
33	0.540123	0.527287	0.583333	0.666667	0.535714	0.232143	0.607143	0.682378	0.702797	0.46988	0.78125	0.603723	0.618605	0.321918	0.528	0.595041	0.431818
34	0.617284	0.530361	0.541667	0.666667	0.321429	0.303571	0.625	0.68072	0.660839	0.572289	0.862981	0.651596	0.593023	0.431507	0.534667	0.547521	0.494318
35	0.614198	0.534204	0.583333	0.722222	0.428571	0.285714	0.660714	0.677167	0.625874	0.572289	0.800481	0.619681	0.613953	0.445205	0.542667	0.640496	0.494318
36	0.608025	0.537663	0.5	0.722222	0.392857	0.375	0.803571	0.67172	0.587413	0.686747	0.728365	0.651596	0.586047	0.410959	0.613333	0.642562	0.522727
37	0.589506	0.54535	0.625	0.722222	0.464286	0.392857	0.803571	0.666035	0.559441	0.590361	0.612981	0.547872	0.618605	0.376712	0.576	0.650826	0.607955
38	0.549383	0.548424	0.541667	0.611111	0.357143	0.392857	0.732143	0.658456	0.493007	0.578313	0.584135	0.49734	0.676744	0.410959	0.588	0.607438	0.693182
39	0.561728	0.550346	0.5	0.611111	0.5	0.339286	0.607143	0.657745	0.496503	0.542169	0.507212	0.470745	0.648837	0.472603	0.62	0.646694	0.75
40	0.570988	0.554573	0.541667	0.611111	0.392857	0.410714	0.553571	0.662956	0.503497	0.5	0.490385	0.468085	0.669767	0.486301	0.68	0.642562	0.778409
41	0.614198	0.565719	0.583333	0.555556	0.357143	0.571429	0.535714	0.668877	0.5	0.475904	0.504808	0.529255	0.690698	0.691781	0.66	0.677686	0.721591
42	0.611111	0.580323	0.666667	0.5	0.535714	0.446429	0.642857	0.678115	0.5	0.439759	0.439904	0.558511	0.672093	0.69863	0.678667	0.67562	0.744318
43	0.601852	0.602613	0.666667	0.388889	0.642857	0.696429	0.625	0.694931	0.479021	0.439759	0.420673	0.521277	0.688372	0.575342	0.708	0.64876	0.755682
44	0.635802	0.631053	0.666667	0.5	0.607143	0.803571	0.625	0.715301	0.517483	0.524096	0.367788	0.43617	0.695349	0.671233	0.78	0.578512	0.818182
45	0.654321	0.665257	0.583333	0.5	0.607143	0.75	0.5	0.742776	0.503497	0.463855	0.346154	0.364362	0.695349	0.547945	0.746667	0.605372	0.704545
46	0.716049	0.709454	0.625	0.555556	0.535714	0.785714	0.517857	0.779252	0.615385	0.524096	0.348558	0.428191	0.693023	0.616438	0.768	0.741736	0.6875
47	0.79321	0.760569	0.625	0.388889	0.571429	0.75	0.5	0.817385	0.688811	0.487952	0.382212	0.534574	0.772093	0.527397	0.776	0.818182	0.744318
48	0.756173	0.812836	0.625	0.611111	0.535714	0.678571	0.571429	0.853387	0.737762	0.566265	0.451923	0.574468	0.772093	0.636986	0.852	0.855372	0.744318
49	0.722222	0.85857	0.75	0.611111	0.607143	0.839286	0.642857	0.891284	0.737762	0.524096	0.490385	0.659574	0.769767	0.520548	0.790667	0.919421	0.732955
50	0.743827	0.898155	0.666667	0.666667	0.678571	0.714286	0.625	0.917338	0.751748	0.578313	0.533654	0.662234	0.765116	0.431507	0.790667	0.944215	0.727273
51	0.746914	0.928132	0.75	0.666667	0.535714	0.696429	0.571429	0.937707	0.874126	0.668675	0.634615	0.768617	0.795349	0.575342	0.808	0.940083	0.704545
52	0.709877	0.948501	0.833333	0.666667	0.535714	0.767857	0.660714	0.948603	0.800699	0.674699	0.519231	0.68883	0.802326	0.691781	0.896	0.938017	0.738636
53	0.70679	0.960415	0.875	0.666667	0.571429	0.910714	0.625	0.947418	0.839161	0.728916	0.514423	0.670213	0.823256	0.712329	0.809333	0.865702	0.727273
54	0.694444	0.953113	0.791667	0.722222	0.678571	0.803571	0.678571	0.929654	0.835664	0.783133	0.540865	0.755319	0.827907	0.746575	0.781333	0.811983	0.664773
55	0.688272	0.928901	0.708333	0.833333	0.678571	0.714286	0.75	0.897679	0.870629	0.843373	0.596154	0.81383	0.862791	0.657534	0.792	0.840909	0.6875
56	0.700617	0.88701	0.708333	0.833333	0.678571	0.803571	0.839286	0.846755	0.888112	0.813253	0.699519	0.81383	0.897674	0.794521	0.897333	0.88843	0.670455
57	0.70679	0.820523	0.708333	0.722222	0.75	0.803571	0.875	0.779015	0.821678	0.801205	0.826923	0.93883	0.876744	0.732877	0.797333	0.969008	0.585227
58	0.62963	0.743274	0.75	0.777778	0.642857	0.660714	0.785714	0.702984	0.758741	0.915663	0.822115	0.893617	0.85814	0.842466	0.774667	0.923554	0.556818
59	0.62963	0.65834	0.75	0.666667	0.714286	0.714286	0.803571	0.62198	0.72028	0.89759	0.836538	0.922872	0.876744	0.883562	0.8	0.830579	0.551136
60	0.626543	0.574174	0.75	0.611111	0.857143	0.642857	0.696429	0.535528	0.688811	0.86747	0.805288	0.904255	0.837209	0.828767	0.874667	0.822314	0.676136

## Sheet: cluster3
binding_sites	ZNF143_K562	ATF2_HepG2	ELF3_HepG2	FOSL2_HepG2	JUND_HepG2	TCF7L2_HepG2	YY1_HepG2	FOS_HeLaS3	JUND_HeLaS3	NFYA_HeLaS3	NFYB_HeLaS3	ATF7_MCF7	CLOCK_MCF7	CREB1_MCF7	FOS_MCF7	FOSL2_MCF7	JUND_MCF7	ATF2_H1	BACH1_H1	CTCF_H1	JUN_H1	JUND_H1	SRF_H1	TEAD4_H1	USF1_H1
0	0.151515	0.548589	0.619048	0.204545	0.219917	0.0909091	0.266667	0.982301	0.756667	0.977778	0.896552	0.287938	0.701754	0.551111	0.569204	0.485477	0.382514	0.855422	0.682171	0.903412	0.577778	0.72549	0.554795	0.190476	0.568898
1	0.19697	0.545455	0.625	0.261364	0.294606	0.0227273	0.316667	0.867257	0.783333	0.911111	0.885057	0.303502	0.754386	0.508889	0.557093	0.520747	0.459016	0.915663	0.70155	0.910499	0.588889	0.723039	0.527397	0.20068	0.514764
2	0.212121	0.547022	0.744048	0.229545	0.387967	0.0530303	0.233333	0.973451	0.803333	0.911111	0.908046	0.406615	0.675439	0.631111	0.623702	0.56639	0.54918	0.993976	0.77907	0.909711	0.533333	0.737745	0.496575	0.214286	0.483268
3	0.227273	0.581505	0.755952	0.270455	0.5	0.121212	0.266667	0.89823	0.835	0.855556	0.908046	0.470817	0.701754	0.715556	0.710208	0.595436	0.644809	0.975904	0.751938	0.934383	0.5	0.781863	0.616438	0.210884	0.485236
4	0.151515	0.567398	0.75	0.311364	0.537344	0.0909091	0.233333	0.853982	0.895	0.733333	0.862069	0.464981	0.605263	0.791111	0.757785	0.626556	0.726776	0.993976	0.802326	0.93832	0.522222	0.845588	0.609589	0.29932	0.448819
5	0.19697	0.510972	0.767857	0.347727	0.570539	0.181818	0.283333	0.814159	0.908333	0.566667	0.787356	0.431907	0.464912	0.771111	0.727509	0.672199	0.754098	0.89759	0.748062	0.957743	0.544444	0.848039	0.60274	0.336735	0.469488
6	0.166667	0.431034	0.821429	0.456818	0.578838	0.348485	0.2	0.761062	0.868333	0.444444	0.689655	0.381323	0.307018	0.802222	0.698962	0.676349	0.669399	0.789157	0.670543	0.968241	0.533333	0.740196	0.527397	0.418367	0.440945
7	0.181818	0.39185	0.791667	0.456818	0.510373	0.424242	0.216667	0.699115	0.756667	0.511111	0.488506	0.321012	0.210526	0.693333	0.558824	0.63278	0.620219	0.753012	0.631783	0.98084	0.444444	0.691176	0.568493	0.527211	0.427165
8	0.19697	0.327586	0.797619	0.404545	0.495851	0.462121	0.2	0.681416	0.851667	0.422222	0.408046	0.202335	0.157895	0.611111	0.415225	0.599585	0.54918	0.692771	0.562016	0.980052	0.466667	0.60049	0.65411	0.595238	0.430118
9	0.257576	0.30094	0.845238	0.384091	0.466805	0.424242	0.183333	0.619469	0.786667	0.277778	0.436782	0.214008	0.201754	0.486667	0.391003	0.558091	0.532787	0.728916	0.527132	0.964567	0.411111	0.615196	0.671233	0.636054	0.497047
10	0.242424	0.336991	0.863095	0.352273	0.425311	0.409091	0.166667	0.619469	0.755	0.333333	0.431034	0.155642	0.166667	0.546667	0.399654	0.572614	0.576503	0.783133	0.53876	0.954856	0.533333	0.595588	0.715753	0.72449	0.500984
11	0.257576	0.402821	0.886905	0.375	0.456432	0.439394	0.183333	0.455752	0.801667	0.255556	0.37931	0.235409	0.210526	0.622222	0.378893	0.643154	0.636612	0.771084	0.53876	0.924934	0.555556	0.60049	0.760274	0.765306	0.516732
12	0.242424	0.459248	0.934524	0.361364	0.485477	0.462121	0.166667	0.442478	0.75	0.333333	0.408046	0.340467	0.175439	0.755556	0.448097	0.724066	0.710383	0.783133	0.546512	0.899738	0.522222	0.580882	0.780822	0.79932	0.554134
13	0.348485	0.512539	0.910714	0.402273	0.53112	0.469697	0.25	0.367257	0.781667	0.355556	0.373563	0.322957	0.0614035	0.808889	0.463668	0.755187	0.825137	0.759036	0.523256	0.892126	0.588889	0.568627	0.821918	0.707483	0.562008
14	0.333333	0.54232	0.815476	0.395455	0.506224	0.439394	0.216667	0.539823	0.725	0.366667	0.33908	0.383268	0.0614035	0.904444	0.483564	0.76556	0.833333	0.662651	0.449612	0.873491	0.644444	0.57598	0.811644	0.690476	0.598425
15	0.378788	0.603448	0.791667	0.334091	0.450207	0.409091	0.233333	0.575221	0.711667	0.466667	0.33908	0.40856	0.140351	0.928889	0.384948	0.786307	0.822404	0.644578	0.403101	0.871916	0.755556	0.561275	0.791096	0.591837	0.598425
16	0.409091	0.641066	0.72619	0.315909	0.414938	0.386364	0.316667	0.566372	0.736667	0.533333	0.310345	0.464981	0.350877	0.946667	0.428201	0.73444	0.737705	0.656627	0.453488	0.870866	0.8	0.583333	0.770548	0.527211	0.590551
17	0.439394	0.673981	0.75	0.343182	0.369295	0.44697	0.366667	0.50885	0.743333	0.544444	0.442529	0.496109	0.552632	0.933333	0.49481	0.761411	0.688525	0.692771	0.468992	0.885302	0.811111	0.593137	0.784247	0.564626	0.612205
18	0.515152	0.721003	0.714286	0.415909	0.437759	0.484848	0.466667	0.530973	0.693333	0.533333	0.5	0.548638	0.535088	0.795556	0.621107	0.811203	0.696721	0.801205	0.511628	0.883727	0.755556	0.610294	0.715753	0.527211	0.623031
19	0.636364	0.730408	0.72619	0.552273	0.483402	0.424242	0.5	0.5	0.735	0.666667	0.557471	0.468872	0.535088	0.706667	0.765571	0.854772	0.696721	0.831325	0.647287	0.877165	0.822222	0.622549	0.743151	0.557823	0.67815
20	0.590909	0.755486	0.64881	0.661364	0.572614	0.424242	0.583333	0.553097	0.781667	0.811111	0.545977	0.431907	0.596491	0.737778	0.814879	0.950207	0.713115	0.819277	0.662791	0.855643	0.833333	0.664216	0.794521	0.517007	0.721457
21	0.621212	0.804075	0.577381	0.768182	0.568465	0.515152	0.533333	0.561947	0.698333	0.933333	0.54023	0.608949	0.605263	0.766667	0.881488	0.921162	0.688525	0.831325	0.658915	0.833858	0.866667	0.720588	0.842466	0.428571	0.772638
22	0.681818	0.858934	0.547619	0.825	0.645228	0.606061	0.583333	0.637168	0.761667	0.888889	0.597701	0.649805	0.675439	0.844444	0.865917	0.981328	0.696721	0.831325	0.693798	0.8	0.8	0.720588	0.797945	0.44898	0.706693
23	0.727273	0.865204	0.47619	0.829545	0.736515	0.621212	0.7	0.707965	0.855	0.8	0.649425	0.733463	0.675439	0.891111	0.900519	0.931535	0.693989	0.837349	0.639535	0.769554	0.788889	0.845588	0.712329	0.489796	0.714567
24	0.69697	0.822884	0.446429	0.872727	0.746888	0.575758	0.75	0.752212	0.885	0.766667	0.62069	0.854086	0.666667	0.957778	0.960208	0.935685	0.691257	0.825301	0.666667	0.737795	0.855556	0.821078	0.715753	0.62585	0.667323
25	0.712121	0.780564	0.375	0.884091	0.790456	0.515152	0.766667	0.610619	0.901667	0.766667	0.678161	0.821012	0.517544	0.926667	0.911765	0.925311	0.661202	0.843373	0.678295	0.716798	0.833333	0.889706	0.609589	0.636054	0.605315
26	0.787879	0.746082	0.357143	0.9	0.790456	0.462121	0.8	0.60177	0.888333	0.677778	0.729885	0.848249	0.315789	0.831111	0.875433	0.887967	0.614754	0.807229	0.70155	0.702362	0.844444	0.926471	0.582192	0.704082	0.537402
27	0.757576	0.738245	0.5	0.886364	0.809129	0.568182	0.716667	0.59292	0.883333	0.722222	0.701149	0.750973	0.438596	0.757778	0.762111	0.825726	0.614754	0.825301	0.74031	0.688451	0.811111	0.870098	0.582192	0.731293	0.625
28	0.727273	0.667712	0.39881	0.834091	0.792531	0.55303	0.683333	0.588496	0.831667	0.777778	0.614943	0.673152	0.482456	0.675556	0.660035	0.707469	0.57377	0.777108	0.705426	0.682152	0.722222	0.904412	0.578767	0.70068	0.670276
29	0.848485	0.586207	0.416667	0.743182	0.761411	0.492424	0.616667	0.570796	0.823333	0.6	0.597701	0.577821	0.517544	0.58	0.532872	0.628631	0.592896	0.777108	0.736434	0.673228	0.777778	0.803922	0.547945	0.666667	0.741142
30	0.757576	0.562696	0.380952	0.638636	0.709544	0.515152	0.65	0.690265	0.738333	0.588889	0.609195	0.546693	0.54386	0.491111	0.385813	0.541494	0.581967	0.76506	0.709302	0.671129	0.822222	0.727941	0.506849	0.608844	0.855315
31	0.681818	0.587774	0.410714	0.511364	0.603734	0.469697	0.583333	0.606195	0.706667	0.544444	0.58046	0.498054	0.596491	0.502222	0.347751	0.46888	0.510929	0.76506	0.686047	0.652231	0.777778	0.747549	0.523973	0.605442	0.856299
32	0.636364	0.609718	0.357143	0.388636	0.564315	0.454545	0.633333	0.588496	0.75	0.4	0.597701	0.544747	0.657895	0.531111	0.333045	0.520747	0.581967	0.777108	0.643411	0.631234	0.777778	0.786765	0.469178	0.653061	0.838583
33	0.606061	0.670846	0.470238	0.331818	0.537344	0.545455	0.616667	0.544248	0.721667	0.422222	0.545977	0.712062	0.587719	0.56	0.456747	0.483402	0.527322	0.777108	0.635659	0.630446	0.788889	0.764706	0.441781	0.683673	0.78248
34	0.484848	0.689655	0.541667	0.359091	0.607884	0.401515	0.5	0.548673	0.78	0.3	0.425287	0.714008	0.692982	0.653333	0.480104	0.564315	0.571038	0.759036	0.70155	0.627034	0.788889	0.77451	0.386986	0.697279	0.682087
35	0.590909	0.684953	0.565476	0.325	0.605809	0.44697	0.416667	0.646018	0.806667	0.288889	0.454023	0.774319	0.780702	0.677778	0.433391	0.589212	0.601093	0.698795	0.697674	0.610499	0.888889	0.811275	0.335616	0.731293	0.679134
36	0.666667	0.661442	0.613095	0.334091	0.580913	0.462121	0.383333	0.637168	0.8	0.3	0.5	0.811284	0.649123	0.704444	0.487889	0.616183	0.568306	0.656627	0.790698	0.612598	0.833333	0.72549	0.376712	0.707483	0.632874
37	0.575758	0.664577	0.636905	0.343182	0.53527	0.484848	0.366667	0.668142	0.72	0.322222	0.505747	0.682879	0.570175	0.613333	0.553633	0.618257	0.587432	0.638554	0.775194	0.624934	0.811111	0.703431	0.390411	0.755102	0.652559
38	0.515152	0.592476	0.696429	0.309091	0.473029	0.462121	0.366667	0.579646	0.685	0.433333	0.517241	0.673152	0.473684	0.555556	0.568339	0.647303	0.52459	0.590361	0.717054	0.632546	0.811111	0.637255	0.493151	0.843537	0.641732
39	0.575758	0.520376	0.672619	0.243182	0.417012	0.530303	0.35	0.5	0.59	0.411111	0.5	0.675097	0.368421	0.577778	0.490484	0.628631	0.538251	0.650602	0.693798	0.638845	0.744444	0.561275	0.606164	0.87415	0.715551
40	0.560606	0.485893	0.583333	0.179545	0.340249	0.5	0.3	0.438053	0.571667	0.455556	0.551724	0.575875	0.27193	0.511111	0.429066	0.599585	0.52459	0.656627	0.639535	0.635696	0.688889	0.541667	0.64726	0.768707	0.639764
41	0.515152	0.451411	0.613095	0.134091	0.294606	0.522727	0.266667	0.30531	0.513333	0.444444	0.54023	0.550584	0.263158	0.435556	0.397924	0.549793	0.480874	0.686747	0.620155	0.627822	0.722222	0.5	0.660959	0.795918	0.600394
42	0.560606	0.487461	0.625	0.143182	0.219917	0.545455	0.25	0.252212	0.485	0.388889	0.632184	0.566148	0.236842	0.417778	0.360727	0.5	0.489071	0.662651	0.546512	0.594226	0.733333	0.502451	0.660959	0.683673	0.473425
43	0.469697	0.449843	0.565476	0.163636	0.257261	0.492424	0.3	0.292035	0.613333	0.377778	0.695402	0.593385	0.0701754	0.466667	0.365052	0.452282	0.456284	0.626506	0.507752	0.568241	0.711111	0.495098	0.688356	0.707483	0.341535
44	0.393939	0.431034	0.494048	0.190909	0.280083	0.522727	0.333333	0.358407	0.745	0.433333	0.689655	0.663424	0.157895	0.546667	0.355536	0.446058	0.478142	0.566265	0.484496	0.552756	0.811111	0.463235	0.664384	0.680272	0.26378
45	0.575758	0.454545	0.464286	0.172727	0.261411	0.454545	0.333333	0.39823	0.706667	0.577778	0.752874	0.669261	0.149123	0.615556	0.33218	0.443983	0.423497	0.524096	0.496124	0.536745	0.788889	0.397059	0.681507	0.578231	0.15748
46	0.545455	0.460815	0.410714	0.165909	0.338174	0.356061	0.366667	0.376106	0.631667	0.6	0.775862	0.618677	0.157895	0.666667	0.369377	0.381743	0.442623	0.53012	0.465116	0.53727	0.733333	0.345588	0.609589	0.445578	0.0856299
47	0.530303	0.387147	0.410714	0.156818	0.290456	0.439394	0.366667	0.420354	0.56	0.511111	0.695402	0.575875	0.192982	0.591111	0.327855	0.348548	0.409836	0.46988	0.422481	0.56378	0.677778	0.289216	0.623288	0.418367	0.0826772
48	0.469697	0.280564	0.291667	0.0772727	0.195021	0.30303	0.383333	0.411504	0.451667	0.488889	0.637931	0.396887	0.236842	0.491111	0.224913	0.294606	0.387978	0.433735	0.348837	0.576903	0.611111	0.213235	0.636986	0.306122	0.108268
49	0.560606	0.217868	0.208333	0.0409091	0.0394191	0.25	0.366667	0.486726	0.363333	0.422222	0.586207	0.225681	0.201754	0.286667	0.16955	0.215768	0.346995	0.415663	0.313953	0.569029	0.577778	0.193627	0.623288	0.214286	0.21752
50	0.424242	0.181818	0.172619	0.0590909	0.0560166	0.257576	0.45	0.469027	0.356667	0.488889	0.551724	0.140078	0.105263	0.188889	0.128028	0.20332	0.243169	0.36747	0.251938	0.555906	0.5	0.169118	0.681507	0.146259	0.325787
51	0.287879	0.133229	0.190476	0.0590909	0.0435685	0.25	0.45	0.482301	0.335	0.566667	0.54023	0.0875486	0.254386	0.117778	0.207612	0.180498	0.262295	0.343373	0.24031	0.528346	0.5	0.169118	0.616438	0.221088	0.382874
52	0.363636	0.109718	0.339286	0.0954545	0.105809	0.234848	0.416667	0.482301	0.353333	0.522222	0.45977	0.0311284	0.307018	0.148889	0.263841	0.228216	0.20765	0.295181	0.25969	0.488451	0.488889	0.183824	0.575342	0.22449	0.268701
53	0.318182	0.109718	0.386905	0.134091	0.188797	0.19697	0.45	0.553097	0.34	0.633333	0.431034	0.210117	0.219298	0.24	0.276817	0.26971	0.150273	0.259036	0.263566	0.444619	0.444444	0.262255	0.44863	0.377551	0.15748
54	0.287879	0.139498	0.363095	0.168182	0.221992	0.19697	0.416667	0.455752	0.355	0.6	0.327586	0.198444	0.175439	0.417778	0.269896	0.315353	0.180328	0.210843	0.29845	0.403675	0.411111	0.333333	0.246575	0.204082	0.0856299
55	0.227273	0.122257	0.380952	0.204545	0.302905	0.181818	0.416667	0.393805	0.368333	0.533333	0.298851	0.2393	0.236842	0.462222	0.258651	0.294606	0.128415	0.216867	0.306202	0.361942	0.344444	0.360294	0.181507	0.139456	0.11811
56	0.257576	0.194357	0.488095	0.215909	0.334025	0.310606	0.433333	0.234513	0.33	0.455556	0.293103	0.322957	0.350877	0.506667	0.269031	0.263485	0.169399	0.26506	0.267442	0.307087	0.266667	0.436275	0.116438	0.136054	0.125
57	0.257576	0.275862	0.458333	0.261364	0.33195	0.280303	0.45	0.168142	0.236667	0.4	0.201149	0.357977	0.491228	0.511111	0.320069	0.275934	0.218579	0.26506	0.255814	0.240945	0.277778	0.455882	0.0308219	0.115646	0.188976
58	0.348485	0.297806	0.464286	0.290909	0.323651	0.44697	0.466667	0.132743	0.188333	0.344444	0.132184	0.418288	0.605263	0.486667	0.342561	0.329876	0.218579	0.361446	0.147287	0.176115	0.222222	0.485294	0.0547945	0.0884354	0.332677
59	0.469697	0.274295	0.60119	0.461364	0.429461	0.575758	0.416667	0.146018	0.253333	0.377778	0.0747126	0.441634	0.763158	0.406667	0.402249	0.36722	0.275956	0.355422	0.158915	0.101575	0.244444	0.519608	0.167808	0.119048	0.482283
60	0.439394	0.302508	0.595238	0.509091	0.417012	0.75	0.466667	0.172566	0.156667	0.311111	0.0747126	0.406615	0.631579	0.411111	0.484429	0.443983	0.336066	0.379518	0.302326	0.0335958	0.233333	0.54902	0.174658	0.163265	0.65748

## Sheet: cluster4
binding_sites	NRF1_K562	SPI1_K562	FOXA1_HepG2	FOXA2_HepG2	FOXA3_HepG2	FOXP1_HepG2	GATA4_HepG2	NFYB_HepG2	ZNF263_HepG2	CTCF_HeLaS3	CTCF_MCF7	GATA3_MCF7	RFX5_MCF7	NRF1_H1	REST_H1
0	0.622449	0.453782	0.391304	0.242188	0.211268	0.111111	0.695652	0.45614	0.924242	0.521936	0.601794	0.102564	0.377778	1	0.635714
1	0.607143	0.504202	0.423913	0.253906	0.133803	0.0555556	0.652174	0.438596	0.916667	0.507564	0.592377	0.0769231	0.377778	0.959627	0.667857
2	0.530612	0.508403	0.38587	0.3125	0.232394	0.134921	0.630435	0.45614	0.897727	0.477307	0.577578	0.134615	0.444444	0.869565	0.657143
3	0.510204	0.605042	0.554348	0.34375	0.309859	0.261905	0.586957	0.464912	0.878788	0.499244	0.587892	0.211538	0.422222	0.798137	0.721429
4	0.489796	0.55042	0.733696	0.472656	0.492958	0.396825	0.543478	0.517544	0.814394	0.487141	0.573543	0.173077	0.477778	0.757764	0.785714
5	0.540816	0.579832	0.820652	0.628906	0.619718	0.571429	0.543478	0.447368	0.806818	0.456884	0.578027	0.224359	0.466667	0.729814	0.789286
6	0.494898	0.609244	0.793478	0.585938	0.598592	0.515873	0.608696	0.403509	0.780303	0.440242	0.576682	0.301282	0.455556	0.667702	0.803571
7	0.459184	0.554622	0.798913	0.648438	0.676056	0.587302	0.652174	0.315789	0.723485	0.448563	0.589686	0.378205	0.433333	0.649068	0.767857
8	0.428571	0.483193	0.755435	0.652344	0.711268	0.650794	0.652174	0.447368	0.681818	0.422088	0.562332	0.391026	0.422222	0.618012	0.728571
9	0.438776	0.436975	0.798913	0.570312	0.661972	0.642857	0.565217	0.438596	0.575758	0.393343	0.557848	0.403846	0.511111	0.571429	0.664286
10	0.352041	0.42437	0.771739	0.652344	0.661972	0.619048	0.543478	0.429825	0.568182	0.393343	0.527354	0.49359	0.4	0.506211	0.585714
11	0.357143	0.411765	0.788043	0.757812	0.640845	0.666667	0.5	0.491228	0.549242	0.367625	0.488789	0.583333	0.333333	0.487578	0.492857
12	0.377551	0.348739	0.820652	0.753906	0.65493	0.690476	0.5	0.517544	0.503788	0.311649	0.440359	0.615385	0.311111	0.481366	0.360714
13	0.367347	0.344538	0.744565	0.605469	0.514085	0.587302	0.565217	0.54386	0.564394	0.267776	0.407623	0.653846	0.266667	0.484472	0.317857
14	0.362245	0.386555	0.538043	0.519531	0.43662	0.52381	0.521739	0.535088	0.44697	0.220877	0.36861	0.564103	0.277778	0.521739	0.328571
15	0.377551	0.357143	0.347826	0.359375	0.190141	0.404762	0.608696	0.578947	0.42803	0.186838	0.388789	0.467949	0.266667	0.515528	0.35
16	0.30102	0.336134	0.23913	0.238281	0.105634	0.325397	0.608696	0.552632	0.363636	0.175492	0.39148	0.480769	0.366667	0.503106	0.432143
17	0.30102	0.386555	0.266304	0.34375	0.105634	0.396825	0.543478	0.473684	0.253788	0.261725	0.445291	0.403846	0.355556	0.496894	0.457143
18	0.321429	0.352941	0.326087	0.367188	0.140845	0.444444	0.456522	0.491228	0.231061	0.30711	0.469955	0.403846	0.311111	0.428571	0.525
19	0.30102	0.352941	0.494565	0.417969	0.204225	0.492063	0.456522	0.429825	0.310606	0.30938	0.495964	0.391026	0.288889	0.36646	0.539286
20	0.214286	0.298319	0.543478	0.5625	0.34507	0.619048	0.456522	0.464912	0.231061	0.302572	0.501794	0.384615	0.211111	0.341615	0.432143
21	0.19898	0.243697	0.440217	0.46875	0.422535	0.730159	0.456522	0.508772	0.204545	0.313918	0.488341	0.487179	0.211111	0.335404	0.446429
22	0.193878	0.218487	0.51087	0.449219	0.415493	0.761905	0.391304	0.464912	0.140152	0.283661	0.434529	0.596154	0.233333	0.326087	0.453571
23	0.193878	0.239496	0.516304	0.578125	0.464789	0.801587	0.347826	0.473684	0.174242	0.22466	0.377578	0.641026	0.255556	0.329193	0.396429
24	0.147959	0.176471	0.63587	0.621094	0.619718	0.936508	0.282609	0.508772	0.0757576	0.179274	0.346637	0.75641	0.155556	0.341615	0.375
25	0.137755	0.184874	0.630435	0.59375	0.549296	0.873016	0.282609	0.464912	0.113636	0.200454	0.329148	0.75641	0.155556	0.291925	0.382143
26	0.112245	0.226891	0.673913	0.523438	0.570423	0.880952	0.217391	0.342105	0.17803	0.220121	0.316592	0.788462	0.255556	0.298137	0.407143
27	0.122449	0.226891	0.73913	0.5	0.619718	0.849206	0.195652	0.324561	0.19697	0.261725	0.3713	0.711538	0.288889	0.31677	0.414286
28	0.163265	0.214286	0.586957	0.46875	0.619718	0.84127	0.195652	0.298246	0.284091	0.322995	0.406726	0.608974	0.322222	0.347826	0.435714
29	0.153061	0.155462	0.581522	0.429688	0.521127	0.714286	0.173913	0.289474	0.416667	0.372163	0.458744	0.564103	0.477778	0.447205	0.464286
30	0.193878	0.113445	0.423913	0.355469	0.359155	0.698413	0.152174	0.307018	0.352273	0.385023	0.482511	0.50641	0.6	0.546584	0.482143
31	0.270408	0.117647	0.380435	0.347656	0.338028	0.634921	0.217391	0.22807	0.382576	0.375946	0.463677	0.519231	0.588889	0.580745	0.485714
32	0.306122	0.168067	0.548913	0.464844	0.352113	0.68254	0.23913	0.245614	0.518939	0.350227	0.429148	0.544872	0.644444	0.602484	0.532143
33	0.352041	0.184874	0.451087	0.261719	0.267606	0.571429	0.282609	0.184211	0.583333	0.350983	0.41435	0.711538	0.688889	0.65528	0.603571
34	0.382653	0.247899	0.358696	0.109375	0.260563	0.507937	0.326087	0.122807	0.609848	0.35174	0.384753	0.794872	0.744444	0.686335	0.689286
35	0.413265	0.369748	0.190217	0.152344	0.15493	0.412698	0.369565	0.0964912	0.655303	0.377458	0.390583	0.74359	0.755556	0.751553	0.710714
36	0.459184	0.403361	0.320652	0.308594	0.246479	0.468254	0.413043	0.236842	0.602273	0.375189	0.433184	0.852564	0.688889	0.807453	0.696429
37	0.47449	0.457983	0.331522	0.511719	0.309859	0.52381	0.478261	0.359649	0.549242	0.407716	0.513453	0.865385	0.644444	0.813665	0.664286
38	0.484694	0.52521	0.483696	0.578125	0.260563	0.5	0.5	0.377193	0.575758	0.512103	0.574888	0.75	0.688889	0.798137	0.614286
39	0.515306	0.512605	0.63587	0.640625	0.429577	0.587302	0.586957	0.45614	0.613636	0.57413	0.634978	0.769231	0.677778	0.785714	0.575
40	0.571429	0.57563	0.717391	0.707031	0.577465	0.698413	0.673913	0.438596	0.534091	0.586989	0.666368	0.519231	0.8	0.785714	0.542857
41	0.55102	0.563025	0.788043	0.761719	0.683099	0.650794	0.76087	0.377193	0.583333	0.608926	0.7	0.5	0.8	0.748447	0.614286
42	0.52551	0.588235	0.847826	0.707031	0.676056	0.619048	0.717391	0.438596	0.700758	0.612708	0.721525	0.50641	0.844444	0.729814	0.65
43	0.55102	0.647059	0.804348	0.667969	0.746479	0.619048	0.673913	0.535088	0.602273	0.661876	0.699552	0.442308	0.766667	0.736025	0.657143
44	0.591837	0.617647	0.918478	0.839844	0.866197	0.698413	0.782609	0.736842	0.568182	0.622542	0.669058	0.525641	0.666667	0.745342	0.782143
45	0.653061	0.663866	0.869565	0.886719	0.823944	0.714286	0.804348	0.815789	0.602273	0.639183	0.696413	0.570513	0.7	0.807453	0.839286
46	0.729592	0.630252	0.896739	0.886719	0.866197	0.698413	0.804348	0.95614	0.643939	0.678517	0.733184	0.551282	0.611111	0.785714	0.892857
47	0.80102	0.680672	0.836957	0.753906	0.809859	0.650794	0.804348	0.815789	0.67803	0.754917	0.79417	0.641026	0.722222	0.804348	0.871429
48	0.811224	0.735294	0.831522	0.648438	0.767606	0.626984	0.76087	0.736842	0.727273	0.810893	0.864126	0.647436	0.777778	0.819876	0.832143
49	0.852041	0.743697	0.73913	0.671875	0.873239	0.674603	0.804348	0.72807	0.719697	0.863086	0.904933	0.634615	0.788889	0.850932	0.796429
50	0.887755	0.781513	0.701087	0.566406	0.760563	0.579365	0.73913	0.701754	0.69697	0.8941	0.936323	0.589744	0.811111	0.900621	0.778571
51	0.882653	0.773109	0.76087	0.570312	0.697183	0.634921	0.73913	0.692982	0.719697	0.871407	0.928251	0.5	0.877778	0.850932	0.825
52	0.913265	0.743697	0.815217	0.554688	0.65493	0.698413	0.673913	0.72807	0.685606	0.827534	0.863229	0.570513	0.922222	0.81677	0.925
53	0.933673	0.726891	0.744565	0.617188	0.65493	0.753968	0.630435	0.72807	0.647727	0.749622	0.804484	0.717949	0.877778	0.832298	0.889286
54	0.913265	0.647059	0.701087	0.597656	0.570423	0.690476	0.652174	0.692982	0.628788	0.69289	0.725561	0.75641	0.877778	0.804348	0.835714
55	0.867347	0.693277	0.576087	0.523438	0.542254	0.547619	0.5	0.552632	0.727273	0.661876	0.626009	0.775641	0.855556	0.78882	0.778571
56	0.831633	0.684874	0.619565	0.480469	0.591549	0.571429	0.478261	0.517544	0.731061	0.621029	0.558744	0.820513	0.666667	0.795031	0.678571
57	0.821429	0.647059	0.61413	0.378906	0.535211	0.579365	0.391304	0.368421	0.700758	0.437216	0.443498	0.75641	0.766667	0.872671	0.478571
58	0.755102	0.739496	0.483696	0.304688	0.535211	0.547619	0.326087	0.359649	0.655303	0.322239	0.304484	0.705128	0.877778	0.841615	0.285714
59	0.806122	0.840336	0.516304	0.210938	0.457746	0.52381	0.282609	0.421053	0.655303	0.162632	0.186099	0.564103	0.755556	0.804348	0.210714
60	0.795918	0.932773	0.402174	0.015625	0.302817	0.484127	0.23913	0.526316	0.662879	0.0249622	0.126009	0.423077	0.555556	0.776398	0.0607143

## Sheet: cluster5
binding_sites	IRF9_K562	SMAD5_K562	TFE3_K562	ZBTB7A_K562	ZNF274_K562	CREB1_HepG2	ERF_HepG2	IKZF1_HepG2	NFYA_HepG2	NFYC_HepG2	PITX1_HepG2	SRF_HepG2	TFE3_HepG2	TP53_HepG2	ZBTB33_HepG2	SREBF2_HeLaS3	SREBF1_MCF7	YY1_H1	ZNF274_H1
0	0.25	0.333333	0.216216	0.837838	0.857143	0.358974	0.466667	0.0625	0.342105	0.260274	0.192308	0.263889	0.576923	0.851064	0.857143	0.727273	0.263682	0.479675	0.6375
1	0.291667	0.3	0.22973	0.891892	0.757143	0.397436	0.5	0.0625	0.328947	0.246575	0.211538	0.208333	0.576923	0.797872	0.928571	0.818182	0.258706	0.50813	0.578125
2	0.208333	0.266667	0.175676	0.824324	0.728571	0.490385	0.4	0.125	0.25	0.239726	0.201923	0.243056	0.461538	0.808511	0.928571	0.772727	0.231343	0.418699	0.575
3	0.291667	0.233333	0.148649	0.837838	0.628571	0.580128	0.333333	0.1875	0.315789	0.315068	0.25	0.305556	0.423077	0.808511	0.928571	0.727273	0.211443	0.418699	0.53125
4	0.375	0.233333	0.114865	0.783784	0.657143	0.580128	0.316667	0.21875	0.276316	0.294521	0.211538	0.326389	0.365385	0.723404	0.846939	0.727273	0.21393	0.341463	0.5125
5	0.458333	0.233333	0.162162	0.756757	0.671429	0.509615	0.3	0.25	0.223684	0.191781	0.298077	0.451389	0.326923	0.755319	0.795918	0.772727	0.221393	0.300813	0.53125
6	0.541667	0.233333	0.121622	0.716216	0.685714	0.49359	0.216667	0.28125	0.328947	0.260274	0.5	0.465278	0.25	0.670213	0.744898	0.681818	0.199005	0.313008	0.53125
7	0.333333	0.233333	0.182432	0.783784	0.7	0.423077	0.15	0.21875	0.328947	0.184932	0.596154	0.479167	0.365385	0.638298	0.714286	0.636364	0.191542	0.272358	0.590625
8	0.5	0.266667	0.358108	0.675676	0.7	0.394231	0.15	0.25	0.513158	0.349315	0.653846	0.555556	0.461538	0.680851	0.612245	0.636364	0.171642	0.170732	0.625
9	0.375	0.4	0.371622	0.635135	0.728571	0.336538	0.183333	0.28125	0.605263	0.39726	0.778846	0.597222	0.5	0.638298	0.591837	0.772727	0.144279	0.207317	0.715625
10	0.416667	0.366667	0.358108	0.608108	0.8	0.451923	0.216667	0.34375	0.618421	0.458904	0.798077	0.611111	0.653846	0.702128	0.591837	0.636364	0.121891	0.146341	0.709375
11	0.458333	0.5	0.425676	0.432432	0.771429	0.532051	0.283333	0.375	0.736842	0.547945	0.807692	0.666667	0.730769	0.606383	0.479592	0.590909	0.124378	0.199187	0.725
12	0.625	0.6	0.304054	0.5	0.842857	0.63141	0.35	0.5625	0.763158	0.561644	0.740385	0.666667	0.826923	0.457447	0.469388	0.545455	0.126866	0.203252	0.66875
13	0.666667	0.6	0.371622	0.5	0.7	0.717949	0.4	0.625	0.881579	0.664384	0.625	0.75	0.884615	0.425532	0.510204	0.5	0.114428	0.329268	0.6
14	0.75	0.7	0.337838	0.472973	0.657143	0.794872	0.483333	0.5625	0.842105	0.609589	0.596154	0.770833	0.788462	0.393617	0.479592	0.5	0.141791	0.410569	0.55
15	0.833333	0.766667	0.371622	0.5	0.5	0.775641	0.583333	0.625	0.881579	0.609589	0.519231	0.743056	0.75	0.393617	0.540816	0.5	0.236318	0.528455	0.484375
16	0.875	0.8	0.486486	0.337838	0.557143	0.724359	0.633333	0.59375	0.763158	0.541096	0.384615	0.826389	0.769231	0.425532	0.530612	0.545455	0.293532	0.601626	0.571875
17	0.875	0.733333	0.621622	0.364865	0.542857	0.769231	0.55	0.65625	0.723684	0.527397	0.317308	0.798611	0.653846	0.43617	0.5	0.545455	0.470149	0.605691	0.6125
18	0.791667	0.566667	0.682432	0.364865	0.571429	0.782051	0.583333	0.78125	0.723684	0.643836	0.298077	0.770833	0.5	0.5	0.469388	0.409091	0.629353	0.670732	0.765625
19	0.791667	0.666667	0.743243	0.351351	0.6	0.791667	0.65	0.75	0.605263	0.582192	0.326923	0.756944	0.423077	0.478723	0.479592	0.454545	0.708955	0.727642	0.80625
20	0.791667	0.533333	0.790541	0.324324	0.628571	0.740385	0.683333	0.71875	0.578947	0.657534	0.336538	0.666667	0.365385	0.425532	0.397959	0.454545	0.748756	0.686992	0.875
21	0.708333	0.466667	0.871622	0.337838	0.628571	0.679487	0.65	0.71875	0.552632	0.684932	0.278846	0.645833	0.346154	0.404255	0.418367	0.5	0.788557	0.772358	0.84375
22	0.75	0.466667	0.810811	0.310811	0.542857	0.717949	0.7	0.75	0.447368	0.636986	0.269231	0.583333	0.269231	0.340426	0.408163	0.5	0.858209	0.747967	0.75625
23	0.583333	0.466667	0.864865	0.310811	0.542857	0.602564	0.666667	0.65625	0.526316	0.643836	0.278846	0.555556	0.173077	0.276596	0.367347	0.409091	0.883085	0.686992	0.69375
24	0.666667	0.566667	0.77027	0.364865	0.528571	0.522436	0.616667	0.5625	0.460526	0.513699	0.269231	0.513889	0.134615	0.276596	0.367347	0.5	0.838308	0.638211	0.63125
25	0.583333	0.466667	0.675676	0.22973	0.471429	0.445513	0.55	0.5625	0.447368	0.5	0.240385	0.451389	0.269231	0.297872	0.377551	0.545455	0.756219	0.601626	0.6625
26	0.541667	0.466667	0.695946	0.216216	0.5	0.400641	0.566667	0.46875	0.328947	0.506849	0.221154	0.458333	0.307692	0.297872	0.397959	0.454545	0.597015	0.45935	0.69375
27	0.541667	0.5	0.567568	0.162162	0.414286	0.326923	0.55	0.40625	0.315789	0.527397	0.201923	0.409722	0.269231	0.234043	0.326531	0.545455	0.420398	0.390244	0.690625
28	0.5	0.5	0.5	0.135135	0.4	0.262821	0.5	0.34375	0.342105	0.527397	0.153846	0.368056	0.365385	0.319149	0.255102	0.545455	0.348259	0.272358	0.6625
29	0.375	0.6	0.364865	0.297297	0.414286	0.221154	0.433333	0.28125	0.197368	0.363014	0.173077	0.3125	0.403846	0.393617	0.285714	0.5	0.328358	0.166667	0.665625
30	0.375	0.533333	0.222973	0.22973	0.4	0.205128	0.416667	0.3125	0.144737	0.232877	0.192308	0.277778	0.5	0.542553	0.204082	0.454545	0.29602	0.154472	0.634375
31	0.375	0.533333	0.256757	0.27027	0.3	0.259615	0.35	0.34375	0.144737	0.178082	0.153846	0.194444	0.596154	0.446809	0.153061	0.590909	0.241294	0.227642	0.525
32	0.375	0.433333	0.263514	0.216216	0.271429	0.233974	0.3	0.3125	0.105263	0.10274	0.182692	0.208333	0.538462	0.361702	0.142857	0.590909	0.191542	0.174797	0.440625
33	0.375	0.266667	0.337838	0.256757	0.228571	0.304487	0.35	0.25	0.184211	0.0890411	0.192308	0.236111	0.461538	0.287234	0.153061	0.681818	0.211443	0.166667	0.275
34	0.291667	0.366667	0.344595	0.310811	0.185714	0.333333	0.466667	0.1875	0.144737	0.0616438	0.182692	0.25	0.5	0.223404	0.183673	0.545455	0.266169	0.154472	0.203125
35	0.208333	0.4	0.378378	0.337838	0.128571	0.330128	0.433333	0.21875	0.0921053	0.0821918	0.326923	0.284722	0.365385	0.202128	0.22449	0.590909	0.226368	0.121951	0.1375
36	0.166667	0.333333	0.398649	0.337838	0.128571	0.342949	0.4	0.3125	0.0789474	0.10274	0.259615	0.291667	0.365385	0.159574	0.244898	0.5	0.273632	0.186992	0.178125
37	0.291667	0.233333	0.432432	0.297297	0.2	0.375	0.383333	0.34375	0.276316	0.143836	0.240385	0.361111	0.365385	0.138298	0.285714	0.5	0.298507	0.243902	0.2125
38	0.291667	0.133333	0.439189	0.364865	0.2	0.330128	0.383333	0.4375	0.328947	0.280822	0.346154	0.326389	0.326923	0.202128	0.306122	0.5	0.310945	0.296748	0.209375
39	0.25	0.166667	0.581081	0.27027	0.128571	0.285256	0.383333	0.4375	0.276316	0.267123	0.394231	0.284722	0.25	0.265957	0.326531	0.636364	0.303483	0.426829	0.15625
40	0.291667	0.166667	0.709459	0.297297	0.0857143	0.301282	0.483333	0.46875	0.394737	0.321918	0.413462	0.388889	0.384615	0.276596	0.285714	0.454545	0.300995	0.565041	0.09375
41	0.375	0.166667	0.689189	0.337838	0.114286	0.307692	0.516667	0.46875	0.447368	0.369863	0.548077	0.395833	0.346154	0.223404	0.285714	0.454545	0.320896	0.609756	0.03125
42	0.291667	0.166667	0.635135	0.216216	0.1	0.304487	0.5	0.5	0.434211	0.40411	0.490385	0.409722	0.423077	0.180851	0.306122	0.272727	0.345771	0.589431	0.021875
43	0.375	0.1	0.608108	0.283784	0.128571	0.304487	0.416667	0.46875	0.447368	0.438356	0.567308	0.416667	0.365385	0.159574	0.295918	0.318182	0.338308	0.54878	0.04375
44	0.375	0.1	0.581081	0.297297	0.142857	0.269231	0.483333	0.5625	0.434211	0.513699	0.605769	0.423611	0.346154	0.244681	0.326531	0.227273	0.412935	0.51626	0.090625
45	0.291667	0.133333	0.567568	0.364865	0.214286	0.233974	0.45	0.53125	0.434211	0.59589	0.519231	0.444444	0.365385	0.244681	0.408163	0.181818	0.370647	0.642276	0.178125
46	0.291667	0.133333	0.466216	0.283784	0.257143	0.291667	0.416667	0.46875	0.447368	0.575342	0.5	0.479167	0.442308	0.180851	0.397959	0.136364	0.345771	0.642276	0.24375
47	0.333333	0.133333	0.202703	0.27027	0.285714	0.36859	0.35	0.40625	0.513158	0.616438	0.442308	0.430556	0.365385	0.0425532	0.44898	0.272727	0.335821	0.597561	0.259375
48	0.25	0.166667	0.290541	0.364865	0.228571	0.307692	0.416667	0.5	0.368421	0.59589	0.259615	0.472222	0.403846	0.0425532	0.489796	0.181818	0.368159	0.593496	0.221875
49	0.333333	0.166667	0.297297	0.351351	0.2	0.288462	0.35	0.4375	0.618421	0.616438	0.163462	0.444444	0.384615	0.0744681	0.469388	0.227273	0.415423	0.593496	0.19375
50	0.333333	0.4	0.371622	0.445946	0.3	0.304487	0.4	0.46875	0.644737	0.636986	0.153846	0.381944	0.423077	0.0851064	0.459184	0.363636	0.40796	0.544715	0.278125
51	0.333333	0.4	0.391892	0.391892	0.357143	0.294872	0.483333	0.5	0.592105	0.636986	0.153846	0.368056	0.480769	0.106383	0.469388	0.5	0.298507	0.439024	0.328125
52	0.375	0.366667	0.385135	0.472973	0.457143	0.298077	0.583333	0.6875	0.513158	0.664384	0.259615	0.298611	0.461538	0.117021	0.479592	0.454545	0.253731	0.434959	0.503125
53	0.416667	0.333333	0.398649	0.445946	0.5	0.362179	0.633333	0.65625	0.447368	0.582192	0.278846	0.3125	0.480769	0.0957447	0.540816	0.636364	0.211443	0.45122	0.575
54	0.416667	0.4	0.560811	0.472973	0.657143	0.394231	0.7	0.78125	0.421053	0.486301	0.471154	0.291667	0.5	0.180851	0.540816	0.681818	0.231343	0.589431	0.68125
55	0.458333	0.4	0.506757	0.540541	0.728571	0.432692	0.716667	0.65625	0.381579	0.417808	0.653846	0.201389	0.576923	0.138298	0.622449	0.727273	0.238806	0.601626	0.703125
56	0.458333	0.5	0.621622	0.540541	0.7	0.439103	0.8	0.65625	0.355263	0.335616	0.778846	0.145833	0.576923	0.0638298	0.663265	0.636364	0.238806	0.617886	0.7375
57	0.583333	0.5	0.554054	0.432432	0.742857	0.541667	0.733333	0.71875	0.328947	0.356164	0.75	0.208333	0.538462	0.0638298	0.714286	0.681818	0.253731	0.670732	0.75625
58	0.583333	0.566667	0.5	0.486486	0.742857	0.615385	0.716667	0.78125	0.460526	0.458904	0.682692	0.1875	0.461538	0.117021	0.785714	0.636364	0.226368	0.593496	0.74375
59	0.583333	0.4	0.5	0.567568	0.685714	0.583333	0.716667	0.65625	0.539474	0.541096	0.605769	0.215278	0.461538	0.0957447	0.714286	0.590909	0.256219	0.617886	0.721875
60	0.541667	0.4	0.47973	0.540541	0.6	0.516026	0.716667	0.78125	0.447368	0.568493	0.538462	0.263889	0.423077	0.0851064	0.755102	0.545455	0.288557	0.613821	0.675

## Sheet: cluster6
binding_sites	CEBPB_K562	CEBPG_K562	LEF1_K562	NFYB_K562	ZNF263_K562	HNF4A_HepG2	MEF2A_HepG2	NFIA_HepG2	TEF_HepG2	ZKSCAN1_HepG2	ZNF460_HepG2	CEBPB_HeLaS3	ZKSCAN1_HeLaS3	E2F8_MCF7	TCF7L2_MCF7	ZKSCAN1_MCF7	CEBPB_H1
0	0.278592	0.0169492	0	0.25	0.166667	0.426471	0.214286	0.314286	0.634146	0.368421	0.728636	0.395722	0.527778	0.545455	0.0697674	0.0555556	0.0052356
1	0.328446	0.0762712	0.166667	0.25	0.183333	0.386029	0.125	0.357143	0.621951	0.315789	0.752624	0.409091	0.541667	0.545455	0.104651	0.0972222	0.0445026
2	0.318182	0.182203	0.259259	0.3125	0.2	0.426471	0.214286	0.357143	0.646341	0.298246	0.794603	0.419786	0.486111	0.545455	0.0930233	0.125	0.0693717
3	0.318182	0.228814	0.259259	0.375	0.333333	0.411765	0.214286	0.285714	0.585366	0.368421	0.783358	0.524064	0.472222	0.454545	0.19186	0.208333	0.10733
4	0.337243	0.288136	0.333333	0.364583	0.3	0.411765	0.267857	0.328571	0.536585	0.377193	0.73988	0.526738	0.458333	0.409091	0.290698	0.263889	0.11911
5	0.375367	0.29661	0.351852	0.291667	0.266667	0.397059	0.214286	0.314286	0.536585	0.5	0.661169	0.505348	0.458333	0.363636	0.261628	0.236111	0.141361
6	0.348974	0.258475	0.277778	0.177083	0.333333	0.3125	0.25	0.3	0.414634	0.552632	0.604198	0.516043	0.388889	0.272727	0.302326	0.236111	0.124346
7	0.325513	0.271186	0.351852	0.166667	0.416667	0.283088	0.25	0.285714	0.365854	0.561404	0.557721	0.52139	0.291667	0.227273	0.331395	0.25	0.191099
8	0.268328	0.29661	0.425926	0.104167	0.266667	0.242647	0.321429	0.2	0.317073	0.517544	0.51949	0.564171	0.25	0.136364	0.389535	0.263889	0.168848
9	0.255132	0.300847	0.555556	0.21875	0.4	0.227941	0.303571	0.142857	0.317073	0.447368	0.487256	0.582888	0.166667	0.0454545	0.348837	0.263889	0.189791
10	0.187683	0.25	0.5	0.291667	0.433333	0.191176	0.392857	0.142857	0.292683	0.429825	0.428786	0.526738	0.166667	0.0909091	0.360465	0.194444	0.129581
11	0.171554	0.25	0.462963	0.322917	0.433333	0.143382	0.303571	0.114286	0.219512	0.473684	0.33958	0.457219	0.25	0.0909091	0.389535	0.222222	0.112565
12	0.130499	0.220339	0.351852	0.385417	0.5	0.117647	0.303571	0.142857	0.146341	0.385965	0.261619	0.451872	0.263889	0.181818	0.412791	0.236111	0.109948
13	0.085044	0.0932203	0.37037	0.375	0.5	0.0477941	0.321429	0.185714	0.134146	0.385965	0.215892	0.44385	0.277778	0.227273	0.366279	0.180556	0.116492
14	0.042522	0.114407	0.537037	0.458333	0.466667	0.0808824	0.339286	0.257143	0.134146	0.298246	0.202399	0.441176	0.277778	0.227273	0.343023	0.222222	0.113874
15	0.0659824	0.148305	0.574074	0.4375	0.35	0.0477941	0.196429	0.285714	0.0731707	0.236842	0.194153	0.483957	0.263889	0.181818	0.377907	0.166667	0.159686
16	0.0923754	0.177966	0.425926	0.46875	0.45	0.139706	0.178571	0.3	0.097561	0.192982	0.153673	0.494652	0.319444	0.181818	0.30814	0.180556	0.112565
17	0.167155	0.279661	0.351852	0.458333	0.366667	0.205882	0.125	0.3	0.134146	0.210526	0.0907046	0.36631	0.263889	0.227273	0.19186	0.125	0.108639
18	0.211144	0.385593	0.296296	0.489583	0.366667	0.172794	0.214286	0.357143	0.219512	0.263158	0.0472264	0.339572	0.305556	0.181818	0.168605	0.0694444	0.0929319
19	0.221408	0.372881	0.222222	0.552083	0.533333	0.253676	0.178571	0.285714	0.243902	0.22807	0.0554723	0.34492	0.25	0.181818	0.238372	0.152778	0.108639
20	0.180352	0.254237	0.259259	0.510417	0.483333	0.227941	0.232143	0.285714	0.219512	0.201754	0.142429	0.360963	0.25	0.272727	0.302326	0.138889	0.111257
21	0.153959	0.233051	0.351852	0.5	0.416667	0.220588	0.303571	0.4	0.365854	0.201754	0.285607	0.320856	0.319444	0.272727	0.319767	0.180556	0.129581
22	0.107038	0.173729	0.407407	0.53125	0.4	0.209559	0.339286	0.328571	0.414634	0.289474	0.407046	0.240642	0.277778	0.318182	0.337209	0.277778	0.116492
23	0.133431	0.199153	0.37037	0.510417	0.416667	0.272059	0.303571	0.385714	0.512195	0.324561	0.46027	0.200535	0.361111	0.227273	0.290698	0.305556	0.141361
24	0.175953	0.233051	0.351852	0.510417	0.35	0.367647	0.357143	0.428571	0.512195	0.324561	0.495502	0.120321	0.361111	0.227273	0.30814	0.402778	0.168848
25	0.312317	0.402542	0.388889	0.395833	0.383333	0.463235	0.321429	0.371429	0.560976	0.315789	0.555472	0.144385	0.402778	0.318182	0.377907	0.388889	0.291885
26	0.38563	0.338983	0.518519	0.40625	0.583333	0.540441	0.464286	0.485714	0.621951	0.289474	0.642429	0.262032	0.430556	0.409091	0.476744	0.472222	0.45288
27	0.520528	0.355932	0.703704	0.416667	0.6	0.617647	0.464286	0.5	0.621951	0.210526	0.702399	0.318182	0.402778	0.5	0.47093	0.555556	0.616492
28	0.714076	0.538136	0.611111	0.364583	0.516667	0.650735	0.589286	0.5	0.621951	0.219298	0.726387	0.435829	0.361111	0.545455	0.5	0.486111	0.806283
29	0.796188	0.614407	0.537037	0.3125	0.533333	0.558824	0.678571	0.557143	0.682927	0.184211	0.708396	0.553476	0.222222	0.727273	0.587209	0.458333	0.865183
30	0.876833	0.661017	0.518519	0.28125	0.466667	0.522059	0.767857	0.514286	0.670732	0.22807	0.682159	0.572193	0.0833333	0.772727	0.709302	0.458333	0.914921
31	0.980938	0.889831	0.574074	0.270833	0.45	0.643382	0.785714	0.614286	0.756098	0.254386	0.678411	0.673797	0.277778	0.772727	0.796512	0.416667	0.950262
32	0.979472	0.898305	0.574074	0.291667	0.466667	0.672794	0.910714	0.614286	0.609756	0.27193	0.726387	0.684492	0.416667	0.818182	0.744186	0.402778	0.908377
33	0.960411	0.834746	0.62963	0.291667	0.566667	0.783088	0.839286	0.728571	0.536585	0.342105	0.823088	0.871658	0.513889	0.772727	0.680233	0.375	0.897906
34	0.829912	0.665254	0.685185	0.34375	0.566667	0.797794	0.821429	0.885714	0.512195	0.412281	0.918291	0.914439	0.458333	0.727273	0.668605	0.416667	0.827225
35	0.77566	0.805085	0.740741	0.447917	0.6	0.794118	0.732143	0.871429	0.512195	0.447368	0.901049	0.882353	0.458333	0.818182	0.668605	0.402778	0.727749
36	0.673021	0.754237	0.703704	0.520833	0.566667	0.841912	0.660714	0.814286	0.573171	0.482456	0.786357	0.860963	0.597222	0.772727	0.80814	0.375	0.59555
37	0.560117	0.682203	0.722222	0.572917	0.5	0.830882	0.678571	0.8	0.536585	0.552632	0.709895	0.828877	0.694444	0.727273	0.831395	0.444444	0.434555
38	0.543988	0.707627	0.740741	0.604167	0.566667	0.797794	0.767857	0.757143	0.560976	0.561404	0.7009	0.716578	0.861111	0.727273	0.819767	0.555556	0.38089
39	0.504399	0.673729	0.833333	0.697917	0.7	0.724265	0.767857	0.842857	0.573171	0.605263	0.701649	0.665775	0.944444	0.681818	0.848837	0.458333	0.301047
40	0.453079	0.5	0.907407	0.708333	0.666667	0.632353	0.767857	0.771429	0.54878	0.605263	0.686657	0.681818	0.777778	0.5	0.843023	0.486111	0.269634
41	0.439883	0.478814	0.833333	0.770833	0.733333	0.658088	0.767857	0.7	0.573171	0.719298	0.610945	0.791444	0.763889	0.5	0.843023	0.555556	0.289267
42	0.381232	0.457627	0.740741	0.84375	0.75	0.761029	0.803571	0.585714	0.463415	0.780702	0.556972	0.606952	0.708333	0.409091	0.773256	0.680556	0.253927
43	0.370968	0.508475	0.740741	0.895833	0.7	0.808824	0.678571	0.471429	0.463415	0.763158	0.505997	0.553476	0.805556	0.454545	0.674419	0.791667	0.198953
44	0.277126	0.266949	0.62963	0.916667	0.666667	0.735294	0.625	0.471429	0.536585	0.894737	0.507496	0.540107	0.972222	0.590909	0.598837	0.819444	0.145288
45	0.244868	0.275424	0.648148	0.875	0.716667	0.628676	0.625	0.6	0.5	0.95614	0.52099	0.548128	0.847222	0.636364	0.517442	0.861111	0.0837696
46	0.205279	0.233051	0.685185	0.822917	0.766667	0.518382	0.607143	0.585714	0.54878	0.921053	0.544978	0.55615	0.791667	0.545455	0.494186	0.805556	0.0641361
47	0.142229	0.105932	0.740741	0.833333	0.766667	0.555147	0.517857	0.542857	0.512195	0.894737	0.521739	0.641711	0.652778	0.590909	0.459302	0.722222	0.065445
48	0.131965	0.127119	0.722222	0.75	0.683333	0.573529	0.589286	0.457143	0.609756	0.833333	0.450525	0.609626	0.583333	0.545455	0.424419	0.763889	0.100785
49	0.101173	0.161017	0.611111	0.65625	0.55	0.573529	0.607143	0.514286	0.609756	0.763158	0.332834	0.596257	0.569444	0.545455	0.290698	0.708333	0.100785
50	0.0762463	0.144068	0.555556	0.552083	0.45	0.547794	0.660714	0.514286	0.585366	0.719298	0.284108	0.467914	0.444444	0.545455	0.302326	0.597222	0.125654
51	0.0777126	0.118644	0.555556	0.552083	0.433333	0.580882	0.642857	0.457143	0.5	0.657895	0.258621	0.590909	0.486111	0.636364	0.354651	0.430556	0.126963
52	0.0498534	0.0169492	0.555556	0.46875	0.333333	0.650735	0.678571	0.528571	0.402439	0.649123	0.238381	0.558824	0.444444	0.590909	0.366279	0.333333	0.153141
53	0.0439883	0.0762712	0.555556	0.385417	0.266667	0.643382	0.553571	0.471429	0.414634	0.5	0.262369	0.561497	0.305556	0.590909	0.47093	0.416667	0.153141
54	0.0175953	0.0466102	0.444444	0.270833	0.266667	0.632353	0.517857	0.4	0.47561	0.403509	0.283358	0.451872	0.25	0.545455	0.424419	0.416667	0.151832
55	0.0249267	0.0508475	0.388889	0.302083	0.266667	0.569853	0.464286	0.4	0.390244	0.315789	0.277361	0.358289	0.236111	0.363636	0.383721	0.388889	0.157068
56	0.0835777	0.224576	0.388889	0.322917	0.166667	0.533088	0.303571	0.485714	0.439024	0.324561	0.295352	0.342246	0.263889	0.363636	0.360465	0.319444	0.132199
57	0.123167	0.258475	0.37037	0.291667	0.133333	0.514706	0.303571	0.528571	0.378049	0.254386	0.314093	0.433155	0.333333	0.318182	0.348837	0.277778	0.168848
58	0.192082	0.29661	0.407407	0.197917	0.133333	0.698529	0.339286	0.542857	0.292683	0.210526	0.377061	0.470588	0.25	0.318182	0.517442	0.208333	0.20288
59	0.177419	0.271186	0.574074	0.21875	0.2	0.761029	0.482143	0.557143	0.243902	0.105263	0.407046	0.580214	0.180556	0.5	0.581395	0.236111	0.21466
60	0.170088	0.25	0.555556	0.21875	0.233333	0.746324	0.410714	0.685714	0.170732	0.0438596	0.428786	0.548128	0.166667	0.454545	0.622093	0.236111	0.235602
